# Supplementary material for: Mapping endothelial-cell diversity in cerebral cavernous malformations at single-cell resolution
Source: eLife. 2020 Nov 3;9:e61413. doi: 10.7554/eLife.61413 (PMC7609066; doi:10.7554/eLife.61413)
Supplement: Figure 2—source data 1. [file elife-61413-fig2-data1.xlsx]

## Sheet: Sheet1
Figure 2F
Permeability to IgG
Pdcd10-wt Cerebellum		Pdcd10-ko Cerebellum		Pdcd10-wt Hippocampus		Pdcd10-ko hippocampus		Pdcd10-wt Cortex		Pdcd10-wt Cortex
Section1	Section2	Section1	Section2	Section1	Section2	Section1	Section2	Section1	Section2	Section1	Section2
0.52		9.499	7.899	1.391		5.783	5.115	0.632		2.944	2.84
1.301	1.005	3.658	4.006	3.687	3.348	5.051	5.011	1.495	1.288	2.224	2.234
1.524	1.942	3.624	3.979	2.48	2.54	4.618	3.973	1.04	1.083	1.891	2.229
0.614	0.909	3.779	5.597	6.333	3.546	11.64	8.598	2.302	1.713	3.712	4.688
0.891	1.43	5.435	5.017	6.1	4.919	9.725	7.342	2.535	2.345	3.942	4.62
		4.059	3.155			7.647	5.757			3.235	3.165
		5.194
