# Supplementary material for: Mapping endothelial-cell diversity in cerebral cavernous malformations at single-cell resolution
Source: eLife. 2020 Nov 3;9:e61413. doi: 10.7554/eLife.61413 (PMC7609066; doi:10.7554/eLife.61413)
Supplement: Figure 4—source data 1. [file elife-61413-fig4-data1.xlsx]

## Sheet: Sheet1
Figure 4E
Mki67 positive ECs
Pdcd10-wt	Pdcd10-ko, pseudo normal	Pdcd10-ko, lesions
23.9787	14.6067	93.4783
21.1812	48.1281	66.6276
17.2645	13.0952	84.6665
17.3795	19.9688	48.7101
20.809	14.561	36.0925
17.4602	11.7464	55.1271
