# Supplementary material for: Mapping endothelial-cell diversity in cerebral cavernous malformations at single-cell resolution
Source: eLife. 2020 Nov 3;9:e61413. doi: 10.7554/eLife.61413 (PMC7609066; doi:10.7554/eLife.61413)
Supplement: Figure 5—source data 1. [file elife-61413-fig5-data1.xlsx]

## Sheet: Sheet1
Figure 5E			Figure 5G			Figure 5H			Figure 5H			Figure 5H			Figure 5J
uPAR expression			Tip Cells, brain			Tip Cells			Tip-Like Cells			Filopodia/cell			Radial Expansion
Pdcd10-wt	Pdcd10-ko		Pdcd10-wt	Pdcd10-ko		Pdcd10-wt	Pdcd10-ko		Pdcd10-wt	Pdcd10-ko		Pdcd10-wt	Pdcd10-ko		Pdcd10-wt	Pdcd10-ko
17.446	60.966		88.8	82.9		1.6478	2.3237		6.9	16.2		9.6	7.8		1900.84	1318.05
18.563	54.359		89	58.8		2.1279	2.4406		10.9	23.6		6.9	10.1		1887.61	1463.31
23.541	44.449		96.4	52.4		2.2495	2.7122		13.5	15		10.5	11.2		1814.57	1367.62
			61.3	61.8		1.9738	2.2409		14.3	14.6		10	9.1		2100.51	1894.6
			55.4	69.1		1.8517	2.7216		15.6	18		9.1	9.9		2067.05	1655.77
			79.7	83		2.2235	2.3015		14	11.5		10.5	9.6		1717.56	1820.73
						1.82781	2.3809		10.5	34.6		8.7	8.7		1983.71	1435.66
						1.53755	3.6714		3.9	15.5		11.2	8.7		1786.12	1179.04
						2.05352	2.0485		5.5	10.5		9.2	10.3		1821.4	1481.92
						2.53938	3.3449		10.5	16.3		8.8	8.8		1815.46	1229.36
							2.6711			16.7			10.4			1546.25
							3.5374			35			8.9			876.211
							3.2568			14.2			9.8			1455.63
