# Supplementary material for: Mapping endothelial-cell diversity in cerebral cavernous malformations at single-cell resolution
Source: eLife. 2020 Nov 3;9:e61413. doi: 10.7554/eLife.61413 (PMC7609066; doi:10.7554/eLife.61413)
Supplement: Supplementary file 1. [file elife-61413-supp1.xlsx]

## Sheet: Sheet1
Supplementary File 1: Marker genes used in Figure 1H and references
		Cluster canonical marker gene (padj<0.05; green)
ECs subtype	Gene Symbol	0	1	2	3	4	5	6	7	8	9	10	11	12	13	14	15	16	References	Additional Notes
Arterial	Fbln2																		Vanlandewijck et al. Nature 2018 (PMID: 29443965), Sabbagh et al. Elife 2018 (PMID: 30188322), He et al. SciData 2018 (PMID: 30129931)
	Fbln5																		Vanlandewijck et al. Nature 2018 (PMID: 29443965), Sabbagh et al. Elife 2018 (PMID: 30188322), He et al. SciData 2018 (PMID: 30129931)	Stalk cells in Zhao et al. Cancer Res 2018 (PMID: 29449267)
	Bmx																		Vanlandewijck et al. Nature 2018 (PMID: 29443965), Rajantie et al. Mol Cell Biol 2001 (PMID: 11416142), Ekman et al. Circulation 1997 (PMID: 9323053), He et al. SciData 2018 (PMID: 30129931)
	Gja4																		Vanlandewijck et al. Nature 2018 (PMID: 29443965), Sabbagh et al. Elife 2018 (PMID: 30188322), He et al. SciData 2018 (PMID: 30129931)
	Gja5																		Su et al. Nature 2018 (PMID: 29973725), Lanner et al. Stem Cells Dev 2013 (PMID: 23379656), Buschmann et al. Development 2010 (PMID: 20530546),
	Mgp																		Vanlandewijck et al. Nature 2018 (PMID: 29443965), Sabbagh et al. Elife 2018 (PMID: 30188322), He et al. SciData 2018 (PMID: 30129931)
	Col18a1																		Vanlandewijck et al. Nature 2018 (PMID: 29443965), Sabbagh et al. Elife 2018 (PMID: 30188322), He et al. SciData 2018 (PMID: 30129931)
	Syt15																		Vanlandewijck et al. Nature 2018 (PMID: 29443965), Sabbagh et al. Elife 2018 (PMID: 30188322), He et al. SciData 2018 (PMID: 30129931)
	Vegfc																		Vanlandewijck et al. Nature 2018 (PMID: 29443965), Sabbagh et al. Elife 2018 (PMID: 30188322), He et al. SciData 2018 (PMID: 30129931)
	Sema3g																		Kutschera et al. ATVB 2011 (PMID: 20947821), Sabbagh et al. Elife 2018 (PMID: 30188322), He et al. SciData 2018 (PMID: 30129931)
	Unc5b																		Su et al. Nature 2018 (PMID: 29973725)	Tip cells in Lu et al. Nature 2004 (PMID: 15510105); Arterial cells and capillary sprouts in Larrivèe et al. Genes Dev. 2007 (PMID: 17908930).
	Hey1																		Vanlandewijck et al. Nature 2018 (PMID: 29443965), Su et al. Nature 2018 (PMID: 29973725), He et al. SciData 2018 (PMID: 30129931)
	Notch4																		Su et al. Nature 2018 (PMID: 29973725), Whyte et al. 2013 (PMID: 23830865), Villa et al 2001 (PMID: 11578869),	Tip cells in Zhao et al. Cancer Res 2018 (PMID: 29449267)
	Efnb2																		Wang et al. Cell 1998 (PMID: 9630219), Su et al. Nature 2018 (PMID: 29973725),
	Igfbp3																		Vanlandewijck et al. Nature 2018 (PMID: 29443965), Su et al. Nature 2018 (PMID: 29973725), He et al. SciData 2018 (PMID: 30129931)
	Egfl8																		Vanlandewijck et al. Nature 2018 (PMID: 29443965), Sabbagh et al. Elife 2018 (PMID: 30188322), He et al. SciData 2018 (PMID: 30129931)
	Dkk2																		Vanlandewijck et al. Nature 2018 (PMID: 29443965), Sabbagh et al. Elife 2018 (PMID: 30188322), He et al. SciData 2018 (PMID: 30129931)
	Gkn3																		Vanlandewijck et al. Nature 2018 (PMID: 29443965), Sabbagh et al. Elife 2018 (PMID: 30188322), He et al. SciData 2018 (PMID: 30129931)
	Eln																		Vanlandewijck et al. Nature 2018 (PMID: 29443965), Sabbagh et al. Elife 2018 (PMID: 30188322), He et al. SciData 2018 (PMID: 30129931)
	Sox17																		Corada et al. Nat Commun. 2013 (24153254)
Capillaries	Pcx																		Sabbagh et al. Elife 2018 (PMID: 30188322),	Arterial capillaries in Sabbagh et al. Elife 2018 (PMID: 30188322)
	Fgfbp1																		Vanlandewijck et al. Nature 2018 (PMID: 29443965), Sabbagh et al. Elife 2018 (PMID: 30188322), He et al. SciData 2018 (PMID: 30129931)	Arterial capillaries in Sabbagh et al. Elife 2018 (PMID: 30188322)
	Gpr85																		Vanlandewijck et al. Nature 2018 (PMID: 29443965), Sabbagh et al. Elife 2018 (PMID: 30188322), He et al. SciData 2018 (PMID: 30129931)	Arterial capillaries in Sabbagh et al. Elife 2018 (PMID: 30188322)
	Slc1a1																		Vanlandewijck et al. Nature 2018 (PMID: 29443965), Sabbagh et al. Elife 2018 (PMID: 30188322), He et al. SciData 2018 (PMID: 30129931)	Arterial capillaries in Sabbagh et al. Elife 2018 (PMID: 30188322)
	Kcnj2																		Sabbagh et al. Elife 2018 (PMID: 30188322), Jackson Microcirculation 2017 (PMID: 27652592),	Arterial capillaries in Sabbagh et al. Elife 2018 (PMID: 30188322)
	Cxcr4																		Strasser et al. Blood 2010 (PMID: 20154215), Sabbagh et al. Elife 2018 (PMID: 30188322), Schwefel et al. J Cell Mol Med 2019 (PMID: 30549232),	Arterial capillaries in Sabbagh et al. Elife 2018 (PMID: 30188322)
	Cdkn2b																		Sabbagh et al. Elife 2018 (PMID: 30188322),	Arterial capillaries in Sabbagh et al. Elife 2018 (PMID: 30188322)
	Atp1b1																		Sabbagh et al. Elife 2018 (PMID: 30188322),	Venous capillaries in Sabbagh et al. Elife 2018 (PMID: 30188322)
	Gpatch4																		Sabbagh et al. Elife 2018 (PMID: 30188322),	Venous capillaries in Sabbagh et al. Elife 2018 (PMID: 30188322)
	Fam69b																		Sabbagh et al. Elife 2018 (PMID: 30188322), Tennant-Eyles et al. Biochem Biophys Res Commun 2011 (PMID: 21334309),	Venous capillaries in Sabbagh et al. Elife 2018 (PMID: 30188322)
	Klk8																		Sabbagh et al. Elife 2018 (PMID: 30188322), He et al. SciData 2018 (PMID: 30129931)	Venous in Vanlandewijck et al. Nature 2018 (PMID: 29443965) and Goveia J et al. Cancer Cell 2020 (PMID: 31935371); Venous capillaries in Sabbagh et al. Elife 2018 (PMID: 30188322)
Venous	Lbp																		Vanlandewijck et al. Nature 2018 (PMID: 29443965), Sabbagh et al. Elife 2018 (PMID: 30188322), He et al. SciData 2018 (PMID: 30129931)
	Hs3st1																		Sabbagh et al. Elife 2018 (PMID: 30188322), He et al. SciData 2018 (PMID: 30129931), Goveia J et al. Cancer Cell 2020 (PMID: 31935371)
	Ephb4																		Wang et al. Cell 1998 (PMID: 9630219), Su et al. Nature 2018 (PMID: 29973725),
	Flrt2																		Vanlandewijck et al. Nature 2018 (PMID: 29443965), He et al. SciData 2018 (PMID: 30129931)
	Ptgis																		Vanlandewijck et al. Nature 2018 (PMID: 29443965), He et al. SciData 2018 (PMID: 30129931), Goveia J et al. Cancer Cell 2020 (PMID: 31935371)
	Nrp2																		Herzog et al. Mech Dev 2001 (PMID:11677062), Yuan et al. Development 2002 (PMID: 12361971), ,
	Nr2f2																		Vanlandewijck et al. Nature 2018 (PMID: 29443965), Su et al. Nature 2018 (PMID: 29973725), He et al. SciData 2018 (PMID: 30129931)
	Adh1																		Vanlandewijck et al. Nature 2018 (PMID: 29443965), Sabbagh et al. Elife 2018 (PMID: 30188322), He et al. SciData 2018 (PMID: 30129931)
	Car14																		Vanlandewijck et al. Nature 2018 (PMID: 29443965), Sabbagh et al. Elife 2018 (PMID: 30188322), He et al. SciData 2018 (PMID: 30129931)
	Ackr1																		Vanlandewijck et al. Nature 2018 (PMID: 29443965), Thiriot et al. BMC Biol 2017 (PMID: 28526034), Goveia J et al. Cancer Cell 2020 (PMID: 31935371)
Tip Cells	Apln																		Del Toro et al. Blood 2010 (PMID: 20705756)
	Cd82																		Wei Q, et al. Circulation 2014 (PMID: 25149363), Li W, et al. Oncogene 2017 (PMID: 28534512), Nagao K and Oka K. Biochem Biophys Res Commun 2011 (PMID: 21382346)
	Fscn1																		Jayo A, et al. BMC Biol 2012 (PMID: 22883572)
	Mmrn2																		Lugano R, et al. J Clin Invest 2018 (PMID: 29763414), Noy PJ, et al. Oncogene 2015 (PMID: 25745997), Andreuzzi E, et al. Matrix Biol 2017 (PMID: 28435016)
	Plk2																		Yang H, et al. Dev Biol 2015 (PMID: 26004360)
	Dll4																		Pitulescu et al. Nat Cell Biol 2017 (PMID: 28714968), Hellström et al. Nature 2007 (PMID: 17259973), Zhao Q, et al. Cancer Res 2018 (PMID: 29449267)	Arterial in Su et al. Nature 2018 (PMID: 29973725)
	Nrp1																		Fantin et al. Cell Rep 2015 ( PMID: 26051942), Aspalter et al. Nat Commun 2015 (PMID: 26081042)	Arterial in Park et al. Stem Cell Res Ther 2018 (PMID: 30021650)
	Chst1																		Sabbagh et al. Elife 2018 (PMID: 30188322),
	Pde4b																		Sabbagh et al. Elife 2018 (PMID: 30188322),
	Adm																		Sabbagh et al. Elife 2018 (PMID: 30188322), Zhao et al. Cancer Res 2018 (PMID 29449267), He et al. SciData 2018 (PMID: 30129931)	Capillary in Vanlandewijck et al. Nature 2018 (PMID: 29443965)
	Angpt2																		Strasser et al. Blood 2010 (PMID: 20154215), Del Toro et al. Blood 2010 (PMID: 20705756), Sabbagh et al. Elife 2018 (PMID: 30188322), He et al. SciData 2018 (PMID: 30129931)	Capillary in Vanlandewijck et al. Nature 2018 (PMID: 29443965)
	Oaf																		Sabbagh et al. Elife 2018 (PMID: 30188322)
	Mcam																		Sabbagh et al. Elife 2018 (PMID: 30188322), Zhao Q, et al. Cancer Res 2018. (PMID 29449267)
	Serpine1																		Sabbagh et al. Elife 2018 (PMID: 30188322)
	Sirpa																		Sabbagh et al. Elife 2018 (PMID: 30188322)
	Plaur																		Del Toro et al. Blood 2010 (PMID: 20705756), Sabbagh et al. Elife 2018 (PMID: 30188322)
	Esm1																		Rocha et al. Circ Res 2014 (PMID: 25057127)
	Pfkfb3																		De Bock et al. Cell 2013 (PMID: 23911327)
Mitotic	Ube2c																		Sabbagh et al. Elife 2018 (PMID: 30188322), Chou et al. PLoS One 2014 (PMID:24699941), Liu et al. J Cancer 2019 (PMID: 31258721)
	Aurkb																		Sabbagh et al. Elife 2018 (PMID: 30188322), Carmena et al. Curr Opin Cell Biol 2009 (PMID: 19836940)
	Kif23																		Sabbagh et al. Elife 2018 (PMID: 30188322), Liljeholm et al. Blood 2013 (PMID: 23570799)
	Cdca5																		Zhang et al. Cell Cycle 2012 (PMID: 22580470), Sabbagh et al. Elife 2018 (PMID: 30188322)
	Fam83d																		Wang et al. Biochem Biophys Res Commun (PMID: 25646692), Sabbagh et al. Elife 2018 (PMID: 30188322)
	Mki67																		Gerdes et al. Int J Cancer 1983 (PMID: 6339421)
	Shcbp1																		Sabbagh et al. Elife 2018 (PMID: 30188322), Asano et al. Cell Cycle 2014 (PMID: 25486361)
	Kif20b																		Sabbagh et al. Elife 2018 (PMID: 30188322), Janisch et al. Mol Biol Cell 2018 (PMID: 29167382)
	Bub1b																		Ciossani et al. J Biol Chem 2018 (PMID: 29748388), Sabbagh et al. Elife 2018 (PMID: 30188322)
	Birc5																		Sabbagh et al. Elife 2018 (PMID: 30188322), Carmena et al. Curr Opin Cell Biol 2009 (PMID: 19836940), Skoufias et al. J Cell Biol 2000 (PMID: 11134084)
	Fam64a																		Archangelo et al. Mol Oncol 2008 (PMID: 19383357), Sabbagh et al. Elife 2018 (PMID: 30188322), Kallio et al. FASEB J 2001 (PMID: 11687505)
	Depdc1a																		Sabbagh et al. Elife 2018 (PMID: 30188322), Chen et al. Exp Cell Res 2017 (PMID: 28602627)
	Hmmr																		Sabbagh et al. Elife 2018 (PMID: 30188322), Matou-Nasri et al. Int J Oncol 2009 (PMID: 19724912), Savani et al. J Biol Chem 2001 (PMID: 11448954), Maxwell et al. J Cell Sci 2008 (PMID: 18354082)
	Bub1																		Ciossani et al. J Biol Chem 2018 (PMID: 29748388), Sabbagh et al. Elife 2018 (PMID: 30188322)
	Cep55																		Fabbro et al. Dev Cell 2005 (PMID: 16198290), Sabbagh et al. Elife 2018 (PMID: 30188322)
	Plk1																		Conduit et al. Nat Rev Mol Cell Biol (PMID: 26373263), Sabbagh et al. Elife 2018 (PMID: 30188322)
	Nuf2																		Ciferri et al. FEBS let 2007 (PMID: 17521635), Sabbagh et al. Elife 2018 (PMID: 30188322)
	Anln																		Sabbagh et al. Elife 2018 (PMID: 30188322), Zhang et al. J Cell Physiol 2019 (PMID: 31637715)
	Dlgap5																		Sabbagh et al. Elife 2018 (PMID: 30188322), Cohen et al. Hematology 2014 (PMID 24074379), Schneider et al. Int J Oncol 2017 (PMID: 28101582)
	Cenpe																		Ciossani et al. J Biol Chem 2018 (PMID: 29748388), Sabbagh et al. Elife 2018 (PMID: 30188322)
	Mxd3																		Sabbagh et al. Elife 2018 (PMID: 30188322)
	Ska1																		Sabbagh et al. Elife 2018 (PMID: 30188322), Thomas et al. Nat Commun 2016 (PMID: 27225956)
	Kif20a																		Sabbagh et al. Elife 2018 (PMID: 30188322), Exertier et al. Oncotarget 2013 (PMID: 24327603), Wu et al. Eur J Cell Biol 2019 (PMID: 30579662)
	Kifc1																		Sabbagh et al. Elife 2018 (PMID: 30188322), Cai et al. Mol Biol Cell 2009 (PMID: 19116309)
	Diaph3																		Watanabe et al. Mol Biol Cell 2008 (PMID: 18287523), Sabbagh et al. Elife 2018 (PMID: 30188322)
	Kif4																		Sabbagh et al. Elife 2018 (PMID: 30188322), Hu et al. Curr Biol 2011 (PMID: 21565503)
	Ccnb2																		Huang et al. Plos One 2013 (PMID: 24324638), Gui et al. Dev Cell 2013 (PMID: 23541922)
	Cenpa																		Regnier V et al. Mol Cell Biol 2005 (PMID15870271), Suzuki et al. Dev Cell 2014 (PMID: 25268173)
	Cks2																		Liberal V et al. Proc Natl Acad Sci U S A 2012 (PMID: 21697511)
	Ube2s																		Garnett et al. Nat Cell Biol 2009 (PMID: 19820702)
	Top2a																		Goswami PC et al. Mol Cel Biol. 1996 (PMID: 8657123), Broderik et al. Cell Cycle 2015 (PMID: 26266709)
Pericytes	Cspg4																		Armulik A et al. Circ Res 2005 (PMID: 16166562)
	Des																		Armulik A et al. Circ Res 2005 (PMID: 16166562)
	Anpep																		Armulik A et al. Circ Res 2005 (PMID: 16166562)
	Acta2																		Armulik A et al. Circ Res 2005 (PMID: 16166562)
Astrocytes	Gfap																		Middeldorp et al. Prog Neurobiol 2011 (PMID: 21219963)
	Aqp4																		Papadopoulos et al. Nat Rev Neurosci 2013 (PMID: 23481483)
	Slc1a2																		Takahashi K et al. Cell Mol Life Sci 2015 (PMID: 26033496)
	Slc1a3																		Takahashi K et al. Cell Mol Life Sci 2015 (PMID: 26033496)
Microglia	Tmem119																		Satoh J et al. Neuropathology. 2016 (PMID: 26250788), Bennet ML et al. Proc Natl Acad Sci U S A. 2016 (PMID: 26884166), http://www.brainrnaseq.org
	Ly86																		Bennet ML et al. Proc Natl Acad Sci U S A. 2016 (PMID: 26884166), http://www.brainrnaseq.org
	Fcer1g																		Bennet ML et al. Proc Natl Acad Sci U S A. 2016 (PMID: 26884166), http://www.brainrnaseq.org
	Fcrls																		Bennet ML et al. Proc Natl Acad Sci U S A. 2016 (PMID: 26884166), http://www.brainrnaseq.org
	Cx3cr1																		Bennet ML et al. Proc Natl Acad Sci U S A. 2016 (PMID: 26884166), http://www.brainrnaseq.org
	Itgam																		Bennet ML et al. Proc Natl Acad Sci U S A. 2016 (PMID: 26884166), http://www.brainrnaseq.org
	Olfml3																		Bennet ML et al. Proc Natl Acad Sci U S A. 2016 (PMID: 26884166), http://www.brainrnaseq.org
