# Supplementary material for: Mapping endothelial-cell diversity in cerebral cavernous malformations at single-cell resolution
Source: eLife. 2020 Nov 3;9:e61413. doi: 10.7554/eLife.61413 (PMC7609066; doi:10.7554/eLife.61413)
Supplement: Supplementary file 2. — The table refers to Figure 2C and shows, for the genes included in the heatmap: (1) gene symbol, with basic gene informations; (2) the average logFC observed in each cluster (Pdcd10-ko vs. Pdcd10-wt); (3) a selected list of bibliographic references supporting the choice of each marker. [file elife-61413-supp2.xlsx]

## Sheet: Supplementary file 2
Supplementary File 2: known lesion marker genes, showing average logFC in each cluster and bibliographic references
The table refers to Figure 2C and shows, for the genes included in the heatmap: 1) gene symbol, with basic gene informations; 2) the average logFC observed in each cluster (Pdcd10 ko vs Pdcd10 wt); 3) a selected list of bibliographic references supporting the choice of each marker.
Gene symbol	Entrez Gene Id (MGI)	Gene Description	Average logFC, Pdcd10 ko vs Pdcd10 wt, in each cluster												References
			C0	C1	C2	C3	C4	C5	C6	C7	C8	C9	C12	C14
Pdcd10 (Ccm3)	1928396	Programmed cell death 10	-0.417205	-0.278144	-0.289421	-0.259973	-0.296886	-0.253671	-0.442155	-0.496275	-0.367016	-0.293395	-0.331947	-0.281383	Bergametti et al. 2004. Am J Hum Genet. PMID: 15543491
Ly6a	107527	Lymphocyte antigen 6 complex, locus A	0.747196	0.811345	0.684441	0.47572	0.715755		1.09295	1.23889		1.34041	0.657364	0.886618	Maddaluno et al. 2013. Nature. PMID: 23748444
Klf2	1342772	Kruppel-like factor 2	0.322134	0.480889	0.369273	0.355207	0.349581	0.336845	0.698351	0.429904		0.41017	0.481732	0.462575	Cuttano et al. EMBO Mol Med.2016. PMID: 26612856; Zhou et al. 2016. PMID: 27027284
Klf4	1342287	Kruppel-like factor 4	0.301503	0.453852	0.299471	0.28176	0.331214	0.32212	0.561734	0.358268		0.409938			Cuttano et al. EMBO Mol Med.2016. PMID: 26612856; Zhou et al. 2016. PMID: 27027284
Serpine1	97608	Serine (or cysteine) peptidase inhibitor, clade E, member 1	0.425528	0.481511	0.308225	0.295158	0.268161	0.358261	0.537429				0.671475		Maddaluno et al. 2013. Nature. PMID: 23748444
Icam1	96392	Intercellular adhesion molecule 1	0.395444	0.306367	0.268193	0.3281	0.268697		0.298979						Maddaluno et al. 2013. Nature. PMID: 23748444
Id1	96396	Inhibitor of DNA binding 1, HLH protein		0.282205				0.25891	0.339186	0.299835		0.591062	0.799537		Maddaluno et al. 2013. Nature. PMID: 23748444
Msn	97167	Moesin		0.253026			0.269571		0.325241			0.304493		0.389985	Fidalgo et al. J Biol Chem 2012; Hwang and Pallas. 2015 Int J Biochem Cell Biol. PMID: 24333164
Ezr	98931	Ezrin										0.484367			Fidalgo et al. J Biol Chem 2012; Hwang and Pallas. 2015 Int J Biochem Cell Biol. PMID: 24333164
Angpt2	1202890	Angiopoietin 2		0.291118					0.363634						Zhou et al. 2016. Nat Med. PMID: 27548575
Thbd	98736	Thrombomodulin								0.299988		0.783609			Lopez-Ramirez et al. 2019. Blood. PMID: 30442679
Itgb1	96610	Integrin beta 1 (fibronectin receptor beta)										0.374794			Faurobert et al.2013. J Cell Biol. PMID: 23918940; Renz et al. Dev Cell. 2015. PMID: 25625207
Vcam1	98926	Vascular cell adhesion molecule 1										0.265821			Maddaluno et al. 2013. Nature. PMID: 23748444
Rhoa	1096342	Ras homolog family member A										0.378942	0.330498		Whitehead et al. 2009. Nat Med. PMID: 19151728. Stockton et al. J Exp Med. 2010 PMID: 20308363
Rhoc	106028	Ras homolog family member C	0.31753	0.443058	0.356611	0.270438	0.386495	0.260209	0.44033	0.3489		0.48544	0.661916	0.386417	Whitehead et al. 2009. Nat Med. PMID: 19151728. Stockton et al. J Exp Med. 2010 PMID: 20308364
Rap1a	97852	RAS-related protein 1a										0.295111			Glading et al. 2007 J Cell Biol. PMID: 17954608
Bmp2	88177	Bone morphogenetic protein 2										0.50412			Maddaluno et al. 2013. Nature. PMID: 23748444; Cuttano et al. EMBO Mol Med.2016. PMID: 26612856
Heg1	1924696	Heart development protein with EGF-like domains 1										0.368329			Kleaveland et al. Nat Med. 2009. PMID: 19151727; Zheng et al. Stroke.2014. PMID: 24643410
Pdgfa	97527	Platelet derived growth factor, alpha										0.418018			Yildirim et al. 2010. j Clin Neurosci. PMID: 20822908; Maiuri et al. 2006. Neurosurg Focus. PMID: 16859256
