# Supplementary material for: Mapping endothelial-cell diversity in cerebral cavernous malformations at single-cell resolution
Source: eLife. 2020 Nov 3;9:e61413. doi: 10.7554/eLife.61413 (PMC7609066; doi:10.7554/eLife.61413)
Supplement: Supplementary file 3. — The table refers to Figure 2D and show the results of the over-representation analysis. The table is showing, for cerebral cavernous malformation term: (1) the cluster that showed significant enrichment; (2) the DEGs contributing to the enrichment, with basic gene informations; (3) the average logFC observed in each cluster (Pdcd10-ko vs. Pdcd10-wt). [file elife-61413-supp3.xlsx]

## Sheet: Supplementary File 3
Supplementary File 3: enrichR results from RareDisease GeneRif dataset.
The table refers to Figure 2D and show the results of the over-representation analysis. The table is showing, for Cerebreal Cavernous Malformation term: 1) the cluster that showed significant enrichment; 2) the DEGs contributing to the enrichment, with basic gene informations; 3) the average logFC observed in each cluster (Pdcd10 ko vs Pdcd10 wt).
Rare Disease	Clusters with hallmark significant enrichment	Gene symbol	Entrez Gene Id (MGI)	Gene Description	average logFC, Pdcd10 ko vs Pdcd10 wt, in each cluster
					C0	C1	C2	C3	C4	C5	C6	C7	C8	C9	C12	C14
Cereberal Cavernous Malformation (CCM)	C0, C1, C2, C3, C4, C5, C6, C7, C8, C9, C12, C14	Pdcd10 (Ccm3)	1928396	Programmed cell death 10	-0.417205	-0.278144	-0.289421	-0.259973	-0.296886	-0.253671	-0.442155	-0.496275	-0.367016	-0.293395	-0.331947	-0.281383
	C0, C1, C2, C3, C4, C5, C6, C7, C9, C12, C14	Klf2	1342772	Kruppel-like factor 2	0.322134	0.480889	0.369273	0.355207	0.349581	0.336845	0.698351	0.429904		0.41017	0.481732	0.462575
	C0, C1, C2, C3, C4, C5, C6, C7, C9, C12, C14	Rhoc	106028	Ras homolog family member C	0.31753	0.443058	0.356611	0.270438	0.386495	0.260209	0.44033	0.3489		0.48544	0.661916	0.386417
	C0, C1, C2, C3, C4, C5, C6, C7, C9	Klf4	1342287	Kruppel-like factor 4	0.301503	0.453852	0.299471	0.28176	0.331214	0.32212	0.561734	0.358268		0.409938
	C1, C4, C6, C9, C12	Msn	97167	Moesin		0.253026			0.269571		0.325241			0.304493		0.389985
	C1, C6	Angpt2	1202890	Angiopoietin 2		0.291118					0.363634
	C9, C12	Rhoa	1096342	Ras homolog family member A										0.378942	0.330498
	C9	Itgb1	96610	Integrin beta 1 (fibronectin receptor beta)										0.374794
	C9	Pdgfa	97527	Platelet derived growth factor, alpha										0.418018
	C9	Ezr	98931	Ezrin										0.484367
	C9	Jun	96646	Jun proto-oncogene										-0.332518
	C9	Rap1a	97852	RAS-related protein 1a										0.295111
	C9	Heg1	1924696	Heart development protein with EGF-like domains 1										0.368329
