# Supplementary material for: Mapping endothelial-cell diversity in cerebral cavernous malformations at single-cell resolution
Source: eLife. 2020 Nov 3;9:e61413. doi: 10.7554/eLife.61413 (PMC7609066; doi:10.7554/eLife.61413)
Supplement: Supplementary file 4. — The table refers to Figure 2E and show the results of the over-representation analysis. Hallmarks are divided in categories, as in the figure. For each hallmark is shown: (1) the cluster that showed significant enrichment; (2) the DEGs contributing to the enrichment, with basic gene informations; (3) the average logFC observed in each cluster (Pdcd10-ko vs. Pdcd10-wt). [file elife-61413-supp4.xlsx]

## Sheet: Supplementary File 4
Supplementary File 4: over-representation analysis results.
The table refers to Figure 2E and show the results of the over-representation analysis. Hallmarks are divided in categories, as in the figure. For each hallmark is shown: 1) the cluster that showed significant enrichment; 2) the DEGs contributing to the enrichment, with basic gene informations; 3) the average logFC observed in each cluster (Pdcd10 ko vs Pdcd10 wt).
Category	Hallmark	Clusters with hallmark significant enrichment	Gene symbol	Entrez Gene Id	Gene Description	Average logFC, Pdcd10 ko vs Pdcd10 wt, in each cluster
						C0	C1	C2	C3	C4	C5	C6	C7	C8	C9	C12	C14
Angiogenesis	Angiogenesis	C9	Fstl1	11167	follistatin like 1										0.466854
			Pdgfa	5154	platelet derived growth factor subunit A										0.418018
			Thbd	7056	thrombomodulin										0.783609
	Notch signaling	C9	Lfng	3955	LFNG O-fucosylpeptide 3-beta-N-acetylglucosaminyltransferase										0.309454
			Sap30	8819	Sin3A associated protein 30										0.343633
	Hypoxia	C1, C6, C9	Anxa2	302	annexin A2	0.402603	0.439512	0.309587		0.361328		0.601141	0.568582		1.02115		0.358709
			Atf3	467	activating transcription factor 3	0.366596	0.351106		0.367327		0.425919	0.379368	0.334475
			Cdkn1a	1026	cyclin dependent kinase inhibitor 1A	0.503399	0.458342	0.372935	0.531869	0.526273	0.413925	0.400879		0.380259			0.457847
			Gapdh	2597	glyceraldehyde-3-phosphate dehydrogenase	0.348719	0.31323					0.482956			0.566282
			Ier3	8870	immediate early response 3		0.328511					0.427714
			Igfbp3	3486	insulin like growth factor binding protein 3	-0.432019	0.552043		-0.41595			0.822703
			Ldha	3939	lactate dehydrogenase A	0.393796	0.322588			0.306798		0.466736	0.467308		0.720794
			Pgf	5228	placental growth factor		0.587259					0.677008
			Plaur	5329	plasminogen activator, urokinase receptor	0.431798	0.567066	0.413725		0.414326		0.765944	0.429401		0.672079	0.62113	0.52257
			Serpine1	5054	serpin family E member 1	0.425528	0.481511	0.308225			0.358261	0.537429				0.671475
			Slc2a1	6513	solute carrier family 2 member 1		0.367685					0.37389			0.552567	0.647303
			Bhlhe40	8553	basic helix-loop-helix family member e40							0.307412			0.357341
			Dusp1	1843	dual specificity phosphatase 1				0.379358			0.461951				0.587389
			Mif	4282	macrophage migration inhibitory factor							0.352298			0.30185		0.332819
			Tpi1	7167	triosephosphate isomerase 1							0.45748	0.300707		0.466884
			Ackr3	57007	atypical chemokine receptor 3										0.475788
			Lxn	56925	latexin										0.367843
			Ndrg1	10397	N-myc downstream regulated 1										0.45219
			Sap30	8819	Sin3A associated protein 30										0.343633
Differentiation	Epithelial to mesenchymal transition (EMT)	C1, C6, C9	Capg	822	capping actin protein, gelsolin like	0.437953	0.522739	0.423444		0.472239	0.311366	0.696156	0.562601		0.877697
			Igfbp3	3486	insulin like growth factor binding protein 3	-0.432019	0.552043		-0.41595			0.822703
			Plaur	5329	plasminogen activator, urokinase receptor	0.431798	0.567066	0.413725		0.414326		0.765944	0.429401		0.672079	0.62113	0.52257
			Pmepa1	56937	prostate transmembrane protein, androgen induced 1		0.407885	0.306221		0.402493		0.363386
			Sat1	6303	spermidine/spermine N1-acetyltransferase 1		0.367136		0.359914		0.479278	0.418474		0.465388
			Serpine1	5054	serpin family E member 1	0.425528	0.481511	0.308225			0.358261	0.537429				0.671475
			Tnfrsf12a	51330	TNF receptor superfamily member 12A		0.432153					0.477198				0.483421
			Vim	7431	vimentin	0.508381	0.581326	0.402218		0.54958	0.352866	0.649685	0.639262		0.868139		0.543137
			Col4a1	1282	collagen type IV alpha 1 chain	0.38401						0.407795	0.33668		0.767676
			Col4a2	1284	collagen type IV alpha 2 chain	0.304817						0.362428			0.41017
			Cald1	800	caldesmon 1										0.518796
			Emp3	2014	epithelial membrane protein 3								0.327794		0.843525
			Fstl1	11167	follistatin like 1										0.466854
			Itgb1	3688	integrin subunit beta 1										0.374794
			Lgals1	3956	galectin 1								0.519224		0.924445
			Timp3	7078	TIMP metallopeptidase inhibitor 3										0.473241
			Vegfc	7424	vascular endothelial growth factor C										0.680919
	Tgf beta signaling	C1, C6, C9, C12	Pmepa1	56937	prostate transmembrane protein, androgen induced 1		0.407885	0.306221		0.402493		0.363386
			Bmp2	650	bone morphogenetic protein 2										0.50412
			Ctnnb1	1499	catenin beta 1		0.300697									0.357493
			Id1	3397	inhibitor of DNA binding 1, HLH protein							0.339186			0.591062	0.799537
			Rhoa	387	ras homolog family member A										0.378942	0.330498
			Serpine1	5054	serpin family E member 1	0.425528	0.481511	0.308225			0.358261	0.537429				0.671475
	Apical surface	C0, C1, C2, C4, C7, C9, C12, C14	Hspb1	3315	heat shock protein family B (small) member 1	0.472149	0.566293	0.593894	0.387468	0.518122	0.307047	0.86871	0.776717		0.827936	0.402037	0.759595
			Plaur	5329	plasminogen activator, urokinase receptor	0.431798	0.567066	0.413725		0.414326		0.765944	0.429401		0.672079	0.62113	0.52257
	Apical junction	C9	Actg1	71	actin gamma 1										0.32306
			Actn1	87	actinin alpha 1										0.326751
			Adam15	8751	ADAM metallopeptidase domain 15	0.373304						0.453655	0.396377		0.734213		0.383873
			Arpc2	10109	actin related protein 2/3 complex subunit 2										0.326031
			Cd34	947	CD34 molecule										0.407334
			Cnn2	1265	calponin 2										0.521765
			Icam2	3384	intercellular adhesion molecule 2							0.385819			0.386987	0.494833
			Itgb1	3688	integrin subunit beta 1										0.374794
			Msn	4478	moesin							0.325241			0.304493	0.389985
			Ywhah	7533	tyrosine 3-monooxygenase/tryptophan 5-monooxygenase activation protein eta										0.468385
Coagulation	Complement	C9	Anxa5	308	annexin A5							0.367411	0.365935		0.543974
			Calm1	801	calmodulin 1										0.36627
			Cd55	1604	CD55 molecule (Cromer blood group)										0.411303
			Col4a2	1284	collagen type IV alpha 2 chain	0.304817						0.362428			0.41017
			Csrp1	1465	cysteine and glycine rich protein 1										0.355023
			Ehd1	10938	EH domain containing 1										0.431146
			Gngt2	2793	G protein subunit gamma transducin 2	0.359208	0.445676	0.340122		0.396545		0.59492	0.41508		0.700606		0.653182
			Plaur	5329	plasminogen activator, urokinase receptor	0.431798	0.567066	0.413725		0.414326		0.765944	0.429401		0.672079	0.62113	0.52257
			S100a13	6284	S100 calcium binding protein A13										0.357667
	Coagulation	C9	Anxa1	301	annexin A1								0.328073		0.633635
			Cd9	928	CD9 molecule		0.305239			0.301863		0.474046	0.554555		0.985398
			Crip2	1397	cysteine rich protein 2										0.479409	0.363803
			Csrp1	1465	cysteine and glycine rich protein 1										0.355023
			Klk8	11202	kallikrein related peptidase 8					0.35499		0.460244	0.428869		0.967133		0.362113
			Prss23	11098	serine protease 23										0.648085
			S100a13	6284	S100 calcium binding protein A13										0.357667
			Thbd	7056	thrombomodulin										0.783609
			Timp3	7078	TIMP metallopeptidase inhibitor 3										0.473241
Immune response	Interferon alpha response	C6, C9	B2m	567	beta-2-microglobulin	0.508917	0.484814	0.439529	0.478361	0.452137	0.471215	0.476471	0.523889	0.509691	0.435665		0.360869
and inflammation			Ifitm1	8519	interferon induced transmembrane protein 1
			Ifitm3	10410	interferon induced transmembrane protein 3	0.488186					0.303152	0.40642	0.762897	0.475717	0.81913
			Ly6e	4061	lymphocyte antigen 6 family member E		0.317739					0.331771			0.343483
			Bst2	684	bone marrow stromal cell antigen 2										0.461551
			Psmb8	5696	proteasome subunit beta 8										0.430743
	Inflammatory response	C9	Bst2	684	bone marrow stromal cell antigen 2										0.461551
			Calcrl	10203	calcitonin receptor like receptor										0.373768
			Cd55	1604	CD55 molecule (Cromer blood group)										0.411303
			Emp3	2014	epithelial membrane protein 3								0.327794		0.843525
			Ifitm1	8519	interferon induced transmembrane protein 1
			Ly6e	4061	lymphocyte antigen 6 family member E		0.317739					0.331771			0.343483
			Nfkbia	4792	NFKB inhibitor alpha	0.318854	0.431169	0.386934	0.318256	0.403635		0.327892	0.342492		0.409239		0.599747
			Plaur	5329	plasminogen activator, urokinase receptor	0.431798	0.567066	0.413725		0.414326		0.765944	0.429401		0.672079	0.62113	0.52257
			Tnfrsf9	3604	TNF receptor superfamily member 9										0.574137
	Il2 Stat5 signaling	C9	Ahnak	79026	AHNAK nucleoprotein							0.458045			0.341231
			Bhlhe40	8553	basic helix-loop-helix family member e40							0.307412			0.357341
			Bmp2	650	bone morphogenetic protein 2										0.50412
			Capg	822	capping actin protein, gelsolin like	0.437953	0.522739	0.423444		0.472239	0.311366	0.696156	0.562601		0.877697
			Cd81	975	CD81 molecule										0.383203
			Emp1	2012	epithelial membrane protein 1								0.400302		0.708031
			Ifitm3	10410	interferon induced transmembrane protein 3	0.488186					0.303152	0.40642	0.762897	0.475717	0.81913
			Ndrg1	10397	N-myc downstream regulated 1										0.45219
			Plagl1	5325	PLAG1 like zinc finger 1										0.425665
			Serpinb6	5269	serpin family B member 6
			Tnfrsf9	3604	TNF receptor superfamily member 9										0.574137
	Tnfa signaling via NFKB	C0, C1, C3, C5, C6, C9	Plaur	5329	plasminogen activator, urokinase receptor	0.431798	0.567066	0.413725		0.414326		0.765944	0.429401		0.672079	0.62113	0.52257
			Ier3	8870	immediate early response 3		0.328511					0.427714
			Pmepa1	56937	prostate transmembrane protein, androgen induced 1		0.407885	0.306221		0.402493		0.363386
			Dusp1	1843	dual specificity phosphatase 1				0.379358			0.461951				0.587389
			Icam1	3383	intercellular adhesion molecule 1	0.395444	0.306367		0.3281
			Nfkbia	4792	NFKB inhibitor alpha	0.318854	0.431169	0.386934	0.318256	0.403635		0.327892	0.342492		0.409239		0.599747
			Atf3	467	activating transcription factor 3	0.366596	0.351106		0.367327		0.425919	0.379368	0.334475
			Cdkn1a	1026	cyclin dependent kinase inhibitor 1A	0.503399	0.458342	0.372935	0.531869	0.526273	0.413925	0.400879		0.380259			0.457847
			Fos	2353	Fos proto-oncogene, AP-1 transcription factor subunit						0.32949
			Fosb	2354	FosB proto-oncogene, AP-1 transcription factor subunit						0.304232
			Klf2	10365	Kruppel like factor 2	0.322134	0.480889	0.369273	0.355207	0.349581	0.336845	0.698351	0.429904		0.41017	0.481732	0.462575
			Klf4	9314	Kruppel like factor 4	0.301503	0.453852			0.331214	0.32212	0.561734	0.358268		0.409938
			Sat1	6303	spermidine/spermine N1-acetyltransferase 1		0.367136		0.359914		0.479278	0.418474		0.465388
			Serpine1	5054	serpin family E member 1	0.425528	0.481511	0.308225			0.358261	0.537429				0.671475
			Zfp36	7538	ZFP36 ring finger protein				0.386559		0.371846
			Bhlhe40	8553	basic helix-loop-helix family member e40							0.307412			0.357341
			Phlda1	22822	pleckstrin homology like domain family A member 1							0.30611
			Ackr3	57007	atypical chemokine receptor 3										0.475788
			Bmp2	650	bone morphogenetic protein 2										0.50412
			Ehd1	10938	EH domain containing 1										0.431146
			Litaf	9516	lipopolysaccharide induced TNF factor										0.366387
			Tnfrsf9	3604	TNF receptor superfamily member 9										0.574137
Apoptosis/autophagy	Apoptosis	C1, C6, C9	Atf3	467	activating transcription factor 3	0.366596	0.351106		0.367327		0.425919	0.379368	0.334475
			Cdkn1a	1026	cyclin dependent kinase inhibitor 1A	0.503399	0.458342	0.372935	0.531869	0.526273	0.413925	0.400879		0.380259			0.457847
			Ctnnb1	1499	catenin beta 1		0.300697									0.357493
			Gpx1	2876	glutathione peroxidase 1	0.304017	0.315533					0.448653			0.355031
			Hspb1	3315	heat shock protein family B (small) member 1	0.472149	0.566293	0.593894	0.387468	0.518122	0.307047	0.86871	0.776717		0.827936	0.402037	0.759595
			Ier3	8870	immediate early response 3		0.328511					0.427714
			Sat1	6303	spermidine/spermine N1-acetyltransferase 1		0.367136		0.359914		0.479278	0.418474		0.465388
			Tnfrsf12a	51330	TNF receptor superfamily member 12A		0.432153					0.477198				0.483421
			Bax	581	BCL2 associated X, apoptosis regulator	0.355972				0.324207		0.355819			0.407488
			Ifitm3	10410	interferon induced transmembrane protein 3	0.488186					0.303152	0.40642	0.762897	0.475717	0.81913
			Anxa1	301	annexin A1								0.328073		0.633635
			Bmp2	650	bone morphogenetic protein 2										0.50412
			Emp1	2012	epithelial membrane protein 1								0.400302		0.708031
			Hmgb2	3148	high mobility group box 2										0.862335
			Lmna	4000	lamin A/C								0.309131		0.421363
			Timp3	7078	TIMP metallopeptidase inhibitor 3										0.473241
			Top2a	7153	DNA topoisomerase II alpha										0.357786
			Tspo	706	translocator protein										0.493272
	mTorc1 signaling	C9	Bhlhe40	8553	basic helix-loop-helix family member e40							0.307412			0.357341
			Cd9	928	CD9 molecule		0.305239			0.301863		0.474046	0.554555		0.985398
			Gapdh	2597	glyceraldehyde-3-phosphate dehydrogenase	0.348719	0.31323					0.482956			0.566282
			Ldha	3939	lactate dehydrogenase A	0.393796	0.322588			0.306798		0.466736	0.467308		0.720794
			Psmc2	5701	proteasome 26S subunit, ATPase 2										0.304632
			Psmc6	5706	proteasome 26S subunit, ATPase 6										0.321292
			Slc2a1	6513	solute carrier family 2 member 1		0.367685					0.37389			0.552567	0.647303
			Tpi1	7167	triosephosphate isomerase 1							0.45748	0.300707		0.466884
Miscellaneous	Cholesterol homeostasis	C0, C1, C6, C7, C9, C12	Anxa5	308	annexin A5							0.367411	0.365935		0.543974
			Atf3	467	activating transcription factor 3	0.366596	0.351106		0.367327		0.425919	0.379368	0.334475
			Cd9	928	CD9 molecule		0.305239			0.301863		0.474046	0.554555		0.985398
			Plaur	5329	plasminogen activator, urokinase receptor	0.431798	0.567066	0.413725		0.414326		0.765944	0.429401		0.672079	0.62113	0.52257
			S100a11	6282	S100 calcium binding protein A11	0.361909						0.542517	0.515319		0.906874
			Actg1	71	actin gamma 1										0.32306
			Ctnnb1	1499	catenin beta 1		0.300697									0.357493
			Tnfrsf12a	51330	TNF receptor superfamily member 12A		0.432153					0.477198				0.483421
	P53 pathway	C1, C6, C9	Atf3	467	activating transcription factor 3	0.366596	0.351106		0.367327		0.425919	0.379368	0.334475
			Cdh13	1012	cadherin 13		0.31488					0.353753
			Cdkn1a	1026	cyclin dependent kinase inhibitor 1A	0.503399	0.458342	0.372935	0.531869	0.526273	0.413925	0.400879		0.380259			0.457847
			Ier3	8870	immediate early response 3		0.328511					0.427714
			Klf4	9314	Kruppel like factor 4	0.301503	0.453852			0.331214	0.32212	0.561734	0.358268		0.409938
			Phlda3	23612	pleckstrin homology like domain family A member 3	0.685957	0.436446		0.52773	0.52774	0.479709	0.651426		0.481824	0.378582		0.449741
			S100a10	6281	S100 calcium binding protein A10		0.32446					0.515942	0.87451		1.28121
	P53 pathway		Sat1	6303	spermidine/spermine N1-acetyltransferase 1		0.367136		0.359914		0.479278	0.418474		0.465388
			Bax	581	BCL2 associated X, apoptosis regulator	0.355972				0.324207		0.355819			0.407488
			Hist1h1c	3006	histone cluster 1 H1 family member c							0.340743
			Klk8	11202	kallikrein related peptidase 8					0.35499		0.460244	0.428869		0.967133		0.362113
			Rps27l	51065	ribosomal protein S27 like	0.383967			0.342006	0.354639	0.335343	0.369834
			Tm4sf1	4071	transmembrane 4 L six family member 1							0.539137	0.456058	0.310204	0.521995
			Upp1	7378	uridine phosphorylase 1							0.334714			0.528375
			Bmp2	650	bone morphogenetic protein 2										0.50412
			Cd81	975	CD81 molecule										0.383203
			Hint1	3094	histidine triad nucleotide binding protein 1										0.320567
			Ndrg1	10397	N-myc downstream regulated 1										0.45219
			Pdgfa	5154	platelet derived growth factor subunit A										0.418018
	Fatty acrid metabolism	C9	Hsp90aa1	3320	heat shock protein 90 alpha family class A member 1							0.346668			0.54654
			Ldha	3939	lactate dehydrogenase A	0.393796	0.322588			0.306798		0.466736	0.467308		0.720794
			Lgals1	3956	galectin 1								0.519224		0.924445
			Ltc4s	4056	leukotriene C4 synthase								0.503901		1.43272
			Mif	4282	macrophage migration inhibitory factor							0.352298			0.30185		0.332819
			S100a10	6281	S100 calcium binding protein A10		0.32446					0.515942	0.87451		1.28121
			Ywhah	7533	tyrosine 3-monooxygenase/tryptophan 5-monooxygenase activation protein eta										0.468385
	Androgen response	C1, C6, C7	Adamts1	9510	ADAM metallopeptidase with thrombospondin type 1 motif 1		0.37104					0.367015					0.407689
			B2m	567	beta-2-microglobulin	0.508917	0.484814	0.439529	0.478361	0.452137	0.471215	0.476471	0.523889	0.509691	0.435665		0.360869
			Pmepa1	56937	prostate transmembrane protein, androgen induced 1		0.407885	0.306221		0.402493		0.363386
			Sat1	6303	spermidine/spermine N1-acetyltransferase 1		0.367136		0.359914		0.479278	0.418474		0.465388
			Abhd2	11057	abhydrolase domain containing 2								-0.331537
			Map7	9053	microtubule associated protein 7	-0.33276						-0.374466	-0.439629		-0.47247
			Selenop	6414	selenoprotein P
			Tsc22d1	8848	TSC22 domain family member 1								-0.301919		-0.639074
	G2M checkpoint	C9	Birc5	332	baculoviral IAP repeat containing 5										0.422203
			Ccnb2	9133	cyclin B2										0.305035
			Cenpa	1058	centromere protein A										0.462761
			Cks2	1164	CDC28 protein kinase regulatory subunit 2										0.393746
			Sap30	8819	Sin3A associated protein 30										0.343633
			Top2a	7153	DNA topoisomerase II alpha										0.357786
			Ube2c	11065	ubiquitin conjugating enzyme E2 C										0.387532
			Ube2s	27338	ubiquitin conjugating enzyme E2 S										0.531467
