# Supplementary material for: Mapping endothelial-cell diversity in cerebral cavernous malformations at single-cell resolution
Source: eLife. 2020 Nov 3;9:e61413. doi: 10.7554/eLife.61413 (PMC7609066; doi:10.7554/eLife.61413)
Supplement: Supplementary file 5. [file elife-61413-supp5.xlsx]

## Sheet: S3A
Supplementary File 5: References supporting the annotation of unique marker genes of cluster 8 set in alphabetical order and summarized in Figure 3A.
Gene name	Specificity (Ccm3 wt)	padj (Ccm3 wt)	Specificity (Ccm3 ko)	padj (Ccm3 ko)	References	Notes
1810037I17Rik	0.380766	9.71e-71	0.413705	1.23e-132		Unknown functions or with function that could not be related to endothelial cells
8430408G22Rik (Depp1)	0.544303	5.25e-86	0.741502	4.52e-132	Salcher et al. Mol Cancer 2017. PMID 28545464
9430020K01Rik (Jcad)	0.499106	4.2e-118	0.483706	1.3e-125	Akashi et al. Biochem Biophys Res Commun 2011. PMID 21884682; Douglas et al. Cardiovasc Res 2019. PMID 31584065; Hara et al. Arterioscler Thromb Vasc Biol 2017. PMID 28705794; Jones et al. Arterioscler Thromb Vasc Biol 2018. PMID 29794114; Gupta. Arterioscler Thromb Vasc Biol 2018. PMID 30354250
Abcb1a	0.572591	1.23e-140	0.514599	7.69e-141	Wanek et al. Mol Pharm 2015. PMID 26202880; AAPS J 2017. PMID 28664465; Morris et al. AAPS J 2017 . PMID 28664465; Mahringer and Fricker. Expert Opin Drug Metab Toxicol 2016. PMID 26998936
Ablim1	0.273003	3.76e-37	0.339299	1.24e-65		Unknown functions or with function that could not be related to endothelial cells
Acvrl1	0.467109	4.72e-97	0.394225	9.49e-83	Goumans and Ten Dijke . Cold Spring Harb Perspect Biol 2018. PMID: 28348036; Alsina-Sanchís et al. Arteriosclerosis, Thrombosis, and Vascular Biology. 2018. PMID: 29449337
Akr1a1	0.333342	1.12e-106	0.388588	8.72e-136	Ruf et al. Clin Invest Med 2009. PMID 19480738; Zhou et al. Nature 2019. PMID: 30487609
Angptl4	0.279979	2.27e-27	0.484294	1.47e-88	Richardson et al. Angiogenesis 2014. PMID: 24563071
App	0.293901	1.43e-39	0.420578	1.99e-99	Azevedo et al. Neuroscience 2017. PMID 28893649; d'Uscio et al. J Cereb Blood Flow Metab 2018. PMID 28959912; McCarthy and Kosman. Front Mol Neurosci 2015. PMID 26236187
Aqp11	0.346517	1.22e-93	0.453716	3.82e-234	Koike et al. Int J Mol Sci 2016. PMID 27258268; Xi et al. J Biol Chem 2018. PMID 30337368
Bmpr2	0.273461	6.73e-34	0.251872	6.62e-38	Hopper et al. Circulation. 2016. PMID: 27045138
Bmx	0.28516	0	0.428797	0	Rajantie et al. Mol Cell Biol 2001. PMID 11416142; Holopainen et al. Cancer Res. 2012. PMID: 22593188; Holopainen et al. Proc Natl Acad Sci U S A 2015. PMID 26430242; Cenni et al. Int Rev Immunol. 2012 . PMID: 22449076
C130074G19Rik	0.32809	1.03e-64	0.353484	9.81e-78		Unknown functions or with function that could not be related to endothelial cells
Card19	0.423427	5.04e-81	0.389019	2.27e-89	Rios et al. J Immunol May 1, 2018, 200 (1 Supplement) 169.18; Woo et al. FEBS Lett 2004. PMID 15637807;
Cd59a	0.376988	2.87e-72	0.42523	3.19e-109	Kinoshit. Semin Hematol 2018. PMID 30032750; Klemann et al. Eur J Paediatr Neurol 2018. PMID 29843966; Tabib et al. Thromb Res 2018. PMID 29929138; Inafuku et al. Front Mol Neurosci 2018. PMID 30174588; Zhang et al. Future Oncol 2018. PMID 29521526; Chen et al. Stem Cell Reports 2017. PMID 28017655
Cdkn1c	0.877386	1.58e-190	0.910018	6.99e-283	Stampone et al. Int J Mol Sci.2018. PMID: 29614816; Müller-Brüsselbach et al. EMBO J 2007. PMID: 17641685
Chd3	0.372247	3.51e-52	0.429352	1.21e-100	Hoffmeister et al. Nucleic Acids Res 2017. PMID: 28977666; Smith et al. Nucleic Acids Res 2018 . PMID: 29733391
Clic4	0.446969	3.64e-93	0.268775	3.38e-43	Wojciak-Stothard et al. Circulation 2014. PMID 24503951; Bohman S, et al. J Biol Chem 2005. PMID 16239224
Cltb	0.595611	9.72e-159	0.421662	1.13e-130	Majeed et al. Nat Commun 2014. PMID 24852344; Chen et al. Dev Cell 2017. PMID 28171750
Crip2	0.477426	2.26e-166	0.411794	2.17e-143	Wei et al. Gene Expr Patterns. 2011. PMID: 21601656
Cyr61 (Ccn1)	0.364211	1.62e-17	0.384058	7.94e-36	Wang et al. Proc Natl Acad Sci U S A 2016. PMID 27671657; Tsou et al. Arthritis Rheumatol 2016. PMID 27482699; Leu et al. J Biol Chem 2002. PMID 12364323; Zhang et al. int J Biochem cell Biol 2013. PMID: 23624342 ; Babic et al. Proc. Natl. Acad. Sci. U.S.A. 1998. PMID 9600969; Fataccioli et al. Hum. Gene Ther 2002. PMID 12215267; Mo et al. Mol. Cell. Biol 2001. PMID 12446788; Mo and Lau. Circ. Re…
Cyyr1	0.409714	2.03e-86	0.403725	4.83e-95		Unknown functions or with function that could not be related to endothelial cells
Edn1	0.332673	6.09e-49	0.382545	4.16e-107	Kurihara et al. Nature 1994. PMID: 8152482; Hidenori Ozeki et al. Mech Dev 2004. PMID: 15110048
Efnb2	0.366622	1.8e-136	0.501991	1.04e-245	Hu et al. Cell 1998 . PMID: 9630219; Salvucci and Tosato Adv Cancer Res. 2012. PMID: 22588055
Egfl8	1.33	8.6e-281	1.64124	0	Wu et al. Anticancer Research 2011. PMID: 21737648; Chim et al. Cytokine Growth Factor Rev 2013. PMID 23611723; Subhan et al. Int J Mol Med 2013. PMID 23877103
Ehd2	0.333843	3.29e-44	0.406027	9.03e-79	Matthaeus et al. PlosOne 2019. PMID: 31600286
Ehd4	0.365205	2.31e-33	0.424068	2.07e-61	George et al. PLoS One 2011. PMID: 21408024; Sharma et al. Traffic 2008. PMID: 18331452
Entpd1	0.385057	2.85e-198	0.482298	1.17e-235	Helenius et al. Am J Physiol Lung Cell Mol Physiol. 2015 PMID: 25820525; Vuerich et al. Front Immunol 2019. PMID: 30941139; Kaniewska-Bednarczuk et al. Cardiovasc Pathol 2018. PMID: 30056298; Pinsky. Trans Am Clin Climatol Assoc 2018. PMID 30166707; Crikis et al. Am J Transplant 2010. PMID: 20840479
Fam129b	0.268609	7.77e-33	0.260224	4.16e-34	Cheng et al. EBioMedicine 2019. PMID 31262713; Lee et al. Cell Cycle 2016. PMID 27111472 ; Zhou et al. Oncotargets Ther 2018. PMID 30498362; Oishi et al. J Biochem 2012. PMID 22977259; Chen et al. J Biol Chem 2011. PMID 21148485
Fam63a (Mindy1)	0.371928	3.78e-66	0.345276	2.6e-80	No reports in EC. Rehman et al. Mol Cell 2016. PMID 27292798; Kristariyanto et al. EMBO Rep 2017. PMID 28082312
Far2	0.255854	4.74e-31	0.277348	2.3e-43	Backer et al. Physiol Genomics 2018. PMID 29652635	Unknown functions or with function that could not be related to endothelial cells
Fbln2	1.1	0	1.36394	0	Chapman et al. Arterioscler Thromb Vasc Biol. 2010. PMID: 19893004; Tsuda. Int J Mol Sci. 2018. PMID: 30227601
Fbln5	1.02	1.02e-188	1.54603	0	Tsuda. Int J Mol Sci. 2018. PMID: 30227601; Chan et al. PLoS One. 2016. PMID: 27304216; Guo et al. Mol Neurobiol. 2016. PMID: 26021746; Albig and Schiemann. DNA Cell Biol. 2004. PMID: 15231070; Sullivan et al. Lab Invest. 2007. PMID: 17607303; Orriols et al. Cardiovasc Res. 2016. PMID: 27089918
Flt1	0.565605	5.05e-212	0.63796	9.42e-232	Hiratsuka et al. Mol Cell Biol 2005. PMID: 15601855; Shibuya. Angiogenesis, 2006. PMID: 17109193
Fzd6	0.259579	1.58e-30	0.469719	4.69e-135	Golan et al J Biol Chem 2004. PMID: 14747478; Corda and Sala. Oncogenesis 2017. PMID: 28737757
Gadd45g	0.265385	2.35e-07	0.305758	1.39e-10	Schäfer et al. Adv Exp Med Biol 2013. PMID 24104472; Zhang et al. Hepatology. PMID 23897841
Gata2	0.57058	1.09e-122	0.595904	1.55e-201	Coma et al Angiogenesis. 2013. PMID: 23892628; Hartmann et al Circulation. 2016. PMID: 27780851
Gatsl3 (Castor1)	0.250763	4.54e-45	0.306463	1.31e-67	Chantranupong et al. Cell 2016. PMID 26972053; Saxton et al. Nature 2016. PMID 27487210; Zheng et al. Int J Mol Sci 2016. PMID 27690010; Li et al. J Clin Invest 2019. PMID 31305263; Ding et al. Cell Physiol Biochem 2018. PMID 29614494; Dodd et al. Oncogene 2015. PMID 24931163
Glul	1.57	0	1.64061	0	Eelen et al. Nature. 2018. PMID: 30158707
Gm694 (Srarp)	1.01	4.88e-283	0.88655	5.93e-244	Naderi. Mol Oncol 2018. PMID 29577611
Gpcpd1	0.535941	3.5e-130	0.645847	1.88e-192		Unknown functions or with function that could not be related to endothelial cells
Gpd2	0.370736	8.93e-54	0.436914	2.61e-113	Langston et al. Nat Immunol 2019. PMID 31384058
Grasp	0.429525	1.47e-93	0.451124	4.73e-106	Venkataraman et al. Cell Biol Int 2012. PMID 22931251
Grrp1	0.317289	8.57e-44	0.389698	1.26e-95	Cunningham et al. Genes Dev 2017 PMID: 28794185	Unknown functions or with function that could not be related to endothelial cells
Gstm7	0.308399	2.99e-29	0.385345	8e-79	No reports in EC. Gstm2 human ortholog.
Guk1	0.472585	1.06e-109	0.48611	6.93e-134	Wolfe et al. Biochem Biophys Res Commun 2019. PMID 31196624; Joehanes et al. Arterioscler Thromb Vasc Biol 2013. PMID: 23539218
Heg1	0.594321	2.26e-152	0.670965	1.02e-247	de Kreuk et al. Elife 2016. PMID: 26780829; Donat et al Elife. 2018 . PMID: 29364115; Zheng et al Stroke. 2014. PMID: 24643410
Hey1	0.727301	5.05e-207	0.845361	0	Davis et al. Sci Rep. 2018. PMID: 30573741; Liu et al. Mol Cancer Ther. 2017. PMID: 28468863; Weber et al. Curr Top Dev Biol. 2014. PMID: 25248480; Brodsly et al. Elife. 2019. PMID: 31310235.
Hip1	0.269016	1.43e-39	0.334229	8.63e-62	Icli et al. FASEB J 2019. PMID: 30668922; Hyun and Ross. Trends Mol Med 2004. PMID 15059611
Htra1	1.01	0	1.06858	0	Klose et al. Oncogene. 2018. PMID: 29713059
Igfbp3	1.08	8.53e-73	0.969021	1.24e-184	Huang and Huang. J Cell Biochem 2005. PMID 16088940; Afzal et al. Microvasc Res 2007 - Review. PMID 17585951
Isg15	0.329825	2.26e-20	0.468507	1.92e-50	Perng and Lenschow. Nat Rev Microbiol 2018 - Review. PMID 29769653; Cancer Lett 2018 - Review. PMID 30213559
Kitl	0.447058	9.38e-88	0.305834	1.2e-48	Pietras. Blood 2018. PMID 29773542; Buono et al. Nat Commun 2018. PMID 30410062
Lamb2	0.387179	3.83e-74	0.396166	4.25e-96	Biswas et al. Am J Pathol 2017. PMID 28697326; Wagner et al. Arterioscler Thromb Vasc Biol 2018. PMID 29599141; Biswas et al. Am J Pathol 2017. PMID 28697326; Funk et al. Matrix Biol 2018 - Review. PMID 29673759
Lima1	0.602595	3.07e-187	0.639938	6.27e-208	Chervin-Pétinot et al J Biol Chem. 2012. PMID: 22194609; Lim Nat Rev Cardiol. 2018. PMID: 29941963; Ohashi et al. Cancer Lett 2017. PMID: 28093207; Nie et al. Nat Commun.2015. PMID: 25569716
Lims2	0.478908	3.79e-200	0.456135	1.03e-202	Kim et al. Biochem Biophys Res Commun 2006. PMID 16959213; Park et al. Int J Cancer 2015. PMID 25346044; Xu et al. Gene. 2016. PMID 27590440; Legate et al. Nat Rev Mol Cell Biol 2006. PMID 16493410.
Lmo7	0.37862	6.09e-191	0.335098	1.91e-142	Xie et al. Circulation. 2019. PMID: 30586711
Ltbp4	0.946629	0	1.0551	0	Bulymann-Mellin et al. Am J Physiol Lung Cell Mol Physiol. 2017. PMID: 28684544; Koli et al. J Cell Sci. 2001. PMID: 11683420; Todorovic and Rifkin. J Cell Biochem. 2012. PMID: 22223425; Rifkin et al. Matrix Biol. 2018. PMID: 29217273
Mal	0.537714	1.82e-150	0.703861	0	Breuer J, et al. J Neuroinflammation 2018. PMID 30134924	Unknown functions or with function that could not be related to endothelial cells
Mall	0.357938	4.64e-94	0.316007	1.11e-49	Wang et al. Oncotarget 2016. PMID: 26992238	Unknown functions or with function that could not be related to endothelial cells
Mapk3 (Erk1)	0.46041	3.12e-114	0.487708	5.78e-151	Ciccarelli and Giustetto. Neuropharm.2014. PMID: 24486378
Mast4	0.313511	1.79e-37	0.442102	3.76e-106	Garland et al. Brain Res 2008. PMID 18206861
Mcfd2	0.35341	2.65e-54	0.394073	7.11e-95	Spreafico and Peyvandi. Semin Thromb Hemost 2009 - Review. PMID 19598067
Mecom	0.31596	3.08e-46	0.523139	3.68e-129	Garside et al. Development. 142. 2015. PMID: 26525672; Liu and Tirado. J Assoc Genet Technol 2019. PMID 31554743; Yuasa et al. The EMBO Journal. 2005. PMID 15889140
Msx1	0.360671	0	0.417023	0	Wirring and Yutzey. Arterioscler Thromb Vasc Biol. 2014 PMID: 24665126 ; Lopes et al. Biol Open. 2012. PMID: 23213427; Vandersmissen et al. J Cell Biol. 2015. PMID: 26391659
Nebl	0.943933	0	1.1072	0	Hernandez et al. Mol Biol Cell. 2016. PMID: 27733623; Purevjav et al. J Am Coll Cardiol. 2010. PMID: 20951326
Ninj1	0.318036	3.81e-56	0.299826	2.24e-50	Lee et al. Mol Cells. 2010. PMID: 20119872; Minoshima et al. Arterioscler Thromb Vasc Biol 2018. PMID 30354207; Bae et al. J Cell Biochem 2017. PMID 28067406; Matsuki et al. Circ J 2015. PMID 25766274; Lee et al. Mol Cells 2010 - Review. PMID 20119872
Notch1	0.299961	1.16e-38	0.458165	2.46e-118	Park et al. Stem Cell Res Ther. 2018. PMID: 30021650; Koenig et al. JCI Insight 2017. PMID 29093270
Notch4	0.296434	7.11e-46	0.359791	3.83e-78	Villa et al. Mech Dev. 2001. PMID: 11578869; Duarte et al. Genes Dev. 2004. PMID: 15466159; James et al. Biochim Biophys Acta. 2014 PMID: 24667410
Nxn	0.295034	3.62e-44	0.331498	1.18e-75	Bahn et al. J Lipid Res 2015. PMID 25548260; Kneeshaw et al. Proc Natl Acad Sci U S A 2017. PMID 28724723; Funato et al. Nat Cell Biol. 2006. PMID: 16604061; Funato and Miki. Antioxid Redox Signal 2007 - Review. PMID 17567240; Bhattacharyya et al. Nutr Cancer 2014. PMID 24328990; Free Radic Res 2010 - Review. PMID 20187711; Rharass et al. J Biol Chem 2014. PMID 25124032; Schöttker et al. Genes Ch…
Ocln	0.280786	6.45e-33	0.388705	2.95e-80	Cong and Kong Cell Signal 66 2020. PMID: 31770579
Ormdl3	0.275328	2.64e-32	0.40563	1.53e-83	Ma et al. Sci Rep. 2015 PMID: 26603569; Ma et al. Int J Rheum Dis. 2018 - Review. PMID 29879314; Cheng et al. Int Immunopharmacol 2019. PMID 31536903
Parvb	0.256808	1.13e-30	0.352255	3.05e-73	Pitter et al. Arterioscler Thromb Vasc Biol 2018. PMID 29567677
Pcp4l1	0.684948	7.75e-193	0.62107	0	Bulfone et al. Gene Expr Patterns 2004. PMID 15053978	Unknown functions or with function that could not be related to endothelial cells
Pdxk	0.362016	1.95e-89	0.339029	1.41e-85	Galluzzi et al. Oncogene. 2013. PMID. 23334322; Chelban et al. Ann Neurol. 2019 . PMID. 31187503
Pkig	0.299696	2.91e-42	0.327711	7.3e-55	Lum et al. Am J Physiol Cell Physiol 2002. PMID: 11742798
Plpp1 (Lpp1)	0.508701	2.54e-77	0.606981	6.03e-148	Pilquil et al. Biochem Soc Trans 2001. PMID. 11709082; Rajkumar et al. J Neurochem 2018. PMID. 29023711; Zhao et al. J Biol Chem 2007. PMID. 17379599
Podxl (podocalyxin)	0.478778	1.01e-123	0.397237	3.08e-89	Horrillo et al. Eur J Cell Biol 2016. PMID 27289182; Cait et al. Proc Natl Acad Sci U S A 2019. PMID 30787191
Ppt2	0.564667	1.25e-56	0.685323	3.67e-114	Yuan et al. J Cancer 2020. PMID 31956361; Gupta et al. Proc Natl Acad Sci U S A 2003. PMID 14528005; Gupta et al. Proc Natl Acad Sci U S A 2001. PMID 11717424
Pradc1	0.278302	5.15e-73	0.344346	1.21e-127	Rodriguez FASEB J. 2019. PMID. 31689374
Prex2	0.33458	8.67e-51	0.462833	1.27e-83	Hernández-García et al. Vascul Pharmacol 2015. PMID 26471833; Abiko et al. J Cell Sci 2015. PMID 25795300; Li et al. Prostaglandins Other Lipid Mediat 2005. PMID 15967165; Welch. Small GTPases. 2015 - Review. PMID 25961466; Hodakoski et al. Methods. 2015 - Review. PMID 25462559
Prss23	0.326828	1.28e-74	0.460927	1.09e-183	Chen et al. Cardiovasc Res 2013. PMID. 23213106; Bayoumi et al. Cardiovasc Res. 2017. PMID: 29016706
Ptprb	0.625382	4.39e-165	0.852591	5.35e-257	Hayashi M, et al. Nat Commun 2013. PMID 23575676
Ptprg	0.314334	8.9e-51	0.300602	7.74e-51	Liu et al. Oncotarget 2016. PMID 27602768; Kostas et al. Mol Cell Proteomics 2018. PMID 29371290
Rbms1	0.266697	9.21e-47	0.289306	3.24e-67	Negishi et al. Oncogene. 1994. PMID: 8134115;Yin et al. Mol Endocrinol 2012. PMID 22593182; Fujimoto et al. Gene. 1998 PMID: 9729119; Doeppner et al. Brain 2012. PMID: 23169919
Rgs3	0.351685	3.19e-68	0.451597	4.89e-120	Anger et al. Exp Mol Pathol. 2008. PMID: 18977218; Xie et al. AAPS J 2016 - Review. PMID 26597290; Xu et al. Cell Biochem Funct 2017. PMID 28845525; Liu et al. J Cell Biochem 2014. PMID 24375609; Geng et al. Nat Commun 2018. PMID 30006548; Wang et al. Anticancer Drugs 2017. PMID 27754994
S1pr1	0.293682	2.67e-47	0.33701	2.18e-57	Vestri et al. Front Pharmacol 2017 - Review. PMID 28626422; Rostami et el. Mol Diagn Ther 2019 - Review. PMID 31115798
Sdpr (Cavin2)	0.478122	5.8e-94	0.548185	4.1e-121	Ozturk et al. Proc Natl Acad Sci U S A 2016. PMID 26739564; Wang et al. Oncol Rep 2019. PMID 31322248; Tian et al. Cancer Sci 2016. PMID 26749136; Hansen et al. Nat Cell Biol 2009. PMID 19525939; Nassar and Parat. Int Rev Cell Mol Biol 2015 - Review. PMID 26614875; Boopathy et al. J Biol Chem. 2017. PMID: 28912276
Sema3c	0.421798	2.81e-137	0.290527	5.99e-122	Yang . EMBO Mol Med. 2015. PMID: 26194913
Sema3g	0.619041	0	0.805745	0	Kutschera Arterioscler Thromb Vasc Biol. 2011 PMID: 20947821
Sema7a	0.516721	4.59e-94	0.478051	4.9e-126	Roth PLoS One. 2016 . PMID: 26752048; Hu Arterioscler Thromb Vasc Biol. 2018 PMID: 29269512
Serpinf1	0.391271	1.51e-219	0.346887	0	Xu Oncotarget 2017 PMID: 29207620; Maiti Int J Oncol. 2019. PMID: 31059004
Sgms1	0.639729	2.1e-118	0.739478	2.26e-233	Filippenkov et al. Gene, 654, 14-22 2018. PMID: 29454087
She	0.281741	1.08e-38	0.253118	1.38e-24		Unknown functions or with function that could not be related to endothelial cells
Slc38a2	0.32115	6.74e-61	0.461604	1.88e-115	Neuropharmacology 2019 - Review. PMID 31574264
Slc52a3	0.291166	3.86e-45	0.352762	6.26e-101	O'Callaghan et al. Metab Dis 2019 - Review. PMID 30793323; Bosch et al. Orphanet J Rare Dis 2012 - Review. PMID 23107375
Slc9a3r2	0.7238	7.62e-216	0.608201	2.42e-215	Wallgard et al. Arterioscler Thromb Vasc Biol 2008. PMID 18483404; Padilla et al. J Appl Physiol. 2014. PMID: 24408995
Slco1a4	0.801179	4.52e-286	1.01136	0	Abdullahi. Mol Pharmacol. 2018. PMID: 30262595; Thomson et al. J Cereb Blood Flow metab. 2014. PMID: 24473481
Smad7	0.296177	1.17e-43	0.325535	1.06e-76	Troncone et al. Front Immunol. 2018. PMID: 29973939; Nakao et al. Nature 1997. PMID: 9335507
Smco4	0.374443	3.35e-68	0.361179	2.11e-68		Unknown functions or with function that could not be related to endothelial cells
Smpdl3a	0.687676	1.73e-145	0.720803	4.29e-200	Gorelik et al. J Biol Chem 2016. PMID 26792860
Sorbs2	0.444153	1e-100	0.456185	1.03e-122	Martin et al. EMBO J. 2013 PMID: 23955003; Zhao et al. Genome Biol 2018. PMID 29548303; Han et al. Liver Int 2019. PMID 31365778; Backsch et al. Carcinogenesis 2011. PMID 21602178; Fredriksson-Lidman et al. PLoS One 2017. PMID 28961272; Anekal et al. J Biol Chem 2015. PMID 25429109
Sox13	0.343151	1.66e-83	0.400474	4.25e-113	Marfil et al. J Biol Chem. 2010. PMID: 20028982; Melichar et al. Science 2007. PMID: 17218525; Roose et al. Nucleic Acids Res. 1998. PMID: 9421502
Sox17	0.78088	2.42e-150	0.770736	8.57e-203	Liu Nat Commun. 2019 . PMID: 31073164; Schachterle . Nat Commun. 2017 . PMID: 28091527; Corada Circ Res. 2019 . PMID: 30591003
Sox18	0.733182	1.75e-156	0.755129	8.4e-208	Young J Natl Cancer Inst. 2006. PMID: 16882943; Kanki Nucleic Acids Res. 2017 . PMID: 28334937; Roudnicky Sci Rep. 2020 . PMID: 32127614
Srgn	0.537198	2.76e-97	0.580234	3.19e-155	Zhang et al. Oncogenesis 2017. PMID 28692037; Xu et al. Cell Physiol Biochem 2018. PMID 30121667; Scuruchi et al. Arch Biochem Biophys 2019. PMID 31145901
Tmem100 (Etfa)	0.914112	0	1.16883	0	Somekawa et al. Proc Natl Acad Sci U S A. 2012. PMID: 22783020; Moon et al. Cardiovasc Res. 2015. PMID: 25538155;
Tmem51	0.345688	6.65e-67	0.471418	1.4e-145	Sung et al. Hum Mol Genet 2019. PMID 31127295	Unknown functions or with function that could not be related to endothelial cells
Trim47	0.497799	2.19e-121	0.524265	4.37e-144	Liang et al. J Exp Clin Cancer Res 2019. PMID 30979374; Hao et al. Biochem Biophys Res Commun 2019. PMID 31178138
Utrn	0.304956	4.23e-38	0.453325	1.48e-103	Weir et al. J Biol Chem 2002. PMID 12235137
Vegfc	0.564729	0	0.605598	5.23e-228	Tammela et al. Nat Cell Biol 2011. PMID 21909098; Tammela et al. Cardiovasc Res 2005. PMID 15664381
