# Supplementary material for: Mapping endothelial-cell diversity in cerebral cavernous malformations at single-cell resolution
Source: eLife. 2020 Nov 3;9:e61413. doi: 10.7554/eLife.61413 (PMC7609066; doi:10.7554/eLife.61413)
Supplement: Supplementary file 6. [file elife-61413-supp6.xlsx]

## Sheet: S3B
Supplementary File 6: references supporting the annotation of DEGs (Pdcd10 ko vs Pdcd10 wt) of cluster 8 set in alphabetical order and summarized in Figure 3D.
Gene name	average logFC (Pdcd10 ko vs Pdcd10 wt)	padj	References
Fbln5	0.51906	0.00356738	Chan et al. PLoS One 2016 PMID: 27304216, Guo et al. Mol Neurobiol. 2016 PMID: 26021746, Tsuda Int J Mol Sci. 2018 PMID: 30227601, Sullivan et al Lab Invest. 2007 PMID: 17607303, Orriols et al Cardiovasc Res. 2016 PMID: 27089918
Stmn2	0.409657	2.10602e-05	http://betsholtzlab.org/VascularSingleCells/database.html
Emp2	0.278972	0.099048	Gordon et al Oncogene. 2013 PMID: 23334331
Fbln2	0.277785	0.00495247	Chapman et al Arterioscler Thromb Vasc Biol. 2010 PMID: 19893004, Tsuda Int J Mol Sci. 2018 PMID: 30227601
Tmem100	0.269582	0.000489274	Somekawa et al Proc Natl Acad Sci U S A. 2012 PMID: 22783020, Moon et al Cardiovasc Res. 2015 PMID: 25538155
Nebl	0.255186	225.046	Purevjav et al J Am Coll Cardiol. 2010 PMID: 20951326
Slco2a1	-0.294514	8.48837	Liu et al PLoS One. 2015 PMID: 26230411, Syeda et al Am J Pathol. 2012 PMID: 22609345
