# Supplementary material for: Mapping endothelial-cell diversity in cerebral cavernous malformations at single-cell resolution
Source: eLife. 2020 Nov 3;9:e61413. doi: 10.7554/eLife.61413 (PMC7609066; doi:10.7554/eLife.61413)
Supplement: Supplementary file 7. — The differentially expressed genes with avg_logFC > 0 in both genotypes and minimump_p_val < 0.05 are considered as canonical markers of clusters. [file elife-61413-supp7.xlsx]

## Sheet: Supplementary File 7
Supplementary File 7: Canonical marker genes of clusters.
The differentially expressed genes with avg_logFC>0 in both genotypes and minimump_p_val<0.05 are considered as canonical markers of clusters.
gene_name	P8WT_p_val	P8WT_avg_logFC	P8WT_pct.1	P8WT_pct.2	P8WT_p_val_adj	P8CCM3KO_p_val	P8CCM3KO_avg_logFC	P8CCM3KO_pct.1	P8CCM3KO_pct.2	P8CCM3KO_p_val_adj	max_pval	minimump_p_val	cluster
Bsg	0	0.444571	1	1	0	0	0.454543	1	0.999	0	0	0	0
Itm2a	0	0.438535	0.999	0.985	0	8.50276e-210	0.460962	0.99	0.97	2.3806e-205	8.50276e-210	0	0
Cldn5	0	0.426621	1	0.998	0	0	0.455491	1	0.997	0	0	0	0
Ramp2	0	0.385989	1	0.986	0	7.39162e-261	0.316244	1	0.984	2.0695e-256	7.39162e-261	0	0
Mfsd2a	3.60136e-282	0.469285	0.978	0.932	1.00831e-277	2.5132e-170	0.481634	0.946	0.859	7.03645e-166	2.5132e-170	7.20272e-282	0
Slc16a1	2.09212e-281	0.531649	0.978	0.909	5.85751e-277	7.05985e-150	0.548603	0.909	0.791	1.97662e-145	7.05985e-150	4.18424e-281	0
Slc3a2	1.95086e-277	0.42382	0.996	0.992	5.46201e-273	1.61452e-182	0.408133	0.989	0.977	4.52033e-178	1.61452e-182	3.90172e-277	0
Slc7a5	4.60145e-257	0.410133	0.988	0.964	1.28831e-252	3.32202e-138	0.379017	0.974	0.934	9.30099e-134	3.32202e-138	9.2029e-257	0
Esam	5.13348e-255	0.307133	0.999	0.991	1.43727e-250	1.1707e-173	0.281161	0.998	0.982	3.27773e-169	1.1707e-173	1.0267e-254	0
Slc38a5	1.11855e-254	0.473212	0.979	0.921	3.13172e-250	6.34214e-211	0.488804	0.952	0.872	1.77567e-206	6.34214e-211	2.2371e-254	0
Vwa1	5.91362e-251	0.324105	0.999	0.981	1.6557e-246	5.63753e-136	0.30005	0.997	0.971	1.5784e-131	5.63753e-136	1.18272e-250	0
Slco1c1	6.1395e-247	0.453751	0.972	0.921	1.71894e-242	1.07353e-156	0.472262	0.906	0.787	3.00566e-152	1.07353e-156	1.2279e-246	0
Tsc22d1	1.66507e-239	0.341594	1	0.994	4.66185e-235	5.28101e-203	0.41761	0.999	0.989	1.47858e-198	5.28101e-203	3.33013e-239	0
Slc2a1	5.73635e-235	0.461453	0.98	0.951	1.60606e-230	1.521e-142	0.36295	0.988	0.967	4.2585e-138	1.521e-142	1.14727e-234	0
Mpzl1	5.37115e-227	0.285266	0.986	0.974	1.50381e-222	2.17972e-157	0.292615	0.981	0.958	6.10279e-153	2.17972e-157	1.07423e-226	0
Csrp2	1.62271e-224	0.291724	0.996	0.982	4.54326e-220	7.66146e-179	0.321111	0.989	0.962	2.14506e-174	7.66146e-179	3.24542e-224	0
Kank3	5.75438e-221	0.307941	0.972	0.944	1.61111e-216	2.35045e-128	0.264685	0.969	0.937	6.5808e-124	2.35045e-128	1.15088e-220	0
Tdrp	1.5005e-217	0.350413	0.946	0.905	4.20109e-213	8.63203e-174	0.357928	0.907	0.85	2.4168e-169	8.63203e-174	3.00099e-217	0
Lsr	1.25033e-210	0.318204	0.976	0.938	3.50068e-206	5.55989e-175	0.279166	0.983	0.952	1.55666e-170	5.55989e-175	2.50066e-210	0
AU021092	5.49575e-205	0.360232	0.948	0.912	1.5387e-200	4.62135e-94	0.289078	0.891	0.867	1.29389e-89	4.62135e-94	1.09915e-204	0
Slc39a8	3.23387e-204	0.304332	0.958	0.935	9.05419e-200	1.86515e-179	0.385336	0.916	0.854	5.22205e-175	1.86515e-179	6.46774e-204	0
Pglyrp1	1.87862e-189	0.361331	0.994	0.965	5.25976e-185	3.74758e-163	0.398139	0.993	0.967	1.04925e-158	3.74758e-163	3.75724e-189	0
Lmo2	7.03317e-189	0.307021	0.986	0.962	1.96915e-184	1.22186e-143	0.324387	0.971	0.941	3.42096e-139	1.22186e-143	1.40663e-188	0
Slc40a1	3.14436e-186	0.316592	0.948	0.917	8.80358e-182	7.93845e-155	0.348285	0.909	0.838	2.22261e-150	7.93845e-155	6.28872e-186	0
Slc31a1	8.5173e-184	0.324541	0.914	0.897	2.38467e-179	3.68298e-120	0.282363	0.908	0.893	1.03116e-115	3.68298e-120	1.70346e-183	0
Tfrc	3.3945e-176	0.340908	0.971	0.928	9.50393e-172	7.49165e-163	0.385889	0.962	0.888	2.09751e-158	7.49165e-163	6.789e-176	0
Spock2	4.4223e-174	0.32941	0.992	0.964	1.23815e-169	2.40812e-127	0.385283	0.944	0.865	6.74226e-123	2.40812e-127	8.84459e-174	0
Sepp1	7.72799e-174	0.423629	0.997	0.986	2.16368e-169	1.67861e-61	0.306355	0.963	0.948	4.69977e-57	1.67861e-61	1.5456e-173	0
Grap	1.61257e-169	0.269385	0.961	0.944	4.51486e-165	5.83336e-130	0.282417	0.942	0.919	1.63322e-125	5.83336e-130	3.22513e-169	0
Tsc22d3	4.18984e-158	0.393318	0.932	0.908	1.17307e-153	6.08184e-92	0.343078	0.892	0.874	1.70279e-87	6.08184e-92	8.37968e-158	0
St3gal6	5.08703e-144	0.286436	0.882	0.856	1.42427e-139	1.25508e-120	0.298861	0.867	0.812	3.51398e-116	1.25508e-120	1.01741e-143	0
Gatm	2.21721e-141	0.283084	0.95	0.917	6.20775e-137	9.27812e-110	0.28811	0.892	0.811	2.59769e-105	9.27812e-110	4.43442e-141	0
Arl4a	3.63679e-130	0.28894	0.968	0.944	1.01823e-125	1.53862e-96	0.275041	0.953	0.938	4.30784e-92	1.53862e-96	7.27358e-130	0
Ctla2a	2.00501e-113	0.310136	0.999	0.982	5.61362e-109	1.28303e-124	0.369883	0.998	0.977	3.59224e-120	2.00501e-113	2.56607e-124	0
Pltp	1.84731e-115	0.274101	0.977	0.943	5.1721e-111	2.27646e-87	0.255244	0.958	0.928	6.37364e-83	2.27646e-87	3.69462e-115	0
Isyna1	5.62842e-115	0.30986	0.823	0.784	1.57585e-110	3.78454e-108	0.388868	0.79	0.724	1.05959e-103	3.78454e-108	1.12568e-114	0
Nostrin	4.07615e-106	0.251804	0.901	0.892	1.14124e-101	1.81533e-114	0.270319	0.905	0.878	5.08255e-110	4.07615e-106	3.63065e-114	0
Aplnr	2.25576e-114	0.336626	0.893	0.826	6.31567e-110	5.67345e-80	0.294751	0.862	0.808	1.58845e-75	5.67345e-80	4.51151e-114	0
Ecm1	6.46976e-69	0.25696	0.79	0.767	1.8114e-64	1.26307e-107	0.318176	0.817	0.778	3.53634e-103	6.46976e-69	2.52614e-107	0
Wfdc1	6.6603e-68	0.258474	0.728	0.655	1.86475e-63	4.70867e-99	0.313487	0.912	0.848	1.31833e-94	6.6603e-68	9.41734e-99	0
Hspb1	1.08859e-77	0.336182	0.86	0.829	3.04783e-73	3.52251e-70	0.294856	0.94	0.911	9.86233e-66	3.52251e-70	2.17718e-77	0
Abhd2	1.97751e-22	0.289777	0.835	0.851	5.53664e-18	5.00233e-27	0.261804	0.842	0.85	1.40055e-22	1.97751e-22	1.00047e-26	0
Igfbpl1	0	1.72484	0.403	0.004	0	0	1.55554	0.31	0.005	0	0	0	10
Neurod1	0	1.68276	0.403	0.006	0	1.56936e-252	1.21734	0.207	0.004	4.39389e-248	1.56936e-252	0	10
Ppp2r2c	0	1.2832	0.351	0.003	0	0	1.01265	0.264	0.003	0	0	0	10
Bex2	0	1.24869	0.519	0.008	0	0	0.968369	0.603	0.011	0	0	0	10
Pax6	0	1.17528	0.532	0.007	0	0	1.10446	0.494	0.008	0	0	0	10
Gpm6a	0	1.13973	0.831	0.027	0	0	0.970044	0.661	0.03	0	0	0	10
Insm1	0	1.1051	0.377	0.002	0	0	0.804796	0.253	0.001	0	0	0	10
Gm3764	0	1.10334	0.532	0.009	0	0	0.824644	0.529	0.009	0	0	0	10
Dclk1	0	1.08085	0.714	0.005	0	0	1.25627	0.701	0.008	0	0	0	10
Pantr1	0	1.01484	0.519	0.009	0	0	0.836031	0.621	0.018	0	0	0	10
Ncan	0	0.948495	0.558	0.01	0	0	0.904714	0.529	0.018	0	0	0	10
Ttc9b	0	0.882226	0.455	0.003	0	0	0.423712	0.264	0.004	0	0	0	10
Uncx	0	0.862445	0.325	0.002	0	4.6027e-307	0.526654	0.178	0.002	1.28866e-302	4.6027e-307	0	10
Ina	0	0.825287	0.299	0.001	0	0	0.37246	0.201	0.002	0	0	0	10
Scg3	0	0.805774	0.61	0.003	0	0	0.521378	0.483	0.003	0	0	0	10
Apba2	0	0.773153	0.429	0.005	0	0	0.538799	0.368	0.004	0	0	0	10
E130114P18Rik	0	0.736759	0.519	0.002	0	0	0.691071	0.489	0.002	0	0	0	10
Gm17750	0	0.724707	0.584	0.003	0	0	0.881495	0.54	0.006	0	0	0	10
Ttyh1	0	0.704483	0.506	0.011	0	0	0.91016	0.534	0.021	0	0	0	10
Luzp2	0	0.688975	0.481	0.004	0	0	0.862004	0.534	0.007	0	0	0	10
Lhx1	0	0.686778	0.286	0.002	0	0	0.636844	0.224	0.002	0	0	0	10
Ppp2r2b	0	0.662819	0.338	0.003	0	0	0.537726	0.391	0.003	0	0	0	10
Sept3	0	0.66046	0.403	0.002	0	0	0.412271	0.333	0.002	0	0	0	10
Barhl1	0	0.637959	0.286	0.002	0	0	0.654253	0.195	0.001	0	0	0	10
Nrn1	0	0.607844	0.351	0.004	0	1.78434e-255	0.454779	0.184	0.003	4.99579e-251	1.78434e-255	0	10
Sox2	0	0.601968	0.403	0.003	0	0	0.701253	0.517	0.005	0	0	0	10
Nsg2	0	0.592268	0.39	0.003	0	0	0.468127	0.391	0.003	0	0	0	10
Gpr37l1	0	0.586255	0.351	0.003	0	0	0.609116	0.489	0.003	0	0	0	10
Nhlh2	0	0.54806	0.247	0.002	0	0	0.44094	0.201	0.002	0	0	0	10
Meis1	0	0.545729	0.377	0.005	0	0	0.425911	0.328	0.007	0	0	0	10
Mab21l1	0	0.529877	0.26	0.001	0	0	0.458416	0.19	0.001	0	0	0	10
Btbd17	0	0.524221	0.442	0.003	0	0	0.385532	0.247	0.003	0	0	0	10
Timp4	0	0.511664	0.403	0.005	0	2.24383e-284	0.408935	0.305	0.009	6.28228e-280	2.24383e-284	0	10
Fut9	0	0.500219	0.442	0.001	0	0	0.348319	0.328	0.002	0	0	0	10
Ntrk2	0	0.475021	0.481	0.007	0	0	0.949487	0.534	0.01	0	0	0	10
Slc6a1	0	0.474371	0.364	0.003	0	0	0.35876	0.397	0.003	0	0	0	10
Scg5	0	0.452219	0.416	0.007	0	0	0.319527	0.282	0.006	0	0	0	10
St18	0	0.437357	0.208	0	0	0	0.255454	0.138	0.001	0	0	0	10
Homer2	0	0.436777	0.312	0.003	0	0	0.324168	0.276	0.004	0	0	0	10
C130071C03Rik	0	0.434126	0.39	0.002	0	0	0.429889	0.345	0.003	0	0	0	10
Barhl2	0	0.432675	0.182	0.001	0	0	0.30345	0.138	0	0	0	0	10
Pou3f2	0	0.419589	0.351	0.002	0	0	0.301542	0.282	0.001	0	0	0	10
Scrg1	0	0.398206	0.325	0.003	0	1.34978e-215	0.373901	0.213	0.006	3.77911e-211	1.34978e-215	0	10
Mlc1	0	0.387101	0.351	0.005	0	0	0.647159	0.46	0.009	0	0	0	10
Lhx1os	0	0.365512	0.247	0.002	0	0	0.428636	0.167	0.001	0	0	0	10
Dlgap1	0	0.343668	0.338	0.002	0	0	0.396431	0.408	0.003	0	0	0	10
Ctnnd2	0	0.302982	0.364	0.003	0	0	0.369981	0.397	0.009	0	0	0	10
Dcx	3.6577e-304	0.641368	0.273	0.003	1.02408e-299	0	0.453088	0.213	0.002	0	3.6577e-304	0	10
Mfap4	9.48869e-304	1.58746	0.351	0.005	2.65664e-299	0	1.25741	0.27	0.004	0	9.48869e-304	0	10
Msi1	1.47925e-302	0.460777	0.312	0.004	4.14162e-298	0	0.271583	0.351	0.003	0	1.47925e-302	0	10
Kcne1l	1.10152e-294	0.360151	0.39	0.007	3.08403e-290	0	0.446267	0.425	0.007	0	1.10152e-294	0	10
Gria2	1.21154e-293	0.922378	0.519	0.013	3.39208e-289	0	0.671878	0.42	0.013	0	1.21154e-293	0	10
Mmd2	3.06441e-287	0.810574	0.468	0.01	8.57974e-283	0	1.15712	0.655	0.018	0	3.06441e-287	0	10
Dtna	2.64125e-286	0.331647	0.247	0.002	7.39498e-282	0	0.517074	0.397	0.005	0	2.64125e-286	0	10
Elavl3	2.85859e-270	1.14983	0.403	0.008	8.00347e-266	0	1.01504	0.368	0.008	0	2.85859e-270	0	10
Amer2	1.56048e-264	0.410372	0.299	0.004	4.36903e-260	0	0.366702	0.293	0.004	0	1.56048e-264	0	10
Ptprz1	8.86027e-262	1.31002	0.506	0.014	2.4807e-257	0	1.53507	0.69	0.017	0	8.86027e-262	0	10
C1ql1	1.04631e-260	0.65607	0.273	0.003	2.92945e-256	0	0.544532	0.27	0.005	0	1.04631e-260	0	10
6330403K07Rik	9.88556e-254	0.550423	0.286	0.004	2.76776e-249	0	0.487597	0.42	0.011	0	9.88556e-254	0	10
Rtn1	7.39938e-253	1.99617	0.675	0.027	2.07168e-248	0	1.57414	0.684	0.038	0	7.39938e-253	0	10
Fam171b	3.94596e-251	0.481841	0.494	0.013	1.10479e-246	0	0.443371	0.379	0.012	0	3.94596e-251	0	10
Kcnj10	8.0411e-243	0.289935	0.221	0.002	2.25135e-238	0	0.264203	0.368	0.006	0	8.0411e-243	0	10
Stmn3	1.57538e-241	1.22918	0.519	0.016	4.41075e-237	0	0.617632	0.42	0.016	0	1.57538e-241	0	10
Sfrp1	2.0579e-234	1.00284	0.273	0.004	5.76172e-230	0	0.938846	0.351	0.005	0	2.0579e-234	0	10
Nrxn1	3.48589e-231	0.726439	0.481	0.014	9.75978e-227	0	0.745816	0.546	0.013	0	3.48589e-231	0	10
Phyhipl	2.02199e-222	0.288011	0.247	0.003	5.66117e-218	0	0.364881	0.351	0.004	0	2.02199e-222	0	10
Kif1a	6.20247e-212	0.303758	0.26	0.004	1.73657e-207	0	0.474593	0.42	0.007	0	6.20247e-212	0	10
Slc6a11	9.23861e-212	0.482867	0.26	0.004	2.58662e-207	0	0.510374	0.385	0.007	0	9.23861e-212	0	10
Slc1a2	4.35772e-209	1.53692	0.61	0.027	1.22008e-204	0	1.70526	0.718	0.052	0	4.35772e-209	0	10
Aqp4	3.41706e-207	0.581705	0.325	0.007	9.56707e-203	0	1.45952	0.58	0.006	0	3.41706e-207	0	10
Pcdh9	2.90422e-192	0.379535	0.286	0.006	8.13122e-188	0	0.253147	0.305	0.005	0	2.90422e-192	0	10
Neurod2	1.64752e-187	0.369806	0.169	0.002	4.61273e-183	0	0.406116	0.213	0.001	0	1.64752e-187	0	10
Kif5c	3.24644e-186	0.376329	0.247	0.004	9.08939e-182	0	0.484732	0.362	0.005	0	3.24644e-186	0	10
Ramp1	3.29864e-186	0.351088	0.39	0.011	9.23553e-182	0	0.752697	0.54	0.023	0	3.29864e-186	0	10
Hes5	2.61253e-185	0.278062	0.26	0.005	7.31457e-181	0	0.766223	0.397	0.009	0	2.61253e-185	0	10
Rnf208	6.46563e-127	0.280345	0.195	0.004	1.81025e-122	0	0.267734	0.259	0.003	0	6.46563e-127	0	10
Bcan	7.70366e-121	0.909637	0.299	0.01	2.15687e-116	0	0.731486	0.448	0.011	0	7.70366e-121	0	10
Trim2	1.00785e-110	0.477274	0.299	0.011	2.82179e-106	0	0.469745	0.402	0.01	0	1.00785e-110	0	10
Cadm2	6.98606e-102	0.281416	0.156	0.003	1.95596e-97	0	0.326797	0.218	0.002	0	6.98606e-102	0	10
Pcsk1n	1.26448e-101	0.264107	0.247	0.008	3.54029e-97	0	0.414501	0.471	0.016	0	1.26448e-101	0	10
Slc4a4	1.86041e-99	0.622319	0.351	0.018	5.20879e-95	0	0.832831	0.557	0.022	0	1.86041e-99	0	10
Aldoc	2.26755e-97	0.917076	0.39	0.023	6.3487e-93	0	1.18977	0.626	0.038	0	2.26755e-97	0	10
Nfasc	5.35493e-64	0.595342	0.104	0.002	1.49927e-59	0	0.549896	0.236	0.004	0	5.35493e-64	0	10
Ank3	1.49303e-176	0.674081	0.377	0.011	4.18019e-172	2.10137e-306	0.541192	0.351	0.011	5.88342e-302	1.49303e-176	4.20274e-306	10
Bex4	1.37362e-148	0.52991	0.338	0.011	3.84587e-144	1.76801e-290	0.560196	0.471	0.023	4.95006e-286	1.37362e-148	3.53601e-290	10
Snap25	1.9296e-209	0.414499	0.221	0.003	5.4025e-205	7.7271e-287	0.310857	0.184	0.003	2.16343e-282	1.9296e-209	1.54542e-286	10
Gm2694	4.60675e-277	0.642692	0.273	0.003	1.2898e-272	7.07276e-144	0.328666	0.149	0.004	1.98023e-139	7.07276e-144	9.2135e-277	10
Tubb3	1.13699e-273	1.12942	0.429	0.009	3.18335e-269	5.65766e-229	0.544759	0.264	0.008	1.58403e-224	5.65766e-229	2.27399e-273	10
Olig1	4.09188e-52	0.458231	0.156	0.007	1.14564e-47	4.93797e-273	0.629086	0.316	0.01	1.38253e-268	4.09188e-52	9.87594e-273	10
Gap43	1.97805e-257	1.19526	0.312	0.005	5.53814e-253	1.09092e-264	0.667843	0.27	0.007	3.05436e-260	1.97805e-257	2.18184e-264	10
Gfap	7.75619e-80	0.665668	0.273	0.014	2.17158e-75	1.6493e-249	1.6033	0.437	0.023	4.61772e-245	7.75619e-80	3.29861e-249	10
Ppp1r14c	4.98182e-165	1.20082	0.455	0.018	1.39481e-160	7.3955e-247	0.625208	0.368	0.016	2.07059e-242	4.98182e-165	1.4791e-246	10
S100b	2.4609e-75	0.473972	0.273	0.014	6.89002e-71	2.36244e-246	0.538709	0.414	0.021	6.61437e-242	2.4609e-75	4.72489e-246	10
Mt3	1.31781e-80	1.37665	0.545	0.057	3.6896e-76	1.43126e-236	1.74531	0.747	0.083	4.00724e-232	1.31781e-80	2.86252e-236	10
Slc1a3	2.72494e-45	1.88219	0.558	0.107	7.62929e-41	6.24567e-227	1.84446	0.69	0.072	1.74866e-222	2.72494e-45	1.24913e-226	10
Vcan	1.20848e-184	0.454144	0.312	0.007	3.38349e-180	1.00305e-223	0.355283	0.276	0.01	2.80835e-219	1.20848e-184	2.00611e-223	10
Gas1	3.17433e-60	0.581404	0.39	0.037	8.8875e-56	1.62061e-223	0.483431	0.483	0.032	4.53739e-219	3.17433e-60	3.24122e-223	10
Gdf10	9.66482e-60	0.291849	0.104	0.002	2.70596e-55	5.83906e-219	0.379823	0.161	0.003	1.63482e-214	9.66482e-60	1.16781e-218	10
Stmn4	4.44285e-127	0.925166	0.195	0.004	1.24391e-122	1.01355e-216	0.30767	0.167	0.003	2.83774e-212	4.44285e-127	2.0271e-216	10
Nhlh1	8.98816e-181	0.324902	0.117	0.001	2.5165e-176	2.03277e-211	0.26943	0.115	0.001	5.69134e-207	8.98816e-181	4.06553e-211	10
Map2	3.70707e-60	0.486211	0.39	0.038	1.03791e-55	8.89317e-208	0.542785	0.5	0.038	2.48991e-203	3.70707e-60	1.77863e-207	10
Fez1	7.1624e-83	0.489191	0.455	0.037	2.00533e-78	6.44775e-207	0.685304	0.563	0.049	1.80524e-202	7.1624e-83	1.28955e-206	10
Col9a3	3.90574e-205	0.500109	0.325	0.007	1.09353e-200	7.91113e-81	0.277755	0.149	0.008	2.21496e-76	7.91113e-81	7.81147e-205	10
Lhx2	3.86463e-72	0.333832	0.117	0.003	1.08202e-67	3.09429e-202	0.321991	0.184	0.004	8.66339e-198	3.86463e-72	6.18858e-202	10
Bdh1	1.44198e-199	0.352336	0.312	0.006	4.03727e-195	1.8795e-172	0.307559	0.27	0.012	5.26223e-168	1.8795e-172	2.88397e-199	10
Nfix	2.55097e-71	1.49204	0.675	0.101	7.1422e-67	3.8135e-193	1.49044	0.753	0.103	1.0677e-188	2.55097e-71	7.627e-193	10
Reln	1.34866e-191	0.39899	0.273	0.005	3.77597e-187	6.16516e-189	0.335869	0.19	0.005	1.72612e-184	6.16516e-189	2.69731e-191	10
Syt11	1.19828e-111	1.26537	0.779	0.089	3.35494e-107	2.53053e-176	1.30283	0.799	0.133	7.08499e-172	1.19828e-111	5.06107e-176	10
Sstr2	6.98314e-71	0.352935	0.143	0.004	1.95514e-66	5.07017e-175	0.277235	0.161	0.004	1.41955e-170	6.98314e-71	1.01403e-174	10
Cacng4	3.85877e-171	0.259819	0.234	0.004	1.08038e-166	5.90218e-169	0.288678	0.207	0.007	1.65249e-164	5.90218e-169	7.71753e-171	10
Lsamp	7.78493e-70	0.636789	0.494	0.052	2.17962e-65	3.39214e-170	0.596532	0.58	0.063	9.49733e-166	7.78493e-70	6.78429e-170	10
Pla2g7	2.56727e-83	0.471815	0.429	0.033	7.18784e-79	1.53115e-166	0.751537	0.489	0.046	4.28692e-162	2.56727e-83	3.0623e-166	10
Cspg5	5.45078e-57	0.731249	0.364	0.034	1.52611e-52	1.66228e-161	0.794832	0.42	0.034	4.65406e-157	5.45078e-57	3.32457e-161	10
Meis2	1.11366e-129	0.370483	0.208	0.004	3.11802e-125	1.57244e-158	0.34729	0.207	0.008	4.40252e-154	1.11366e-129	3.14488e-158	10
Smpd3	2.18815e-107	0.332446	0.208	0.006	6.12639e-103	8.10022e-157	0.26826	0.201	0.007	2.2679e-152	2.18815e-107	1.62004e-156	10
Clu	3.40754e-60	0.317284	0.286	0.02	9.54043e-56	1.50303e-149	0.932428	0.368	0.028	4.20819e-145	3.40754e-60	3.00607e-149	10
Thrsp	0.00155688	0.672552	0.13	0.052	1	1.58678e-139	0.595492	0.236	0.012	4.44268e-135	0.00155688	3.17357e-139	10
Kif21a	1.92815e-33	0.419148	0.247	0.026	5.39842e-29	1.6467e-136	0.500763	0.437	0.044	4.61044e-132	1.92815e-33	3.29341e-136	10
Tst	4.12932e-49	0.514895	0.39	0.045	1.15613e-44	6.36853e-134	0.491731	0.42	0.041	1.78306e-129	4.12932e-49	1.27371e-133	10
Mt2	9.95895e-60	1.0252	0.429	0.045	2.78831e-55	1.73155e-126	0.96646	0.534	0.07	4.84799e-122	9.95895e-60	3.4631e-126	10
Id4	9.09862e-19	0.310057	0.221	0.036	2.54743e-14	1.81405e-120	0.592203	0.322	0.026	5.07899e-116	9.09862e-19	3.62811e-120	10
Hist3h2ba	6.45171e-117	0.631512	0.429	0.023	1.80635e-112	1.68347e-62	0.421213	0.241	0.028	4.71339e-58	1.68347e-62	1.29034e-116	10
Ncam1	2.5776e-63	0.944939	0.584	0.08	7.21676e-59	1.7063e-116	0.714603	0.621	0.105	4.77731e-112	2.5776e-63	3.41261e-116	10
Id2	1.06736e-30	0.964815	0.636	0.194	2.9884e-26	6.1266e-114	0.859229	0.741	0.157	1.71532e-109	1.06736e-30	1.22532e-113	10
Bcl7a	1.19339e-101	0.405678	0.325	0.015	3.34125e-97	8.4613e-111	0.365011	0.23	0.014	2.36899e-106	1.19339e-101	1.69226e-110	10
Wasf1	2.21975e-77	0.380718	0.26	0.013	6.21485e-73	1.00873e-105	0.267179	0.23	0.015	2.82424e-101	2.21975e-77	2.01746e-105	10
Tnik	9.84557e-40	0.54298	0.364	0.049	2.75656e-35	4.24889e-105	0.481314	0.437	0.056	1.1896e-100	9.84557e-40	8.49778e-105	10
Celf2	3.04421e-60	1.42479	0.779	0.164	8.52318e-56	8.64621e-104	1.0378	0.724	0.165	2.42077e-99	3.04421e-60	1.72924e-103	10
Srcin1	2.74674e-101	0.586944	0.377	0.021	7.69034e-97	1.31919e-86	0.372799	0.282	0.028	3.69348e-82	1.31919e-86	5.49349e-101	10
Ndrg2	4.20027e-27	0.953643	0.662	0.243	1.17599e-22	4.14439e-100	1.34455	0.81	0.244	1.16035e-95	4.20027e-27	8.28878e-100	10
Mdga1	3.28966e-25	0.27958	0.195	0.022	9.21039e-21	5.52622e-98	0.266726	0.247	0.019	1.54723e-93	3.28966e-25	1.10524e-97	10
Stmn2	2.48181e-96	1.8508	0.455	0.032	6.94856e-92	9.85435e-52	1.12393	0.322	0.056	2.75902e-47	9.85435e-52	4.96361e-96	10
Gpm6b	2.27804e-43	1.36515	0.896	0.388	6.37807e-39	2.23696e-94	1.51887	0.931	0.401	6.26304e-90	2.27804e-43	4.47392e-94	10
Nnat	4.11631e-32	0.959248	0.701	0.209	1.15248e-27	6.58523e-88	1.52126	0.81	0.259	1.84373e-83	4.11631e-32	1.31705e-87	10
Ahi1	7.21529e-24	0.396971	0.364	0.074	2.02014e-19	9.08913e-88	0.438411	0.471	0.077	2.54478e-83	7.21529e-24	1.81783e-87	10
Shisa4	1.47352e-09	0.467843	0.338	0.129	4.12556e-05	2.25209e-85	0.661244	0.575	0.119	6.30539e-81	1.47352e-09	4.50417e-85	10
Bicd1	3.2466e-48	0.364197	0.26	0.021	9.08983e-44	7.9364e-85	0.337514	0.299	0.032	2.22203e-80	3.2466e-48	1.58728e-84	10
Sfxn5	4.34874e-42	0.404056	0.416	0.058	1.21756e-37	1.72034e-82	0.355373	0.42	0.064	4.81661e-78	4.34874e-42	3.44068e-82	10
Mt1	7.63467e-18	1.25922	0.597	0.281	2.13755e-13	1.61766e-80	1.54287	0.81	0.306	4.52913e-76	7.63467e-18	3.23532e-80	10
Ednrb	7.21386e-33	0.54878	0.39	0.066	2.01974e-28	1.27636e-77	0.850436	0.489	0.094	3.57356e-73	7.21386e-33	2.55273e-77	10
Mapt	1.00716e-07	0.511568	0.182	0.051	0.00281986	3.33803e-76	0.322303	0.345	0.047	9.34583e-72	1.00716e-07	6.67607e-76	10
Celf4	1.32393e-39	0.356386	0.247	0.022	3.70673e-35	3.51859e-76	0.35881	0.218	0.019	9.85135e-72	1.32393e-39	7.03718e-76	10
Slc22a17	1.8437e-11	0.358255	0.364	0.133	5.16198e-07	1.03399e-74	0.54224	0.563	0.127	2.89497e-70	1.8437e-11	2.06799e-74	10
Clip3	9.49093e-27	0.459516	0.481	0.115	2.65727e-22	6.28339e-70	0.595097	0.546	0.128	1.75922e-65	9.49093e-27	1.25668e-69	10
Mdk	1.42766e-27	0.805035	0.571	0.153	3.99716e-23	1.37033e-69	0.779431	0.621	0.171	3.83666e-65	1.42766e-27	2.74067e-69	10
Tril	3.95279e-13	0.491224	0.481	0.197	1.1067e-08	4.6132e-69	0.451846	0.58	0.143	1.2916e-64	3.95279e-13	9.22641e-69	10
Fabp7	1.04137e-16	1.71581	0.584	0.284	2.91562e-12	1.84916e-67	1.79165	0.77	0.35	5.17728e-63	1.04137e-16	3.69832e-67	10
Rnd2	1.37659e-31	0.667105	0.506	0.116	3.85418e-27	9.08301e-67	0.875318	0.552	0.138	2.54306e-62	1.37659e-31	1.8166e-66	10
Igfbp5	9.45199e-25	0.505267	0.156	0.014	2.64637e-20	3.73574e-65	0.47978	0.345	0.053	1.04593e-60	9.45199e-25	7.47148e-65	10
Vldlr	5.5479e-35	0.271994	0.156	0.01	1.5533e-30	4.27147e-65	0.276951	0.236	0.026	1.19593e-60	5.5479e-35	8.54294e-65	10
Gm1673	1.75751e-40	0.93266	0.753	0.218	4.92067e-36	1.35519e-64	0.961892	0.713	0.247	3.79426e-60	1.75751e-40	2.71038e-64	10
Ptprs	6.82134e-33	0.889063	0.74	0.265	1.90984e-28	5.85282e-63	0.869058	0.747	0.283	1.63867e-58	6.82134e-33	1.17056e-62	10
Podxl2	9.4945e-16	0.574792	0.442	0.154	2.65827e-11	1.11465e-62	0.624565	0.489	0.109	3.12079e-58	9.4945e-16	2.2293e-62	10
Rcor2	5.5315e-62	0.632204	0.377	0.034	1.54871e-57	1.43469e-30	0.510248	0.264	0.063	4.01685e-26	1.43469e-30	1.1063e-61	10
Adcyap1r1	2.81885e-22	0.299922	0.364	0.078	7.89223e-18	4.59764e-61	0.452657	0.454	0.096	1.28725e-56	2.81885e-22	9.19528e-61	10
Tspan7	3.86378e-22	0.895401	0.519	0.159	1.08178e-17	2.59851e-59	0.756605	0.603	0.18	7.27531e-55	3.86378e-22	5.19702e-59	10
Ckb	9.06103e-34	1.52715	0.909	0.552	2.53691e-29	2.70385e-58	1.24214	0.943	0.654	7.57025e-54	9.06103e-34	5.40771e-58	10
Rundc3a	2.63577e-57	0.501757	0.377	0.037	7.37962e-53	3.62707e-45	0.331283	0.27	0.047	1.01551e-40	3.62707e-45	5.27154e-57	10
Pfn2	4.96043e-46	1.45003	0.753	0.201	1.38882e-41	2.13879e-56	1.00123	0.626	0.202	5.98817e-52	4.96043e-46	4.27757e-56	10
Fabp5	6.05581e-33	1.13406	0.974	0.527	1.69551e-28	5.82081e-56	0.967439	0.937	0.544	1.62971e-51	6.05581e-33	1.16416e-55	10
Celsr2	2.0819e-26	0.441361	0.286	0.044	5.82891e-22	1.76959e-55	0.368643	0.293	0.046	4.9545e-51	2.0819e-26	3.53918e-55	10
Phgdh	1.58431e-50	0.601469	0.571	0.094	4.43575e-46	2.17087e-53	0.649577	0.5	0.132	6.078e-49	1.58431e-50	4.34174e-53	10
Cnih2	2.65263e-34	0.46027	0.247	0.026	7.42684e-30	1.33068e-52	0.258158	0.236	0.031	3.72564e-48	2.65263e-34	2.66136e-52	10
Nrxn2	1.00025e-17	0.408817	0.545	0.208	2.8005e-13	2.38677e-52	0.550343	0.644	0.214	6.68247e-48	1.00025e-17	4.77354e-52	10
Cyfip2	9.1983e-11	0.276994	0.117	0.018	2.57534e-06	2.40093e-52	0.290031	0.178	0.018	6.72212e-48	9.1983e-11	4.80186e-52	10
Kcnip3	2.23957e-31	0.312563	0.39	0.067	6.27033e-27	1.27355e-50	0.256564	0.345	0.065	3.56568e-46	2.23957e-31	2.54709e-50	10
Fhl1	7.4364e-50	0.329254	0.26	0.02	2.08204e-45	2.14106e-50	0.337457	0.218	0.028	5.99455e-46	7.4364e-50	4.28212e-50	10
Basp1	5.69732e-35	1.64832	0.597	0.149	1.59514e-30	4.28404e-50	1.286	0.626	0.234	1.19945e-45	5.69732e-35	8.56808e-50	10
Cd63	4.64726e-19	0.819242	0.883	0.574	1.30114e-14	1.57312e-49	0.926245	0.954	0.636	4.40443e-45	4.64726e-19	3.14625e-49	10
Nr2f1	1.16569e-13	0.65947	0.519	0.236	3.26371e-09	1.90174e-49	0.585313	0.701	0.276	5.32449e-45	1.16569e-13	3.80348e-49	10
Igfbp2	2.10945e-08	0.316635	0.26	0.087	0.000590604	6.8676e-49	0.396583	0.362	0.073	1.92279e-44	2.10945e-08	1.37352e-48	10
Fxyd6	8.67235e-27	1.329	0.532	0.149	2.42808e-22	2.53171e-48	1.15896	0.598	0.212	7.08828e-44	8.67235e-27	5.06342e-48	10
Dbi	5.04559e-15	1.2222	0.935	0.932	1.41267e-10	4.24876e-46	1.8328	0.92	0.936	1.18957e-41	5.04559e-15	8.49751e-46	10
Apoe	2.8756e-05	1.61026	0.61	0.636	0.805109	8.91524e-46	2.50398	0.741	0.489	2.49609e-41	2.8756e-05	1.78305e-45	10
Mgst1	1.72797e-07	0.288564	0.195	0.059	0.00483798	3.43424e-45	0.56579	0.374	0.084	9.61519e-41	1.72797e-07	6.86848e-45	10
Psat1	3.53533e-13	0.634286	0.506	0.231	9.89822e-09	7.05192e-44	0.480573	0.638	0.253	1.9744e-39	3.53533e-13	1.41038e-43	10
Asrgl1	2.96034e-11	0.277524	0.468	0.195	8.28835e-07	9.51581e-44	0.452476	0.598	0.219	2.66424e-39	2.96034e-11	1.90316e-43	10
Hdgfrp3	2.37735e-27	0.764721	0.468	0.112	6.6561e-23	1.12227e-43	0.455736	0.431	0.115	3.14214e-39	2.37735e-27	2.24455e-43	10
Peg3	6.19372e-08	0.36155	0.286	0.113	0.00173412	5.607e-43	0.400181	0.46	0.128	1.56985e-38	6.19372e-08	1.1214e-42	10
Serf1	1.97798e-10	0.436419	0.61	0.345	5.53795e-06	1.01395e-42	0.664323	0.805	0.404	2.83886e-38	1.97798e-10	2.0279e-42	10
Zbtb20	1.62271e-19	0.927526	0.909	0.682	4.54326e-15	7.54634e-41	1.22667	0.914	0.751	2.11282e-36	1.62271e-19	1.50927e-40	10
Marcks	9.00689e-25	0.847283	1	0.922	2.52175e-20	1.5252e-40	0.84957	0.994	0.931	4.27027e-36	9.00689e-25	3.05041e-40	10
Tubb2b	2.16672e-22	1.58015	0.857	0.541	6.06639e-18	2.18136e-40	1.15798	0.897	0.673	6.10738e-36	2.16672e-22	4.36273e-40	10
Scd2	3.40886e-08	0.757959	0.727	0.687	0.000954412	6.50805e-38	0.889543	0.856	0.702	1.82212e-33	3.40886e-08	1.30161e-37	10
Ttc3	3.2531e-06	0.667728	0.727	0.688	0.0910804	9.30321e-37	0.755543	0.931	0.688	2.60471e-32	3.2531e-06	1.86064e-36	10
Aplp1	5.78141e-17	0.701459	0.481	0.16	1.61868e-12	2.47588e-36	0.678217	0.557	0.201	6.93197e-32	5.78141e-17	4.95176e-36	10
Tmod2	3.41692e-31	0.433665	0.468	0.097	9.56669e-27	9.01002e-36	0.375859	0.489	0.165	2.52262e-31	3.41692e-31	1.802e-35	10
Sdc4	1.43663e-15	0.325345	0.312	0.078	4.02226e-11	9.37225e-35	0.438904	0.448	0.145	2.62404e-30	1.43663e-15	1.87445e-34	10
Rnf165	5.63824e-21	0.465044	0.351	0.079	1.57859e-16	8.70582e-34	0.38525	0.31	0.074	2.43745e-29	5.63824e-21	1.74116e-33	10
Pmm1	3.12296e-09	0.312255	0.506	0.252	8.74366e-05	1.92045e-33	0.356205	0.615	0.255	5.37687e-29	3.12296e-09	3.84089e-33	10
Slc38a1	2.30692e-09	0.426355	0.377	0.164	6.45891e-05	4.56185e-33	0.621846	0.563	0.239	1.27723e-28	2.30692e-09	9.12371e-33	10
Ptn	5.65271e-14	0.744486	0.948	0.709	1.58265e-09	9.52855e-33	0.834161	0.971	0.747	2.6678e-28	5.65271e-14	1.90571e-32	10
Plpp3	1.75069e-08	0.803699	0.545	0.373	0.000490157	1.1372e-32	0.928897	0.73	0.475	3.18395e-28	1.75069e-08	2.27441e-32	10
Tdrkh	1.19705e-26	0.340259	0.299	0.048	3.35151e-22	1.58844e-32	0.271285	0.276	0.063	4.44731e-28	1.19705e-26	3.17688e-32	10
Apbb1	1.08022e-16	0.409331	0.442	0.139	3.02441e-12	1.65798e-32	0.323192	0.385	0.114	4.64202e-28	1.08022e-16	3.31596e-32	10
Akt2	8.22929e-07	0.335951	0.39	0.207	0.0230404	2.46732e-32	0.334002	0.552	0.225	6.90801e-28	8.22929e-07	4.93464e-32	10
Mapk8ip1	4.19694e-22	0.501777	0.506	0.149	1.17506e-17	2.95034e-32	0.401299	0.483	0.167	8.26035e-28	4.19694e-22	5.90067e-32	10
Msi2	2.51662e-10	0.374169	0.753	0.546	7.04605e-06	3.29323e-32	0.558405	0.845	0.577	9.2204e-28	2.51662e-10	6.58647e-32	10
Ezr	6.2339e-32	0.754314	0.584	0.153	1.74537e-27	3.00409e-22	0.561985	0.552	0.284	8.41084e-18	3.00409e-22	1.24678e-31	10
Fam181b	5.57555e-12	0.338591	0.338	0.112	1.56104e-07	8.54229e-32	0.307127	0.425	0.134	2.39167e-27	5.57555e-12	1.70846e-31	10
Gabbr1	1.52753e-12	0.41641	0.532	0.244	4.27677e-08	1.14881e-31	0.478253	0.592	0.264	3.21642e-27	1.52753e-12	2.29761e-31	10
Kif1b	5.62909e-10	0.418779	0.779	0.59	1.57603e-05	1.59054e-31	0.5649	0.868	0.635	4.45319e-27	5.62909e-10	3.18107e-31	10
Atp6v0e2	0.0169925	0.329739	0.325	0.24	1	4.57831e-31	0.340966	0.603	0.262	1.28184e-26	0.0169925	9.15663e-31	10
Sepw1	1.03516e-23	0.48858	1	0.986	2.89825e-19	1.71083e-30	0.391074	1	0.987	4.78997e-26	1.03516e-23	3.42165e-30	10
Ngfrap1	1.60176e-15	0.990285	0.831	0.576	4.48461e-11	3.9303e-30	0.817829	0.879	0.602	1.1004e-25	1.60176e-15	7.8606e-30	10
Sox9	4.39853e-07	0.497896	0.571	0.423	0.012315	8.17001e-30	0.739736	0.713	0.405	2.28744e-25	4.39853e-07	1.634e-29	10
Rbfox3	2.14733e-24	0.421995	0.416	0.092	6.01209e-20	2.03366e-29	0.384107	0.27	0.065	5.69384e-25	2.14733e-24	4.06732e-29	10
Pbx1	8.79043e-13	0.535763	0.727	0.431	2.46114e-08	2.64153e-28	0.707382	0.701	0.419	7.39575e-24	8.79043e-13	5.28306e-28	10
Tspan3	8.35453e-06	0.540106	0.896	0.837	0.23391	6.91488e-28	0.426119	0.977	0.817	1.93603e-23	8.35453e-06	1.38298e-27	10
Zic5	6.41057e-20	0.818764	0.61	0.25	1.79483e-15	1.01889e-27	0.632408	0.506	0.222	2.85268e-23	6.41057e-20	2.03778e-27	10
Marcksl1	3.01566e-19	1.06558	0.948	0.826	8.44324e-15	1.66407e-27	0.647868	0.977	0.891	4.65905e-23	3.01566e-19	3.32813e-27	10
Clmp	5.15991e-21	0.615108	0.286	0.054	1.44467e-16	2.75751e-27	0.400824	0.27	0.068	7.72047e-23	5.15991e-21	5.51501e-27	10
H1fx	2.0217e-11	1.02058	0.571	0.31	5.66036e-07	4.14188e-27	0.848911	0.626	0.305	1.15964e-22	2.0217e-11	8.28375e-27	10
Ccnd2	1.34053e-21	2.06721	0.818	0.482	3.7532e-17	4.20136e-27	1.39011	0.839	0.63	1.1763e-22	1.34053e-21	8.40271e-27	10
Cpe	6.43292e-05	0.429215	0.922	0.782	1	7.52793e-27	1.23494	0.868	0.65	2.10767e-22	6.43292e-05	1.50559e-26	10
Enho	5.53089e-26	0.284493	0.338	0.06	1.54854e-21	7.59568e-27	0.303547	0.523	0.222	2.12664e-22	5.53089e-26	1.51914e-26	10
Pdgfa	0.595077	0.2716	0.143	0.168	1	1.89804e-26	0.409733	0.552	0.237	5.31414e-22	0.595077	3.79608e-26	10
Zic1	8.83707e-14	1.08943	0.753	0.49	2.4742e-09	2.90534e-26	0.705491	0.833	0.527	8.13437e-22	8.83707e-14	5.81068e-26	10
Plxnb2	8.2697e-07	0.460499	0.455	0.257	0.0231535	7.28249e-26	0.371264	0.575	0.278	2.03895e-21	8.2697e-07	1.4565e-25	10
Cdk5rap2	6.63814e-06	0.289738	0.286	0.132	0.185855	1.48283e-25	0.329552	0.397	0.143	4.15162e-21	6.63814e-06	2.96565e-25	10
Oxct1	1.46259e-11	0.820379	0.623	0.354	4.09495e-07	1.8733e-25	0.520506	0.592	0.29	5.24487e-21	1.46259e-11	3.7466e-25	10
Ntm	1.61135e-06	0.290227	0.416	0.225	0.0451146	2.466e-25	0.459225	0.414	0.152	6.90431e-21	1.61135e-06	4.932e-25	10
Neo1	9.20928e-08	0.342754	0.39	0.189	0.00257841	3.01691e-25	0.351557	0.466	0.184	8.44675e-21	9.20928e-08	6.03382e-25	10
Rcn2	6.66974e-09	0.41566	0.727	0.595	0.000186739	3.0285e-25	0.442718	0.851	0.617	8.47918e-21	6.66974e-09	6.05699e-25	10
Zbtb18	1.40211e-20	0.445537	0.571	0.19	3.92562e-16	3.48866e-25	0.314111	0.477	0.2	9.76754e-21	1.40211e-20	6.97731e-25	10
Nfia	2.74444e-19	1.09037	0.935	0.781	7.68389e-15	4.82688e-25	0.905162	0.908	0.764	1.35143e-20	2.74444e-19	9.65376e-25	10
Snrpn	1.06842e-10	0.503738	0.597	0.34	2.99135e-06	2.14704e-24	0.466546	0.661	0.371	6.0113e-20	1.06842e-10	4.29409e-24	10
Ptch1	1.05525e-15	0.456291	0.545	0.223	2.95449e-11	6.36021e-24	0.304524	0.494	0.218	1.78073e-19	1.05525e-15	1.27204e-23	10
Fam168a	0.00533978	0.261242	0.377	0.289	1	8.24565e-24	0.271441	0.615	0.303	2.30862e-19	0.00533978	1.64913e-23	10
Gse1	3.48352e-20	0.496561	0.429	0.122	9.75315e-16	1.2181e-22	0.353157	0.374	0.137	3.41043e-18	3.48352e-20	2.43619e-22	10
Sec61a2	7.74771e-13	0.358413	0.494	0.206	2.1692e-08	1.29762e-22	0.283918	0.489	0.21	3.63308e-18	7.74771e-13	2.59525e-22	10
Psip1	4.02808e-05	0.953437	0.61	0.567	1	1.53503e-22	0.629008	0.856	0.588	4.29778e-18	4.02808e-05	3.07006e-22	10
Usp22	0.00182389	0.304927	0.481	0.421	1	1.61229e-22	0.383425	0.736	0.433	4.51408e-18	0.00182389	3.22457e-22	10
Ccdc34	1.49999e-09	0.887871	0.714	0.506	4.19966e-05	1.97722e-22	0.639621	0.799	0.537	5.53582e-18	1.49999e-09	3.95444e-22	10
Enah	3.98494e-10	0.451824	0.61	0.36	1.1157e-05	3.19617e-22	0.424779	0.638	0.365	8.94863e-18	3.98494e-10	6.39234e-22	10
Elavl2	4.306e-22	0.962478	0.532	0.164	1.20559e-17	8.21274e-10	0.441173	0.293	0.15	2.2994e-05	8.21274e-10	8.61201e-22	10
Hspa4l	5.50504e-22	0.349599	0.455	0.121	1.5413e-17	1.35636e-14	0.296509	0.31	0.129	3.79754e-10	1.35636e-14	1.10101e-21	10
Fbxo5	2.38871e-21	0.593568	0.416	0.104	6.6879e-17	4.57816e-07	0.280677	0.236	0.12	0.0128179	4.57816e-07	4.77741e-21	10
Mex3a	7.60258e-10	0.655166	0.494	0.25	2.12857e-05	3.11315e-21	0.678107	0.529	0.283	8.71619e-17	7.60258e-10	6.22629e-21	10
Nfib	3.55695e-21	1.3414	0.948	0.873	9.95874e-17	9.49541e-21	1.08778	0.92	0.888	2.65853e-16	9.49541e-21	7.1139e-21	10
Nav2	2.43013e-12	0.46175	0.429	0.168	6.80387e-08	4.01571e-21	0.499375	0.477	0.23	1.12432e-16	2.43013e-12	8.03142e-21	10
Ywhae	4.42113e-10	0.454205	1	0.993	1.23783e-05	7.98211e-21	0.426368	1	0.994	2.23483e-16	4.42113e-10	1.59642e-20	10
Cd9	1.25604e-20	0.906345	0.883	0.589	3.51667e-16	4.22101e-12	0.544659	0.943	0.758	1.1818e-07	4.22101e-12	2.51208e-20	10
Ndn	2.60863e-07	0.453715	0.455	0.266	0.00730366	1.34475e-20	0.351712	0.598	0.32	3.76502e-16	2.60863e-07	2.68949e-20	10
Ctxn1	9.18032e-11	0.710963	0.481	0.222	2.57031e-06	3.07854e-20	0.457586	0.546	0.296	8.6193e-16	9.18032e-11	6.15708e-20	10
Zeb2	0.000118343	0.274335	0.558	0.41	1	3.42229e-20	0.380233	0.736	0.447	9.58173e-16	0.000118343	6.84458e-20	10
Map4k4	1.56724e-06	0.398076	0.857	0.796	0.0438796	1.17204e-19	0.370312	0.925	0.811	3.28148e-15	1.56724e-06	2.34408e-19	10
Hmgn3	2.38751e-19	0.519456	0.857	0.53	6.68455e-15	2.30973e-17	0.464674	0.759	0.567	6.46679e-13	2.30973e-17	4.77502e-19	10
Frmd4a	3.12141e-09	0.643655	0.545	0.313	8.73931e-05	2.7013e-19	0.450569	0.592	0.341	7.56309e-15	3.12141e-09	5.40259e-19	10
Cnrip1	1.86222e-05	0.273655	0.403	0.236	0.521384	4.11514e-19	0.288133	0.494	0.243	1.15216e-14	1.86222e-05	8.23028e-19	10
Anp32e	6.70677e-19	0.860558	0.883	0.542	1.87776e-14	1.29049e-08	0.597205	0.73	0.594	0.000361311	1.29049e-08	1.34135e-18	10
Lockd	9.09853e-19	0.676458	0.532	0.187	2.54741e-14	1.85596e-07	0.686939	0.345	0.221	0.00519632	1.85596e-07	1.81971e-18	10
Cnp	0.301012	1.34579	0.325	0.286	1	1.359e-18	1.26875	0.586	0.314	3.80493e-14	0.301012	2.718e-18	10
Sms	4.53598e-13	0.683444	0.506	0.229	1.26998e-08	2.17582e-18	0.54376	0.557	0.297	6.09186e-14	4.53598e-13	4.35164e-18	10
Cirbp	2.60279e-11	0.62444	0.831	0.594	7.2873e-07	2.80815e-18	0.506468	0.799	0.614	7.86227e-14	2.60279e-11	5.61631e-18	10
Npm3	4.19386e-18	0.498228	0.779	0.457	1.1742e-13	7.3496e-11	0.285482	0.661	0.465	2.05774e-06	7.3496e-11	8.38771e-18	10
Pcbp4	7.11383e-18	0.95775	0.61	0.26	1.99173e-13	2.15221e-14	0.577743	0.511	0.301	6.02576e-10	2.15221e-14	1.42277e-17	10
Arhgap11a	7.30799e-14	0.286813	0.312	0.085	2.04609e-09	8.4369e-18	0.250398	0.305	0.111	2.36216e-13	7.30799e-14	1.68738e-17	10
Ssbp2	1.05775e-06	0.297496	0.416	0.22	0.0296148	2.29925e-17	0.37427	0.489	0.259	6.43743e-13	1.05775e-06	4.59849e-17	10
Pcm1	1.90349e-10	0.515625	0.727	0.503	5.32938e-06	2.43784e-17	0.403796	0.741	0.524	6.82546e-13	1.90349e-10	4.87568e-17	10
Mif	2.90865e-17	0.701042	0.948	0.901	8.14363e-13	3.11447e-13	0.505574	0.983	0.939	8.71991e-09	3.11447e-13	5.81729e-17	10
Sox11	2.10305e-12	1.75031	0.766	0.56	5.88812e-08	3.16324e-17	1.40311	0.776	0.553	8.85643e-13	2.10305e-12	6.32647e-17	10
Ptbp2	2.92486e-08	0.347651	0.403	0.2	0.000818901	4.32727e-17	0.301774	0.437	0.209	1.21155e-12	2.92486e-08	8.65454e-17	10
Dynll2	9.81929e-08	1.14181	0.662	0.5	0.0027492	4.82487e-17	0.738861	0.753	0.519	1.35087e-12	9.81929e-08	9.64974e-17	10
Tsc22d4	1.74965e-05	0.599761	0.61	0.601	0.489866	5.06754e-17	0.557849	0.776	0.622	1.41881e-12	1.74965e-05	1.01351e-16	10
Hmgcs1	3.15724e-15	0.775132	0.688	0.394	8.83965e-11	5.68703e-17	0.381027	0.644	0.43	1.59225e-12	3.15724e-15	1.13741e-16	10
Rbmx	1.06021e-16	0.737007	0.714	0.388	2.96838e-12	1.19911e-05	0.403341	0.489	0.381	0.335726	1.19911e-05	2.12042e-16	10
Tubb4a	2.51682e-10	0.922771	0.416	0.169	7.04661e-06	1.14267e-16	0.555594	0.414	0.194	3.19924e-12	2.51682e-10	2.28534e-16	10
Nt5dc2	1.76766e-06	0.465498	0.649	0.48	0.049491	2.13201e-16	0.554054	0.793	0.509	5.96921e-12	1.76766e-06	4.26402e-16	10
Whsc1	2.63014e-16	0.483438	0.714	0.353	7.36386e-12	3.54905e-10	0.365953	0.552	0.384	9.93662e-06	3.54905e-10	5.26028e-16	10
Arl3	1.88267e-06	0.390916	0.74	0.593	0.052711	3.87963e-16	0.376065	0.799	0.595	1.08622e-11	1.88267e-06	7.75927e-16	10
Pbk	4.77085e-16	0.92124	0.455	0.155	1.33574e-11	0.144438	0.42857	0.213	0.186	1	0.144438	9.54169e-16	10
Rufy3	5.06211e-16	0.44878	0.623	0.271	1.41729e-11	9.30114e-14	0.330425	0.46	0.248	2.60413e-09	9.30114e-14	1.01242e-15	10
Impad1	0.000120945	0.265476	0.662	0.593	1	5.39627e-16	0.287587	0.799	0.616	1.51085e-11	0.000120945	1.07925e-15	10
Cbx5	8.40896e-07	0.450985	0.714	0.58	0.0235434	8.31152e-16	0.375768	0.805	0.614	2.32706e-11	8.40896e-07	1.6623e-15	10
Srsf1	2.19895e-08	0.659812	0.818	0.703	0.000615662	8.6094e-16	0.332423	0.908	0.706	2.41046e-11	2.19895e-08	1.72188e-15	10
Brd3	5.89778e-05	0.300096	0.766	0.662	1	9.77911e-16	0.487259	0.81	0.689	2.73796e-11	5.89778e-05	1.95582e-15	10
H2afy2	3.1142e-14	0.658172	0.403	0.147	8.71914e-10	1.03093e-15	0.309526	0.31	0.124	2.8864e-11	3.1142e-14	2.06186e-15	10
Cog7	2.8957e-10	1.05149	0.468	0.242	8.10737e-06	1.35273e-15	0.665577	0.489	0.274	3.78737e-11	2.8957e-10	2.70546e-15	10
Npdc1	2.57981e-08	0.343015	0.753	0.607	0.000722295	1.55042e-15	0.352282	0.828	0.668	4.34088e-11	2.57981e-08	3.10085e-15	10
Pebp1	1.71118e-15	0.609897	0.948	0.93	4.79095e-11	1.266e-10	0.420143	0.994	0.935	3.54453e-06	1.266e-10	3.42235e-15	10
Cenpv	6.75838e-15	0.370389	0.338	0.095	1.89221e-10	1.8896e-15	0.29605	0.287	0.115	5.29051e-11	6.75838e-15	3.77921e-15	10
Pum1	4.21089e-08	0.37598	0.831	0.644	0.00117896	3.95037e-15	0.285444	0.833	0.661	1.10603e-10	4.21089e-08	7.90074e-15	10
Ctbp1	4.02884e-15	0.50925	0.948	0.858	1.12799e-10	3.66064e-06	0.288035	0.943	0.872	0.102491	3.66064e-06	8.05768e-15	10
Sumo2	1.25216e-14	0.633353	1	0.996	3.50579e-10	0.0439626	0.297123	1	0.998	1	0.0439626	2.50432e-14	10
Ank2	2.5418e-06	0.442691	0.416	0.241	0.0711654	1.43385e-14	0.304987	0.529	0.316	4.01449e-10	2.5418e-06	2.8677e-14	10
Hsp90aa1	1.52786e-14	0.880658	0.987	0.923	4.27769e-10	0.000684983	0.421405	0.977	0.965	1	0.000684983	3.05571e-14	10
Siva1	0.00119566	0.492377	0.623	0.513	1	1.56825e-14	0.39505	0.684	0.479	4.39079e-10	0.00119566	3.1365e-14	10
Cenpf	1.58541e-14	1.2876	0.494	0.187	4.43884e-10	6.89361e-07	1.1933	0.368	0.242	0.0193007	6.89361e-07	3.17083e-14	10
Map1b	2.23845e-14	1.30496	0.805	0.557	6.26721e-10	1.13151e-11	0.540216	0.776	0.628	3.16801e-07	1.13151e-11	4.4769e-14	10
Set	2.30635e-14	0.761398	1	0.894	6.45733e-10	1.55961e-11	0.48246	0.989	0.927	4.3666e-07	1.55961e-11	4.61271e-14	10
Bbip1	1.56025e-11	0.451257	0.779	0.54	4.3684e-07	3.49509e-14	0.37403	0.718	0.522	9.78556e-10	1.56025e-11	6.99018e-14	10
Nusap1	3.69036e-14	0.88299	0.455	0.168	1.03323e-09	2.54685e-05	0.443879	0.316	0.212	0.713067	2.54685e-05	7.38071e-14	10
Cd24a	1.64932e-08	1.17102	0.494	0.287	0.000461777	3.89579e-14	0.687308	0.632	0.454	1.09074e-09	1.64932e-08	7.79157e-14	10
Ssbp3	0.00847424	0.272749	0.494	0.394	1	4.29881e-14	0.394576	0.592	0.395	1.20358e-09	0.00847424	8.59762e-14	10
Srpk2	4.58536e-14	0.513429	0.779	0.549	1.28381e-09	6.39846e-07	0.265994	0.695	0.556	0.0179144	6.39846e-07	9.17071e-14	10
Ncapd2	6.02222e-14	0.425382	0.494	0.203	1.6861e-09	9.72121e-13	0.296093	0.397	0.203	2.72174e-08	9.72121e-13	1.20444e-13	10
Sfxn1	7.35138e-14	0.500949	0.727	0.467	2.05824e-09	3.0541e-06	0.256534	0.626	0.51	0.0855086	3.0541e-06	1.47028e-13	10
Kmt2a	8.00677e-07	0.323122	0.61	0.441	0.0224173	7.94718e-14	0.329156	0.678	0.461	2.22505e-09	8.00677e-07	1.58944e-13	10
Rab6b	1.1767e-13	0.33724	0.468	0.185	3.29454e-09	9.32448e-14	0.263015	0.385	0.187	2.61067e-09	1.1767e-13	1.8649e-13	10
Sqle	0.000100176	0.258227	0.351	0.198	1	1.08441e-13	0.296561	0.408	0.211	3.03613e-09	0.000100176	2.16882e-13	10
Ptov1	4.96932e-06	0.434725	0.857	0.858	0.139131	1.44421e-13	0.403728	0.902	0.825	4.0435e-09	4.96932e-06	2.88842e-13	10
Vamp2	0.00015441	0.31469	0.519	0.392	1	1.47043e-13	0.302967	0.615	0.39	4.11692e-09	0.00015441	2.94087e-13	10
Atxn7l3b	3.29246e-09	0.293961	1	0.94	9.21823e-05	3.28271e-13	0.353568	0.983	0.926	9.19093e-09	3.29246e-09	6.56542e-13	10
Tia1	7.67948e-13	0.603197	0.805	0.606	2.1501e-08	5.22193e-12	0.449338	0.764	0.64	1.46204e-07	5.22193e-12	1.5359e-12	10
Hnrnpab	8.90616e-13	0.722118	0.961	0.892	2.49355e-08	2.46927e-07	0.315011	0.931	0.919	0.00691347	2.46927e-07	1.78123e-12	10
Dpysl2	1.24679e-12	0.67261	0.935	0.813	3.49076e-08	5.74203e-06	0.339742	0.908	0.851	0.160765	5.74203e-06	2.49357e-12	10
H3f3b	1.47642e-12	0.680909	1	1	4.13368e-08	5.66939e-07	0.383416	1	1	0.0158731	5.66939e-07	2.95284e-12	10
Gdi1	0.0674835	0.256868	0.675	0.695	1	1.53797e-12	0.257309	0.868	0.692	4.30601e-08	0.0674835	3.07594e-12	10
Klhdc2	0.00684205	0.324769	0.623	0.594	1	1.59585e-12	0.312826	0.828	0.604	4.46807e-08	0.00684205	3.19171e-12	10
Zic4	1.68492e-12	0.383188	0.584	0.255	4.71745e-08	0.000790582	0.380041	0.322	0.249	1	0.000790582	3.36985e-12	10
Nasp	2.58168e-08	0.820121	0.688	0.515	0.000722818	1.70017e-12	0.354344	0.736	0.528	4.76014e-08	2.58168e-08	3.40035e-12	10
Hnrnph1	1.88183e-12	0.599528	0.883	0.684	5.26875e-08	5.79586e-10	0.272916	0.856	0.741	1.62272e-05	5.79586e-10	3.76366e-12	10
Rab10	0.00273143	0.259134	0.857	0.809	1	2.5359e-12	0.303794	0.925	0.848	7.10002e-08	0.00273143	5.07181e-12	10
H2afy	4.47336e-12	0.69122	0.922	0.797	1.25245e-07	7.15538e-07	0.37559	0.948	0.829	0.0200336	7.15538e-07	8.94673e-12	10
Lsm6	8.45439e-12	0.617965	0.857	0.778	2.36706e-07	1.53773e-07	0.290336	0.914	0.8	0.00430533	1.53773e-07	1.69088e-11	10
Celf1	5.35323e-06	0.288282	0.753	0.69	0.14988	1.02515e-11	0.266982	0.845	0.721	2.87022e-07	5.35323e-06	2.05031e-11	10
Atp1b2	0.00190706	0.26626	0.545	0.448	1	1.298e-11	0.474826	0.621	0.466	3.63414e-07	0.00190706	2.596e-11	10
Top2a	1.32684e-11	1.27672	0.532	0.254	3.71488e-07	2.32577e-08	0.667462	0.466	0.32	0.000651168	2.32577e-08	2.65368e-11	10
Snrpd1	1.42964e-11	0.687223	0.87	0.783	4.00269e-07	1.93083e-06	0.290186	0.885	0.815	0.0540592	1.93083e-06	2.85927e-11	10
Matr3	0.000144079	0.333975	0.74	0.701	1	1.70246e-11	0.368318	0.828	0.71	4.76656e-07	0.000144079	3.40493e-11	10
Ldhb	4.35691e-07	0.344292	0.714	0.549	0.0121985	1.82833e-11	0.301675	0.701	0.488	5.11896e-07	4.35691e-07	3.65666e-11	10
Upf3b	0.00736228	0.250549	0.597	0.516	1	1.87377e-11	0.288937	0.718	0.527	5.24618e-07	0.00736228	3.74754e-11	10
Vps37b	2.44673e-11	0.543384	0.727	0.532	6.85035e-07	0.000212439	0.273932	0.598	0.51	1	0.000212439	4.89346e-11	10
Hirip3	0.00021823	0.321417	0.325	0.189	1	3.5485e-11	0.256977	0.391	0.209	9.9351e-07	0.00021823	7.09701e-11	10
Tfdp2	0.000474468	0.395917	0.468	0.365	1	3.68745e-11	0.300454	0.546	0.356	1.03241e-06	0.000474468	7.3749e-11	10
Hmgb3	9.24673e-06	1.30083	0.636	0.561	0.25889	4.81859e-11	0.695112	0.747	0.596	1.34911e-06	9.24673e-06	9.63719e-11	10
H2afz	5.74389e-11	1.38672	1	0.992	1.60817e-06	0.0333102	0.693638	0.994	0.993	1	0.0333102	1.14878e-10	10
Cbx3	5.892e-11	0.699474	0.961	0.899	1.64964e-06	2.588e-05	0.361315	0.954	0.924	0.724587	2.588e-05	1.1784e-10	10
Hmgn2	6.38522e-11	1.36416	0.922	0.731	1.78773e-06	1.689e-09	0.94793	0.868	0.706	4.72886e-05	1.689e-09	1.27704e-10	10
Hp1bp3	0.000143614	0.3068	0.766	0.652	1	7.55551e-11	0.301458	0.828	0.667	2.11539e-06	0.000143614	1.5111e-10	10
Fubp1	7.71903e-11	0.58367	0.961	0.874	2.16117e-06	0.000121683	0.264095	0.948	0.894	1	0.000121683	1.54381e-10	10
Dbndd2	1.06319e-10	0.501894	0.273	0.083	2.97673e-06	8.4867e-11	0.298554	0.282	0.124	2.37611e-06	1.06319e-10	1.69734e-10	10
Ccnb1	0.00110659	0.702377	0.234	0.126	1	1.37794e-10	0.516639	0.351	0.178	3.85796e-06	0.00110659	2.75588e-10	10
Erh	1.71434e-10	0.63889	0.935	0.962	4.79982e-06	2.39516e-06	0.296949	0.994	0.974	0.0670597	2.39516e-06	3.42869e-10	10
Tcf12	1.37697e-05	0.401182	0.675	0.609	0.385525	1.71806e-10	0.27113	0.753	0.629	4.81024e-06	1.37697e-05	3.43613e-10	10
Nudt4	0.267707	0.290446	0.442	0.456	1	1.88588e-10	0.354448	0.695	0.501	5.2801e-06	0.267707	3.77177e-10	10
Ilf2	3.23725e-06	0.56373	0.714	0.664	0.0906366	1.94189e-10	0.389809	0.845	0.689	5.4369e-06	3.23725e-06	3.88378e-10	10
Hmgn1	1.97554e-10	0.771761	1	0.965	5.53113e-06	6.26808e-10	0.501934	1	0.968	1.75494e-05	6.26808e-10	3.95109e-10	10
H2afv	1.34251e-08	0.934438	0.922	0.942	0.000375877	2.34162e-10	0.869569	0.977	0.936	6.55608e-06	1.34251e-08	4.68325e-10	10
Cdkn2c	2.39856e-10	0.552351	0.468	0.217	6.7155e-06	8.12766e-05	0.320488	0.31	0.208	1	8.12766e-05	4.79713e-10	10
Arl6ip1	0.905165	0.280214	0.87	0.962	1	2.62806e-10	0.418118	0.989	0.95	7.35803e-06	0.905165	5.25611e-10	10
Lmnb1	3.01643e-10	0.95046	0.636	0.422	8.44539e-06	4.12712e-06	0.560488	0.552	0.403	0.115551	4.12712e-06	6.03286e-10	10
Chd7	1.13814e-08	0.528954	0.714	0.532	0.000318656	3.12315e-10	0.596821	0.73	0.553	8.74419e-06	1.13814e-08	6.2463e-10	10
Tns3	0.00370399	0.375962	0.468	0.352	1	3.67686e-10	0.476175	0.529	0.343	1.02945e-05	0.00370399	7.35371e-10	10
Ddah2	4.27182e-10	1.03449	0.883	0.728	1.19603e-05	0.000316433	0.575721	0.885	0.807	1	0.000316433	8.54365e-10	10
Smc2	4.38466e-10	0.850571	0.61	0.364	1.22762e-05	1.67315e-05	0.445338	0.569	0.431	0.46845	1.67315e-05	8.76932e-10	10
Hnrnpa1	4.44538e-10	0.907686	0.948	0.903	1.24462e-05	2.19247e-06	0.564218	0.943	0.922	0.0613848	2.19247e-06	8.89076e-10	10
Hmgb1	5.09715e-10	0.737975	1	0.99	1.4271e-05	8.62883e-05	0.615364	1	0.991	1	8.62883e-05	1.01943e-09	10
Nudt21	5.98486e-09	0.592489	0.792	0.7	0.000167564	6.06113e-10	0.342174	0.902	0.734	1.697e-05	5.98486e-09	1.21223e-09	10
Cdca3	6.25168e-10	0.974977	0.429	0.19	1.75035e-05	4.32184e-05	0.404464	0.356	0.249	1	4.32184e-05	1.25034e-09	10
Fam162a	4.23588e-06	0.364495	0.766	0.654	0.118596	7.83063e-10	0.433756	0.816	0.697	2.19242e-05	4.23588e-06	1.56613e-09	10
Itgb3bp	0.00711922	0.277652	0.325	0.232	1	7.90846e-10	0.290245	0.448	0.268	2.21421e-05	0.00711922	1.58169e-09	10
Hnrnpr	7.24863e-07	0.386074	0.857	0.781	0.0202947	9.30968e-10	0.392982	0.874	0.77	2.60652e-05	7.24863e-07	1.86194e-09	10
Usp1	2.9596e-07	0.653401	0.61	0.429	0.00828629	1.01437e-09	0.349985	0.661	0.478	2.84004e-05	2.9596e-07	2.02874e-09	10
Dut	1.16785e-09	1.12532	0.597	0.362	3.26975e-05	7.01104e-08	0.40406	0.534	0.377	0.00196295	7.01104e-08	2.3357e-09	10
Ccna2	1.42172e-09	0.478021	0.416	0.18	3.98053e-05	1.5159e-09	0.427569	0.397	0.226	4.2442e-05	1.5159e-09	2.84344e-09	10
Tsn	1.70393e-05	0.366835	0.909	0.841	0.477067	2.14806e-09	0.323585	0.914	0.838	6.01414e-05	1.70393e-05	4.29612e-09	10
Eif4g2	1.13291e-06	0.327323	0.987	0.982	0.0317192	2.52237e-09	0.263298	0.994	0.982	7.06213e-05	1.13291e-06	5.04474e-09	10
Srsf3	2.77487e-09	0.670531	0.987	0.944	7.76908e-05	0.018914	0.274278	0.954	0.94	1	0.018914	5.54974e-09	10
Kcnq1ot1	1.8363e-07	0.455812	0.727	0.621	0.00514126	2.79868e-09	0.448942	0.776	0.634	7.83574e-05	1.8363e-07	5.59736e-09	10
Cxxc5	3.43992e-06	0.304349	0.727	0.596	0.0963108	3.28948e-09	0.299467	0.799	0.656	9.20988e-05	3.43992e-06	6.57895e-09	10
Phip	5.53141e-06	0.426705	0.714	0.601	0.154869	3.73244e-09	0.363885	0.736	0.621	0.000104501	5.53141e-06	7.46488e-09	10
H3f3a	8.13317e-08	0.730803	1	0.999	0.00227713	3.763e-09	0.391094	1	0.998	0.000105357	8.13317e-08	7.52601e-09	10
Tcf4	4.39348e-09	0.406454	0.987	0.987	0.000123009	3.21784e-07	0.250108	0.971	0.986	0.00900931	3.21784e-07	8.78697e-09	10
Idh1	5.15561e-09	0.378655	0.584	0.333	0.000144347	5.45814e-06	0.388604	0.471	0.331	0.152817	5.45814e-06	1.03112e-08	10
Srsf7	5.31225e-09	0.619222	0.87	0.743	0.000148732	0.000740086	0.327057	0.851	0.755	1	0.000740086	1.06245e-08	10
Cdk2ap1	8.16918e-09	0.377053	0.792	0.584	0.000228721	3.39282e-07	0.450937	0.753	0.647	0.00949921	3.39282e-07	1.63384e-08	10
2810417H13Rik	8.93397e-09	1.19023	0.481	0.278	0.000250133	4.67341e-07	0.534262	0.506	0.34	0.0130846	4.67341e-07	1.78679e-08	10
Mki67	0.000249367	0.532617	0.325	0.192	1	9.60485e-09	0.581319	0.397	0.24	0.000268917	0.000249367	1.92097e-08	10
Tox3	9.7539e-09	0.457435	0.558	0.353	0.00027309	1.21931e-07	0.260256	0.443	0.304	0.00341383	1.21931e-07	1.95078e-08	10
Maged1	0.000523314	0.473738	0.688	0.628	1	1.01222e-08	0.343503	0.718	0.618	0.000283401	0.000523314	2.02444e-08	10
Prdx2	1.04389e-08	0.379076	0.961	0.968	0.000292269	1.12855e-08	0.255787	1	0.967	0.000315971	1.12855e-08	2.08779e-08	10
Hist3h2a	0.000281224	0.26204	0.571	0.416	1	1.24942e-08	0.253905	0.592	0.443	0.000349812	0.000281224	2.49883e-08	10
Cbx1	1.27036e-08	0.652391	0.922	0.818	0.000355675	1.56267e-06	0.405076	0.897	0.826	0.0437516	1.56267e-06	2.54072e-08	10
Lsm3	0.00958618	0.314855	0.597	0.55	1	1.48168e-08	0.308377	0.741	0.593	0.000414842	0.00958618	2.96337e-08	10
Ube2c	1.12252e-06	1.00697	0.416	0.221	0.0314284	1.72333e-08	0.624564	0.448	0.283	0.000482498	1.12252e-06	3.44666e-08	10
Ube2e2	0.00030982	0.357498	0.494	0.365	1	1.88233e-08	0.280574	0.557	0.422	0.000527016	0.00030982	3.76467e-08	10
Casc5	4.20566e-08	0.366908	0.26	0.091	0.0011775	1.98505e-08	0.25702	0.23	0.107	0.000555774	4.20566e-08	3.9701e-08	10
Hist1h2ap	2.101e-08	1.29458	0.39	0.17	0.000588237	0.000346901	0.547286	0.276	0.181	1	0.000346901	4.202e-08	10
Ska2	2.40278e-08	0.581996	0.442	0.215	0.000672731	0.00269509	0.302516	0.293	0.232	1	0.00269509	4.80556e-08	10
Mgll	2.99305e-08	0.269962	0.558	0.323	0.000837994	2.33473e-07	0.319823	0.552	0.387	0.00653677	2.33473e-07	5.9861e-08	10
Ppp1r14b	1.15017e-05	0.569548	0.805	0.715	0.322024	3.3462e-08	0.370091	0.92	0.795	0.000936868	1.15017e-05	6.69239e-08	10
Ttyh3	4.82008e-05	0.352095	0.558	0.444	1	5.54433e-08	0.27011	0.586	0.473	0.0015523	4.82008e-05	1.10887e-07	10
Tmpo	7.92284e-08	1.03094	0.753	0.582	0.00221824	6.46389e-08	0.487161	0.741	0.597	0.00180976	7.92284e-08	1.29278e-07	10
Prc1	7.8768e-08	0.800189	0.377	0.172	0.00220535	1.72464e-06	0.410055	0.351	0.222	0.0482866	1.72464e-06	1.57536e-07	10
Smc4	9.99372e-08	0.704414	0.727	0.534	0.00279804	5.81492e-06	0.413596	0.684	0.581	0.162806	5.81492e-06	1.99874e-07	10
Zfp292	8.47124e-07	0.25528	0.74	0.598	0.0237178	1.06284e-07	0.265959	0.724	0.609	0.00297574	8.47124e-07	2.12568e-07	10
Rad21	1.20095e-05	0.413101	0.753	0.601	0.336242	1.18897e-07	0.294788	0.736	0.63	0.00332888	1.20095e-05	2.37794e-07	10
Sfpq	1.29989e-07	0.37145	0.935	0.904	0.00363943	0.000360699	0.285419	0.92	0.89	1	0.000360699	2.59978e-07	10
Nucks1	1.49806e-07	0.447773	0.87	0.722	0.00419427	0.000168453	0.364142	0.81	0.775	1	0.000168453	2.99612e-07	10
Hdgf	7.72149e-07	0.532914	0.896	0.85	0.0216186	2.20005e-07	0.453485	0.931	0.902	0.00615969	7.72149e-07	4.40009e-07	10
Hmgb2	2.258e-07	1.21213	0.909	0.825	0.00632194	3.23911e-05	0.899785	0.908	0.837	0.906886	3.23911e-05	4.516e-07	10
Spc25	8.56246e-05	0.7168	0.338	0.185	1	3.93223e-07	0.450711	0.362	0.236	0.0110095	8.56246e-05	7.86447e-07	10
Cenpa	0.0517935	0.856638	0.325	0.266	1	4.02022e-07	0.608645	0.477	0.337	0.0112558	0.0517935	8.04044e-07	10
Rab3a	0.337164	0.376321	0.338	0.314	1	4.56601e-07	0.350524	0.448	0.319	0.0127839	0.337164	9.13201e-07	10
Smarcc1	1.8105e-06	0.466807	0.636	0.442	0.0506904	4.69939e-07	0.333092	0.586	0.472	0.0131574	1.8105e-06	9.39878e-07	10
Thoc7	2.72688e-05	0.422354	0.818	0.722	0.763471	4.72715e-07	0.266001	0.828	0.747	0.0132351	2.72688e-05	9.45429e-07	10
Ptp4a1	1.25928e-05	0.571187	0.727	0.678	0.352574	5.26028e-07	0.269767	0.793	0.709	0.0147277	1.25928e-05	1.05206e-06	10
Stmn1	9.99798e-07	1.66363	0.87	0.895	0.0279923	5.47151e-07	1.19775	0.902	0.883	0.0153191	9.99798e-07	1.0943e-06	10
Fkbp3	1.09788e-06	0.511731	0.857	0.807	0.0307386	0.00042788	0.396316	0.851	0.809	1	0.00042788	2.19577e-06	10
Ptma	1.48324e-06	0.824214	1	1	0.0415276	0.000349362	0.424058	1	1	1	0.000349362	2.96647e-06	10
Prdx6	1.38601e-05	0.385396	0.766	0.712	0.388055	1.50482e-06	0.318118	0.833	0.726	0.0421319	1.38601e-05	3.00963e-06	10
Smc3	8.32621e-06	0.30898	0.805	0.682	0.233117	1.90705e-06	0.279796	0.833	0.689	0.0533935	8.32621e-06	3.81409e-06	10
Klf9	2.05076e-06	0.540038	0.688	0.572	0.0574173	0.000243217	0.261931	0.718	0.628	1	0.000243217	4.10152e-06	10
Insig1	6.46272e-05	0.292301	0.429	0.271	1	2.481e-06	0.262074	0.5	0.341	0.0694631	6.46272e-05	4.962e-06	10
Tpx2	2.50748e-06	0.723007	0.403	0.214	0.0702044	0.0103752	0.370648	0.316	0.266	1	0.0103752	5.01495e-06	10
Nav1	3.95776e-06	0.363525	0.779	0.653	0.110809	1.05131e-05	0.373265	0.724	0.683	0.294345	1.05131e-05	7.91551e-06	10
Auts2	8.61819e-06	0.260225	0.87	0.729	0.241292	5.35337e-06	0.261646	0.833	0.688	0.149884	8.61819e-06	1.07067e-05	10
Birc5	5.99053e-06	0.716598	0.416	0.238	0.167723	0.00178942	0.345769	0.408	0.321	1	0.00178942	1.1981e-05	10
Cks1b	6.692e-06	0.553128	0.662	0.479	0.187363	3.89139e-05	0.383191	0.695	0.58	1	3.89139e-05	1.33839e-05	10
2700094K13Rik	7.34312e-06	0.700022	0.87	0.788	0.205593	0.0102437	0.405992	0.897	0.822	1	0.0102437	1.46862e-05	10
Tuba1a	0.000132711	0.732089	0.974	0.994	1	1.19911e-05	0.486662	1	0.991	0.335726	0.000132711	2.3982e-05	10
S100a6	0.000123653	0.264916	0.195	0.08	1	1.24861e-05	0.551108	0.408	0.281	0.349586	0.000123653	2.49721e-05	10
Tcf7l2	0.177917	0.383099	0.442	0.571	1	1.71606e-05	0.322854	0.661	0.553	0.480463	0.177917	3.43209e-05	10
S100a1	0.808447	0.335647	0.429	0.482	1	1.75501e-05	0.39913	0.58	0.504	0.491368	0.808447	3.50999e-05	10
Deb1	0.0243744	0.285031	0.519	0.448	1	2.0715e-05	0.289291	0.557	0.465	0.579978	0.0243744	4.14295e-05	10
S100a10	4.32507e-05	0.324176	0.26	0.118	1	2.48726e-05	0.385664	0.523	0.392	0.696383	4.32507e-05	4.97446e-05	10
Pdcd4	0.0170116	0.400748	0.649	0.607	1	2.68402e-05	0.299434	0.661	0.562	0.751471	0.0170116	5.36796e-05	10
Hn1	0.000183006	0.775757	0.792	0.715	1	4.34234e-05	0.60384	0.851	0.817	1	0.000183006	8.68448e-05	10
Rnf187	4.4202e-05	0.422097	0.831	0.78	1	0.00276195	0.283067	0.839	0.77	1	0.00276195	8.8402e-05	10
Dek	4.69329e-05	0.811598	0.831	0.819	1	0.199689	0.4188	0.839	0.819	1	0.199689	9.38636e-05	10
Bzw2	5.82587e-05	0.482854	0.571	0.424	1	0.0956085	0.257663	0.466	0.439	1	0.0956085	0.000116514	10
Calm2	6.25382e-05	0.796122	0.987	0.983	1	0.0500836	0.503031	0.989	0.987	1	0.0500836	0.000125073	10
Ccdc88a	0.000254745	0.442844	0.688	0.629	1	7.37593e-05	0.269743	0.713	0.647	1	0.000254745	0.000147513	10
Cst3	0.0281582	0.634733	0.844	0.998	1	0.000107001	0.755483	0.977	0.995	1	0.0281582	0.000213991	10
Tuba1b	0.000156744	0.508106	0.909	0.945	1	0.00269821	0.317966	0.971	0.953	1	0.00269821	0.000313463	10
Mllt11	0.00106866	0.371234	0.338	0.215	1	0.000187521	0.256452	0.351	0.264	1	0.00106866	0.000375006	10
Ube2s	0.000259526	0.566114	0.883	0.936	1	0.643394	0.351531	0.948	0.96	1	0.643394	0.000518984	10
Vbp1	0.00027466	0.406248	0.753	0.703	1	0.00990462	0.265416	0.736	0.703	1	0.00990462	0.000549244	10
H2afx	0.0273843	0.707179	0.61	0.56	1	0.000291329	0.481048	0.684	0.603	1	0.0273843	0.000582573	10
Cdk4	0.00100423	0.500512	0.818	0.846	1	0.00131866	0.308129	0.92	0.873	1	0.00131866	0.00200745	10
Fyn	0.930099	0.56368	0.636	0.744	1	0.00108027	0.547281	0.839	0.818	1	0.930099	0.00215937	10
Fam64a	0.00242159	0.499813	0.26	0.151	1	0.00179304	0.281641	0.264	0.193	1	0.00242159	0.00358287	10
Map3k1	0.00220027	0.342827	0.623	0.585	1	0.0422557	0.261522	0.644	0.594	1	0.0422557	0.0043957	10
Ube2e3	0.00958614	0.497774	0.844	0.861	1	0.00398602	0.352587	0.925	0.858	1	0.00958614	0.00795614	10
Ndufc2	0.0499184	0.317181	0.961	0.943	1	0.00459401	0.251444	0.943	0.943	1	0.0499184	0.00916691	10
Slc29a1	0.00559044	0.527042	0.74	0.71	1	0.776234	0.335115	0.615	0.666	1	0.776234	0.0111496	10
Reep5	0.00764103	0.451369	0.779	0.895	1	0.711291	0.256864	0.885	0.92	1	0.711291	0.0152237	10
Aldh1a2	7.62129e-150	0.329842	0.109	0.001	2.13381e-145	5.24553e-267	0.552406	0.139	0.001	1.46864e-262	7.62129e-150	1.04911e-266	11
Cyp1b1	3.8228e-93	0.259374	0.117	0.003	1.07031e-88	4.23236e-121	0.333826	0.188	0.005	1.18498e-116	3.8228e-93	8.46472e-121	11
Dcn	5.92467e-75	1.29411	0.188	0.011	1.65879e-70	6.81628e-115	1.80902	0.327	0.018	1.90842e-110	5.92467e-75	1.36326e-114	11
Col6a1	3.3847e-68	0.662045	0.195	0.013	9.47649e-64	2.54222e-85	0.82095	0.327	0.024	7.1177e-81	3.3847e-68	5.08444e-85	11
Col1a1	4.81197e-79	1.83141	0.43	0.056	1.34726e-74	2.18743e-55	2.13275	0.446	0.07	6.12436e-51	2.18743e-55	9.62395e-79	11
Fstl1	8.18766e-79	1.48244	0.984	0.612	2.29238e-74	2.04846e-54	1.32734	0.98	0.701	5.73527e-50	2.04846e-54	1.63753e-78	11
Cd63	2.5959e-75	1.67368	0.977	0.573	7.26801e-71	2.18496e-58	1.47824	0.98	0.637	6.11745e-54	2.18496e-58	5.19181e-75	11
Lgals1	5.33618e-75	2.24354	0.977	0.558	1.49402e-70	6.14494e-57	2.20839	0.96	0.677	1.72046e-52	6.14494e-57	1.06724e-74	11
Vtn	4.49995e-69	1.88967	1	0.647	1.2599e-64	4.71379e-43	1.8899	0.921	0.701	1.31977e-38	4.71379e-43	8.99991e-69	11
Ndufa4l2	9.54395e-69	1.64744	0.984	0.653	2.67212e-64	5.62549e-34	1.47074	0.871	0.697	1.57503e-29	5.62549e-34	1.90879e-68	11
Fabp5	3.50305e-64	2.21666	0.914	0.526	9.80784e-60	2.02469e-31	1.65887	0.802	0.546	5.66874e-27	2.02469e-31	7.0061e-64	11
Rarres2	4.40762e-62	1.49381	0.906	0.471	1.23404e-57	2.51659e-34	1.40411	0.851	0.527	7.04594e-30	2.51659e-34	8.81523e-62	11
Cald1	4.44278e-62	1.49152	0.969	0.803	1.24389e-57	3.21808e-44	1.28568	1	0.891	9.00999e-40	3.21808e-44	8.88556e-62	11
Serping1	2.64231e-48	0.364906	0.219	0.023	7.39793e-44	8.16174e-62	0.548129	0.198	0.012	2.28512e-57	2.64231e-48	1.63235e-61	11
Igfbp2	1.70028e-08	1.55774	0.211	0.087	0.000476044	2.64983e-60	1.84049	0.475	0.074	7.41899e-56	1.70028e-08	5.29965e-60	11
Glipr2	5.41706e-60	0.755586	0.594	0.149	1.51667e-55	7.03886e-28	0.59389	0.535	0.184	1.97074e-23	7.03886e-28	1.08341e-59	11
Gsn	1.93506e-59	0.451655	0.273	0.029	5.41777e-55	1.1387e-19	0.365628	0.149	0.02	3.18814e-15	1.1387e-19	3.87011e-59	11
S100a11	1.18605e-58	1.29613	0.984	0.878	3.32069e-54	1.07409e-42	1.06038	0.99	0.934	3.00724e-38	1.07409e-42	2.37209e-58	11
Atp1a2	7.4723e-57	1.28705	0.984	0.624	2.09209e-52	4.45258e-37	1.10192	0.97	0.68	1.24663e-32	4.45258e-37	1.49446e-56	11
Pcolce	7.58892e-57	1.24392	0.789	0.325	2.12475e-52	4.24595e-40	1.08216	0.644	0.211	1.18878e-35	4.24595e-40	1.51778e-56	11
Tppp3	1.33644e-56	1.23472	0.828	0.374	3.74178e-52	2.77243e-21	0.939575	0.713	0.401	7.76224e-17	2.77243e-21	2.67289e-56	11
Fam101a	1.65593e-56	0.966232	0.836	0.382	4.63627e-52	3.41959e-19	0.788652	0.673	0.415	9.57418e-15	3.41959e-19	3.31186e-56	11
Lhfp	4.37014e-56	1.14975	0.984	0.649	1.22355e-51	7.44819e-47	1.12688	0.97	0.694	2.08534e-42	7.44819e-47	8.74029e-56	11
Ptn	4.00769e-54	1.83624	0.992	0.708	1.12207e-49	1.12759e-39	1.74613	0.921	0.748	3.15702e-35	1.12759e-39	8.01537e-54	11
Zic1	1.61445e-53	0.948783	0.906	0.488	4.52012e-49	1.94875e-25	0.716203	0.812	0.529	5.45612e-21	1.94875e-25	3.22889e-53	11
Pth1r	1.83263e-53	0.959713	0.828	0.386	5.13101e-49	3.65852e-05	0.625411	0.495	0.431	1	3.65852e-05	3.66527e-53	11
Phlda1	1.02532e-52	1.11062	0.992	0.849	2.87069e-48	6.49807e-25	0.746355	0.921	0.89	1.81933e-20	6.49807e-25	2.05064e-52	11
Col4a1	1.35083e-52	0.846517	0.992	0.98	3.78207e-48	2.64644e-10	0.366232	0.96	0.984	7.4095e-06	2.64644e-10	2.70167e-52	11
Myl9	5.36193e-52	1.69649	0.961	0.649	1.50123e-47	5.53519e-32	1.35218	0.941	0.652	1.54974e-27	5.53519e-32	1.07239e-51	11
Slc9a3r1	7.15481e-52	1.17823	0.891	0.562	2.0032e-47	1.30061e-19	1.01607	0.802	0.621	3.64144e-15	1.30061e-19	1.43096e-51	11
Tmem45a	8.3179e-52	1.02477	0.734	0.294	2.32885e-47	6.91771e-39	0.911264	0.772	0.333	1.93682e-34	6.91771e-39	1.66358e-51	11
Higd1b	8.89355e-52	1.56478	0.922	0.684	2.49002e-47	8.06106e-19	1.44066	0.861	0.727	2.25694e-14	8.06106e-19	1.77871e-51	11
Gper1	1.12564e-50	1.09544	0.867	0.483	3.15157e-46	3.91205e-32	0.989189	0.861	0.526	1.0953e-27	3.91205e-32	2.25128e-50	11
Ifitm2	5.514e-49	1.01279	0.93	0.77	1.54381e-44	3.42517e-50	1.03452	0.99	0.884	9.5898e-46	5.514e-49	6.85035e-50	11
Itih5	2.42046e-49	1.33645	0.891	0.53	6.7768e-45	2.78363e-40	1.31095	0.891	0.584	7.79361e-36	2.78363e-40	4.84092e-49	11
Rgs4	5.48455e-49	1.33096	0.867	0.537	1.53556e-44	4.78593e-24	1.18802	0.822	0.602	1.33997e-19	4.78593e-24	1.09691e-48	11
Gpc3	2.60471e-48	0.77169	0.633	0.212	7.29266e-44	2.9731e-27	1.08501	0.535	0.189	8.32408e-23	2.9731e-27	5.20942e-48	11
Pdgfrb	2.84303e-48	1.16193	0.906	0.564	7.95991e-44	2.01025e-16	0.724887	0.822	0.631	5.62829e-12	2.01025e-16	5.68606e-48	11
Tpm2	2.88935e-48	0.911057	0.688	0.256	8.08961e-44	6.88291e-46	0.970198	0.663	0.204	1.92708e-41	6.88291e-46	5.77871e-48	11
S1pr3	7.57788e-48	1.01163	0.836	0.445	2.12166e-43	1.30405e-08	0.57068	0.614	0.491	0.000365107	1.30405e-08	1.51558e-47	11
Rgs5	2.01974e-47	1.60794	0.906	0.76	5.65487e-43	7.5794e-21	1.33318	0.871	0.803	2.12208e-16	7.5794e-21	4.03948e-47	11
Pdlim2	2.30204e-47	0.94882	0.852	0.485	6.44524e-43	7.37261e-20	0.801665	0.713	0.503	2.06418e-15	7.37261e-20	4.60407e-47	11
Itgb5	3.01372e-47	0.703808	0.68	0.255	8.43782e-43	1.94934e-24	0.725509	0.624	0.292	5.45775e-20	1.94934e-24	6.02744e-47	11
Sept7	9.1401e-47	1.23128	0.953	0.947	2.55905e-42	7.40787e-23	0.98765	0.95	0.96	2.07406e-18	7.40787e-23	1.82802e-46	11
Tgfb3	9.78102e-47	0.401255	0.273	0.037	2.73849e-42	2.79689e-12	0.288949	0.198	0.051	7.83075e-08	2.79689e-12	1.9562e-46	11
P2ry14	2.93341e-46	1.04618	0.781	0.375	8.21295e-42	5.31083e-20	0.935975	0.673	0.402	1.48693e-15	5.31083e-20	5.86681e-46	11
Kcnj8	6.01358e-46	1.42665	0.898	0.587	1.68368e-41	4.61199e-21	1.28114	0.822	0.654	1.29126e-16	4.61199e-21	1.20272e-45	11
Ccl11	9.22696e-27	0.414781	0.211	0.036	2.58336e-22	7.56848e-46	0.898908	0.366	0.055	2.11902e-41	9.22696e-27	1.5137e-45	11
Sdc2	1.00392e-45	1.02984	0.766	0.377	2.81078e-41	2.33874e-18	0.682996	0.614	0.361	6.54799e-14	2.33874e-18	2.00784e-45	11
Gjc1	1.69595e-45	1.30729	0.898	0.75	4.74832e-41	8.39944e-13	0.982835	0.743	0.784	2.35168e-08	8.39944e-13	3.3919e-45	11
Coro1b	1.97623e-45	1.15159	0.922	0.726	5.53304e-41	4.48454e-24	1.24239	0.891	0.768	1.25558e-19	4.48454e-24	3.95245e-45	11
Bgn	3.02592e-45	0.926565	0.992	0.857	8.47197e-41	1.10851e-28	1.03075	0.921	0.755	3.10361e-24	1.10851e-28	6.05184e-45	11
Igfbp5	5.96729e-45	0.862994	0.164	0.014	1.67072e-40	1.85034e-15	1.16291	0.228	0.055	5.18057e-11	1.85034e-15	1.19346e-44	11
Aldoa	7.1171e-45	1.01006	0.992	0.963	1.99264e-40	5.27728e-16	0.648761	0.941	0.98	1.47753e-11	5.27728e-16	1.42342e-44	11
Gpx8	1.58805e-44	0.845043	0.844	0.488	4.44623e-40	2.31146e-35	1.01182	0.871	0.566	6.47162e-31	2.31146e-35	3.17611e-44	11
Cox4i2	1.62858e-44	1.31476	0.875	0.59	4.55969e-40	6.02e-21	1.13584	0.792	0.641	1.68548e-16	6.02e-21	3.25715e-44	11
Mfge8	2.47396e-44	1.21449	0.969	0.864	6.92659e-40	7.73183e-22	0.887527	0.901	0.851	2.16476e-17	7.73183e-22	4.94792e-44	11
Cox8a	1.2038e-43	0.567924	1	0.997	3.3704e-39	4.74108e-15	0.337819	1	0.997	1.32741e-10	4.74108e-15	2.4076e-43	11
Sept11	2.32733e-43	1.02774	0.898	0.676	6.51605e-39	1.19996e-41	0.984511	0.941	0.755	3.35965e-37	1.19996e-41	4.65466e-43	11
Ppp1r14a	2.65478e-43	1.11791	0.844	0.491	7.43286e-39	8.57196e-19	0.886437	0.693	0.482	2.39998e-14	8.57196e-19	5.30957e-43	11
Col6a2	8.38679e-35	0.696565	0.398	0.101	2.34813e-30	1.12279e-42	0.988876	0.525	0.124	3.14359e-38	8.38679e-35	2.24558e-42	11
Ifitm3	2.00509e-42	1.215	0.922	0.824	5.61384e-38	4.61905e-22	1.03412	0.931	0.932	1.29324e-17	4.61905e-22	4.01017e-42	11
Nbl1	2.10818e-42	1.04418	0.852	0.538	5.90248e-38	1.2235e-14	0.892631	0.723	0.556	3.42557e-10	1.2235e-14	4.21636e-42	11
Plxdc2	2.81857e-42	0.991088	0.75	0.372	7.89144e-38	9.21455e-25	0.723286	0.743	0.433	2.57989e-20	9.21455e-25	5.63715e-42	11
Galk1	3.81218e-42	0.784329	0.75	0.385	1.06733e-37	9.36337e-31	0.831497	0.792	0.475	2.62156e-26	9.36337e-31	7.62435e-42	11
Marcks	3.9142e-42	0.754948	0.984	0.922	1.0959e-37	2.9533e-31	0.72348	1	0.931	8.26865e-27	2.9533e-31	7.8284e-42	11
Gucy1a3	6.63109e-42	1.08943	0.836	0.493	1.85657e-37	6.82001e-21	1.0275	0.723	0.507	1.90947e-16	6.82001e-21	1.32622e-41	11
Laptm4a	9.17092e-42	0.751222	1	0.989	2.56767e-37	3.11014e-32	0.658211	1	0.991	8.70777e-28	3.11014e-32	1.83418e-41	11
Emp3	1.7394e-41	0.931612	0.703	0.325	4.86998e-37	1.52863e-37	1.25695	0.822	0.425	4.27986e-33	1.52863e-37	3.4788e-41	11
Tbxa2r	4.13911e-41	1.0223	0.812	0.474	1.15887e-36	1.22666e-23	0.907516	0.743	0.483	3.43441e-19	1.22666e-23	8.27821e-41	11
Snhg18	4.24583e-41	0.808444	0.555	0.181	1.18875e-36	2.74828e-08	0.356123	0.317	0.151	0.000769463	2.74828e-08	8.49166e-41	11
Col3a1	7.88068e-41	1.56189	0.664	0.271	2.20643e-36	2.29584e-31	2.04698	0.614	0.243	6.4279e-27	2.29584e-31	1.57614e-40	11
Cd248	2.27891e-40	1.04978	0.836	0.496	6.38048e-36	9.96372e-32	1.15844	0.822	0.497	2.78964e-27	9.96372e-32	4.55781e-40	11
Ilk	2.82872e-40	0.771358	0.93	0.81	7.91985e-36	8.44564e-25	0.619674	0.891	0.813	2.36461e-20	8.44564e-25	5.65744e-40	11
Slc25a4	6.36658e-40	0.601691	1	0.984	1.78252e-35	4.77188e-24	0.456993	1	0.987	1.33603e-19	4.77188e-24	1.27332e-39	11
Prdx5	8.30701e-40	0.84673	0.922	0.84	2.3258e-35	2.69426e-34	0.909663	0.95	0.846	7.54338e-30	2.69426e-34	1.6614e-39	11
Heyl	2.74058e-39	0.887406	0.75	0.406	7.67308e-35	1.5281e-19	0.820434	0.703	0.457	4.27838e-15	1.5281e-19	5.48116e-39	11
Tubb2b	3.89853e-39	0.981442	0.852	0.54	1.09151e-34	1.13046e-20	0.681099	0.842	0.675	3.16506e-16	1.13046e-20	7.79705e-39	11
Maged2	1.6129e-35	1.02673	0.852	0.693	4.51579e-31	4.10934e-39	1.00633	0.931	0.69	1.15053e-34	1.6129e-35	8.21868e-39	11
Selenbp1	1.78637e-10	0.454718	0.234	0.09	5.00148e-06	1.32912e-38	0.537094	0.485	0.113	3.72126e-34	1.78637e-10	2.65823e-38	11
Ctsk	2.87377e-38	0.855115	0.453	0.122	8.04599e-34	3.22293e-17	0.469634	0.327	0.098	9.02357e-13	3.22293e-17	5.74755e-38	11
Ifi27	9.64235e-32	0.750139	0.75	0.463	2.69966e-27	8.84327e-38	1.04957	0.861	0.568	2.47594e-33	9.64235e-32	1.76865e-37	11
Abcc9	9.68625e-38	0.955395	0.859	0.557	2.71196e-33	2.96335e-12	0.719414	0.782	0.635	8.29679e-08	2.96335e-12	1.93725e-37	11
Ppib	1.28919e-37	0.633282	0.992	0.982	3.60948e-33	1.13832e-37	0.785269	1	0.98	3.18707e-33	1.28919e-37	2.27664e-37	11
Ednra	5.44987e-37	0.934278	0.742	0.408	1.52586e-32	3.62365e-18	0.741723	0.693	0.457	1.01455e-13	3.62365e-18	1.08997e-36	11
Ugp2	5.63921e-37	0.801962	0.844	0.61	1.57887e-32	7.85625e-16	0.746048	0.733	0.626	2.19959e-11	7.85625e-16	1.12784e-36	11
Pid1	9.43948e-37	0.929963	0.789	0.447	2.64287e-32	6.01271e-24	0.872834	0.762	0.477	1.68344e-19	6.01271e-24	1.8879e-36	11
Mdk	1.82545e-11	0.781414	0.328	0.154	5.11089e-07	1.09532e-36	1.33621	0.564	0.173	3.06668e-32	1.82545e-11	2.19064e-36	11
Meg3	6.44272e-36	1.62728	0.828	0.556	1.80383e-31	8.70849e-34	1.45779	0.96	0.664	2.4382e-29	8.70849e-34	1.28854e-35	11
Nr2f2	9.00065e-36	0.784968	0.836	0.582	2.52e-31	2.02732e-07	0.509993	0.644	0.598	0.0056761	2.02732e-07	1.80013e-35	11
Vstm4	1.76335e-35	0.930076	0.711	0.369	4.93703e-31	3.18607e-12	0.568919	0.564	0.369	8.92035e-08	3.18607e-12	3.5267e-35	11
Sod3	2.09141e-35	0.942961	0.844	0.522	5.85553e-31	1.46174e-07	0.765258	0.644	0.575	0.00409257	1.46174e-07	4.18282e-35	11
Axl	4.82496e-35	0.721355	0.68	0.329	1.35089e-30	4.7923e-15	0.587765	0.584	0.34	1.34175e-10	4.7923e-15	9.64992e-35	11
Tfpi	8.96655e-35	0.850087	0.898	0.794	2.51045e-30	6.49705e-21	0.712743	0.901	0.812	1.81904e-16	6.49705e-21	1.79331e-34	11
Rasgrp2	9.08097e-35	1.02508	0.883	0.736	2.54249e-30	2.18904e-13	0.67957	0.802	0.772	6.12887e-09	2.18904e-13	1.81619e-34	11
Foxs1	1.21074e-34	0.858439	0.695	0.353	3.38982e-30	0.000291552	0.579654	0.436	0.345	1	0.000291552	2.42147e-34	11
Mfap2	1.58723e-34	1.19404	0.781	0.49	4.44392e-30	1.87414e-34	1.27848	0.822	0.493	5.24721e-30	1.87414e-34	3.17445e-34	11
Olfml3	1.29017e-26	0.796359	0.461	0.17	3.61221e-22	5.07296e-34	0.636537	0.574	0.185	1.42033e-29	1.29017e-26	1.01459e-33	11
Wls	7.5405e-34	0.885838	0.797	0.58	2.11119e-29	8.87833e-17	0.639161	0.733	0.598	2.48575e-12	8.87833e-17	1.5081e-33	11
Copz2	3.42292e-33	0.734145	0.711	0.404	9.58348e-29	1.74253e-21	0.679063	0.644	0.355	4.87874e-17	1.74253e-21	6.84583e-33	11
Gucy1b3	3.87696e-33	1.02117	0.734	0.429	1.08547e-28	6.10409e-14	0.802445	0.634	0.447	1.70902e-09	6.10409e-14	7.75393e-33	11
Serpinh1	7.37872e-33	0.488477	1	0.996	2.06589e-28	7.302e-19	0.381185	1	0.989	2.04441e-14	7.302e-19	1.47574e-32	11
Sept9	1.42578e-32	0.767531	0.719	0.451	3.99189e-28	1.02835e-21	0.687889	0.743	0.498	2.87917e-17	1.02835e-21	2.85155e-32	11
Oaz2	1.77668e-32	0.712164	0.93	0.982	4.97436e-28	3.34767e-14	0.577873	0.97	0.96	9.37279e-10	3.34767e-14	3.55337e-32	11
Plat	4.70329e-32	0.765535	0.906	0.844	1.31683e-27	1.51247e-14	0.495566	0.891	0.867	4.23462e-10	1.51247e-14	9.40657e-32	11
Zeb2	9.7975e-32	0.82801	0.711	0.408	2.7431e-27	1.41237e-09	0.652021	0.564	0.449	3.95435e-05	1.41237e-09	1.9595e-31	11
Atp5d	1.1602e-31	0.518688	1	0.986	3.24834e-27	1.91892e-18	0.3003	1	0.989	5.37259e-14	1.91892e-18	2.32041e-31	11
Emilin1	5.06314e-30	0.748939	0.586	0.267	1.41758e-25	1.80565e-31	0.74866	0.653	0.267	5.05547e-27	5.06314e-30	3.61131e-31	11
Col1a2	3.23603e-31	1.54871	0.664	0.352	9.06022e-27	3.20773e-26	2.00835	0.634	0.302	8.981e-22	3.20773e-26	6.47205e-31	11
Anxa5	5.03539e-31	0.642926	0.961	0.924	1.40981e-26	3.56622e-15	0.518363	0.95	0.951	9.98471e-11	3.56622e-15	1.00708e-30	11
Islr	8.61141e-31	0.496091	0.172	0.022	2.41102e-26	5.79916e-20	0.380643	0.178	0.028	1.62365e-15	5.79916e-20	1.72228e-30	11
Oaf	2.13872e-30	0.7812	0.773	0.51	5.98799e-26	4.87414e-15	0.670257	0.713	0.561	1.36466e-10	4.87414e-15	4.27744e-30	11
Cadm4	2.18358e-30	0.739381	0.648	0.339	6.11359e-26	9.82072e-16	0.778252	0.594	0.372	2.74961e-11	9.82072e-16	4.36716e-30	11
Sept4	4.60948e-30	0.848503	0.938	0.959	1.29056e-25	9.50782e-16	0.871237	0.851	0.901	2.662e-11	9.50782e-16	9.21896e-30	11
Adap2	6.44784e-30	0.785136	0.648	0.326	1.80527e-25	1.07596e-05	0.38343	0.436	0.311	0.301246	1.07596e-05	1.28957e-29	11
Hspa2	1.26536e-29	0.886153	0.648	0.333	3.54275e-25	8.16795e-20	0.694538	0.624	0.331	2.28686e-15	8.16795e-20	2.53072e-29	11
Lpar1	1.13811e-16	0.387722	0.258	0.077	3.18648e-12	1.92683e-29	0.554653	0.356	0.077	5.39475e-25	1.13811e-16	3.85367e-29	11
Slc19a1	2.54577e-29	0.95648	0.812	0.535	7.12766e-25	1.23592e-21	0.832632	0.762	0.519	3.46033e-17	1.23592e-21	5.09155e-29	11
Gm14964	5.80142e-19	0.612677	0.586	0.35	1.62428e-14	4.94752e-29	0.868796	0.713	0.359	1.38521e-24	5.80142e-19	9.89504e-29	11
Cnn2	6.79371e-29	0.879862	0.898	0.817	1.9021e-24	4.12065e-19	0.588889	0.851	0.851	1.1537e-14	4.12065e-19	1.35874e-28	11
Mdh1	8.95602e-29	0.630803	0.914	0.818	2.50751e-24	1.76349e-14	0.456012	0.832	0.813	4.93742e-10	1.76349e-14	1.7912e-28	11
Col26a1	5.46544e-08	0.521341	0.297	0.161	0.00153021	1.30569e-28	0.489032	0.416	0.107	3.65568e-24	5.46544e-08	2.61139e-28	11
Gapdh	2.03753e-28	0.54988	1	0.987	5.70469e-24	2.13511e-08	0.312224	0.98	0.995	0.000597789	2.13511e-08	4.07507e-28	11
Tlr12	3.74922e-28	0.628603	0.555	0.244	1.04971e-23	6.7508e-11	0.546802	0.446	0.25	1.89009e-06	6.7508e-11	7.49843e-28	11
Fabp7	1.16561e-27	0.83744	0.594	0.282	3.26347e-23	9.98237e-10	0.734473	0.515	0.354	2.79486e-05	9.98237e-10	2.33122e-27	11
Ift43	1.92346e-27	0.83985	0.695	0.463	5.3853e-23	2.96511e-10	0.566898	0.604	0.488	8.30171e-06	2.96511e-10	3.84692e-27	11
Plce1	3.4419e-27	0.706057	0.617	0.32	9.63664e-23	0.00456847	0.371439	0.396	0.363	1	0.00456847	6.88381e-27	11
Anpep	4.98151e-27	0.620273	0.562	0.258	1.39472e-22	1.35651e-09	0.520954	0.446	0.27	3.79796e-05	1.35651e-09	9.96302e-27	11
Fosb	7.16722e-27	0.797871	0.828	0.634	2.00668e-22	3.227e-06	0.643411	0.683	0.657	0.0903495	3.227e-06	1.43344e-26	11
Tagln2	8.44935e-27	0.606044	1	0.978	2.36565e-22	1.43271e-08	0.344597	0.96	0.985	0.000401131	1.43271e-08	1.68987e-26	11
P3h3	1.11034e-23	0.587614	0.516	0.236	3.10874e-19	1.00804e-26	0.686256	0.594	0.245	2.82231e-22	1.11034e-23	2.01608e-26	11
Col6a3	4.88116e-09	0.281741	0.172	0.058	0.000136663	1.19641e-26	0.348783	0.277	0.051	3.3497e-22	4.88116e-09	2.39281e-26	11
Atp13a5	1.45855e-26	1.02692	0.75	0.505	4.08366e-22	6.06207e-09	0.568179	0.673	0.572	0.000169726	6.06207e-09	2.91711e-26	11
Pgf	1.49327e-26	0.710876	0.383	0.115	4.18087e-22	0.000251023	0.534269	0.406	0.289	1	0.000251023	2.98655e-26	11
Csk	1.85466e-26	0.665422	0.773	0.607	5.19268e-22	2.26959e-06	0.371333	0.624	0.639	0.0635438	2.26959e-06	3.70933e-26	11
Vdac1	1.89089e-26	0.524839	0.914	0.885	5.29411e-22	1.43598e-07	0.306185	0.851	0.91	0.00402046	1.43598e-07	3.78178e-26	11
Lmna	2.12412e-26	0.885867	0.742	0.545	5.9471e-22	3.66917e-16	0.707207	0.772	0.667	1.02729e-11	3.66917e-16	4.24823e-26	11
Ebf1	2.24714e-26	0.874729	0.883	0.868	6.29155e-22	1.21855e-11	0.676126	0.861	0.885	3.4117e-07	1.21855e-11	4.49429e-26	11
Tgfb1i1	2.54782e-26	0.744501	0.797	0.663	7.13338e-22	4.60127e-10	0.549719	0.713	0.708	1.28826e-05	4.60127e-10	5.09564e-26	11
Tpi1	2.78996e-26	0.752524	0.898	0.848	7.81134e-22	1.27649e-12	0.399395	0.941	0.906	3.57391e-08	1.27649e-12	5.57993e-26	11
Efhd2	3.93749e-26	1.07057	0.773	0.616	1.10242e-21	4.04385e-14	0.874914	0.723	0.651	1.1322e-09	4.04385e-14	7.87498e-26	11
Hmgn3	4.114e-26	0.723968	0.734	0.53	1.15184e-21	1.87255e-09	0.656874	0.644	0.568	5.24276e-05	1.87255e-09	8.228e-26	11
Uchl1	4.35476e-26	0.901986	0.812	0.669	1.21925e-21	3.16352e-17	0.810522	0.832	0.797	8.85722e-13	3.16352e-17	8.70952e-26	11
Postn	4.62405e-26	0.628024	0.516	0.215	1.29464e-21	1.30861e-09	0.678558	0.446	0.273	3.66385e-05	1.30861e-09	9.2481e-26	11
Atp5b	6.2987e-26	0.556832	0.992	0.994	1.76351e-21	4.15929e-07	0.353495	1	0.994	0.0116452	4.15929e-07	1.25974e-25	11
Ctsz	3.272e-15	0.554014	0.719	0.685	9.16094e-11	7.76299e-26	0.761489	0.822	0.712	2.17348e-21	3.272e-15	1.5526e-25	11
Cd81	9.68204e-26	0.448865	1	0.999	2.71078e-21	7.3696e-17	0.408279	1	0.999	2.06334e-12	7.3696e-17	1.93641e-25	11
Cthrc1	3.39711e-13	0.803943	0.641	0.55	9.51124e-09	1.01042e-25	1.13609	0.802	0.58	2.82899e-21	3.39711e-13	2.02085e-25	11
Fhl2	1.03275e-25	0.524208	0.391	0.123	2.8915e-21	1.3566e-19	0.432563	0.337	0.092	3.79822e-15	1.3566e-19	2.0655e-25	11
Col5a2	3.01974e-25	0.7024	0.562	0.282	8.45467e-21	9.22374e-20	0.634327	0.624	0.373	2.58246e-15	9.22374e-20	6.03948e-25	11
Mif	4.51676e-25	0.915176	0.961	0.901	1.2646e-20	1.31179e-23	0.814816	0.931	0.94	3.67276e-19	1.31179e-23	9.03352e-25	11
Ptms	5.36047e-25	0.517918	0.922	0.943	1.50083e-20	2.00006e-07	0.325904	0.98	0.946	0.00559977	2.00006e-07	1.07209e-24	11
Fam20a	5.63018e-25	0.461094	0.422	0.147	1.57634e-20	0.0014585	0.269836	0.238	0.151	1	0.0014585	1.12604e-24	11
Pde8b	6.4992e-25	0.715664	0.625	0.358	1.81965e-20	1.90201e-05	0.483685	0.485	0.4	0.532525	1.90201e-05	1.29984e-24	11
Gpc6	8.17976e-08	0.34841	0.297	0.161	0.00229017	6.60831e-25	0.502944	0.495	0.171	1.85019e-20	8.17976e-08	1.32166e-24	11
Il34	1.00208e-24	0.779168	0.602	0.324	2.80562e-20	6.37376e-11	0.469451	0.475	0.259	1.78452e-06	6.37376e-11	2.00416e-24	11
Pcdh18	1.21545e-24	0.628927	0.656	0.386	3.40301e-20	7.03126e-11	0.457455	0.564	0.384	1.96861e-06	7.03126e-11	2.4309e-24	11
Adap2os	1.97607e-24	0.623409	0.523	0.233	5.5326e-20	3.16781e-06	0.449873	0.376	0.243	0.0886923	3.16781e-06	3.95214e-24	11
Prkar1a	2.25373e-24	0.506446	0.961	0.959	6.30999e-20	3.80911e-07	0.32407	0.941	0.964	0.0106648	3.80911e-07	4.50746e-24	11
Traf4	2.68249e-24	0.716418	0.641	0.393	7.51043e-20	0.000180969	0.400266	0.505	0.441	1	0.000180969	5.36498e-24	11
Akap7	2.80796e-24	0.734946	0.695	0.44	7.86174e-20	9.25273e-21	0.740574	0.713	0.455	2.59058e-16	9.25273e-21	5.61593e-24	11
Ptk2	2.97273e-24	0.718139	0.75	0.595	8.32306e-20	0.493476	0.340376	0.446	0.57	1	0.493476	5.94547e-24	11
Pten	3.14139e-24	0.618448	0.82	0.721	8.79526e-20	0.00010234	0.368317	0.663	0.758	1	0.00010234	6.28278e-24	11
Rbm3	6.00486e-24	0.514471	0.992	0.978	1.68124e-19	1.00674e-15	0.368197	1	0.987	2.81866e-11	1.00674e-15	1.20097e-23	11
Zbtb20	6.102e-24	0.696655	0.812	0.682	1.70844e-19	1.14409e-17	0.603894	0.822	0.753	3.20322e-13	1.14409e-17	1.2204e-23	11
Tspan3	8.11917e-19	0.455345	0.859	0.837	2.27321e-14	6.39808e-24	0.590446	0.901	0.818	1.79133e-19	8.11917e-19	1.27962e-23	11
H3f3b	2.59992e-20	0.318865	1	1	7.27927e-16	8.08231e-24	0.400815	1	1	2.26289e-19	2.59992e-20	1.61646e-23	11
Camk1	1.27711e-23	0.644565	0.727	0.547	3.57565e-19	0.00023486	0.322158	0.584	0.609	1	0.00023486	2.55422e-23	11
Slc30a10	1.39257e-23	0.645584	0.523	0.245	3.89893e-19	7.12577e-13	0.553307	0.485	0.271	1.99507e-08	7.12577e-13	2.78515e-23	11
1500009L16Rik	1.43248e-23	0.531547	0.414	0.149	4.01065e-19	1.49681e-06	0.340416	0.257	0.123	0.0419078	1.49681e-06	2.86495e-23	11
Rnd3	1.47939e-23	0.59072	0.516	0.234	4.14199e-19	1.23259e-12	0.437133	0.475	0.252	3.451e-08	1.23259e-12	2.95878e-23	11
Arhgdib	1.5574e-23	0.899957	0.797	0.715	4.36042e-19	1.69433e-15	0.750096	0.802	0.778	4.74377e-11	1.69433e-15	3.11481e-23	11
Trpv2	1.92788e-23	0.599862	0.406	0.145	5.39769e-19	0.0180662	0.251335	0.228	0.164	1	0.0180662	3.85577e-23	11
Atp1b2	2.09053e-23	0.678329	0.703	0.446	5.85307e-19	1.00138e-08	0.479784	0.604	0.467	0.000280365	1.00138e-08	4.18106e-23	11
Lamb1	2.10169e-23	0.558405	0.797	0.615	5.88431e-19	1.31493e-07	0.413313	0.693	0.653	0.00368155	1.31493e-07	4.20338e-23	11
Sepw1	2.88294e-23	0.466173	0.984	0.986	8.07166e-19	4.4267e-07	0.320587	0.99	0.987	0.0123939	4.4267e-07	5.76588e-23	11
Tnfrsf21	3.40083e-23	0.664034	0.773	0.626	9.52165e-19	4.09606e-07	0.473996	0.624	0.584	0.0114681	4.09606e-07	6.80166e-23	11
Ncald	4.87533e-23	0.649521	0.484	0.211	1.365e-18	3.84956e-07	0.421769	0.386	0.243	0.010778	3.84956e-07	9.75067e-23	11
Eif4a1	2.99018e-18	0.407847	1	0.99	8.37192e-14	5.12111e-23	0.517503	1	0.995	1.43381e-18	2.99018e-18	1.02422e-22	11
Prrx1	4.47079e-15	0.485625	0.367	0.16	1.25173e-10	5.862e-23	0.537188	0.436	0.139	1.64124e-18	4.47079e-15	1.1724e-22	11
Oat	1.02597e-11	0.438385	0.539	0.393	2.87251e-07	6.29993e-23	0.546349	0.703	0.408	1.76385e-18	1.02597e-11	1.25999e-22	11
Slc6a13	7.90208e-23	0.834683	0.25	0.057	2.21242e-18	1.83052e-18	0.776184	0.317	0.086	5.12508e-14	1.83052e-18	1.58042e-22	11
Poldip2	3.69043e-15	0.486137	0.688	0.61	1.03325e-10	1.12826e-22	0.613032	0.792	0.573	3.15891e-18	3.69043e-15	2.25652e-22	11
Itga1	1.21146e-22	0.748668	0.727	0.577	3.39185e-18	0.000183471	0.28922	0.564	0.527	1	0.000183471	2.42292e-22	11
Rcn3	1.90405e-19	0.97562	0.594	0.399	5.33096e-15	1.32052e-22	0.832794	0.683	0.415	3.6972e-18	1.90405e-19	2.64105e-22	11
Fos	1.44023e-22	0.869353	0.883	0.882	4.03237e-18	4.21055e-05	0.618665	0.822	0.894	1	4.21055e-05	2.88047e-22	11
Gstk1	1.97482e-22	0.823238	0.617	0.381	5.5291e-18	9.67175e-14	0.742664	0.594	0.401	2.7079e-09	9.67175e-14	3.94964e-22	11
Art3	5.23267e-22	1.1786	0.664	0.44	1.46504e-17	5.02947e-21	1.31593	0.743	0.511	1.40815e-16	5.02947e-21	1.04653e-21	11
Aldh2	5.40986e-22	0.566682	0.688	0.476	1.51465e-17	4.18103e-08	0.6942	0.545	0.449	0.0011706	4.18103e-08	1.08197e-21	11
Naalad2	9.54971e-08	0.399232	0.32	0.188	0.00267373	6.03494e-22	0.56128	0.505	0.2	1.68966e-17	9.54971e-08	1.20699e-21	11
Epb41l2	8.46829e-22	0.54578	0.719	0.526	2.37095e-17	1.85689e-06	0.399797	0.594	0.555	0.0519892	1.85689e-06	1.69366e-21	11
Atp5o	1.06069e-21	0.503289	0.953	0.962	2.96972e-17	4.02631e-11	0.462449	0.931	0.966	1.12729e-06	4.02631e-11	2.12138e-21	11
Tmem178	1.24348e-21	0.529572	0.336	0.105	3.48151e-17	2.07737e-12	0.457534	0.356	0.146	5.81623e-08	2.07737e-12	2.48697e-21	11
Ifitm1	9.23626e-10	0.663148	0.594	0.443	2.58597e-05	1.9578e-21	0.891153	0.772	0.469	5.48146e-17	9.23626e-10	3.91561e-21	11
Slc25a5	2.84195e-21	0.337643	1	0.992	7.95689e-17	2.15026e-08	0.286741	0.98	0.993	0.000602029	2.15026e-08	5.6839e-21	11
Eva1b	3.04234e-21	0.462305	0.984	0.978	8.51794e-17	1.9062e-08	0.295979	0.931	0.966	0.000533699	1.9062e-08	6.08468e-21	11
Aspn	3.21874e-21	0.946763	0.453	0.195	9.01182e-17	1.25203e-05	0.70792	0.347	0.231	0.350542	1.25203e-05	6.43747e-21	11
Ggt5	3.58849e-21	0.648543	0.562	0.308	1.0047e-16	4.6871e-05	0.581927	0.416	0.326	1	4.6871e-05	7.17697e-21	11
Ptov1	2.05585e-12	0.336906	0.805	0.859	5.75597e-08	3.83078e-21	0.482867	0.901	0.825	1.07254e-16	2.05585e-12	7.66155e-21	11
Rrad	4.14405e-21	0.737366	0.469	0.206	1.16025e-16	0.16624	0.292608	0.188	0.165	1	0.16624	8.28809e-21	11
Trpc3	0.000311941	0.366357	0.359	0.298	1	4.18177e-21	0.769526	0.653	0.364	1.17081e-16	0.000311941	8.36354e-21	11
Ccdc12	6.37706e-21	0.46539	0.914	0.891	1.78545e-16	0.000370646	0.262667	0.861	0.912	1	0.000370646	1.27541e-20	11
Col27a1	6.73866e-21	0.455086	0.461	0.2	1.88669e-16	6.82612e-08	0.367202	0.436	0.267	0.00191118	6.82612e-08	1.34773e-20	11
Etfb	9.45834e-21	0.492922	0.875	0.839	2.64815e-16	6.83936e-07	0.288002	0.792	0.845	0.0191488	6.83936e-07	1.89167e-20	11
Sh3glb2	9.64984e-21	0.683192	0.75	0.604	2.70176e-16	2.28603e-07	0.440189	0.614	0.583	0.00640043	2.28603e-07	1.92997e-20	11
Gm13889	1.84532e-20	0.700669	0.719	0.514	5.16652e-16	5.51573e-05	0.565955	0.624	0.591	1	5.51573e-05	3.69063e-20	11
Unc5b	2.3445e-20	0.788904	0.727	0.564	6.56412e-16	0.00435068	0.384803	0.614	0.663	1	0.00435068	4.68899e-20	11
S100a6	2.45145e-20	1.79813	0.281	0.079	6.86357e-16	0.0055582	1.1914	0.337	0.282	1	0.0055582	4.9029e-20	11
C1qtnf6	2.67261e-20	0.577444	0.797	0.627	7.48278e-16	2.02116e-11	0.355134	0.822	0.686	5.65883e-07	2.02116e-11	5.34522e-20	11
Anxa6	2.6866e-20	0.584661	0.812	0.64	7.52193e-16	7.54265e-07	0.39407	0.683	0.687	0.0211179	7.54265e-07	5.37319e-20	11
Des	3.4453e-20	0.883774	0.516	0.266	9.64615e-16	1.16316e-09	0.364371	0.406	0.212	3.25661e-05	1.16316e-09	6.8906e-20	11
Cxxc5	3.71533e-20	0.656918	0.734	0.595	1.04022e-15	7.54215e-10	0.427814	0.733	0.657	2.11165e-05	7.54215e-10	7.43066e-20	11
Cspg4	7.17616e-20	0.575859	0.633	0.397	2.00918e-15	2.76828e-08	0.391725	0.584	0.454	0.000775063	2.76828e-08	1.43523e-19	11
C1qtnf2	8.96341e-20	0.510671	0.43	0.181	2.50958e-15	1.35168e-12	0.522189	0.337	0.134	3.78444e-08	1.35168e-12	1.79268e-19	11
Mylk	2.44723e-19	0.81255	0.664	0.483	6.85176e-15	1.23546e-12	0.728305	0.634	0.468	3.45905e-08	1.23546e-12	4.89447e-19	11
Efemp2	2.83906e-19	0.532879	0.562	0.334	7.94881e-15	2.52204e-09	0.601887	0.525	0.376	7.0612e-05	2.52204e-09	5.67813e-19	11
Cotl1	2.89539e-19	0.638402	0.797	0.722	8.10652e-15	2.81262e-11	0.562872	0.822	0.817	7.87477e-07	2.81262e-11	5.79079e-19	11
Ndrg2	2.97997e-19	0.588754	0.492	0.243	8.34332e-15	3.03406e-10	0.609344	0.436	0.248	8.49477e-06	3.03406e-10	5.95994e-19	11
Ndufs2	2.03148e-12	0.400412	0.906	0.876	5.68774e-08	5.59827e-19	0.445961	0.97	0.88	1.5674e-14	2.03148e-12	1.11965e-18	11
Colec12	8.35538e-05	0.43527	0.375	0.306	1	1.40288e-18	0.55911	0.525	0.236	3.92779e-14	8.35538e-05	2.80576e-18	11
Fam162b	5.41455e-10	0.609771	0.32	0.162	1.51596e-05	1.51412e-18	0.702199	0.376	0.126	4.23925e-14	5.41455e-10	3.02825e-18	11
Arhgef25	1.22907e-13	0.370047	0.344	0.151	3.44116e-09	1.53002e-18	0.4952	0.396	0.136	4.28374e-14	1.22907e-13	3.06003e-18	11
Lama2	1.86609e-18	0.469147	0.43	0.191	5.22467e-14	9.57271e-08	0.289924	0.347	0.178	0.00268017	9.57271e-08	3.73217e-18	11
Gipc1	2.11082e-18	0.487703	0.766	0.712	5.90987e-14	4.1159e-09	0.407049	0.683	0.695	0.000115237	4.1159e-09	4.22163e-18	11
Gja4	2.37071e-18	0.872648	0.719	0.543	6.63751e-14	3.05466e-06	0.510792	0.634	0.54	0.0855244	3.05466e-06	4.74142e-18	11
Itm2b	7.90033e-15	0.409018	1	0.999	2.21193e-10	2.69613e-18	0.482599	1	0.997	7.54862e-14	7.90033e-15	5.39226e-18	11
Nupr1	4.49524e-18	0.938566	0.531	0.295	1.25858e-13	1.46943e-17	1.03749	0.594	0.351	4.11411e-13	1.46943e-17	8.99049e-18	11
Asph	4.99855e-18	0.791308	0.547	0.323	1.3995e-13	3.08732e-16	0.908597	0.604	0.375	8.64387e-12	3.08732e-16	9.99711e-18	11
Nrxn2	2.08992e-12	0.532959	0.391	0.208	5.85136e-08	5.69467e-18	0.493141	0.495	0.216	1.59439e-13	2.08992e-12	1.13893e-17	11
Hic1	6.10406e-18	0.590262	0.742	0.653	1.70901e-13	2.78441e-12	0.529476	0.743	0.671	7.7958e-08	2.78441e-12	1.22081e-17	11
Prrx2	7.50456e-18	0.464536	0.383	0.157	2.10113e-13	6.04268e-09	0.334048	0.347	0.174	0.000169183	6.04268e-09	1.50091e-17	11
Serpine2	8.21455e-18	0.808775	0.766	0.677	2.29991e-13	1.7294e-11	0.597919	0.733	0.644	4.84196e-07	1.7294e-11	1.64291e-17	11
Kcne4	9.57815e-18	0.602624	0.406	0.177	2.68169e-13	8.85216e-06	0.340343	0.327	0.193	0.247843	8.85216e-06	1.91563e-17	11
Cygb	1.00702e-06	0.432149	0.273	0.15	0.0281945	1.1961e-17	0.809709	0.495	0.218	3.34883e-13	1.00702e-06	2.39219e-17	11
Armcx3	3.8219e-06	0.344641	0.539	0.538	0.107006	1.34459e-17	0.525838	0.723	0.574	3.76459e-13	3.8219e-06	2.68918e-17	11
Crip1	1.7263e-17	1.4607	0.656	0.513	4.83331e-13	0.00029712	0.465242	0.634	0.618	1	0.00029712	3.45261e-17	11
F2r	2.15272e-17	0.649728	0.57	0.361	6.02719e-13	0.00440846	0.403101	0.436	0.415	1	0.00440846	4.30545e-17	11
Tpm4	2.30758e-17	0.406667	0.992	0.997	6.46077e-13	5.6295e-10	0.290547	0.99	0.99	1.57615e-05	5.6295e-10	4.61517e-17	11
Selm	2.48709e-17	0.469742	0.93	0.955	6.96335e-13	8.72001e-14	0.457865	0.96	0.934	2.44143e-09	8.72001e-14	4.97418e-17	11
Arf4	2.74401e-17	0.421678	0.906	0.932	7.68269e-13	1.55033e-09	0.272147	0.911	0.945	4.34063e-05	1.55033e-09	5.48803e-17	11
Ckb	4.07063e-09	0.535988	0.602	0.553	0.00011397	3.45371e-17	0.709739	0.762	0.656	9.6697e-13	4.07063e-09	6.90742e-17	11
Zfp385a	3.57415e-17	0.377679	0.359	0.14	1.00069e-12	1.19287e-05	0.319773	0.307	0.177	0.333979	1.19287e-05	7.1483e-17	11
Cryab	4.2966e-17	0.962683	0.477	0.238	1.20296e-12	0.00455204	0.336904	0.248	0.161	1	0.00455204	8.59321e-17	11
Tbx18	4.92063e-17	0.721493	0.445	0.218	1.37768e-12	1.15645e-13	0.600039	0.426	0.192	3.23782e-09	1.15645e-13	9.84125e-17	11
Atp5a1	6.00962e-17	0.465344	0.969	0.975	1.68257e-12	3.71532e-09	0.367223	0.97	0.974	0.000104022	3.71532e-09	1.20192e-16	11
Mmp14	7.95494e-17	0.608784	0.594	0.416	2.22722e-12	2.90946e-07	0.421706	0.564	0.496	0.0081459	2.90946e-07	1.59099e-16	11
Hrct1	9.42861e-17	0.677699	0.625	0.477	2.63982e-12	0.548061	0.262372	0.386	0.499	1	0.548061	1.88572e-16	11
Pik3r1	9.93634e-17	0.50744	0.68	0.535	2.78198e-12	2.1175e-08	0.4563	0.653	0.573	0.000592859	2.1175e-08	1.98727e-16	11
Ecm2	9.95645e-17	0.597495	0.461	0.237	2.78761e-12	3.75873e-08	0.345026	0.396	0.23	0.00105237	3.75873e-08	1.99129e-16	11
Loxl3	9.98515e-17	0.454672	0.398	0.174	2.79564e-12	1.17161e-05	0.346491	0.287	0.161	0.328027	1.17161e-05	1.99703e-16	11
Armcx2	6.92091e-14	0.570086	0.641	0.561	1.93772e-09	1.89041e-16	0.65681	0.723	0.592	5.29277e-12	6.92091e-14	3.78082e-16	11
Prdx4	0.000206058	0.453664	0.609	0.663	1	2.70702e-16	0.476311	0.802	0.669	7.57912e-12	0.000206058	5.41405e-16	11
Nenf	6.84436e-14	0.428199	0.836	0.818	1.91628e-09	2.84497e-16	0.544842	0.881	0.806	7.96536e-12	6.84436e-14	5.68995e-16	11
Arhgap42	3.60734e-16	0.692442	0.531	0.333	1.00998e-11	3.51652e-08	0.565347	0.515	0.377	0.000984556	3.51652e-08	7.21469e-16	11
Rab13	3.86112e-16	0.458848	0.664	0.534	1.08104e-11	0.102003	0.302164	0.485	0.579	1	0.102003	7.72224e-16	11
Dact1	4.37922e-16	0.455191	0.359	0.148	1.22609e-11	2.97516e-07	0.313405	0.287	0.143	0.00832986	2.97516e-07	8.75843e-16	11
Uqcrc1	4.64952e-16	0.446833	0.953	0.933	1.30177e-11	1.13917e-08	0.390981	0.921	0.934	0.000318946	1.13917e-08	9.29903e-16	11
Calm3	7.53554e-08	0.320911	0.898	0.944	0.0021098	5.62691e-16	0.477672	0.921	0.947	1.57542e-11	7.53554e-08	1.12538e-15	11
Cped1	2.83578e-12	0.352291	0.25	0.091	7.9396e-08	6.15774e-16	0.408554	0.327	0.103	1.72404e-11	2.83578e-12	1.23155e-15	11
Tuba1a	7.91823e-16	0.477575	1	0.994	2.21695e-11	1.69412e-05	0.291477	1	0.991	0.474319	1.69412e-05	1.58365e-15	11
Rdh10	5.14712e-12	0.620961	0.406	0.226	1.44109e-07	1.00355e-15	0.679285	0.525	0.272	2.80973e-11	5.14712e-12	2.00709e-15	11
Lrp1	4.35922e-06	0.410583	0.383	0.278	0.122049	1.97662e-15	0.646569	0.535	0.285	5.53414e-11	4.35922e-06	3.95324e-15	11
Tmem86a	3.8592e-08	0.421665	0.5	0.41	0.0010805	2.11298e-15	0.541631	0.614	0.392	5.91593e-11	3.8592e-08	4.22597e-15	11
Dse	2.25288e-15	0.388784	0.336	0.134	6.30761e-11	0.00023999	0.261501	0.228	0.13	1	0.00023999	4.50576e-15	11
Ccdc80	2.46269e-15	0.432964	0.352	0.143	6.89504e-11	2.62615e-13	0.440847	0.356	0.137	7.35269e-09	2.62615e-13	4.92538e-15	11
Gadd45b	2.61257e-15	0.77217	0.547	0.365	7.31467e-11	0.000307005	0.518447	0.455	0.385	1	0.000307005	5.22514e-15	11
Txndc5	4.82152e-09	0.45017	0.547	0.482	0.000134993	3.74367e-15	0.552367	0.644	0.45	1.04815e-10	4.82152e-09	7.48735e-15	11
Ank2	4.14946e-15	0.575227	0.453	0.24	1.16177e-10	3.39097e-06	0.404157	0.426	0.317	0.0949404	3.39097e-06	8.29892e-15	11
Dbn1	4.70449e-15	0.550306	0.547	0.361	1.31716e-10	1.39025e-10	0.556355	0.604	0.461	3.89243e-06	1.39025e-10	9.40898e-15	11
Tubb4a	4.86524e-15	0.461249	0.375	0.169	1.36217e-10	0.00198569	0.326544	0.277	0.196	1	0.00198569	9.73048e-15	11
Pald1	5.31068e-15	0.546257	0.727	0.646	1.48688e-10	0.00100426	0.336183	0.604	0.648	1	0.00100426	1.06214e-14	11
Swi5	2.60989e-13	0.300292	0.914	0.917	7.30716e-09	7.40917e-15	0.389554	0.99	0.931	2.07442e-10	2.60989e-13	1.48183e-14	11
Shisa4	9.70738e-11	0.314426	0.289	0.129	2.71787e-06	9.37648e-15	0.394374	0.347	0.122	2.62523e-10	9.70738e-11	1.8753e-14	11
Nodal	1.53143e-14	0.957428	0.438	0.234	4.28771e-10	1.71503e-08	1.03085	0.446	0.301	0.000480175	1.71503e-08	3.06287e-14	11
Plxdc1	1.67843e-14	0.5614	0.484	0.282	4.69927e-10	6.84213e-06	0.404168	0.376	0.26	0.191566	6.84213e-06	3.35686e-14	11
Phyh	2.42309e-14	0.3777	0.352	0.152	6.78417e-10	2.98468e-07	0.28269	0.277	0.131	0.0083565	2.98468e-07	4.84618e-14	11
Cebpb	3.77234e-14	0.65736	0.57	0.403	1.05618e-09	3.19527e-05	0.417004	0.465	0.382	0.894612	3.19527e-05	7.54467e-14	11
Acat1	4.36609e-14	0.466922	0.719	0.688	1.22242e-09	3.1923e-07	0.39921	0.683	0.67	0.0089378	3.1923e-07	8.73219e-14	11
Snai1	4.40163e-14	0.353475	0.289	0.107	1.23237e-09	2.89945e-13	0.318912	0.307	0.107	8.11788e-09	2.89945e-13	8.80325e-14	11
Btg1	4.43151e-14	0.633828	0.93	0.924	1.24073e-09	3.58225e-12	0.455092	0.95	0.93	1.00296e-07	3.58225e-12	8.86301e-14	11
Angptl2	4.63144e-08	0.345971	0.305	0.165	0.00129671	4.7927e-14	0.436984	0.416	0.181	1.34186e-09	4.63144e-08	9.58539e-14	11
Malat1	4.25707e-11	0.337175	1	1	1.19189e-06	5.1481e-14	0.392024	1	1	1.44137e-09	4.25707e-11	1.02962e-13	11
Ctsb	1.44364e-10	0.473384	0.812	0.833	4.0419e-06	5.22532e-14	0.606136	0.832	0.849	1.46299e-09	1.44364e-10	1.04506e-13	11
Sh2b3	6.25244e-14	0.563604	0.641	0.559	1.75056e-09	0.00100316	0.35735	0.574	0.615	1	0.00100316	1.25049e-13	11
Impdh2	2.7934e-08	0.367152	0.758	0.797	0.000782095	6.83867e-14	0.398711	0.842	0.819	1.91469e-09	2.7934e-08	1.36773e-13	11
Gng2	1.15222e-08	0.553743	0.609	0.587	0.000322598	6.9826e-14	0.490208	0.733	0.579	1.95499e-09	1.15222e-08	1.39652e-13	11
Rcsd1	7.00882e-14	0.543162	0.656	0.564	1.96233e-09	3.93702e-12	0.603647	0.693	0.569	1.10229e-07	3.93702e-12	1.40176e-13	11
Dtx3	7.21998e-14	0.532601	0.641	0.524	2.02145e-09	5.9028e-10	0.581402	0.644	0.548	1.65267e-05	5.9028e-10	1.444e-13	11
Zic4	8.75099e-14	0.497248	0.453	0.255	2.4501e-09	2.36458e-09	0.46008	0.426	0.248	6.62036e-05	2.36458e-09	1.7502e-13	11
Sfrp2	1.2749e-10	0.560857	0.43	0.26	3.56946e-06	8.78141e-14	0.975025	0.634	0.434	2.45862e-09	1.2749e-10	1.75628e-13	11
Nxph4	8.98113e-14	0.363557	0.328	0.137	2.51454e-09	8.98943e-13	0.350503	0.356	0.144	2.51686e-08	8.98943e-13	1.79623e-13	11
Ssr3	1.51944e-13	0.419414	0.852	0.86	4.25412e-09	3.80179e-09	0.408053	0.822	0.872	0.000106442	3.80179e-09	3.03887e-13	11
Kcnmb1	6.36943e-10	0.4077	0.344	0.184	1.78331e-05	1.64862e-13	0.516113	0.396	0.174	4.61582e-09	6.36943e-10	3.29725e-13	11
Fam107b	1.65165e-13	0.486344	0.547	0.376	4.62428e-09	1.22907e-06	0.413601	0.505	0.426	0.0344115	1.22907e-06	3.30329e-13	11
Dnpep	1.81452e-13	0.529591	0.695	0.652	5.08028e-09	7.80733e-07	0.49225	0.634	0.667	0.021859	7.80733e-07	3.62903e-13	11
Tm4sf1	1.90417e-13	0.641355	0.773	0.71	5.33129e-09	2.0776e-10	0.371642	0.861	0.823	5.81687e-06	2.0776e-10	3.80834e-13	11
Vcl	2.39316e-13	0.488027	0.641	0.538	6.70038e-09	0.00214605	0.358066	0.525	0.558	1	0.00214605	4.78633e-13	11
Rcn1	2.56886e-13	0.569181	0.555	0.408	7.19228e-09	0.000570649	0.550455	0.446	0.427	1	0.000570649	5.13771e-13	11
Pgls	1.02785e-08	0.273189	0.781	0.825	0.000287776	5.01639e-13	0.341857	0.901	0.83	1.40449e-08	1.02785e-08	1.00328e-12	11
Rasl11a	6.10335e-13	0.567571	0.43	0.237	1.70881e-08	0.000252621	0.480652	0.277	0.178	1	0.000252621	1.22067e-12	11
Afap1l2	6.90514e-13	0.586585	0.5	0.341	1.9333e-08	0.0265018	0.250592	0.347	0.313	1	0.0265018	1.38103e-12	11
Chpf	7.06244e-13	0.373821	0.336	0.151	1.97734e-08	1.09429e-09	0.316377	0.356	0.171	3.06378e-05	1.09429e-09	1.41249e-12	11
Cyth3	7.18748e-13	0.494256	0.547	0.398	2.01235e-08	7.05227e-12	0.479502	0.624	0.442	1.9745e-07	7.05227e-12	1.4375e-12	11
Ctsc	6.89921e-12	0.53084	0.406	0.23	1.93164e-07	7.72899e-13	0.64124	0.455	0.24	2.16396e-08	6.89921e-12	1.5458e-12	11
Zcchc24	8.90153e-13	0.569711	0.422	0.239	2.49225e-08	0.00329379	0.307561	0.356	0.301	1	0.00329379	1.78031e-12	11
Ndufa13	1.43111e-12	0.338232	0.961	0.979	4.00682e-08	2.2583e-08	0.295883	0.99	0.979	0.00063228	2.2583e-08	2.86222e-12	11
Esd	0.000279997	0.259576	0.719	0.843	1	1.44114e-12	0.422716	0.822	0.856	4.03489e-08	0.000279997	2.88227e-12	11
Kdelr3	7.05828e-09	0.401283	0.258	0.119	0.000197618	1.53876e-12	0.424082	0.406	0.188	4.30822e-08	7.05828e-09	3.07752e-12	11
Rnh1	1.69797e-12	0.413376	0.641	0.548	4.75398e-08	0.000136096	0.37597	0.574	0.588	1	0.000136096	3.39594e-12	11
Ptk7	1.78285e-12	0.391392	0.414	0.228	4.99162e-08	0.000230949	0.434308	0.356	0.281	1	0.000230949	3.56569e-12	11
Emp1	2.07014e-12	0.253996	0.148	0.036	5.79597e-08	0.00533304	0.418551	0.277	0.203	1	0.00533304	4.14028e-12	11
Ppp1cc	2.67844e-12	0.424762	0.906	0.926	7.4991e-08	1.18819e-09	0.326793	0.941	0.953	3.32671e-05	1.18819e-09	5.35689e-12	11
Pdlim1	2.77606e-12	0.559171	0.391	0.206	7.77241e-08	4.83223e-10	0.4086	0.455	0.253	1.35293e-05	4.83223e-10	5.55211e-12	11
Bmp1	0.000113099	0.429241	0.414	0.367	1	2.82005e-12	0.60042	0.604	0.447	7.89559e-08	0.000113099	5.64011e-12	11
Gpsm3	2.8333e-12	0.451613	0.586	0.458	7.93269e-08	7.1314e-05	0.55121	0.554	0.523	1	7.1314e-05	5.66661e-12	11
Nr1h3	4.62703e-07	0.415871	0.359	0.244	0.0129548	3.59438e-12	0.485465	0.495	0.282	1.00635e-07	4.62703e-07	7.18876e-12	11
Txn2	3.77509e-12	0.340427	0.836	0.878	1.05695e-07	3.29392e-07	0.368867	0.861	0.903	0.00922231	3.29392e-07	7.55018e-12	11
Tagln3	4.32022e-12	0.480688	0.461	0.284	1.20957e-07	1.97748e-07	0.471311	0.455	0.314	0.00553654	1.97748e-07	8.64044e-12	11
Vimp	4.46143e-12	0.377333	0.781	0.736	1.24911e-07	8.37088e-07	0.25704	0.713	0.75	0.0234368	8.37088e-07	8.92286e-12	11
Ost4	4.54374e-12	0.324201	0.953	0.952	1.27216e-07	3.94127e-08	0.325741	0.941	0.964	0.00110348	3.94127e-08	9.08748e-12	11
Itgb1	4.72491e-12	0.339264	0.953	0.97	1.32288e-07	2.32928e-09	0.27198	0.95	0.977	6.52153e-05	2.32928e-09	9.44982e-12	11
Pofut2	9.75075e-07	0.370928	0.609	0.64	0.0273002	5.50995e-12	0.400511	0.723	0.646	1.54267e-07	9.75075e-07	1.10199e-11	11
G0s2	7.07797e-12	0.727457	0.422	0.246	1.98169e-07	1.03266e-10	0.467847	0.465	0.262	2.89125e-06	1.03266e-10	1.41559e-11	11
Tpst1	1.62899e-06	0.403092	0.531	0.523	0.0456085	7.11175e-12	0.51058	0.614	0.47	1.99115e-07	1.62899e-06	1.42235e-11	11
Nt5dc2	8.0699e-12	0.504235	0.594	0.48	2.25941e-07	5.63645e-05	0.307071	0.535	0.511	1	5.63645e-05	1.61398e-11	11
Gpm6b	0.00761303	0.390798	0.391	0.391	1	8.25355e-12	0.590471	0.574	0.405	2.31083e-07	0.00761303	1.65071e-11	11
Emid1	2.06103e-11	0.376545	0.266	0.106	5.77048e-07	9.61966e-12	0.392852	0.297	0.109	2.69331e-07	2.06103e-11	1.92393e-11	11
Lrpap1	1.05963e-11	0.483575	0.664	0.64	2.96676e-07	9.1263e-08	0.386346	0.673	0.635	0.00255518	9.1263e-08	2.11926e-11	11
Cd302	3.62174e-07	0.410651	0.492	0.427	0.0101402	1.32195e-11	0.520665	0.604	0.446	3.70121e-07	3.62174e-07	2.64391e-11	11
Marcksl1	1.32379e-11	0.357765	0.891	0.826	3.70634e-07	0.000194861	0.257625	0.901	0.892	1	0.000194861	2.64757e-11	11
Tceal8	2.07772e-09	0.389361	0.75	0.767	5.81719e-05	1.59308e-11	0.382747	0.792	0.802	4.4603e-07	2.07772e-09	3.18616e-11	11
Dlk1	1.67434e-11	1.45272	0.352	0.171	4.68781e-07	4.20762e-08	1.44626	0.446	0.278	0.00117805	4.20762e-08	3.34868e-11	11
Mir143hg	1.81668e-11	0.454133	0.445	0.263	5.08634e-07	1.5525e-09	0.500548	0.436	0.256	4.34668e-05	1.5525e-09	3.63336e-11	11
Foxd1	1.91422e-11	0.548196	0.477	0.314	5.35943e-07	0.000352745	0.289277	0.396	0.31	1	0.000352745	3.82844e-11	11
Aldh7a1	0.0020963	0.317482	0.305	0.248	1	2.37226e-11	0.449147	0.446	0.236	6.64186e-07	0.0020963	4.74453e-11	11
Ppfibp2	8.80316e-10	0.438403	0.312	0.158	2.46471e-05	2.9425e-11	0.269339	0.347	0.143	8.23841e-07	8.80316e-10	5.885e-11	11
Pkm	2.96751e-11	0.554596	0.969	0.993	8.30842e-07	5.45077e-11	0.43168	0.96	0.99	1.52611e-06	5.45077e-11	5.93501e-11	11
Nid1	3.63843e-11	0.408161	0.898	0.923	1.01869e-06	1.44825e-06	0.312489	0.921	0.91	0.040548	1.44825e-06	7.27685e-11	11
Fkbp10	3.65514e-11	0.46813	0.656	0.625	1.02337e-06	5.19348e-09	0.439831	0.673	0.634	0.000145407	5.19348e-09	7.31028e-11	11
Zdhhc1	5.94294e-11	0.472988	0.469	0.312	1.66391e-06	2.10309e-06	0.438838	0.495	0.389	0.0588822	2.10309e-06	1.18859e-10	11
Egr1	6.25475e-11	0.52298	0.812	0.728	1.75121e-06	0.000627136	0.333944	0.802	0.786	1	0.000627136	1.25095e-10	11
Morf4l2	6.87596e-11	0.419156	0.891	0.917	1.92513e-06	0.00041067	0.291679	0.861	0.932	1	0.00041067	1.37519e-10	11
Eps8	7.6916e-11	0.444241	0.461	0.315	2.15349e-06	1.20193e-05	0.330329	0.455	0.353	0.336517	1.20193e-05	1.53832e-10	11
Itm2c	7.8e-11	0.452442	0.828	0.844	2.18384e-06	1.19906e-09	0.607512	0.851	0.85	3.35714e-05	1.19906e-09	1.56e-10	11
Klhl23	0.000145431	0.319378	0.469	0.445	1	9.60984e-11	0.549412	0.564	0.418	2.69056e-06	0.000145431	1.92197e-10	11
Bmp5	1.00776e-10	0.326405	0.266	0.111	2.82152e-06	3.44003e-08	0.346023	0.287	0.133	0.000963139	3.44003e-08	2.01552e-10	11
Zfp703	1.06932e-10	0.496063	0.531	0.406	2.99389e-06	0.00513423	0.352006	0.455	0.458	1	0.00513423	2.13864e-10	11
Taok3	1.18721e-10	0.357429	0.352	0.184	3.32396e-06	7.07007e-05	0.250435	0.327	0.216	1	7.07007e-05	2.37443e-10	11
Hsp90b1	6.43313e-09	0.415706	0.875	0.933	0.000180115	1.3771e-10	0.320593	0.941	0.935	3.8556e-06	6.43313e-09	2.7542e-10	11
Rsu1	1.44237e-10	0.330504	0.898	0.9	4.03835e-06	1.05258e-05	0.405874	0.743	0.897	0.294703	1.05258e-05	2.88474e-10	11
Ndufs7	1.51372e-10	0.425666	0.844	0.883	4.23811e-06	1.1068e-07	0.359888	0.891	0.874	0.00309883	1.1068e-07	3.02744e-10	11
Mpc2	1.54056e-10	0.331865	0.805	0.818	4.31326e-06	1.73048e-07	0.32332	0.782	0.836	0.00484499	1.73048e-07	3.08112e-10	11
Hspa1a	1.63858e-10	0.884611	0.469	0.303	4.5877e-06	3.87857e-09	1.04242	0.594	0.456	0.000108592	3.87857e-09	3.27716e-10	11
Ggt1	1.73541e-10	0.40439	0.281	0.125	4.85879e-06	0.0175249	0.337425	0.208	0.144	1	0.0175249	3.47081e-10	11
Sh3bgrl	2.07002e-10	0.435356	0.766	0.808	5.79563e-06	0.0472758	0.264766	0.663	0.842	1	0.0472758	4.14003e-10	11
Spry2	2.33503e-10	0.55278	0.414	0.243	6.53761e-06	0.000164182	0.425534	0.386	0.281	1	0.000164182	4.67006e-10	11
Tspan7	3.28642e-10	0.415369	0.32	0.16	9.20131e-06	6.32223e-10	0.406993	0.366	0.183	1.7701e-05	6.32223e-10	6.57283e-10	11
Notch3	3.74644e-10	0.633255	0.555	0.446	1.04893e-05	1.73789e-06	0.419171	0.554	0.453	0.0486575	1.73789e-06	7.49287e-10	11
Atp5k	3.79382e-10	0.355365	0.906	0.967	1.06219e-05	6.30583e-08	0.298231	0.99	0.958	0.00176551	6.30583e-08	7.58763e-10	11
Gas1	7.12518e-08	0.284297	0.125	0.038	0.00199491	3.95534e-10	0.592755	0.149	0.036	1.10742e-05	7.12518e-08	7.91068e-10	11
Abhd14a	5.22392e-10	0.394926	0.406	0.254	1.46259e-05	0.00083782	0.306986	0.356	0.288	1	0.00083782	1.04478e-09	11
Vasp	2.54553e-06	0.41362	0.789	0.932	0.0712698	5.75246e-10	0.415505	0.901	0.937	1.61057e-05	2.54553e-06	1.15049e-09	11
Sdhb	1.55599e-09	0.255311	0.867	0.874	4.35646e-05	6.71979e-10	0.42611	0.851	0.884	1.88141e-05	1.55599e-09	1.34396e-09	11
Ndn	1.00765e-08	0.407197	0.406	0.266	0.000282122	8.25978e-10	0.568671	0.495	0.322	2.31257e-05	1.00765e-08	1.65196e-09	11
Mgat2	7.1251e-05	0.264354	0.633	0.734	1	8.51458e-10	0.316327	0.802	0.747	2.38391e-05	7.1251e-05	1.70292e-09	11
Mapk8ip1	9.01608e-10	0.322965	0.305	0.15	2.52432e-05	6.95826e-07	0.290427	0.317	0.17	0.0194817	6.95826e-07	1.80322e-09	11
Dennd2a	1.88421e-09	0.354471	0.422	0.276	5.2754e-05	1.00739e-09	0.430245	0.495	0.329	2.8205e-05	1.88421e-09	2.01479e-09	11
Pebp1	1.10219e-09	0.270638	0.883	0.93	3.08591e-05	1.05016e-09	0.323337	0.881	0.936	2.94025e-05	1.10219e-09	2.10033e-09	11
Ak3	1.81699e-06	0.483487	0.57	0.588	0.0508721	1.1026e-09	0.571822	0.663	0.616	3.08706e-05	1.81699e-06	2.2052e-09	11
Cdc42ep5	2.79814e-06	0.314903	0.398	0.3	0.0783422	1.2249e-09	0.473446	0.495	0.328	3.42947e-05	2.79814e-06	2.44979e-09	11
Fjx1	9.09352e-05	0.29376	0.297	0.205	1	1.52786e-09	0.538419	0.396	0.219	4.27769e-05	9.09352e-05	3.05571e-09	11
Vasn	1.86479e-09	0.31484	0.312	0.16	5.22104e-05	8.18901e-07	0.281116	0.307	0.163	0.0229276	8.18901e-07	3.72958e-09	11
Suclg2	2.19543e-09	0.591781	0.555	0.497	6.14678e-05	5.01854e-07	0.525984	0.584	0.529	0.0140509	5.01854e-07	4.39087e-09	11
2210016F16Rik	0.000414096	0.264738	0.289	0.215	1	2.31941e-09	0.421088	0.396	0.216	6.49389e-05	0.000414096	4.63883e-09	11
Ldha	2.47312e-09	0.511717	0.953	0.975	6.92425e-05	0.000400765	0.289393	0.99	0.991	1	0.000400765	4.94625e-09	11
Eef1d	1.35286e-06	0.280581	0.836	0.896	0.0378774	2.76555e-09	0.34544	0.871	0.916	7.74299e-05	1.35286e-06	5.5311e-09	11
Cisd3	2.97222e-09	0.464563	0.523	0.433	8.32163e-05	0.00187223	0.310418	0.515	0.508	1	0.00187223	5.94445e-09	11
Il13ra1	3.01102e-09	0.382113	0.461	0.329	8.43026e-05	0.00257114	0.305845	0.396	0.348	1	0.00257114	6.02205e-09	11
Nts	3.62369e-09	1.10452	0.391	0.241	0.000101456	1.20457e-07	0.964242	0.505	0.333	0.00337255	1.20457e-07	7.24739e-09	11
Tbx2	3.65871e-09	0.457884	0.445	0.31	0.000102437	0.000632777	0.290481	0.386	0.31	1	0.000632777	7.31742e-09	11
Lims1	3.97362e-09	0.250897	0.859	0.87	0.000111253	1.42203e-08	0.398083	0.812	0.855	0.00039814	1.42203e-08	7.94723e-09	11
Fads3	4.22888e-09	0.53819	0.391	0.246	0.0001184	5.99699e-08	0.397369	0.396	0.229	0.00167904	5.99699e-08	8.45776e-09	11
Pelo	0.000168684	0.295841	0.617	0.658	1	4.37681e-09	0.485565	0.733	0.665	0.000122542	0.000168684	8.75362e-09	11
Rgs10	4.4325e-09	0.577627	0.469	0.348	0.000124101	0.00883909	0.289438	0.446	0.406	1	0.00883909	8.86499e-09	11
Cxcl1	6.74534e-09	0.620183	0.258	0.115	0.000188856	0.00482168	0.971841	0.337	0.278	1	0.00482168	1.34907e-08	11
Pik3cd	7.84603e-09	0.44689	0.383	0.241	0.000219673	0.0427869	0.257903	0.277	0.25	1	0.0427869	1.56921e-08	11
Spcs1	1.08227e-07	0.313878	0.906	0.931	0.00303013	8.48723e-09	0.274045	0.96	0.944	0.000237626	1.08227e-07	1.69745e-08	11
Hspa5	9.28253e-09	0.562986	0.945	0.944	0.000259892	1.71741e-05	0.252427	0.871	0.935	0.480841	1.71741e-05	1.85651e-08	11
Atpif1	8.86669e-08	0.263995	0.93	0.959	0.0024825	1.02585e-08	0.300485	0.99	0.974	0.000287217	8.86669e-08	2.05169e-08	11
Hsd17b10	1.06588e-08	0.299655	0.688	0.693	0.000298426	4.53189e-06	0.284929	0.683	0.683	0.126884	4.53189e-06	2.13177e-08	11
Xpc	1.67298e-08	0.498163	0.422	0.298	0.000468402	0.0686957	0.292611	0.327	0.296	1	0.0686957	3.34597e-08	11
Cysltr1	1.70028e-08	0.306987	0.219	0.091	0.000476043	4.20553e-07	0.370827	0.287	0.144	0.0117747	4.20553e-07	3.40055e-08	11
Ccl2	7.09892e-06	0.314203	0.109	0.037	0.198756	2.32261e-08	0.409785	0.178	0.056	0.000650285	7.09892e-06	4.64522e-08	11
Ccrl2	2.42187e-08	0.447186	0.391	0.254	0.000678076	0.00153638	0.259367	0.347	0.277	1	0.00153638	4.84375e-08	11
Pitpnc1	2.5263e-08	0.577557	0.617	0.623	0.000707315	5.13443e-05	0.443443	0.614	0.665	1	5.13443e-05	5.05261e-08	11
Loxl2	1.39214e-06	0.383404	0.367	0.256	0.0389772	2.54245e-08	0.424111	0.485	0.337	0.000711835	1.39214e-06	5.0849e-08	11
Psmd13	0.000130383	0.272	0.656	0.744	1	2.76488e-08	0.404003	0.733	0.78	0.00077411	0.000130383	5.52975e-08	11
Ddah2	1.02709e-05	0.308363	0.695	0.729	0.287565	2.81546e-08	0.393263	0.782	0.808	0.000788274	1.02709e-05	5.63093e-08	11
Maged1	0.00169714	0.459433	0.516	0.629	1	3.28991e-08	0.499266	0.653	0.619	0.00092111	0.00169714	6.57983e-08	11
Flna	8.24082e-07	0.374741	0.656	0.655	0.0230726	3.61361e-08	0.389775	0.713	0.717	0.00101174	8.24082e-07	7.22722e-08	11
Perp	4.0317e-08	0.529437	0.359	0.217	0.0011288	0.0470706	0.38479	0.267	0.229	1	0.0470706	8.0634e-08	11
Plod2	4.05893e-08	0.477937	0.32	0.182	0.00113642	9.67118e-06	0.277399	0.376	0.239	0.270774	9.67118e-06	8.11786e-08	11
Cope	3.09403e-07	0.321061	0.852	0.888	0.00866267	5.05128e-08	0.306897	0.861	0.901	0.00141426	3.09403e-07	1.01026e-07	11
Spry1	3.22002e-06	0.473633	0.594	0.61	0.090154	5.61182e-08	0.515959	0.614	0.532	0.0015712	3.22002e-06	1.12236e-07	11
Ajuba	5.86324e-08	0.492463	0.5	0.425	0.00164159	0.717301	0.261932	0.317	0.376	1	0.717301	1.17265e-07	11
Ikbip	0.000877316	0.261117	0.305	0.239	1	6.62038e-08	0.379585	0.416	0.258	0.00185357	0.000877316	1.32408e-07	11
Calr	8.83864e-08	0.4482	0.969	0.975	0.00247464	1.47563e-07	0.332383	0.941	0.976	0.00413148	1.47563e-07	1.76773e-07	11
Limd2	9.20143e-08	0.337949	0.617	0.584	0.00257622	1.51435e-06	0.397052	0.614	0.618	0.0423987	1.51435e-06	1.84029e-07	11
Klhl13	9.25352e-08	0.389359	0.32	0.187	0.0025908	0.000100625	0.354161	0.287	0.181	1	0.000100625	1.8507e-07	11
Thra	9.86961e-08	0.332545	0.672	0.713	0.00276329	3.89961e-05	0.309378	0.653	0.645	1	3.89961e-05	1.97392e-07	11
Zbtb34	1.15984e-07	0.394282	0.445	0.344	0.00324731	8.70805e-06	0.399532	0.455	0.363	0.243808	8.70805e-06	2.31968e-07	11
Map2k1	1.19067e-07	0.467438	0.555	0.537	0.00333365	6.66384e-07	0.373027	0.604	0.537	0.0186574	6.66384e-07	2.38135e-07	11
Mid1ip1	2.64216e-07	0.364109	0.477	0.385	0.00739752	0.00103507	0.412368	0.455	0.42	1	0.00103507	5.28432e-07	11
Filip1l	2.70649e-07	0.451784	0.406	0.294	0.00757764	0.00237704	0.366092	0.366	0.299	1	0.00237704	5.41298e-07	11
Fam118a	0.000587483	0.3243	0.461	0.458	1	4.36979e-07	0.352833	0.564	0.472	0.0122345	0.000587483	8.73958e-07	11
Hnrnpdl	4.71504e-07	0.276734	0.766	0.783	0.0132012	0.000472328	0.325716	0.752	0.813	1	0.000472328	9.43007e-07	11
Serinc1	1.26878e-05	0.259477	0.734	0.804	0.355234	5.25511e-07	0.288029	0.812	0.828	0.0147133	1.26878e-05	1.05102e-06	11
Akap12	5.76415e-07	0.37055	0.648	0.692	0.0161385	2.62838e-06	0.442145	0.683	0.715	0.0735894	2.62838e-06	1.15283e-06	11
Metrn	5.8779e-07	0.273228	0.297	0.172	0.0164569	0.00228676	0.290846	0.257	0.182	1	0.00228676	1.17558e-06	11
Slc6a20a	6.02599e-07	0.462653	0.359	0.234	0.0168716	0.00039561	0.374673	0.317	0.212	1	0.00039561	1.2052e-06	11
Fam118b	6.48326e-07	0.49444	0.523	0.49	0.0181518	0.000829885	0.346772	0.505	0.481	1	0.000829885	1.29665e-06	11
Calu	0.00017578	0.368573	0.602	0.716	1	6.50381e-07	0.425103	0.703	0.768	0.0182094	0.00017578	1.30076e-06	11
Hcfc1r1	0.0102446	0.272189	0.656	0.795	1	7.00516e-07	0.329882	0.772	0.765	0.019613	0.0102446	1.40103e-06	11
Diaph2	0.0725969	0.28315	0.383	0.436	1	8.08701e-07	0.475752	0.525	0.437	0.022642	0.0725969	1.6174e-06	11
Gamt	8.31427e-07	0.399099	0.398	0.294	0.0232783	0.000224238	0.404275	0.347	0.255	1	0.000224238	1.66285e-06	11
Sarnp	7.09153e-05	0.275221	0.617	0.712	1	8.41617e-07	0.351403	0.743	0.751	0.0235636	7.09153e-05	1.68323e-06	11
Ace2	9.77101e-07	0.590558	0.312	0.187	0.0273569	0.000124893	0.271706	0.297	0.181	1	0.000124893	1.9542e-06	11
Hspb11	9.7997e-07	0.410741	0.453	0.39	0.0274372	0.0448725	0.337771	0.396	0.4	1	0.0448725	1.95994e-06	11
Gcnt2	1.02971e-05	0.384134	0.312	0.208	0.2883	1.07663e-06	0.335655	0.386	0.251	0.0301434	1.02971e-05	2.15325e-06	11
Mrc2	1.39889e-06	0.39608	0.266	0.148	0.039166	6.05612e-06	0.261482	0.287	0.155	0.169559	6.05612e-06	2.79777e-06	11
Tifa	1.58271e-06	0.44173	0.453	0.375	0.0443128	0.000194648	0.489048	0.455	0.406	1	0.000194648	3.16542e-06	11
Lamc3	1.60098e-06	0.36196	0.297	0.181	0.0448242	5.43723e-05	0.296053	0.267	0.15	1	5.43723e-05	3.20196e-06	11
Cuta	1.6541e-06	0.317465	0.781	0.827	0.0463116	0.0022812	0.323619	0.703	0.845	1	0.0022812	3.30821e-06	11
Ifi203	1.78813e-06	0.30152	0.227	0.114	0.0500642	0.00378665	0.374904	0.238	0.165	1	0.00378665	3.57627e-06	11
Prmt1	0.00133067	0.296123	0.641	0.759	1	1.93734e-06	0.346921	0.762	0.794	0.0542417	0.00133067	3.87468e-06	11
Sfxn1	0.000724988	0.344156	0.461	0.469	1	3.58541e-06	0.410845	0.584	0.511	0.100384	0.000724988	7.17081e-06	11
Gm13861	4.33272e-06	0.266402	0.258	0.146	0.121308	0.00216361	0.282342	0.228	0.149	1	0.00216361	8.66543e-06	11
Smc6	5.43688e-06	0.295402	0.633	0.673	0.152222	0.0766019	0.329434	0.564	0.717	1	0.0766019	1.08737e-05	11
Wbp5	2.01071e-05	0.366113	0.852	0.923	0.56296	6.07782e-06	0.376981	0.851	0.928	0.170167	2.01071e-05	1.21556e-05	11
Farp1	0.00100236	0.390127	0.383	0.357	1	6.18493e-06	0.371889	0.465	0.384	0.173166	0.00100236	1.23698e-05	11
Car2	0.720934	0.395691	0.453	0.653	1	7.33451e-06	0.980109	0.584	0.571	0.205352	0.720934	1.4669e-05	11
Mboat2	8.47405e-06	0.306891	0.289	0.18	0.237256	8.61209e-06	0.330594	0.307	0.183	0.241121	8.61209e-06	1.6948e-05	11
Stc1	8.98151e-06	0.343766	0.305	0.196	0.251464	0.887767	0.270928	0.238	0.291	1	0.887767	1.79629e-05	11
Fus	9.14977e-06	0.309117	0.914	0.946	0.256175	0.000421888	0.273646	0.861	0.945	1	0.000421888	1.82995e-05	11
Slc9a9	0.000575458	0.265833	0.266	0.188	1	9.4133e-06	0.380839	0.356	0.232	0.263554	0.000575458	1.88265e-05	11
Cp	2.17443e-05	0.368571	0.273	0.172	0.608798	9.58118e-06	0.322255	0.257	0.127	0.268254	2.17443e-05	1.91623e-05	11
Etfa	1.01636e-05	0.368851	0.547	0.547	0.284559	1.67347e-05	0.403449	0.584	0.552	0.468538	1.67347e-05	2.0327e-05	11
Fbln1	0.0639039	0.363341	0.289	0.28	1	1.10129e-05	0.437576	0.386	0.264	0.308339	0.0639039	2.20256e-05	11
Ndufb10	8.77059e-05	0.265158	0.852	0.916	1	1.14467e-05	0.295836	0.881	0.917	0.320484	8.77059e-05	2.28932e-05	11
Fundc2	1.17638e-05	0.310358	0.695	0.777	0.329362	0.000309213	0.26825	0.782	0.806	1	0.000309213	2.35274e-05	11
Mxra8	2.82832e-05	0.388984	0.531	0.558	0.791873	1.24837e-05	0.356009	0.574	0.553	0.349518	2.82832e-05	2.49672e-05	11
Pdzd2	1.38278e-05	0.509337	0.648	0.732	0.387152	0.00154992	0.297156	0.752	0.802	1	0.00154992	2.76555e-05	11
Papss1	0.0453891	0.314596	0.43	0.488	1	1.40402e-05	0.345147	0.535	0.47	0.393098	0.0453891	2.80802e-05	11
Pdia4	5.61534e-05	0.323572	0.547	0.581	1	1.41831e-05	0.35332	0.584	0.554	0.397099	5.61534e-05	2.83661e-05	11
Desi2	1.4959e-05	0.254862	0.633	0.701	0.418822	0.0133263	0.297501	0.614	0.715	1	0.0133263	2.99178e-05	11
Igsf8	1.6969e-05	0.453618	0.367	0.285	0.475097	0.25952	0.26673	0.287	0.3	1	0.25952	3.39376e-05	11
Fam162a	0.0103923	0.350758	0.523	0.656	1	1.8564e-05	0.356926	0.663	0.698	0.519754	0.0103923	3.71276e-05	11
Tnks1bp1	2.18211e-05	0.346889	0.461	0.428	0.610948	0.0858346	0.310519	0.406	0.438	1	0.0858346	4.36418e-05	11
Prkcsh	2.67638e-05	0.258085	0.609	0.636	0.749332	4.7274e-05	0.297641	0.634	0.657	1	4.7274e-05	5.35268e-05	11
Acaa2	3.30401e-05	0.402927	0.609	0.689	0.925058	0.000781602	0.320863	0.574	0.609	1	0.000781602	6.60792e-05	11
Rbmx	4.01506e-05	0.318038	0.438	0.39	1	0.00895673	0.328674	0.416	0.382	1	0.00895673	8.02995e-05	11
Cbx5	4.13891e-05	0.265865	0.562	0.581	1	0.00323691	0.268669	0.574	0.616	1	0.00323691	8.27766e-05	11
Cct8	4.28903e-05	0.371096	0.68	0.802	1	0.00184726	0.261997	0.703	0.813	1	0.00184726	8.57788e-05	11
Slc1a3	0.0233957	0.275271	0.156	0.109	1	4.36979e-05	0.332114	0.178	0.078	1	0.0233957	8.73939e-05	11
Chchd10	0.846261	0.348601	0.133	0.159	1	7.59211e-05	0.369716	0.287	0.175	1	0.846261	0.000151836	11
Ctxn1	7.69994e-05	0.262054	0.312	0.222	1	0.00145221	0.387327	0.366	0.298	1	0.00145221	0.000153993	11
Ldhb	8.05614e-05	0.34648	0.547	0.55	1	0.106632	0.296314	0.436	0.491	1	0.106632	0.000161116	11
Diablo	0.000273291	0.393288	0.469	0.493	1	8.25895e-05	0.415166	0.535	0.496	1	0.000273291	0.000165172	11
Mndal	0.000106095	0.311431	0.258	0.165	1	0.0841946	0.266198	0.238	0.209	1	0.0841946	0.000212179	11
Ddit4l	0.000362139	0.610607	0.391	0.349	1	0.000112475	0.629932	0.416	0.342	1	0.000362139	0.000224937	11
Plin2	0.00270059	0.447622	0.586	0.724	1	0.000126891	0.33365	0.673	0.732	1	0.00270059	0.000253766	11
Eif4e3	0.00195825	0.31751	0.344	0.302	1	0.000145037	0.348182	0.376	0.284	1	0.00195825	0.000290054	11
Plxnb2	0.000159016	0.286276	0.336	0.257	1	0.00130782	0.252728	0.356	0.28	1	0.00130782	0.000318007	11
Plcl1	0.000159668	0.329613	0.352	0.277	1	0.686684	0.253607	0.228	0.25	1	0.686684	0.000319311	11
Slbp	0.0377027	0.319224	0.516	0.621	1	0.000171996	0.279822	0.614	0.616	1	0.0377027	0.000343962	11
Asap2	0.000174333	0.409159	0.414	0.383	1	0.912428	0.291316	0.366	0.478	1	0.912428	0.000348635	11
Cobll1	0.000175013	0.37223	0.461	0.455	1	0.0537955	0.288204	0.406	0.455	1	0.0537955	0.000349994	11
Adamts4	0.00105569	0.252871	0.258	0.185	1	0.000178839	0.290561	0.386	0.295	1	0.00105569	0.000357646	11
Cers4	0.000190829	0.258394	0.516	0.531	1	0.000827901	0.321111	0.584	0.582	1	0.000827901	0.000381622	11
Jam3	0.000208347	0.261472	0.359	0.288	1	0.00455919	0.262779	0.347	0.272	1	0.00455919	0.00041665	11
Stk39	0.000209786	0.31467	0.375	0.311	1	0.410409	0.342064	0.317	0.358	1	0.410409	0.000419528	11
Plin3	0.000245624	0.285718	0.492	0.5	1	0.103058	0.258385	0.455	0.531	1	0.103058	0.000491187	11
Slc12a2	0.000263447	0.41911	0.477	0.48	1	0.000592822	0.406364	0.594	0.587	1	0.000592822	0.000526824	11
S100a10	0.000264999	0.485651	0.203	0.118	1	0.853421	0.828799	0.327	0.393	1	0.853421	0.000529928	11
Rbms3	0.00826564	0.307987	0.391	0.393	1	0.000337072	0.296501	0.455	0.4	1	0.00826564	0.000674031	11
Vkorc1	0.000358595	0.393722	0.469	0.486	1	0.195482	0.266906	0.426	0.505	1	0.195482	0.000717061	11
Ttc33	0.000367232	0.29682	0.422	0.396	1	0.0577875	0.271239	0.376	0.389	1	0.0577875	0.000734329	11
Spats2l	0.0130598	0.268107	0.273	0.236	1	0.000471535	0.345645	0.347	0.248	1	0.0130598	0.000942847	11
Tns3	0.000518357	0.311064	0.391	0.352	1	0.0211797	0.265083	0.376	0.344	1	0.0211797	0.00103645	11
Mgp	0.0189434	0.512967	0.211	0.155	1	0.000519914	0.889225	0.228	0.125	1	0.0189434	0.00103956	11
Tiparp	0.000653697	0.337311	0.406	0.379	1	0.000579584	0.405943	0.416	0.35	1	0.000653697	0.00115883	11
Igf2	0.00305302	0.413734	0.414	0.375	1	0.000585034	0.599327	0.406	0.332	1	0.00305302	0.00116973	11
Rps6ka4	0.00106696	0.28496	0.328	0.273	1	0.000605317	0.277457	0.366	0.281	1	0.00106696	0.00121027	11
Tmed3	0.176561	0.25318	0.469	0.612	1	0.000689469	0.327587	0.624	0.652	1	0.176561	0.00137846	11
Atxn10	0.000707801	0.252608	0.539	0.59	1	0.00113451	0.339942	0.535	0.606	1	0.00113451	0.0014151	11
Tns1	0.110404	0.272504	0.586	0.736	1	0.000719679	0.378995	0.683	0.731	1	0.110404	0.00143884	11
Rnase4	0.000794702	0.309475	0.359	0.299	1	0.0116197	0.393043	0.426	0.406	1	0.0116197	0.00158877	11
Cdk6	0.000916688	0.428409	0.414	0.4	1	0.00388201	0.394104	0.426	0.401	1	0.00388201	0.00183254	11
Col18a1	0.00155756	0.341709	0.375	0.311	1	0.0636563	0.552769	0.356	0.359	1	0.0636563	0.00311269	11
Sdf2l1	0.0427597	0.265135	0.352	0.364	1	0.00160538	0.377982	0.426	0.377	1	0.0427597	0.00320819	11
Armcx6	0.00233885	0.280196	0.258	0.195	1	0.00294169	0.260448	0.277	0.198	1	0.00294169	0.00467223	11
Nek6	0.620587	0.251336	0.359	0.471	1	0.00277425	0.394789	0.475	0.463	1	0.620587	0.00554081	11
Fdx1	0.458932	0.250449	0.32	0.391	1	0.00303682	0.310262	0.465	0.437	1	0.458932	0.00606442	11
Cystm1	0.00413732	0.251431	0.32	0.28	1	0.00310302	0.320722	0.366	0.308	1	0.00413732	0.00619641	11
Rab31	0.00333892	0.313317	0.375	0.364	1	0.00671649	0.279645	0.436	0.398	1	0.00671649	0.0066667	11
Ptp4a3	0.00401781	0.554181	0.812	0.935	1	0.5037	0.385836	0.871	0.941	1	0.5037	0.00801948	11
Rab34	0.00412027	0.268547	0.297	0.248	1	0.0799926	0.256263	0.287	0.26	1	0.0799926	0.00822356	11
Dpysl2	0.00538849	0.31996	0.656	0.815	1	0.0071484	0.303568	0.723	0.853	1	0.0071484	0.0107479	11
Eef2k	0.0483132	0.277786	0.242	0.216	1	0.0115251	0.315929	0.267	0.212	1	0.0483132	0.0229173	11
P3h4	0.116002	0.251188	0.297	0.305	1	0.0175492	0.287436	0.327	0.291	1	0.116002	0.0347903	11
Cd74	0	2.54567	0.822	0.006	0	0	2.25441	0.834	0.01	0	0	0	12
Cd52	0	1.38266	0.933	0.005	0	0	1.10078	0.914	0.014	0	0	0	12
Cd79b	0	1.22795	0.778	0.007	0	0	0.908713	0.766	0.013	0	0	0	12
Cd79a	0	1.15465	0.689	0.005	0	0	1.05401	0.857	0.009	0	0	0	12
H2-Aa	0	1.13086	0.778	0	0	0	0.757234	0.6	0.002	0	0	0	12
Rac2	0	1.07689	0.911	0.005	0	0	0.886904	0.926	0.019	0	0	0	12
Ly6d	0	1.01611	0.733	0	0	0	1.07135	0.817	0.001	0	0	0	12
Plac8	0	0.956345	0.556	0.008	0	0	1.2453	0.771	0.017	0	0	0	12
Ms4a1	0	0.828599	0.622	0	0	0	0.646163	0.629	0	0	0	0	12
Ptprcap	0	0.751665	0.867	0.018	0	0	0.533476	0.76	0.027	0	0	0	12
Ltb	0	0.748194	0.756	0.011	0	0	0.447316	0.651	0.018	0	0	0	12
Cd37	0	0.710641	0.778	0.006	0	0	0.469667	0.651	0.014	0	0	0	12
Ccr7	0	0.599711	0.622	0.001	0	0	0.417018	0.583	0.002	0	0	0	12
Mzb1	0	0.556379	0.6	0	0	0	0.519725	0.549	0.001	0	0	0	12
Fcrla	0	0.395255	0.444	0	0	0	0.320231	0.486	0	0	0	0	12
Ptprc	0	0.371008	0.667	0.004	0	0	0.290117	0.457	0.009	0	0	0	12
Ctss	0	0.362036	0.556	0.005	0	0	0.260019	0.451	0.009	0	0	0	12
Cd53	0	0.320475	0.622	0.004	0	0	0.310428	0.451	0.007	0	0	0	12
Lsp1	5.769e-277	0.658807	0.556	0.009	1.6152e-272	0	0.587288	0.646	0.012	0	5.769e-277	0	12
Ifi27l2a	2.51474e-207	0.360179	0.467	0.009	7.04077e-203	0	0.451461	0.594	0.025	0	2.51474e-207	0	12
Napsa	2.54456e-149	0.455618	0.467	0.013	7.12427e-145	0	0.457333	0.543	0.02	0	2.54456e-149	0	12
Coro1a	3.08951e-147	0.903664	0.689	0.029	8.65002e-143	0	0.860086	0.834	0.056	0	3.08951e-147	0	12
H2-Eb1	2.58946e-117	0.574327	0.6	0.028	7.24997e-113	0	0.566133	0.583	0.028	0	2.58946e-117	0	12
H2-Ab1	1.77471e-278	0.687384	0.667	0.014	4.96884e-274	5.688e-240	0.650769	0.491	0.032	1.59253e-235	5.688e-240	3.54942e-278	12
Ms4a4b	5.40888e-245	0.430149	0.178	0.001	1.51438e-240	1.26382e-149	0.304563	0.131	0.003	3.53843e-145	1.26382e-149	1.08178e-244	12
Cd2	3.62236e-69	0.286212	0.333	0.014	1.01419e-64	7.82738e-228	0.307415	0.474	0.03	2.19151e-223	3.62236e-69	1.56548e-227	12
Ifi30	6.45711e-10	0.327789	0.311	0.076	1.80786e-05	3.42215e-95	0.291979	0.549	0.091	9.58133e-91	6.45711e-10	6.8443e-95	12
Stk17b	2.24205e-25	0.374142	0.667	0.144	6.27729e-21	5.92578e-73	0.365724	0.651	0.164	1.6591e-68	2.24205e-25	1.18516e-72	12
Gmfg	1.66584e-16	0.449155	0.889	0.374	4.66402e-12	4.07412e-32	0.353565	0.84	0.421	1.14067e-27	1.66584e-16	8.14824e-32	12
Crip1	2.87783e-11	0.644892	0.911	0.513	8.05736e-07	1.80168e-30	0.503742	0.949	0.615	5.04433e-26	2.87783e-11	3.60335e-30	12
Ptpn18	2.66466e-12	0.430131	0.889	0.526	7.46053e-08	6.5007e-25	0.320138	0.823	0.478	1.82007e-20	2.66466e-12	1.30014e-24	12
Alas2	0.0177927	0.366841	0.289	0.167	1	1.51336e-24	0.51897	0.383	0.122	4.23709e-20	0.0177927	3.02671e-24	12
Pim1	4.75601e-05	0.250031	0.8	0.58	1	2.75157e-24	0.349685	0.84	0.507	7.70385e-20	4.75601e-05	5.50315e-24	12
Limd2	3.54381e-10	0.506182	0.933	0.583	9.92197e-06	1.46847e-20	0.300395	0.874	0.615	4.11143e-16	3.54381e-10	2.93695e-20	12
Hba-a2	0.154136	0.456723	0.533	0.466	1	9.46231e-18	0.802329	0.686	0.411	2.64926e-13	0.154136	1.89246e-17	12
Hba-a1	0.0729547	0.511935	0.644	0.529	1	5.44408e-17	0.735137	0.743	0.488	1.52423e-12	0.0729547	1.08882e-16	12
Ccnd2	2.86052e-05	0.354717	0.689	0.483	0.800889	6.8475e-17	0.286333	0.909	0.629	1.91716e-12	2.86052e-05	1.3695e-16	12
S100a6	0.00793913	0.349034	0.178	0.08	1	1.67632e-16	0.43227	0.549	0.28	4.69335e-12	0.00793913	3.35263e-16	12
Hbb-bs	0.0220457	0.644712	0.911	0.769	1	2.14586e-14	0.918328	0.88	0.737	6.00798e-10	0.0220457	4.29172e-14	12
Hbb-bt	0.000816726	0.328863	0.622	0.372	1	3.48128e-12	0.856774	0.537	0.322	9.7469e-08	0.000816726	6.96257e-12	12
Ttr	5.18793e-130	1.81299	1	0.148	1.45252e-125	2.31872e-138	2.17383	1	0.263	6.49195e-134	5.18793e-130	4.63744e-138	13
mt-Atp6	2.95993e-34	0.337979	1	1	8.28722e-30	2.23216e-54	0.360255	1	1	6.24961e-50	2.95993e-34	4.46433e-54	13
Snhg9	2.44885e-42	0.933624	0.833	0.33	6.85628e-38	1.68663e-48	0.922154	0.783	0.407	4.72222e-44	2.44885e-42	3.37325e-48	13
Egfl7	3.79798e-22	0.41828	1	0.987	1.06336e-17	2.73919e-36	0.460969	1	0.983	7.66918e-32	3.79798e-22	5.47838e-36	13
Junb	5.98912e-29	0.61792	1	0.964	1.67683e-24	2.99194e-26	0.444054	1	0.97	8.37684e-22	2.99194e-26	1.19782e-28	13
Tfrc	2.06318e-28	0.648131	1	0.936	5.77649e-24	6.19137e-24	0.473871	0.992	0.898	1.73346e-19	6.19137e-24	4.12636e-28	13
Ddx17	5.42481e-15	0.538398	0.833	0.731	1.51884e-10	2.56699e-23	0.589202	0.814	0.762	7.18705e-19	5.42481e-15	5.13397e-23	13
Fos	2.51898e-22	0.574479	1	0.881	7.05263e-18	3.05086e-18	0.362803	1	0.893	8.54179e-14	3.05086e-18	5.03795e-22	13
Atf3	1.65583e-16	0.475191	0.872	0.611	4.63599e-12	5.91319e-22	0.480896	0.899	0.735	1.65558e-17	1.65583e-16	1.18264e-21	13
AY036118	7.5649e-22	0.767488	0.769	0.505	2.11802e-17	2.2306e-20	0.588565	0.667	0.484	6.24524e-16	2.2306e-20	1.51298e-21	13
Tuba1a	2.20116e-10	0.267707	1	0.994	6.16282e-06	1.4795e-21	0.275619	1	0.991	4.1423e-17	2.20116e-10	2.959e-21	13
Ddx5	4.35361e-21	0.499444	0.987	0.987	1.21892e-16	5.68243e-20	0.382711	0.992	0.99	1.59097e-15	5.68243e-20	8.70722e-21	13
Nr4a1	6.9308e-21	0.589837	0.949	0.763	1.94049e-16	5.59156e-19	0.467587	0.938	0.806	1.56553e-14	5.59156e-19	1.38616e-20	13
Eif4a2	7.96669e-21	0.555758	0.962	0.865	2.23051e-16	5.06345e-20	0.445721	0.853	0.84	1.41766e-15	5.06345e-20	1.59334e-20	13
Wsb1	8.22633e-21	0.667694	0.846	0.639	2.30321e-16	1.28534e-17	0.531808	0.713	0.658	3.5987e-13	1.28534e-17	1.64527e-20	13
Hspa1a	6.86698e-10	0.312112	0.564	0.303	1.92262e-05	1.03501e-20	0.421655	0.752	0.454	2.89782e-16	6.86698e-10	2.07002e-20	13
Rap1b	0.000355719	0.250461	0.91	0.942	1	1.47747e-20	0.439662	0.969	0.955	4.13662e-16	0.000355719	2.95494e-20	13
Ywhah	6.71046e-11	0.33513	0.974	0.944	1.87879e-06	1.66446e-19	0.381349	0.977	0.97	4.66016e-15	6.71046e-11	3.32892e-19	13
Hnrnph1	9.05702e-14	0.597371	0.782	0.684	2.53578e-09	2.2528e-18	0.506885	0.767	0.742	6.30738e-14	9.05702e-14	4.50559e-18	13
Egr1	9.16049e-17	0.559246	0.974	0.727	2.56475e-12	1.52642e-09	0.280706	0.922	0.785	4.27366e-05	1.52642e-09	1.8321e-16	13
Hnrnpf	4.03381e-11	0.309448	1	0.987	1.12939e-06	1.77216e-16	0.281238	0.992	0.989	4.9617e-12	4.03381e-11	3.54432e-16	13
Icam1	0.000381573	0.25746	0.474	0.371	1	3.47349e-16	0.365156	0.752	0.537	9.72507e-12	0.000381573	6.94698e-16	13
Srsf2	2.41338e-11	0.39658	0.962	0.942	6.75697e-07	4.45967e-16	0.357953	0.93	0.942	1.24862e-11	2.41338e-11	8.91934e-16	13
Cks2	1.35545e-11	0.387282	0.718	0.442	3.79498e-07	5.0107e-16	0.322117	0.767	0.563	1.4029e-11	1.35545e-11	1.00214e-15	13
Zfp36	9.47042e-10	0.40608	0.846	0.709	2.65153e-05	8.51828e-16	0.378685	0.915	0.782	2.38495e-11	9.47042e-10	1.70366e-15	13
Ubc	1.51935e-15	0.360453	1	0.993	4.25388e-11	1.13806e-15	0.310837	1	0.989	3.18635e-11	1.51935e-15	2.27613e-15	13
Sema6d	5.30948e-14	0.424718	0.936	0.831	1.48655e-09	1.23201e-15	0.42297	0.876	0.815	3.44937e-11	5.30948e-14	2.46401e-15	13
Apoe	1.22694e-08	0.276593	0.808	0.635	0.000343519	1.6673e-15	0.2622	0.705	0.49	4.66811e-11	1.22694e-08	3.3346e-15	13
Tie1	2.43784e-07	0.317175	0.91	0.89	0.00682546	5.30337e-15	0.390015	0.93	0.889	1.48484e-10	2.43784e-07	1.06067e-14	13
Nrep	7.70663e-15	0.418983	0.974	0.927	2.1577e-10	9.74008e-12	0.333515	0.922	0.906	2.72703e-07	9.74008e-12	1.54133e-14	13
Odc1	5.63932e-09	0.284999	0.962	0.784	0.00015789	9.22221e-15	0.290481	0.992	0.878	2.58204e-10	5.63932e-09	1.84444e-14	13
Ier3	1.23817e-10	0.359868	0.859	0.688	3.46663e-06	1.24323e-14	0.339745	0.884	0.775	3.48079e-10	1.23817e-10	2.48646e-14	13
Eif4g2	1.17034e-09	0.303148	1	0.982	3.27671e-05	1.58327e-14	0.329501	1	0.982	4.43283e-10	1.17034e-09	3.16653e-14	13
Plat	3.86732e-07	0.287	0.885	0.844	0.0108277	2.29116e-14	0.367532	0.938	0.867	6.41479e-10	3.86732e-07	4.58232e-14	13
H2-D1	3.94232e-06	0.256508	0.949	0.903	0.110377	4.39492e-14	0.320669	0.969	0.953	1.23049e-09	3.94232e-06	8.78985e-14	13
Nampt	5.82576e-14	0.456035	0.897	0.888	1.6311e-09	2.53415e-06	0.314141	0.713	0.762	0.0709511	2.53415e-06	1.16515e-13	13
Ckb	1.05197e-13	0.487329	0.756	0.553	2.9453e-09	4.31722e-12	0.437222	0.698	0.657	1.20874e-07	4.31722e-12	2.10393e-13	13
Hnrnpa2b1	9.83002e-12	0.372857	0.987	0.976	2.75221e-07	1.23318e-13	0.314152	0.977	0.978	3.45266e-09	9.83002e-12	2.46636e-13	13
Dusp1	2.01242e-13	0.336331	1	0.931	5.63437e-09	1.34353e-13	0.276566	0.984	0.958	3.76161e-09	2.01242e-13	2.68706e-13	13
Fn1	7.53951e-08	0.255263	1	0.951	0.00211091	1.78444e-13	0.328766	1	0.948	4.99608e-09	7.53951e-08	3.56888e-13	13
Ifitm2	8.94193e-06	0.308131	0.808	0.771	0.250356	2.02988e-13	0.320693	0.938	0.884	5.68326e-09	8.94193e-06	4.05976e-13	13
Cnbp	2.38347e-10	0.321562	0.962	0.964	6.67324e-06	1.26454e-12	0.321937	0.961	0.965	3.54046e-08	2.38347e-10	2.52908e-12	13
Aldoa	1.8997e-08	0.269942	1	0.963	0.000531877	1.31162e-12	0.251277	0.984	0.98	3.67229e-08	1.8997e-08	2.62325e-12	13
Adamts1	2.68836e-07	0.294955	0.795	0.668	0.00752686	1.59933e-12	0.387297	0.884	0.792	4.47781e-08	2.68836e-07	3.19866e-12	13
Rsrp1	1.60741e-12	0.444778	0.962	0.914	4.50041e-08	4.63637e-09	0.310957	0.86	0.91	0.000129809	4.63637e-09	3.21481e-12	13
Kcp	2.69736e-12	0.511584	0.654	0.459	7.55207e-08	1.10095e-06	0.365271	0.473	0.415	0.0308243	1.10095e-06	5.39472e-12	13
Cav1	3.13312e-08	0.32118	0.808	0.757	0.000877211	9.60528e-12	0.343502	0.853	0.823	2.68929e-07	3.13312e-08	1.92106e-11	13
Bhlhe40	0.00161402	0.258453	0.615	0.622	1	1.66311e-10	0.351037	0.76	0.742	4.65636e-06	0.00161402	3.32621e-10	13
Sptan1	2.31907e-10	0.373589	0.923	0.896	6.49294e-06	1.03971e-06	0.255298	0.845	0.886	0.0291098	1.03971e-06	4.63814e-10	13
Agrn	3.16956e-09	0.459168	0.821	0.795	8.87414e-05	1.15455e-09	0.357103	0.798	0.799	3.2325e-05	3.16956e-09	2.30909e-09	13
Atp13a5	1.27982e-09	0.43672	0.744	0.506	3.58324e-05	4.04717e-09	0.327955	0.698	0.572	0.000113313	4.04717e-09	2.55964e-09	13
Sqstm1	2.74613e-05	0.355672	0.705	0.779	0.768863	1.54218e-09	0.285827	0.798	0.83	4.31781e-05	2.74613e-05	3.08437e-09	13
Pdia3	4.64784e-08	0.289995	0.949	0.937	0.0013013	2.39552e-09	0.27564	0.915	0.941	6.70699e-05	4.64784e-08	4.79105e-09	13
Hnrnpdl	0.000221637	0.297132	0.744	0.783	1	2.69887e-09	0.315433	0.76	0.813	7.55631e-05	0.000221637	5.39775e-09	13
Gm26532	1.61673e-07	0.329754	0.615	0.44	0.00452652	5.40946e-09	0.407671	0.659	0.601	0.000151454	1.61673e-07	1.08189e-08	13
Slc22a17	2.75554e-06	0.311902	0.282	0.134	0.0771496	7.24311e-09	0.330362	0.271	0.13	0.000202793	2.75554e-06	1.44862e-08	13
Pnrc1	3.51652e-08	0.294696	0.923	0.903	0.000984554	9.32214e-09	0.258612	0.876	0.897	0.000261001	3.51652e-08	1.86443e-08	13
Gt(ROSA)26Sor	0.000346114	0.289064	0.538	0.518	1	1.17631e-08	0.343379	0.597	0.582	0.000329344	0.000346114	2.35263e-08	13
Leng8	8.53598e-06	0.357692	0.5	0.397	0.23899	1.77134e-08	0.445586	0.504	0.44	0.000495941	8.53598e-06	3.54269e-08	13
Klc1	2.70001e-08	0.379373	0.744	0.695	0.000755948	2.52951e-06	0.282594	0.651	0.754	0.0708213	2.52951e-06	5.40002e-08	13
Rab5a	0.004776	0.250154	0.679	0.774	1	2.84951e-08	0.289979	0.721	0.786	0.000797805	0.004776	5.69902e-08	13
Rcn2	7.85677e-08	0.353964	0.667	0.595	0.00219974	1.64523e-05	0.306209	0.574	0.62	0.460633	1.64523e-05	1.57135e-07	13
Ssr3	8.36665e-08	0.331323	0.859	0.86	0.00234249	9.18088e-06	0.291333	0.791	0.872	0.257046	9.18088e-06	1.67333e-07	13
Canx	6.50325e-07	0.338969	0.897	0.898	0.0182078	8.72534e-08	0.267184	0.868	0.918	0.00244292	6.50325e-07	1.74507e-07	13
Mcf2l	0.000117286	0.272879	0.731	0.759	1	1.14455e-07	0.308943	0.698	0.723	0.0032045	0.000117286	2.28909e-07	13
Srsf5	1.90989e-07	0.2846	0.923	0.912	0.00534732	1.22104e-06	0.295426	0.837	0.904	0.0341867	1.22104e-06	3.81979e-07	13
Zfand5	7.23118e-06	0.297005	0.833	0.804	0.202459	2.04024e-07	0.272156	0.767	0.85	0.00571227	7.23118e-06	4.08049e-07	13
Ube2e3	5.95115e-05	0.270477	0.808	0.861	1	3.11309e-07	0.341642	0.76	0.859	0.00871602	5.95115e-05	6.22617e-07	13
Serinc1	2.0852e-05	0.269326	0.808	0.803	0.583815	3.16963e-07	0.310845	0.729	0.829	0.00887433	2.0852e-05	6.33926e-07	13
Ypel3	0.000412808	0.260415	0.782	0.813	1	4.23876e-07	0.266268	0.736	0.774	0.0118677	0.000412808	8.47752e-07	13
Ccnl2	8.66706e-07	0.339731	0.731	0.747	0.024266	3.42682e-05	0.268208	0.659	0.77	0.959442	3.42682e-05	1.73341e-06	13
Sorbs3	0.00425932	0.306937	0.462	0.449	1	1.14034e-06	0.368142	0.519	0.503	0.0319271	0.00425932	2.28067e-06	13
Picalm	1.53902e-06	0.314731	0.731	0.684	0.0430895	5.3394e-06	0.278989	0.674	0.744	0.149493	5.3394e-06	3.07804e-06	13
Map4k2	1.78346e-06	0.379675	0.692	0.725	0.0499334	0.000244994	0.274573	0.628	0.729	1	0.000244994	3.56692e-06	13
Pxdn	2.28889e-06	0.332963	0.59	0.488	0.0640843	0.000178752	0.275436	0.558	0.593	1	0.000178752	4.57777e-06	13
Eogt	3.57509e-06	0.276158	0.808	0.802	0.100095	4.4386e-06	0.306789	0.721	0.78	0.124272	4.4386e-06	7.15017e-06	13
Tspan3	2.77022e-05	0.268659	0.821	0.837	0.775605	6.18653e-06	0.316335	0.713	0.819	0.17321	2.77022e-05	1.2373e-05	13
Eny2	6.26298e-06	0.253572	0.782	0.822	0.175351	9.53027e-06	0.250126	0.767	0.846	0.266828	9.53027e-06	1.25259e-05	13
Stx1a	0.00228204	0.309769	0.487	0.477	1	1.63845e-05	0.388644	0.457	0.429	0.458732	0.00228204	3.27687e-05	13
Dtx3	0.00381542	0.293842	0.538	0.525	1	1.71863e-05	0.312861	0.543	0.548	0.481183	0.00381542	3.43723e-05	13
Gm26917	0.000118912	0.309225	0.423	0.316	1	2.27572e-05	0.37775	0.426	0.373	0.637157	0.000118912	4.5514e-05	13
Arap3	0.000278255	0.298648	0.641	0.689	1	0.000184443	0.337472	0.597	0.727	1	0.000278255	0.000368852	13
Nsmf	0.000410525	0.273142	0.538	0.507	1	0.000626546	0.295186	0.45	0.465	1	0.000626546	0.000820882	13
Ivns1abp	0.000694966	0.254489	0.603	0.606	1	0.0339618	0.282721	0.434	0.512	1	0.0339618	0.00138945	13
Efr3b	0.000822018	0.276778	0.474	0.416	1	0.0180922	0.258353	0.388	0.405	1	0.0180922	0.00164336	13
S100a8	0	1.9073	0.346	0.002	0	4.99625e-279	1.78226	0.273	0.006	1.39885e-274	4.99625e-279	0	14
Lyz2	0	1.86997	0.904	0.008	0	0	1.96559	0.899	0.011	0	0	0	14
Tyrobp	0	1.39726	1	0.004	0	0	1.43833	0.993	0.009	0	0	0	14
Fcer1g	0	1.35009	1	0.01	0	0	1.24432	0.986	0.017	0	0	0	14
Plac8	0	1.23267	0.654	0.007	0	0	1.30721	0.77	0.019	0	0	0	14
Cd52	0	0.776485	0.846	0.005	0	0	0.721794	0.842	0.016	0	0	0	14
Il1b	0	0.732815	0.538	0.002	0	0	0.305028	0.446	0.002	0	0	0	14
Ctss	0	0.681274	0.635	0.004	0	0	0.540531	0.727	0.008	0	0	0	14
Thbs1	0	0.620887	0.538	0.007	0	6.86785e-307	0.359668	0.345	0.009	1.92286e-302	6.86785e-307	0	14
Alox5ap	0	0.603552	0.769	0.013	0	0	0.596621	0.827	0.038	0	0	0	14
Ccl6	0	0.534232	0.577	0.002	0	0	0.37376	0.662	0.002	0	0	0	14
Rac2	0	0.392638	0.615	0.006	0	5.2229e-262	0.383523	0.518	0.024	1.46231e-257	5.2229e-262	0	14
Ptprc	0	0.378671	0.558	0.004	0	0	0.276632	0.403	0.011	0	0	0	14
Slpi	0	0.369966	0.346	0.001	0	1.67842e-109	0.264569	0.115	0.003	4.69925e-105	1.67842e-109	0	14
Lsp1	0	0.36493	0.615	0.009	0	0	0.477391	0.604	0.014	0	0	0	14
Spi1	0	0.2924	0.673	0.003	0	0	0.332848	0.612	0.006	0	0	0	14
Lgals3	1.92372e-163	0.79703	0.788	0.039	5.38604e-159	0	0.505692	0.777	0.044	0	1.92372e-163	0	14
Cx3cr1	4.19906e-105	0.356673	0.25	0.006	1.17565e-100	1.9076e-276	0.281566	0.36	0.011	5.34091e-272	4.19906e-105	3.81521e-276	14
Coro1a	2.75335e-242	0.675632	0.827	0.028	7.70883e-238	1.14201e-259	0.642711	0.763	0.058	3.19739e-255	2.75335e-242	2.28401e-259	14
Ifi27l2a	7.9266e-196	0.409102	0.423	0.009	2.21929e-191	6.4883e-248	0.504651	0.518	0.027	1.81659e-243	7.9266e-196	1.29766e-247	14
Lst1	3.52455e-92	0.596265	0.769	0.069	9.86803e-88	1.22371e-206	0.461547	0.755	0.072	3.42614e-202	3.52455e-92	2.44742e-206	14
Cd44	1.72358e-165	0.345047	0.712	0.031	4.82569e-161	1.25691e-172	0.259677	0.468	0.031	3.51911e-168	1.72358e-165	2.51383e-172	14
S100a9	1.21905e-105	1.70036	0.154	0.002	3.4131e-101	5.96044e-90	1.40025	0.129	0.004	1.6688e-85	5.96044e-90	2.4381e-105	14
Fyb	2.39565e-53	0.294111	0.442	0.036	6.70735e-49	1.97701e-102	0.280397	0.417	0.042	5.53525e-98	2.39565e-53	3.95403e-102	14
Cebpb	1.08235e-24	0.715484	0.923	0.402	3.03036e-20	1.94022e-60	0.834589	0.921	0.378	5.43223e-56	1.08235e-24	3.88044e-60	14
Laptm5	1.55639e-17	0.336508	0.654	0.191	4.35758e-13	7.27876e-38	0.282414	0.626	0.193	2.03791e-33	1.55639e-17	1.45575e-37	14
Msrb1	1.15999e-13	0.395096	0.962	0.536	3.24773e-09	4.15694e-24	0.350708	0.928	0.613	1.16386e-19	1.15999e-13	8.31388e-24	14
Gm2a	1.21135e-07	0.305276	0.75	0.392	0.00339152	6.93143e-19	0.259041	0.727	0.351	1.94066e-14	1.21135e-07	1.38629e-18	14
Car1	0	1.60708	0.917	0.002	0	0	1.63505	0.657	0.001	0	0	0	15
Aqp1	0	1.5203	1	0.004	0	0	1.18298	0.769	0.005	0	0	0	15
Ermap	0	1.03529	0.917	0.001	0	0	0.831935	0.686	0.002	0	0	0	15
Gm15915	0	0.901144	0.917	0.001	0	0	1.35247	0.663	0.001	0	0	0	15
Kcnn4	0	0.872074	0.667	0.002	0	0	0.712253	0.669	0.004	0	0	0	15
Spn	0	0.869957	1	0.001	0	0	0.539618	0.604	0.007	0	0	0	15
Gata1	0	0.859436	0.917	0	0	0	0.646237	0.651	0.002	0	0	0	15
Rhag	0	0.834087	0.917	0.001	0	0	0.608762	0.598	0.001	0	0	0	15
Pklr	0	0.734964	0.917	0	0	0	0.251467	0.426	0	0	0	0	15
Klf1	0	0.642447	0.833	0.002	0	0	1.25964	0.799	0.004	0	0	0	15
Rhd	0	0.624413	0.667	0.003	0	0	0.798635	0.444	0.003	0	0	0	15
Ikzf1	0	0.559627	0.75	0.002	0	0	0.574654	0.68	0.007	0	0	0	15
Sphk1	0	0.539637	0.833	0.003	0	0	0.304004	0.349	0.003	0	0	0	15
Ces2g	0	0.523687	0.833	0.002	0	0	0.442939	0.509	0.004	0	0	0	15
Smim5	0	0.498826	0.75	0	0	0	0.365068	0.444	0.002	0	0	0	15
Apbb1ip	0	0.446266	0.667	0.003	0	0	0.380912	0.444	0.01	0	0	0	15
Slc14a1	0	0.434478	0.333	0.001	0	0	0.311481	0.408	0.002	0	0	0	15
Cela1	0	0.399093	0.583	0.002	0	0	0.327899	0.462	0.002	0	0	0	15
Runx3	0	0.363586	0.5	0.001	0	0	0.342904	0.408	0.003	0	0	0	15
Gfi1b	0	0.297458	0.5	0	0	0	0.538696	0.503	0	0	0	0	15
Asb17os	0	0.288695	0.583	0	0	0	0.276115	0.355	0.001	0	0	0	15
Myb	1.86169e-227	0.428508	0.583	0.003	5.21235e-223	0	0.581661	0.503	0.005	0	1.86169e-227	0	15
Bex4	3.98239e-213	1.38291	1	0.012	1.11499e-208	0	1.23017	0.716	0.02	0	3.98239e-213	0	15
Fermt3	5.09176e-184	0.730234	0.917	0.011	1.42559e-179	0	0.688881	0.615	0.012	0	5.09176e-184	0	15
Tspan32	3.83561e-182	0.967812	0.917	0.011	1.07389e-177	0	0.780209	0.793	0.016	0	3.83561e-182	0	15
Bcl11a	9.12965e-165	0.728964	0.833	0.01	2.55612e-160	0	0.71512	0.728	0.019	0	9.12965e-165	0	15
Icam4	5.11466e-157	0.390555	0.5	0.004	1.432e-152	0	0.503429	0.503	0.009	0	5.11466e-157	0	15
Rgs18	1.09766e-154	0.293915	0.25	0.001	3.07322e-150	0	0.366721	0.32	0.002	0	1.09766e-154	0	15
Fam109b	6.15158e-132	0.394187	0.583	0.006	1.72232e-127	0	0.420499	0.491	0.008	0	6.15158e-132	0	15
Syngr1	3.03115e-129	0.556445	0.75	0.011	8.48661e-125	0	0.421907	0.503	0.014	0	3.03115e-129	0	15
Rac2	9.71214e-116	0.790515	0.583	0.007	2.71921e-111	0	0.85217	0.799	0.021	0	9.71214e-116	0	15
Cd48	1.32756e-107	0.726411	0.333	0.002	3.7169e-103	0	0.315117	0.355	0.006	0	1.32756e-107	0	15
Nfe2	1.17017e-104	0.645796	0.583	0.008	3.27625e-100	0	0.401885	0.538	0.019	0	1.17017e-104	0	15
Cited4	3.06988e-103	0.749509	0.917	0.021	8.59505e-99	0	0.827596	0.68	0.02	0	3.06988e-103	0	15
AI662270	9.55798e-92	1.31341	0.917	0.024	2.67604e-87	0	1.11943	0.852	0.04	0	9.55798e-92	0	15
Tspo2	1.17534e-89	0.712586	0.75	0.016	3.29073e-85	0	0.724999	0.74	0.012	0	1.17534e-89	0	15
Tuba4a	8.88106e-74	0.983651	0.917	0.03	2.48652e-69	0	1.19459	0.846	0.047	0	8.88106e-74	0	15
Dnph1	2.49001e-61	0.438736	0.667	0.019	6.97153e-57	0	0.316456	0.479	0.017	0	2.49001e-61	0	15
Mfsd2b	8.00807e-47	0.307585	0.417	0.01	2.2421e-42	0	0.302765	0.462	0.014	0	8.00807e-47	0	15
Col5a1	2.04317e-38	0.586259	0.667	0.03	5.72046e-34	0	0.418608	0.491	0.021	0	2.04317e-38	0	15
Add2	2.28719e-37	0.384797	0.5	0.017	6.40367e-33	0	0.586025	0.544	0.022	0	2.28719e-37	0	15
Prkar2b	2.85614e-13	0.71816	0.667	0.088	7.99662e-09	0	0.668544	0.775	0.057	0	2.85614e-13	0	15
Cd44	5.88901e-20	0.282279	0.5	0.033	1.64881e-15	2.02977e-297	0.426236	0.544	0.03	5.68296e-293	5.88901e-20	4.05955e-297	15
Mt2	4.62226e-60	1.89433	1	0.046	1.29414e-55	6.7139e-265	1.91004	0.734	0.068	1.87976e-260	4.62226e-60	1.34278e-264	15
Ptprcap	3.78432e-44	1.25296	0.583	0.02	1.05953e-39	9.67878e-243	0.660772	0.491	0.03	2.70986e-238	3.78432e-44	1.93576e-242	15
Mns1	1.17429e-17	0.512908	0.667	0.069	3.28779e-13	2.14865e-213	0.713847	0.675	0.068	6.01578e-209	1.17429e-17	4.29729e-213	15
Spint2	7.86628e-82	0.296315	0.5	0.008	2.2024e-77	1.02529e-207	0.317277	0.396	0.022	2.87062e-203	7.86628e-82	2.05059e-207	15
Syce2	3.19879e-24	0.851817	0.917	0.1	8.95598e-20	1.31395e-206	0.830804	0.846	0.122	3.6788e-202	3.19879e-24	2.6279e-206	15
Smim1	6.30106e-24	0.884882	0.917	0.103	1.76417e-19	9.57485e-205	1.06236	0.781	0.103	2.68077e-200	6.30106e-24	1.91497e-204	15
Ramp1	2.1226e-49	0.397411	0.5	0.013	5.94286e-45	1.66641e-204	0.370773	0.414	0.025	4.66562e-200	2.1226e-49	3.33283e-204	15
Samd14	7.84098e-21	0.492666	0.583	0.044	2.19532e-16	2.07658e-196	0.468443	0.651	0.067	5.81401e-192	7.84098e-21	4.15316e-196	15
Nxpe2	3.01819e-18	0.456107	0.667	0.066	8.45034e-14	7.08258e-180	0.564667	0.592	0.062	1.98298e-175	3.01819e-18	1.41652e-179	15
Ppif	1.80237e-13	0.440221	0.667	0.091	5.04627e-09	1.50937e-177	0.687364	0.704	0.094	4.22593e-173	1.80237e-13	3.01873e-177	15
Sord	3.41911e-27	0.506314	0.917	0.083	9.57282e-23	6.18712e-158	0.456592	0.533	0.055	1.73227e-153	3.41911e-27	1.23742e-157	15
Atp2b4	3.70534e-57	0.476288	0.75	0.026	1.03742e-52	7.14359e-157	0.332322	0.402	0.031	2.00006e-152	3.70534e-57	1.42872e-156	15
Hmha1	1.85586e-37	0.449078	0.583	0.024	5.19602e-33	2.09549e-143	0.329956	0.408	0.034	5.86696e-139	1.85586e-37	4.19098e-143	15
Ccne1	4.63485e-11	0.310873	0.583	0.078	1.29767e-06	2.50238e-139	0.781243	0.645	0.095	7.00617e-135	4.63485e-11	5.00477e-139	15
Phgdh	1.58163e-30	1.31572	1	0.096	4.42826e-26	4.42804e-136	0.819239	0.728	0.13	1.23976e-131	1.58163e-30	8.85608e-136	15
Hist1h1b	1.40229e-12	0.308225	0.583	0.068	3.92614e-08	1.50261e-133	0.476095	0.556	0.071	4.207e-129	1.40229e-12	3.00521e-133	15
Gm42749	5.98981e-58	0.422347	0.917	0.037	1.67703e-53	2.65813e-128	0.402798	0.45	0.047	7.44224e-124	5.98981e-58	5.31627e-128	15
Chchd10	1.77511e-19	0.853238	1	0.158	4.96994e-15	2.76619e-127	0.934445	0.787	0.17	7.74477e-123	1.77511e-19	5.53237e-127	15
Dut	1.02492e-10	0.852139	1	0.363	2.86958e-06	1.52454e-125	1.51293	0.976	0.372	4.26842e-121	1.02492e-10	3.04909e-125	15
Mthfd2	1.65836e-19	0.794785	1	0.15	4.64308e-15	1.38736e-122	0.816576	0.799	0.184	3.88434e-118	1.65836e-19	2.77473e-122	15
Chaf1a	1.63506e-10	0.441028	0.75	0.141	4.57785e-06	1.53466e-117	0.515703	0.781	0.163	4.29673e-113	1.63506e-10	3.06931e-117	15
Hebp1	1.73858e-08	0.288151	0.583	0.105	0.000486769	3.66725e-116	0.900714	0.669	0.127	1.02676e-111	1.73858e-08	7.33451e-116	15
Cpox	4.92139e-15	1.0361	1	0.242	1.37789e-10	8.05929e-113	1.78437	0.822	0.232	2.25644e-108	4.92139e-15	1.61186e-112	15
Rpl14	2.01271e-09	1.05574	1	1	5.63517e-05	3.68427e-109	0.982385	1	1	1.03152e-104	2.01271e-09	7.36854e-109	15
Cdt1	2.02827e-14	0.412768	0.75	0.101	5.67874e-10	5.03289e-108	0.529641	0.639	0.118	1.40911e-103	2.02827e-14	1.00658e-107	15
Ifrd2	6.41106e-09	0.670842	0.833	0.228	0.000179497	2.72055e-107	0.990011	0.811	0.232	7.61699e-103	6.41106e-09	5.4411e-107	15
Mcm5	8.13271e-08	0.493161	0.75	0.193	0.002277	1.54601e-106	0.768163	0.84	0.22	4.32851e-102	8.13271e-08	3.09201e-106	15
Mt1	4.6969e-14	2.42286	1	0.282	1.31504e-09	2.54578e-105	2.07774	0.876	0.305	7.12766e-101	4.6969e-14	5.09155e-105	15
Rps12	2.00531e-09	1.25485	1	0.999	5.61447e-05	1.44946e-104	1.12312	1	0.999	4.05821e-100	2.00531e-09	2.89893e-104	15
Rps18	2.01271e-09	1.02413	1	1	5.63517e-05	5.30428e-103	0.864817	1	1	1.48509e-98	2.01271e-09	1.06086e-102	15
Rpsa	2.4036e-09	1.04894	1	0.999	6.72959e-05	8.26069e-103	1.08414	1	1	2.31283e-98	2.4036e-09	1.65214e-102	15
Anp32b	2.01226e-08	1.00767	1	0.897	0.000563393	8.83188e-103	1.42379	1	0.921	2.47275e-98	2.01226e-08	1.76638e-102	15
Rpl8	2.20735e-09	0.782151	1	1	6.18014e-05	1.16946e-102	0.795042	1	1	3.27425e-98	2.20735e-09	2.33891e-102	15
Hist1h2ap	7.30873e-08	1.62558	0.667	0.171	0.0020463	1.20436e-101	0.96147	0.781	0.176	3.37197e-97	7.30873e-08	2.40872e-101	15
Eif5a	4.35224e-09	1.10536	1	0.989	0.000121854	1.91506e-101	1.07075	1	0.991	5.36177e-97	4.35224e-09	3.83011e-101	15
Rps23	2.31237e-09	0.782847	1	1	6.47418e-05	2.09445e-101	0.762383	1	1	5.86404e-97	2.31237e-09	4.1889e-101	15
Rbm38	4.56994e-12	0.437129	0.833	0.159	1.27949e-07	4.82991e-101	0.637849	0.769	0.197	1.35228e-96	4.56994e-12	9.65982e-101	15
Rplp1	2.19747e-09	0.903756	1	1	6.15247e-05	7.31801e-101	0.868497	1	1	2.0489e-96	2.19747e-09	1.4636e-100	15
Rps27a	1.73392e-08	0.58911	1	1	0.000485463	3.56649e-100	0.724322	1	1	9.98545e-96	1.73392e-08	7.13297e-100	15
Rpl12	4.46002e-09	0.837422	1	0.995	0.000124872	4.27584e-100	1.03331	1	0.995	1.19715e-95	4.46002e-09	8.55168e-100	15
Rps6	2.13557e-09	0.801336	1	1	5.97916e-05	1.41828e-99	0.74158	1	1	3.9709e-95	2.13557e-09	2.83656e-99	15
Rplp0	2.09411e-09	0.983703	1	1	5.86308e-05	1.20683e-98	0.816797	1	1	3.37889e-94	2.09411e-09	2.41367e-98	15
Rpl13	3.25258e-09	0.729192	1	1	9.10657e-05	1.2124e-98	0.683676	1	1	3.39448e-94	3.25258e-09	2.4248e-98	15
Rpl41	2.65583e-07	0.732599	1	1	0.00743579	2.24255e-98	0.651568	1	1	6.2787e-94	2.65583e-07	4.48511e-98	15
Rps3a1	4.25574e-09	0.69422	1	1	0.000119152	4.12754e-98	0.756557	1	1	1.15563e-93	4.25574e-09	8.25508e-98	15
Rps2	4.22513e-09	0.946004	1	1	0.000118295	5.47458e-98	0.923774	1	1	1.53277e-93	4.22513e-09	1.09492e-97	15
Rpl18	4.93494e-09	0.681147	1	1	0.000138169	5.97419e-98	0.720852	1	1	1.67265e-93	4.93494e-09	1.19484e-97	15
Tnfaip2	6.62334e-25	1.10462	0.917	0.1	1.8544e-20	1.94978e-97	0.650753	0.805	0.228	5.45899e-93	6.62334e-25	3.89955e-97	15
Lig1	4.74334e-05	0.310509	0.833	0.301	1	2.45061e-97	0.864962	0.953	0.331	6.86121e-93	4.74334e-05	4.90121e-97	15
Rpl39	5.12076e-08	0.734273	1	1	0.00143371	9.51348e-97	0.705624	1	0.999	2.66358e-92	5.12076e-08	1.9027e-96	15
Rpl21	2.2209e-09	0.787298	1	1	6.21807e-05	1.5493e-96	0.742484	1	1	4.33772e-92	2.2209e-09	3.09859e-96	15
Rpl11	2.40555e-09	0.759928	1	1	6.73507e-05	1.61778e-96	0.639653	1	1	4.52947e-92	2.40555e-09	3.23557e-96	15
Rps10	3.86946e-09	0.793947	1	0.999	0.000108337	2.41034e-96	0.831525	1	1	6.74848e-92	3.86946e-09	4.82069e-96	15
Siva1	6.50299e-08	0.77687	1	0.514	0.00182071	4.90799e-96	0.925843	0.964	0.476	1.37414e-91	6.50299e-08	9.81598e-96	15
Rps8	2.39481e-09	0.72695	1	1	6.70498e-05	1.72948e-95	0.646237	1	1	4.8422e-91	2.39481e-09	3.45896e-95	15
Rps20	2.69333e-09	0.849373	1	1	7.54079e-05	2.42823e-95	0.837501	1	1	6.79855e-91	2.69333e-09	4.85646e-95	15
Dtl	4.93799e-08	0.349373	0.667	0.142	0.00138254	3.83089e-95	0.651575	0.686	0.155	1.07257e-90	4.93799e-08	7.66177e-95	15
Rps5	2.32371e-09	0.842753	1	1	6.50592e-05	4.14835e-95	0.729241	1	1	1.16146e-90	2.32371e-09	8.2967e-95	15
Rpl27a	5.9879e-09	0.640651	1	1	0.000167649	5.19811e-95	0.569943	1	1	1.45537e-90	5.9879e-09	1.03962e-94	15
Rpl32	2.51565e-09	0.927808	1	1	7.04332e-05	5.41552e-95	0.736724	1	1	1.51624e-90	2.51565e-09	1.0831e-94	15
Rplp2	2.31709e-09	0.737218	1	1	6.48739e-05	7.37352e-95	0.67314	1	1	2.06444e-90	2.31709e-09	1.4747e-94	15
Rpia	4.29197e-12	0.514459	1	0.244	1.20167e-07	9.1409e-95	0.781998	0.799	0.244	2.55927e-90	4.29197e-12	1.82818e-94	15
Atpif1	2.81505e-09	1.14971	1	0.959	7.88158e-05	3.15088e-94	1.05998	1	0.974	8.82182e-90	2.81505e-09	6.30175e-94	15
Nme4	6.79964e-24	0.72362	0.833	0.08	1.90376e-19	3.92895e-94	0.358742	0.538	0.092	1.10003e-89	6.79964e-24	7.85791e-94	15
Rps16	8.05201e-09	0.56159	1	1	0.00022544	4.51366e-94	0.553672	1	1	1.26373e-89	8.05201e-09	9.02732e-94	15
Rpl28	1.29712e-08	0.705894	1	1	0.000363168	6.41601e-94	0.674108	1	1	1.79636e-89	1.29712e-08	1.2832e-93	15
Rps3	2.6846e-09	0.712796	1	1	7.51635e-05	6.587e-94	0.681065	1	1	1.84423e-89	2.6846e-09	1.3174e-93	15
Rps26	4.77969e-09	0.882613	1	0.998	0.000133822	7.89027e-94	0.953552	1	0.999	2.20912e-89	4.77969e-09	1.57805e-93	15
Rps13	2.83341e-09	0.67656	1	1	7.93297e-05	2.26763e-93	0.691123	1	1	6.34892e-89	2.83341e-09	4.53526e-93	15
Snrpf	3.43059e-09	1.0608	1	0.896	9.60495e-05	2.47752e-93	1.03515	0.982	0.908	6.93656e-89	3.43059e-09	4.95504e-93	15
Tspan33	5.61675e-35	0.69473	0.917	0.067	1.57258e-30	7.99054e-93	0.677996	0.556	0.104	2.23719e-88	5.61675e-35	1.59811e-92	15
Ncl	3.31319e-08	1.42623	1	0.949	0.000927626	9.46956e-93	1.41068	1	0.958	2.65129e-88	3.31319e-08	1.89391e-92	15
Mcm2	0.0567023	0.723155	0.417	0.242	1	9.597e-93	0.666943	0.846	0.235	2.68697e-88	0.0567023	1.9194e-92	15
Gnb2l1	2.45798e-09	1.0354	1	0.993	6.88187e-05	1.06861e-92	0.889512	1	0.994	2.99188e-88	2.45798e-09	2.13721e-92	15
Rpl26	4.18466e-09	0.742908	1	1	0.000117162	4.38661e-92	0.650161	1	1	1.22816e-87	4.18466e-09	8.77323e-92	15
Rps15	9.55081e-06	0.318225	1	1	0.267404	5.12337e-92	0.564625	1	1	1.43444e-87	9.55081e-06	1.02467e-91	15
Rpl37	8.25067e-08	0.785788	1	1	0.00231002	1.07458e-91	0.575346	1	1	3.00862e-87	8.25067e-08	2.14917e-91	15
Rps15a	3.02921e-09	0.737344	1	1	8.48118e-05	1.33247e-91	0.641965	1	1	3.73064e-87	3.02921e-09	2.66493e-91	15
Rpl17	2.25099e-09	0.768665	1	1	6.30233e-05	2.52231e-91	0.6123	1	1	7.06198e-87	2.25099e-09	5.04463e-91	15
Rpl10a	2.10127e-07	0.792133	1	0.999	0.00588315	9.27683e-91	0.727265	1	1	2.59733e-86	2.10127e-07	1.85537e-90	15
Rps17	7.54242e-07	0.606842	1	1	0.0211173	2.6562e-90	0.61469	1	1	7.43682e-86	7.54242e-07	5.3124e-90	15
Rpl23	2.74185e-09	0.672303	1	1	7.67664e-05	7.93028e-90	0.522683	1	1	2.22032e-85	2.74185e-09	1.58606e-89	15
Mki67	2.87391e-07	0.460514	0.75	0.192	0.00804637	9.63301e-90	0.931876	0.817	0.236	2.69705e-85	2.87391e-07	1.9266e-89	15
Cd47	2.32759e-08	1.139	1	0.644	0.00065168	1.10999e-89	1.03722	1	0.621	3.10775e-85	2.32759e-08	2.21998e-89	15
Cenpv	8.93206e-13	0.425569	0.667	0.096	2.5008e-08	9.45031e-89	0.398675	0.574	0.112	2.6459e-84	8.93206e-13	1.89006e-88	15
Rpl7a	4.44933e-09	0.736501	1	0.999	0.000124572	1.13344e-88	0.681135	1	0.999	3.17341e-84	4.44933e-09	2.26688e-88	15
Ranbp1	3.7403e-07	0.699396	1	0.911	0.0104721	1.36988e-88	0.979855	1	0.938	3.8354e-84	3.7403e-07	2.73977e-88	15
Rrm2	2.0956e-05	0.27261	0.667	0.178	0.586727	3.44575e-88	1.34501	0.817	0.227	9.64742e-84	2.0956e-05	6.89151e-88	15
Rpl19	2.84607e-09	0.668785	1	1	7.96842e-05	7.50506e-88	0.556068	1	1	2.10127e-83	2.84607e-09	1.50101e-87	15
Rps4x	2.74519e-09	0.761765	1	1	7.68599e-05	1.07534e-87	0.635712	1	0.999	3.01074e-83	2.74519e-09	2.15068e-87	15
Fxn	3.21635e-07	0.43918	0.833	0.246	0.00900513	1.20362e-87	0.615289	0.828	0.27	3.36988e-83	3.21635e-07	2.40723e-87	15
Rpl31	3.68334e-08	0.628636	1	1	0.00103126	1.3429e-87	0.566498	1	1	3.75985e-83	3.68334e-08	2.6858e-87	15
Rps24	2.00887e-08	0.551282	1	1	0.000562445	1.92461e-87	0.582267	1	1	5.38851e-83	2.00887e-08	3.84921e-87	15
Rpl36	2.48913e-08	0.862021	1	1	0.000696907	2.17132e-87	0.727831	1	1	6.07925e-83	2.48913e-08	4.34263e-87	15
Rps25	3.84835e-05	0.485282	1	1	1	3.28127e-87	0.554002	1	1	9.1869e-83	3.84835e-05	6.56254e-87	15
Birc5	3.45296e-08	0.346109	1	0.238	0.000966759	5.07409e-87	0.871594	0.959	0.316	1.42064e-82	3.45296e-08	1.01482e-86	15
Cks2	7.56992e-09	1.10136	1	0.443	0.000211943	1.18728e-86	1.20438	0.988	0.56	3.32415e-82	7.56992e-09	2.37456e-86	15
Ran	1.27939e-06	0.683781	1	0.953	0.0358204	2.98469e-86	0.948897	1	0.967	8.35653e-82	1.27939e-06	5.96938e-86	15
Rpl9	1.72232e-07	0.465845	1	1	0.00482215	9.49367e-86	0.510245	1	1	2.65804e-81	1.72232e-07	1.89873e-85	15
Fam132a	2.35588e-15	1.12746	1	0.237	6.59599e-11	2.24012e-85	1.2157	0.71	0.206	6.2719e-81	2.35588e-15	4.48025e-85	15
Hsp90aa1	1.06706e-05	1.16091	1	0.923	0.298755	8.0155e-85	1.1599	1	0.965	2.24418e-80	1.06706e-05	1.6031e-84	15
Ptma	1.0607e-08	0.805014	1	1	0.000296974	1.82127e-84	0.843694	1	1	5.0992e-80	1.0607e-08	3.64254e-84	15
H2afz	1.1097e-05	0.605574	1	0.992	0.310694	2.04501e-84	0.993811	1	0.993	5.72562e-80	1.1097e-05	4.09002e-84	15
Dtymk	4.09431e-07	0.761969	1	0.56	0.0114633	2.77312e-84	0.881722	0.982	0.633	7.76418e-80	4.09431e-07	5.54624e-84	15
Rpl13a	6.43738e-08	0.500027	1	1	0.00180234	1.23195e-83	0.458614	1	1	3.44921e-79	6.43738e-08	2.4639e-83	15
Tipin	3.39491e-05	0.548893	0.917	0.451	0.950507	4.04444e-83	0.939249	0.97	0.503	1.13236e-78	3.39491e-05	8.08888e-83	15
Khk	0.00135041	0.256008	0.5	0.184	1	5.69914e-83	0.546003	0.675	0.165	1.59564e-78	0.00135041	1.13983e-82	15
Rpl6	5.76272e-07	0.471122	1	1	0.0161345	9.34105e-83	0.513616	1	1	2.61531e-78	5.76272e-07	1.86821e-82	15
Mcm10	3.43603e-26	0.280141	0.667	0.044	9.6202e-22	1.65854e-82	0.25869	0.396	0.055	4.64359e-78	3.43603e-26	3.31708e-82	15
Hdgf	3.03555e-09	1.43579	1	0.851	8.49893e-05	1.70157e-82	1.11431	0.994	0.901	4.76407e-78	3.03555e-09	3.40315e-82	15
Rfc5	1.38167e-10	0.53554	0.833	0.192	3.8684e-06	1.743e-82	0.512045	0.763	0.216	4.88005e-78	1.38167e-10	3.486e-82	15
Rpl36a	2.05848e-09	0.951931	1	0.999	5.76332e-05	3.03167e-82	0.636145	1	0.999	8.48808e-78	2.05848e-09	6.06335e-82	15
Rpl23a	5.44772e-07	0.582213	1	1	0.0152525	3.8827e-82	0.562094	1	1	1.08708e-77	5.44772e-07	7.76539e-82	15
Rps9	3.98625e-09	0.570058	1	1	0.000111607	6.51466e-82	0.508945	1	1	1.82397e-77	3.98625e-09	1.30293e-81	15
Rps21	5.06469e-09	0.773081	1	0.999	0.000141801	1.02923e-81	0.577193	1	0.999	2.88163e-77	5.06469e-09	2.05846e-81	15
Pabpc4	0.00240913	0.372153	0.583	0.296	1	2.1879e-81	0.700535	0.858	0.337	6.12569e-77	0.00240913	4.37581e-81	15
Gypc	9.87577e-14	0.495569	0.917	0.174	2.76502e-09	3.8903e-81	0.676534	0.71	0.187	1.08921e-76	9.87577e-14	7.78061e-81	15
Rpl22	4.25596e-07	0.692546	1	0.997	0.0119158	6.33523e-81	0.623918	1	0.998	1.77374e-76	4.25596e-07	1.26705e-80	15
Car2	2.03461e-09	1.39207	1	0.651	5.69651e-05	3.75828e-80	2.33943	0.947	0.567	1.05224e-75	2.03461e-09	7.51656e-80	15
Rpl30	2.34463e-09	0.763724	1	0.999	6.56449e-05	4.17245e-80	0.53583	1	1	1.1682e-75	2.34463e-09	8.3449e-80	15
Mybl2	2.53327e-14	0.593515	0.667	0.088	7.09266e-10	2.33466e-79	0.399402	0.527	0.101	6.53659e-75	2.53327e-14	4.66933e-79	15
Rpl4	1.90605e-05	0.588361	1	1	0.533657	2.88757e-79	0.67518	1	1	8.08461e-75	1.90605e-05	5.77514e-79	15
Npm1	2.22286e-09	1.68489	1	0.974	6.22358e-05	5.04808e-79	1.31873	1	0.985	1.41336e-74	2.22286e-09	1.00962e-78	15
Hspe1	1.96872e-09	1.74306	1	0.899	5.51201e-05	5.90838e-79	1.33189	0.976	0.907	1.65423e-74	1.96872e-09	1.18168e-78	15
Rpl3	2.66117e-05	0.48142	1	1	0.745074	1.13951e-78	0.586744	1	1	3.19039e-74	2.66117e-05	2.27901e-78	15
Lyl1	0.22172	0.292621	0.417	0.332	1	1.16037e-78	0.58514	0.675	0.175	3.2488e-74	0.22172	2.32074e-78	15
Eef1g	3.1351e-09	1.04315	1	0.99	8.77764e-05	1.98923e-78	0.842401	0.994	0.994	5.56944e-74	3.1351e-09	3.97846e-78	15
Rpl29	1.43047e-08	0.544094	1	1	0.000400502	4.14424e-78	0.482073	1	1	1.1603e-73	1.43047e-08	8.28848e-78	15
Rps19	1.47609e-08	0.72976	1	1	0.000413276	1.07757e-77	0.469049	1	1	3.01698e-73	1.47609e-08	2.15514e-77	15
Top2a	2.48708e-11	1.07225	1	0.255	6.96334e-07	1.15835e-77	1.00207	0.905	0.316	3.24315e-73	2.48708e-11	2.3167e-77	15
Mrpl18	1.69677e-06	0.660681	1	0.753	0.0475061	1.93799e-77	0.901468	0.964	0.779	5.42599e-73	1.69677e-06	3.87598e-77	15
Nop56	0.00434945	0.673949	0.833	0.521	1	2.3413e-77	0.896793	0.941	0.522	6.55518e-73	0.00434945	4.6826e-77	15
Rpl18a	9.94967e-06	0.635854	1	1	0.278571	3.71872e-77	0.478554	1	1	1.04117e-72	9.94967e-06	7.43743e-77	15
Rpl35a	7.66774e-09	0.540336	1	1	0.000214681	8.7462e-77	0.510572	1	1	2.44876e-72	7.66774e-09	1.74924e-76	15
Rpl22l1	5.93027e-08	0.716346	1	0.991	0.00166036	1.99817e-76	0.708971	1	0.992	5.59447e-72	5.93027e-08	3.99634e-76	15
Rpl5	5.88762e-09	0.815369	1	0.997	0.000164842	2.11928e-76	0.625834	1	0.997	5.93356e-72	5.88762e-09	4.23856e-76	15
Rpl10	5.68854e-09	0.607902	1	1	0.000159268	2.47826e-76	0.55505	1	0.999	6.93864e-72	5.68854e-09	4.95652e-76	15
Hmgb2	0.0058047	0.250793	1	0.825	1	3.10085e-76	1.24919	1	0.836	8.68176e-72	0.0058047	6.2017e-76	15
Srsf2	8.31845e-08	0.702988	1	0.942	0.002329	3.70806e-76	0.862716	1	0.941	1.03818e-71	8.31845e-08	7.41613e-76	15
Hmgb3	0.000317887	0.818116	0.833	0.561	1	4.31279e-76	0.959329	0.976	0.594	1.2075e-71	0.000317887	8.62558e-76	15
Cdca8	0.0129432	0.489669	0.5	0.226	1	1.48642e-75	0.675045	0.834	0.279	4.16168e-71	0.0129432	2.97284e-75	15
Fen1	5.56518e-10	0.492173	0.917	0.224	1.55814e-05	7.78426e-75	0.711756	0.757	0.24	2.17944e-70	5.56518e-10	1.55685e-74	15
Rpl35	1.87386e-08	0.747099	1	0.999	0.000524644	9.00357e-75	0.511892	1	0.999	2.52082e-70	1.87386e-08	1.80071e-74	15
Cdca7	7.13977e-13	0.697508	1	0.26	1.99899e-08	1.27347e-74	0.507545	0.704	0.202	3.56546e-70	7.13977e-13	2.54694e-74	15
Rpl37a	1.08418e-08	0.710606	1	1	0.000303548	7.47218e-74	0.466667	1	1	2.09206e-69	1.08418e-08	1.49444e-73	15
Gmnn	0.000204318	0.394971	0.833	0.403	1	1.19071e-73	0.730128	0.941	0.425	3.33374e-69	0.000204318	2.38142e-73	15
Rpl36al	1.69488e-08	0.674924	1	0.991	0.000474533	1.67635e-73	0.605089	1	0.995	4.69345e-69	1.69488e-08	3.35271e-73	15
Rps7	1.02761e-08	0.603114	1	1	0.00028771	3.92326e-73	0.453363	1	1	1.09843e-68	1.02761e-08	7.84652e-73	15
Nap1l1	2.81561e-08	0.873314	1	0.826	0.000788313	4.7894e-73	0.837031	0.988	0.836	1.34094e-68	2.81561e-08	9.5788e-73	15
Htra2	0.00140767	0.28782	0.583	0.249	1	5.45752e-73	0.569911	0.74	0.24	1.528e-68	0.00140767	1.0915e-72	15
Spc24	3.78251e-10	0.402117	0.917	0.196	1.05903e-05	6.47424e-73	0.586617	0.763	0.23	1.81266e-68	3.78251e-10	1.29485e-72	15
Atic	1.45581e-10	0.437009	0.833	0.168	4.07598e-06	1.52082e-72	0.408069	0.669	0.18	4.258e-68	1.45581e-10	3.04164e-72	15
Eef1b2	5.14377e-09	0.794807	1	0.984	0.000144015	2.19293e-72	0.671388	1	0.987	6.13977e-68	5.14377e-09	4.38587e-72	15
Cenpw	3.44998e-07	0.480372	0.833	0.246	0.00965924	2.26039e-72	0.583475	0.864	0.311	6.32865e-68	3.44998e-07	4.52079e-72	15
Ccna2	6.78258e-09	0.491769	0.833	0.18	0.000189899	3.11325e-72	0.739394	0.757	0.223	8.71647e-68	6.78258e-09	6.22649e-72	15
Serbp1	1.38051e-07	0.738351	1	0.985	0.00386515	1.12177e-71	0.762156	1	0.988	3.14072e-67	1.38051e-07	2.24353e-71	15
Taok3	1.27032e-16	0.747441	1	0.184	3.55665e-12	1.47607e-71	0.48614	0.704	0.212	4.1327e-67	1.27032e-16	2.95214e-71	15
Rps12-ps3	3.6395e-07	0.797219	1	0.717	0.0101899	2.47398e-71	0.790937	0.97	0.747	6.92666e-67	3.6395e-07	4.94796e-71	15
Lockd	1.95177e-09	0.543931	0.833	0.188	5.46456e-05	5.27311e-71	0.653389	0.751	0.217	1.47637e-66	1.95177e-09	1.05462e-70	15
Cdca3	0.000493768	0.267745	0.583	0.191	1	5.64038e-71	0.612494	0.787	0.245	1.57919e-66	0.000493768	1.12808e-70	15
Prdx6	3.72437e-07	0.868635	1	0.712	0.0104275	9.2056e-71	1.00776	0.982	0.725	2.57738e-66	3.72437e-07	1.84112e-70	15
Nudt19	9.61793e-09	0.533911	0.917	0.307	0.000269283	1.9138e-70	0.707014	0.793	0.324	5.35825e-66	9.61793e-09	3.8276e-70	15
Comtd1	7.97384e-16	0.542633	0.667	0.077	2.23252e-11	2.04033e-70	0.267381	0.438	0.077	5.71251e-66	7.97384e-16	4.08066e-70	15
Rpl24	7.08522e-09	0.561374	1	1	0.000198372	7.05549e-70	0.406076	1	1	1.9754e-65	7.08522e-09	1.4111e-69	15
Atp5g1	3.6501e-09	1.08046	1	0.948	0.000102196	7.48592e-70	0.879477	1	0.966	2.09591e-65	3.6501e-09	1.49718e-69	15
Rbm3	3.12062e-06	0.555361	1	0.978	0.0873711	1.09327e-69	0.801697	1	0.987	3.06093e-65	3.12062e-06	2.18654e-69	15
Uhrf1	5.15967e-10	0.452312	0.75	0.153	1.4446e-05	2.24715e-69	0.516441	0.68	0.189	6.29156e-65	5.15967e-10	4.49429e-69	15
Dek	6.32884e-06	0.710965	1	0.819	0.177195	3.5739e-69	1.0322	0.988	0.817	1.00062e-64	6.32884e-06	7.1478e-69	15
Erh	3.29912e-06	0.649164	1	0.962	0.0923689	5.12635e-69	0.706579	1	0.973	1.43528e-64	3.29912e-06	1.02527e-68	15
Snrpg	5.92796e-08	0.918322	1	0.911	0.00165971	5.96394e-69	0.720896	0.988	0.907	1.66978e-64	5.92796e-08	1.19279e-68	15
Mcm7	4.8924e-10	0.515208	0.917	0.238	1.36977e-05	1.27074e-68	0.681198	0.775	0.268	3.55782e-64	4.8924e-10	2.54148e-68	15
Nasp	0.000181384	0.405767	0.917	0.516	1	2.99289e-68	0.790325	0.929	0.526	8.3795e-64	0.000181384	5.98578e-68	15
Cox6b2	5.56124e-14	1.29139	0.917	0.196	1.55704e-09	5.18303e-68	0.721931	0.793	0.288	1.45115e-63	5.56124e-14	1.03661e-67	15
Mcm3	6.20635e-06	0.404581	0.833	0.302	0.173765	1.11743e-67	0.719253	0.822	0.327	3.12857e-63	6.20635e-06	2.23485e-67	15
Ak2	0.000530507	0.490402	0.833	0.596	1	2.02932e-67	0.716466	0.935	0.607	5.68169e-63	0.000530507	4.05864e-67	15
Rpl7	9.71387e-06	0.309308	1	1	0.271969	2.23664e-67	0.41949	1	1	6.26215e-63	9.71387e-06	4.47329e-67	15
Metap2	4.02062e-06	0.643457	1	0.921	0.112569	2.44634e-67	0.84076	1	0.928	6.84927e-63	4.02062e-06	4.89268e-67	15
Ddx21	1.35626e-08	0.761843	1	0.585	0.000379725	7.57472e-67	0.926574	0.911	0.618	2.12077e-62	1.35626e-08	1.51494e-66	15
Srsf3	2.6358e-05	0.710167	1	0.944	0.737971	2.59558e-66	0.803179	0.994	0.94	7.26709e-62	2.6358e-05	5.19115e-66	15
Sgol1	4.14962e-06	0.316409	0.5	0.11	0.116181	4.33882e-66	0.308774	0.568	0.131	1.21478e-61	4.14962e-06	8.67764e-66	15
Pa2g4	0.00135653	1.09455	1	0.754	1	5.81591e-66	0.821187	0.97	0.759	1.62834e-61	0.00135653	1.16318e-65	15
Glrx5	2.58441e-06	0.544968	1	0.841	0.0723584	7.74659e-66	1.03231	0.976	0.855	2.16889e-61	2.58441e-06	1.54932e-65	15
Srsf7	0.009089	0.530122	1	0.743	1	2.24235e-65	0.848695	0.964	0.754	6.27814e-61	0.009089	4.48471e-65	15
Hspd1	3.11553e-06	1.11013	0.917	0.654	0.0872285	3.84846e-65	0.979079	0.941	0.688	1.07749e-60	3.11553e-06	7.69693e-65	15
Esco2	0.000552598	0.316023	0.333	0.08	1	5.99362e-65	0.354243	0.467	0.093	1.67809e-60	0.000552598	1.19872e-64	15
C1qbp	9.50207e-09	0.829092	1	0.678	0.000266039	7.07088e-65	0.913322	0.947	0.717	1.97971e-60	9.50207e-09	1.41418e-64	15
Gnl3	1.12626e-11	0.968713	1	0.36	3.15331e-07	1.43072e-64	0.891336	0.811	0.403	4.00572e-60	1.12626e-11	2.86143e-64	15
Rrm1	5.19155e-06	0.600346	0.833	0.298	0.145353	2.4317e-64	0.708143	0.805	0.318	6.80828e-60	5.19155e-06	4.8634e-64	15
Wdhd1	1.88028e-14	0.327058	0.583	0.062	5.26441e-10	3.1108e-64	0.268694	0.361	0.057	8.70961e-60	1.88028e-14	6.2216e-64	15
Fignl1	9.59406e-12	0.378582	0.583	0.076	2.68615e-07	9.74064e-64	0.412931	0.426	0.081	2.72719e-59	9.59406e-12	1.94813e-63	15
Uros	1.49953e-18	0.438786	0.667	0.064	4.1984e-14	9.76826e-64	0.374855	0.379	0.065	2.73492e-59	1.49953e-18	1.95365e-63	15
Snrpd1	0.000458887	0.697852	1	0.783	1	1.0651e-63	0.81941	0.982	0.814	2.98208e-59	0.000458887	2.13021e-63	15
Spire1	1.39876e-15	0.587845	0.667	0.08	3.91624e-11	1.38484e-63	0.253202	0.467	0.093	3.87729e-59	1.39876e-15	2.76969e-63	15
Rps28	1.03676e-06	0.621505	1	0.999	0.0290271	3.9632e-63	0.537418	1	0.999	1.10962e-58	1.03676e-06	7.92641e-63	15
Npm3	8.65183e-11	1.47376	1	0.459	2.42234e-06	9.19689e-63	1.12598	0.834	0.463	2.57495e-58	8.65183e-11	1.83938e-62	15
Hnrnpab	2.12322e-08	0.778117	1	0.892	0.000594459	1.05942e-62	0.645818	0.994	0.918	2.96616e-58	2.12322e-08	2.11884e-62	15
Rfc4	1.76649e-05	0.413501	0.667	0.196	0.494581	2.74238e-62	0.592432	0.704	0.225	7.67811e-58	1.76649e-05	5.48475e-62	15
Gm10076	5.06916e-06	0.896684	1	0.994	0.141926	3.50113e-62	0.536455	1	0.988	9.80247e-58	5.06916e-06	7.00227e-62	15
Nhp2	3.42565e-08	0.999771	1	0.775	0.000959113	9.15234e-62	0.905695	0.959	0.826	2.56247e-57	3.42565e-08	1.83047e-61	15
Ccnb1	1.24379e-10	0.370441	0.75	0.126	3.48236e-06	1.05015e-61	0.552354	0.639	0.175	2.94022e-57	1.24379e-10	2.10031e-61	15
Gpx1	4.81291e-07	0.851243	1	0.962	0.0134752	1.45444e-61	0.761126	1	0.982	4.07215e-57	4.81291e-07	2.90888e-61	15
Rpa2	0.00629833	0.316649	0.583	0.308	1	3.49804e-61	0.557842	0.811	0.312	9.79382e-57	0.00629833	6.99609e-61	15
Eef1d	1.39563e-06	0.633088	1	0.895	0.039075	1.0508e-60	0.764911	0.976	0.915	2.94204e-56	1.39563e-06	2.10161e-60	15
Dnajc9	3.86575e-06	0.540016	0.833	0.351	0.108233	1.20226e-60	0.685806	0.899	0.41	3.36609e-56	3.86575e-06	2.40452e-60	15
Hint1	0.00110828	0.412546	1	0.976	1	2.45627e-60	0.531484	1	0.982	6.87706e-56	0.00110828	4.91254e-60	15
Rgs10	1.19005e-11	1.12218	1	0.348	3.33191e-07	2.48835e-60	0.646513	0.84	0.402	6.96689e-56	1.19005e-11	4.97671e-60	15
Cenpa	7.61095e-07	0.516465	0.917	0.265	0.0213091	2.5107e-60	0.670269	0.852	0.333	7.02945e-56	7.61095e-07	5.02139e-60	15
Unc119	9.30198e-09	0.510363	0.583	0.107	0.000260437	6.93957e-60	0.306968	0.473	0.103	1.94294e-55	9.30198e-09	1.38791e-59	15
Hnrnpa1	7.08277e-08	0.807254	1	0.903	0.00198303	7.69546e-60	0.753638	0.976	0.922	2.15457e-55	7.08277e-08	1.53909e-59	15
Rcc2	2.51502e-10	0.82328	1	0.429	7.04154e-06	7.72369e-60	0.679928	0.852	0.47	2.16248e-55	2.51502e-10	1.54474e-59	15
Mogs	2.79179e-19	0.688178	0.917	0.124	7.81646e-15	1.39219e-59	0.357147	0.527	0.132	3.89785e-55	2.79179e-19	2.78438e-59	15
Cacybp	0.0144248	0.694494	1	0.695	1	1.66461e-59	0.8018	0.97	0.704	4.66056e-55	0.0144248	3.32921e-59	15
Minpp1	6.18572e-09	1.18864	0.917	0.435	0.000173188	1.67341e-59	0.814816	0.846	0.447	4.68523e-55	6.18572e-09	3.34683e-59	15
Fabp5	7.87641e-07	0.867649	1	0.529	0.0220524	1.81436e-59	1.24815	0.923	0.544	5.07985e-55	7.87641e-07	3.62872e-59	15
E2f4	1.32649e-07	0.651719	1	0.536	0.0037139	1.93848e-59	0.79611	0.888	0.539	5.42737e-55	1.32649e-07	3.87697e-59	15
Dctpp1	7.37399e-07	0.712898	0.917	0.457	0.0206457	1.95502e-59	0.764786	0.876	0.515	5.47367e-55	7.37399e-07	3.91004e-59	15
Gart	0.000153992	0.289802	0.667	0.254	1	2.28438e-59	0.433982	0.704	0.241	6.39581e-55	0.000153992	4.56876e-59	15
Nsun2	0.000122839	0.574722	0.833	0.427	1	2.36212e-59	0.686869	0.84	0.456	6.61347e-55	0.000122839	4.72424e-59	15
Fau	5.7501e-08	0.43214	1	1	0.00160991	3.59401e-59	0.338317	1	1	1.00625e-54	5.7501e-08	7.18803e-59	15
Srm	1.7635e-08	1.33447	1	0.552	0.000493746	6.17799e-59	0.925282	0.888	0.602	1.72971e-54	1.7635e-08	1.2356e-58	15
Pole3	0.00294471	0.251476	0.833	0.472	1	8.24715e-59	0.645292	0.911	0.506	2.30904e-54	0.00294471	1.64943e-58	15
Orc2	4.08645e-05	0.293874	0.667	0.215	1	1.21783e-58	0.412589	0.68	0.218	3.40968e-54	4.08645e-05	2.43566e-58	15
Impdh2	3.98548e-09	1.1322	1	0.796	0.000111585	2.08749e-58	0.76853	0.964	0.818	5.84456e-54	3.98548e-09	4.17498e-58	15
Eef1e1	4.28492e-10	0.901011	1	0.375	1.19969e-05	3.56147e-58	0.678642	0.84	0.422	9.9714e-54	4.28492e-10	7.12294e-58	15
Tomm5	2.66805e-09	1.06528	1	0.72	7.47e-05	2.47725e-57	1.04417	0.905	0.768	6.93581e-53	2.66805e-09	4.95451e-57	15
Fam195a	1.23879e-10	0.342111	0.75	0.134	3.46837e-06	2.86596e-57	0.414428	0.521	0.133	8.02411e-53	1.23879e-10	5.73192e-57	15
Oaz1	6.74929e-06	0.362996	1	1	0.188967	3.84254e-57	0.353375	1	1	1.07583e-52	6.74929e-06	7.68507e-57	15
Nop10	2.97199e-06	0.867789	1	0.922	0.0832098	4.27361e-57	0.821108	0.964	0.927	1.19653e-52	2.97199e-06	8.54723e-57	15
Phb2	1.99301e-08	0.960021	1	0.888	0.000558004	7.71918e-57	0.743765	0.964	0.897	2.16122e-52	1.99301e-08	1.54384e-56	15
Usp1	0.00120936	0.449382	0.833	0.429	1	8.69658e-57	0.544594	0.911	0.475	2.43487e-52	0.00120936	1.73932e-56	15
Tmem14c	3.96583e-05	0.624795	1	0.903	1	3.56933e-56	1.23366	1	0.907	9.99341e-52	3.96583e-05	7.13866e-56	15
Snrpe	1.34155e-06	0.555105	1	0.929	0.0375608	3.91795e-56	0.538607	1	0.946	1.09695e-51	1.34155e-06	7.83591e-56	15
Nop58	1.55015e-09	1.14073	1	0.416	4.3401e-05	5.24133e-56	0.669593	0.882	0.469	1.46747e-51	1.55015e-09	1.04827e-55	15
Ppih	5.42474e-10	0.766988	1	0.319	1.51882e-05	6.92722e-56	0.472017	0.828	0.354	1.93948e-51	5.42474e-10	1.38544e-55	15
Cks1b	5.06557e-08	0.948238	1	0.479	0.00141826	1.03976e-55	0.721569	0.97	0.577	2.91111e-51	5.06557e-08	2.07951e-55	15
Set	4.06e-09	1.15203	1	0.895	0.000113672	1.12073e-55	0.822644	0.988	0.927	3.13782e-51	4.06e-09	2.24146e-55	15
Ppan	0.000201428	0.594506	0.667	0.26	1	3.48346e-55	0.532441	0.734	0.286	9.75299e-51	0.000201428	6.96692e-55	15
Anp32e	8.59384e-07	0.600811	1	0.543	0.024061	4.19508e-55	0.675513	0.953	0.592	1.17454e-50	8.59384e-07	8.39017e-55	15
Rps27l	3.42647e-08	0.627359	1	0.978	0.000959344	5.04282e-55	0.582079	1	0.988	1.41189e-50	3.42647e-08	1.00856e-54	15
Ptges3	6.83327e-06	0.525625	1	0.812	0.191318	5.75369e-55	0.575667	0.994	0.838	1.61092e-50	6.83327e-06	1.15074e-54	15
Zfpm1	0.000227257	0.366003	0.667	0.293	1	8.14135e-55	0.531858	0.763	0.332	2.27941e-50	0.000227257	1.62827e-54	15
Cd24a	1.1265e-13	1.61817	1	0.287	3.15398e-09	1.55806e-54	2.33335	0.793	0.452	4.36227e-50	1.1265e-13	3.11613e-54	15
Rcl1	5.06526e-05	0.742185	0.667	0.25	1	2.09812e-54	0.432591	0.675	0.237	5.87433e-50	5.06526e-05	4.19625e-54	15
Nhp2l1	0.0017799	0.651562	1	0.902	1	2.89201e-54	0.72108	0.982	0.911	8.09705e-50	0.0017799	5.78402e-54	15
Pabpc1	4.35528e-08	0.710722	1	0.976	0.00121939	1.08122e-53	0.658124	1	0.98	3.02721e-49	4.35528e-08	2.16245e-53	15
Rangrf	1.28466e-11	0.757985	0.917	0.248	3.59679e-07	1.22172e-53	0.583379	0.663	0.262	3.42057e-49	1.28466e-11	2.44344e-53	15
Bola3	4.44908e-08	0.713674	1	0.708	0.00124565	6.74585e-53	0.661575	0.941	0.721	1.8887e-48	4.44908e-08	1.34917e-52	15
Rps29	4.24299e-06	0.439154	1	1	0.118795	8.85714e-53	0.3324	1	1	2.47982e-48	4.24299e-06	1.77143e-52	15
Tuba1b	2.01199e-05	0.533824	1	0.945	0.563316	1.65235e-52	0.689813	1	0.953	4.62626e-48	2.01199e-05	3.3047e-52	15
Lyar	4.2955e-08	0.886988	1	0.613	0.00120266	1.68287e-52	0.885065	0.882	0.649	4.7117e-48	4.2955e-08	3.36574e-52	15
Pola1	6.55118e-11	0.251142	0.583	0.079	1.8342e-06	2.78025e-52	0.259084	0.426	0.093	7.78414e-48	6.55118e-11	5.5605e-52	15
Nme1	4.6098e-06	0.871626	1	0.847	0.129065	6.17215e-52	0.737037	0.982	0.915	1.72808e-47	4.6098e-06	1.23443e-51	15
Ezh2	8.59657e-07	0.440309	0.917	0.377	0.0240687	1.02334e-51	0.553897	0.822	0.397	2.86514e-47	8.59657e-07	2.04667e-51	15
Gm8730	0.000240859	0.634048	0.917	0.756	1	1.08398e-51	0.595712	0.97	0.787	3.03494e-47	0.000240859	2.16797e-51	15
Nolc1	5.86491e-07	0.834019	0.917	0.482	0.0164206	1.83786e-51	0.795949	0.846	0.517	5.14563e-47	5.86491e-07	3.67571e-51	15
Parp1	6.23892e-08	0.565949	0.917	0.326	0.00174677	1.85199e-50	0.490045	0.775	0.353	5.18521e-46	6.23892e-08	3.70398e-50	15
Paics	1.80618e-05	0.426966	1	0.585	0.505695	1.85229e-50	0.546314	0.947	0.604	5.18603e-46	1.80618e-05	3.70457e-50	15
Slc1a5	1.81527e-05	0.282216	0.667	0.202	0.50824	2.35289e-50	0.355561	0.657	0.222	6.58763e-46	1.81527e-05	4.70579e-50	15
Fam96a	0.00394694	0.430321	1	0.708	1	5.86738e-50	0.611435	0.929	0.728	1.64275e-45	0.00394694	1.17348e-49	15
Nudt21	0.000171636	0.571875	1	0.7	1	6.58331e-50	0.596362	0.959	0.733	1.8432e-45	0.000171636	1.31666e-49	15
Isg20	2.268e-08	0.294073	0.667	0.127	0.000634994	7.5854e-50	0.673046	0.515	0.148	2.12376e-45	2.268e-08	1.51708e-49	15
Lsm3	0.0036604	0.32245	0.833	0.55	1	8.08604e-50	0.6189	0.911	0.591	2.26393e-45	0.0036604	1.61721e-49	15
Ddx39	0.0338529	0.671758	0.75	0.476	1	1.25199e-49	0.734717	0.87	0.519	3.50532e-45	0.0338529	2.50398e-49	15
Mrpl52	3.6037e-08	0.830157	1	0.877	0.00100896	2.83436e-49	0.680031	0.935	0.886	7.93565e-45	3.6037e-08	5.66873e-49	15
Snrpd2	7.31518e-05	0.529799	1	0.935	1	3.71175e-49	0.557802	0.988	0.94	1.03922e-44	7.31518e-05	7.4235e-49	15
Vars	2.81519e-09	0.683972	0.917	0.318	7.88197e-05	4.65497e-48	0.547281	0.74	0.338	1.3033e-43	2.81519e-09	9.30994e-48	15
Blvrb	2.74521e-07	0.65723	1	0.726	0.00768604	7.51457e-48	1.46456	0.905	0.679	2.10393e-43	2.74521e-07	1.50291e-47	15
U2af1	0.0618875	0.469447	1	0.863	1	1.3747e-47	0.599722	0.976	0.861	3.84888e-43	0.0618875	2.7494e-47	15
Ppat	9.77224e-05	0.601063	0.5	0.141	1	2.5956e-47	0.320317	0.544	0.157	7.26716e-43	9.77224e-05	5.1912e-47	15
Rpl34	9.04655e-09	0.510875	1	1	0.000253285	1.03434e-46	0.297181	1	1	2.89595e-42	9.04655e-09	2.06868e-46	15
Exosc8	1.95394e-05	0.478529	0.917	0.429	0.547064	2.04269e-46	0.522005	0.834	0.458	5.71913e-42	1.95394e-05	4.08539e-46	15
Gm10073	7.75353e-06	0.640196	0.917	0.729	0.217083	2.26127e-46	0.549907	0.941	0.715	6.33111e-42	7.75353e-06	4.52254e-46	15
Bola1	0.0250294	0.384341	0.667	0.442	1	2.92031e-46	0.515232	0.852	0.462	8.17628e-42	0.0250294	5.84062e-46	15
Mif	1.13154e-07	1.06517	1	0.902	0.0031681	3.53183e-46	0.861225	0.97	0.94	9.8884e-42	1.13154e-07	7.06365e-46	15
Polr3h	2.73922e-07	0.36495	0.833	0.25	0.00766927	3.89428e-46	0.389665	0.698	0.275	1.09032e-41	2.73922e-07	7.78857e-46	15
Ppm1g	0.0086433	0.30393	0.833	0.677	1	5.381e-46	0.594482	0.917	0.712	1.50657e-41	0.0086433	1.0762e-45	15
1190007I07Rik	8.11689e-07	0.389968	0.833	0.257	0.0227257	2.02363e-45	0.386357	0.663	0.248	5.66575e-41	8.11689e-07	4.04725e-45	15
Hells	2.21252e-10	0.58081	0.833	0.185	6.1946e-06	2.4351e-45	0.429523	0.621	0.219	6.81778e-41	2.21252e-10	4.87019e-45	15
Nucks1	0.000175269	0.404267	1	0.722	1	4.74633e-45	0.521711	0.959	0.774	1.32888e-40	0.000175269	9.49267e-45	15
Creg1	2.32206e-08	1.11417	1	0.517	0.000650129	8.80119e-45	0.618151	0.84	0.504	2.46416e-40	2.32206e-08	1.76024e-44	15
Hist1h4i	8.80227e-07	0.410703	0.667	0.188	0.0246446	1.3759e-44	0.941473	0.722	0.285	3.85226e-40	8.80227e-07	2.75181e-44	15
Pfdn6	8.16356e-06	0.54034	1	0.691	0.228563	2.1878e-44	0.568301	0.917	0.697	6.12541e-40	8.16356e-06	4.37561e-44	15
Prim1	4.46103e-05	0.278432	0.5	0.129	1	2.19052e-44	0.284191	0.521	0.144	6.13302e-40	4.46103e-05	4.38104e-44	15
Atad2	4.0808e-05	0.296293	0.583	0.171	1	2.94655e-44	0.404003	0.592	0.197	8.24975e-40	4.0808e-05	5.8931e-44	15
Bola2	7.32667e-06	0.699769	0.917	0.803	0.205132	3.84938e-44	0.557771	0.97	0.836	1.07775e-39	7.32667e-06	7.69875e-44	15
Mrpl12	0.00363354	0.318707	1	0.783	1	6.86355e-44	0.706381	0.959	0.807	1.92166e-39	0.00363354	1.37271e-43	15
Ssbp2	0.000440837	0.372831	0.583	0.221	1	9.78411e-44	0.357844	0.675	0.258	2.73936e-39	0.000440837	1.95682e-43	15
Larp1	1.46042e-06	0.394776	1	0.414	0.0408889	1.79606e-43	0.50482	0.805	0.479	5.02862e-39	1.46042e-06	3.59213e-43	15
Eef1a1	1.66795e-05	0.350668	1	1	0.466994	3.48011e-43	0.350658	1	1	9.74361e-39	1.66795e-05	6.96022e-43	15
Cenpq	2.70663e-07	0.299015	0.667	0.149	0.00757802	8.07293e-43	0.253263	0.568	0.178	2.26026e-38	2.70663e-07	1.61459e-42	15
Selenbp1	1.76995e-09	0.295013	0.583	0.091	4.95551e-05	1.03085e-42	0.278518	0.432	0.112	2.88618e-38	1.76995e-09	2.0617e-42	15
Carnmt1	4.62704e-07	0.498734	1	0.386	0.0129548	1.09012e-42	0.451616	0.811	0.42	3.05212e-38	4.62704e-07	2.18024e-42	15
Prdx3	5.2974e-06	0.552127	1	0.667	0.148317	1.09198e-42	0.752512	0.911	0.66	3.05732e-38	5.2974e-06	2.18396e-42	15
Cdk4	4.15498e-07	0.669059	1	0.845	0.0116331	1.78533e-42	0.50272	0.923	0.873	4.99856e-38	4.15498e-07	3.57065e-42	15
Pno1	1.07504e-05	0.386645	0.833	0.287	0.30099	1.94184e-42	0.367491	0.728	0.317	5.43678e-38	1.07504e-05	3.88369e-42	15
Sfxn1	0.01998	0.273537	0.75	0.468	1	2.26729e-42	0.615728	0.811	0.508	6.34796e-38	0.01998	4.53458e-42	15
Mettl1	1.38066e-09	0.477137	0.917	0.234	3.86557e-05	6.04618e-42	0.369343	0.627	0.234	1.69281e-37	1.38066e-09	1.20924e-41	15
Bri3bp	6.36486e-15	0.540818	0.75	0.107	1.78203e-10	6.80649e-42	0.379921	0.444	0.126	1.90568e-37	6.36486e-15	1.3613e-41	15
Nifk	6.85911e-06	0.428166	0.917	0.425	0.192041	7.16697e-42	0.517144	0.805	0.462	2.00661e-37	6.85911e-06	1.43339e-41	15
Sms	5.16064e-15	0.82198	1	0.23	1.44488e-10	8.54683e-42	0.452552	0.675	0.296	2.39294e-37	5.16064e-15	1.70937e-41	15
Bcas2	0.0100006	0.389353	1	0.771	1	1.43545e-41	0.559891	0.953	0.796	4.01897e-37	0.0100006	2.8709e-41	15
Park7	8.58926e-06	0.470943	1	0.943	0.240482	1.44167e-41	0.425791	0.976	0.947	4.03638e-37	8.58926e-06	2.88334e-41	15
Gclm	0.132453	0.349261	0.833	0.665	1	9.02763e-41	0.599591	0.929	0.679	2.52756e-36	0.132453	1.80553e-40	15
Sf3b6	9.6001e-07	0.737292	1	0.82	0.0268784	1.75017e-40	0.548763	0.941	0.842	4.90013e-36	9.6001e-07	3.50034e-40	15
Rad50	5.37577e-08	0.370305	0.833	0.227	0.00150511	2.18233e-40	0.326518	0.615	0.231	6.11008e-36	5.37577e-08	4.36465e-40	15
Rps14	1.70029e-05	0.367577	1	1	0.476047	2.79062e-40	0.25062	1	1	7.81318e-36	1.70029e-05	5.58124e-40	15
Snhg9	0.00140036	0.347385	0.667	0.332	1	5.27703e-40	0.580028	0.751	0.406	1.47746e-35	0.00140036	1.05541e-39	15
Vamp5	1.50668e-08	0.976197	1	0.769	0.00042184	9.16524e-40	0.797161	0.893	0.754	2.56608e-35	1.50668e-08	1.83305e-39	15
Ipo5	6.36333e-06	0.644281	0.917	0.373	0.178161	1.31597e-39	0.404488	0.769	0.394	3.68445e-35	6.36333e-06	2.63194e-39	15
Mcm6	0.000229092	0.53891	0.917	0.582	1	1.3817e-39	0.533542	0.888	0.528	3.86847e-35	0.000229092	2.76339e-39	15
Rfc2	0.00226971	0.377028	0.833	0.554	1	1.53162e-39	0.467992	0.893	0.572	4.28823e-35	0.00226971	3.06324e-39	15
Apobec3	0.00328649	0.428055	0.667	0.342	1	1.82771e-39	0.501449	0.751	0.361	5.11721e-35	0.00328649	3.65541e-39	15
Gspt1	0.000211522	0.652299	1	0.653	1	1.92284e-39	0.426369	0.917	0.677	5.38355e-35	0.000211522	3.84567e-39	15
Noc2l	3.7098e-05	0.358947	0.667	0.236	1	2.31401e-39	0.413877	0.657	0.278	6.47877e-35	3.7098e-05	4.62802e-39	15
Cdk6	4.43829e-11	1.26035	1	0.4	1.24263e-06	3.69019e-39	0.880215	0.716	0.398	1.03318e-34	4.43829e-11	7.38039e-39	15
Ddx27	1.30919e-08	0.601106	1	0.385	0.000366547	4.62933e-39	0.544851	0.716	0.391	1.29612e-34	1.30919e-08	9.25866e-39	15
Nadk2	1.93616e-14	0.767385	0.917	0.186	5.42086e-10	6.00908e-39	0.320236	0.544	0.186	1.68242e-34	1.93616e-14	1.20182e-38	15
E2f1	1.75739e-11	0.671812	0.833	0.163	4.92035e-07	8.06391e-39	0.292825	0.544	0.176	2.25773e-34	1.75739e-11	1.61278e-38	15
Ube2c	2.57041e-08	0.332768	0.917	0.222	0.000719663	1.41846e-38	0.641927	0.716	0.281	3.97142e-34	2.57041e-08	2.83693e-38	15
Naca	8.36725e-09	0.587148	1	0.999	0.000234266	1.80949e-38	0.341908	1	0.999	5.06622e-34	8.36725e-09	3.61899e-38	15
Exosc2	0.604357	0.282444	0.25	0.243	1	2.23401e-38	0.37174	0.663	0.279	6.25478e-34	0.604357	4.46802e-38	15
Tkt	2.20727e-09	0.993135	1	0.636	6.1799e-05	2.95705e-38	0.641731	0.87	0.673	8.27915e-34	2.20727e-09	5.9141e-38	15
Psat1	6.2434e-12	0.757204	0.917	0.232	1.74803e-07	3.28393e-38	0.471943	0.604	0.253	9.19435e-34	6.2434e-12	6.56786e-38	15
Ndufab1	0.0578698	0.287547	0.917	0.885	1	4.79589e-38	0.396588	0.994	0.901	1.34275e-33	0.0578698	9.59177e-38	15
Cluh	6.69965e-10	0.315826	0.75	0.142	1.87577e-05	5.6069e-38	0.257426	0.485	0.15	1.56982e-33	6.69965e-10	1.12138e-37	15
Rsl1d1	0.0170031	0.371245	0.833	0.605	1	6.83088e-38	0.562371	0.87	0.646	1.91251e-33	0.0170031	1.36618e-37	15
Snrpd3	0.00663266	0.34101	0.833	0.763	1	1.06365e-37	0.562667	0.959	0.788	2.978e-33	0.00663266	2.1273e-37	15
Epor	1.51842e-11	0.957226	0.917	0.261	4.25126e-07	1.07354e-37	0.380831	0.509	0.176	3.0057e-33	1.51842e-11	2.14708e-37	15
Srsf6	0.010996	0.381156	1	0.755	1	1.12142e-37	0.578262	0.935	0.761	3.13975e-33	0.010996	2.24284e-37	15
Lsm5	8.15722e-05	0.481243	0.917	0.748	1	1.18371e-37	0.468757	0.941	0.773	3.31416e-33	8.15722e-05	2.36743e-37	15
Wdr76	2.38453e-06	0.30612	0.583	0.134	0.0667622	1.22906e-37	0.280554	0.485	0.144	3.44114e-33	2.38453e-06	2.45813e-37	15
Ubac1	0.00543232	0.484193	0.667	0.458	1	1.2693e-37	0.771564	0.811	0.46	3.55378e-33	0.00543232	2.53859e-37	15
Wdr12	2.15232e-05	0.617384	0.75	0.297	0.602607	1.49843e-37	0.339792	0.716	0.337	4.1953e-33	2.15232e-05	2.99686e-37	15
Ngfrap1	0.000539229	0.403242	1	0.577	1	1.74652e-37	0.462306	0.911	0.601	4.88992e-33	0.000539229	3.49305e-37	15
Ccne2	8.01625e-09	0.273553	0.667	0.121	0.000224439	1.78982e-37	0.266039	0.426	0.117	5.01113e-33	8.01625e-09	3.57963e-37	15
Asns	8.80302e-12	1.10423	1	0.253	2.46467e-07	2.05988e-37	0.525253	0.651	0.278	5.76726e-33	8.80302e-12	4.11977e-37	15
Pdap1	9.27272e-05	0.507754	1	0.914	1	2.7179e-37	0.453493	0.97	0.93	7.60959e-33	9.27272e-05	5.43581e-37	15
Phf5a	0.00168463	0.368357	1	0.79	1	4.27134e-37	0.51281	0.941	0.787	1.19589e-32	0.00168463	8.54267e-37	15
Rps27	0.00123441	0.399727	1	1	1	6.66036e-37	0.293594	1	1	1.86477e-32	0.00123441	1.33207e-36	15
Wdr74	1.57821e-08	0.623409	0.917	0.326	0.000441867	7.02853e-37	0.435755	0.692	0.345	1.96785e-32	1.57821e-08	1.40571e-36	15
Tm7sf3	0.0499651	0.278096	0.417	0.225	1	1.18988e-36	0.26924	0.586	0.212	3.33142e-32	0.0499651	2.37976e-36	15
Fam136a	5.03277e-07	0.433818	0.917	0.35	0.0140907	1.21275e-36	0.525574	0.686	0.358	3.39546e-32	5.03277e-07	2.4255e-36	15
Bzw2	4.20151e-05	0.891748	0.833	0.424	1	1.47058e-36	0.40351	0.811	0.435	4.11734e-32	4.20151e-05	2.94116e-36	15
Cox17	4.45394e-07	0.561493	1	0.721	0.0124701	1.74411e-36	0.520079	0.911	0.741	4.88315e-32	4.45394e-07	3.48821e-36	15
Nudt5	1.33239e-05	0.75848	0.917	0.482	0.373041	2.48609e-36	0.381515	0.858	0.522	6.96056e-32	1.33239e-05	4.97218e-36	15
Rpl27	0.000165746	0.381532	1	0.987	1	3.04493e-36	0.346847	0.988	0.992	8.5252e-32	0.000165746	6.08986e-36	15
Cnbp	0.130853	0.362873	1	0.964	1	1.16686e-35	0.398342	0.994	0.965	3.26697e-31	0.130853	2.33372e-35	15
Tomm20	0.000755083	0.552759	1	0.955	1	1.48989e-35	0.55238	0.964	0.966	4.1714e-31	0.000755083	2.97979e-35	15
Gtf3a	0.00189815	0.453577	0.75	0.457	1	2.01812e-35	0.436314	0.775	0.481	5.65033e-31	0.00189815	4.03624e-35	15
Gpatch4	3.52079e-07	0.50784	0.917	0.299	0.00985751	2.25636e-35	0.456304	0.698	0.341	6.31736e-31	3.52079e-07	4.51272e-35	15
Pdk3	0.0208388	0.269259	0.417	0.198	1	2.51992e-35	0.26431	0.533	0.188	7.05527e-31	0.0208388	5.03984e-35	15
Pebp1	0.000220181	0.68281	1	0.93	1	3.25869e-35	0.569514	0.959	0.935	9.12367e-31	0.000220181	6.51737e-35	15
Gtf2a2	3.95806e-06	0.530975	1	0.804	0.110818	3.68469e-35	0.5333	0.941	0.828	1.03164e-30	3.95806e-06	7.36938e-35	15
Ccnb2	0.092868	0.480522	0.333	0.189	1	1.04723e-34	0.437264	0.633	0.241	2.93203e-30	0.092868	2.09446e-34	15
Eif1ax	0.002238	0.41988	1	0.734	1	1.06854e-34	0.453015	0.905	0.755	2.9917e-30	0.002238	2.13708e-34	15
Mrto4	7.00012e-08	0.736739	1	0.427	0.00195989	1.07043e-34	0.513183	0.763	0.477	2.99698e-30	7.00012e-08	2.14085e-34	15
Epb41l4aos	0.0028039	0.376358	0.667	0.369	1	1.2177e-34	0.398286	0.71	0.357	3.40933e-30	0.0028039	2.43541e-34	15
Psme3	0.0728135	0.534133	0.75	0.527	1	1.49116e-34	0.452804	0.834	0.545	4.17495e-30	0.0728135	2.98232e-34	15
Cox7b	2.51094e-06	0.563678	1	0.937	0.0703012	2.11174e-34	0.419094	0.988	0.95	5.91244e-30	2.51094e-06	4.22347e-34	15
Rif1	9.07604e-08	0.463436	0.917	0.26	0.00254111	2.15704e-34	0.351868	0.604	0.253	6.03929e-30	9.07604e-08	4.31409e-34	15
Snx5	2.6952e-05	0.397967	1	0.646	0.754602	2.39918e-34	0.530657	0.846	0.618	6.71721e-30	2.6952e-05	4.79835e-34	15
Rbmxl1	1.90441e-05	0.455946	1	0.669	0.533197	2.47192e-34	0.534086	0.893	0.681	6.92088e-30	1.90441e-05	4.94384e-34	15
Vrk1	5.10616e-13	0.69955	1	0.238	1.42962e-08	2.80072e-34	0.404045	0.598	0.255	7.84147e-30	5.10616e-13	5.60145e-34	15
Mrps36	6.34812e-08	0.755009	1	0.626	0.00177735	3.03986e-34	0.483265	0.882	0.645	8.51101e-30	6.34812e-08	6.07973e-34	15
Lsm2	1.17099e-06	0.633406	1	0.733	0.0327853	5.05094e-34	0.489217	0.947	0.781	1.41416e-29	1.17099e-06	1.01019e-33	15
Mbnl1	6.7874e-05	0.460066	1	0.634	1	5.84468e-34	0.517436	0.935	0.714	1.63639e-29	6.7874e-05	1.16894e-33	15
Gemin6	2.24532e-06	0.393881	0.667	0.189	0.0628645	6.31438e-34	0.28947	0.544	0.209	1.7679e-29	2.24532e-06	1.26288e-33	15
Exosc3	0.0537338	0.421348	0.5	0.366	1	7.76503e-34	0.351217	0.769	0.404	2.17405e-29	0.0537338	1.55301e-33	15
Atf1	1.16847e-05	0.363367	0.917	0.352	0.327149	9.47799e-34	0.384966	0.746	0.376	2.65365e-29	1.16847e-05	1.8956e-33	15
Sephs2	2.39404e-05	0.615743	0.833	0.386	0.670283	1.3941e-33	0.449771	0.71	0.381	3.9032e-29	2.39404e-05	2.7882e-33	15
Ppp2r1b	2.2751e-15	0.714229	1	0.196	6.36984e-11	1.7751e-33	0.33644	0.538	0.207	4.96992e-29	2.2751e-15	3.5502e-33	15
Ddx46	2.58632e-05	0.628053	0.917	0.592	0.724118	2.48603e-33	0.523519	0.84	0.611	6.96039e-29	2.58632e-05	4.97206e-33	15
Pdcd11	4.76209e-07	0.584529	0.917	0.401	0.0133329	2.7707e-33	0.451282	0.698	0.392	7.7574e-29	4.76209e-07	5.5414e-33	15
Eif2s1	0.0219124	0.348721	0.917	0.676	1	3.60575e-33	0.487221	0.923	0.705	1.00954e-28	0.0219124	7.2115e-33	15
Plekhj1	0.00154029	0.267055	1	0.599	1	3.91705e-33	0.444987	0.852	0.617	1.0967e-28	0.00154029	7.83411e-33	15
Smc4	0.0281939	0.27777	0.75	0.535	1	5.4313e-33	0.517911	0.905	0.579	1.52065e-28	0.0281939	1.08626e-32	15
Mybbp1a	5.44404e-08	0.573881	0.917	0.341	0.00152422	5.45828e-33	0.428821	0.716	0.396	1.52821e-28	5.44404e-08	1.09166e-32	15
Mrpl20	0.0112766	0.278797	1	0.885	1	1.1436e-32	0.42257	0.953	0.91	3.20186e-28	0.0112766	2.28721e-32	15
Tmpo	1.4939e-06	0.541863	1	0.583	0.0418262	1.89458e-32	0.468038	0.876	0.596	5.30446e-28	1.4939e-06	3.78917e-32	15
Ppil1	1.75874e-05	0.322027	1	0.432	0.492413	3.28183e-32	0.393158	0.775	0.461	9.18848e-28	1.75874e-05	6.56367e-32	15
Topbp1	6.558e-06	0.513766	0.75	0.245	0.183611	3.34128e-32	0.334788	0.651	0.307	9.35491e-28	6.558e-06	6.68256e-32	15
Pfas	5.40263e-14	0.737972	0.917	0.185	1.51263e-09	3.74426e-32	0.366762	0.509	0.186	1.04832e-27	5.40263e-14	7.48853e-32	15
Wdr89	0.0164606	0.329025	0.917	0.708	1	4.23701e-32	0.412067	0.935	0.747	1.18628e-27	0.0164606	8.47402e-32	15
Mrps26	0.00628858	0.262841	0.917	0.603	1	4.56541e-32	0.49189	0.834	0.6	1.27822e-27	0.00628858	9.13083e-32	15
Eif4b	6.44257e-05	0.414758	1	0.706	1	4.95275e-32	0.446573	0.882	0.678	1.38667e-27	6.44257e-05	9.90549e-32	15
Lsm4	2.57887e-06	0.56732	1	0.889	0.0722031	7.7301e-32	0.364935	1	0.91	2.16427e-27	2.57887e-06	1.54602e-31	15
Gsto1	4.7083e-07	0.526544	0.833	0.236	0.0131823	8.74331e-32	0.479963	0.663	0.345	2.44795e-27	4.7083e-07	1.74866e-31	15
Dpy30	3.73272e-05	0.446275	1	0.738	1	9.85879e-32	0.463547	0.917	0.75	2.76026e-27	3.73272e-05	1.97176e-31	15
Atp5k	0.000504187	0.317156	1	0.967	1	1.64957e-31	0.373764	0.988	0.958	4.61848e-27	0.000504187	3.29915e-31	15
Mrpl30	0.00612228	0.28275	0.917	0.856	1	1.89152e-31	0.388369	0.935	0.867	5.29587e-27	0.00612228	3.78303e-31	15
Rpl15	5.25018e-05	0.435096	1	0.979	1	2.01917e-31	0.32719	1	0.987	5.65326e-27	5.25018e-05	4.03833e-31	15
Uck2	1.25018e-08	0.355817	0.833	0.211	0.000350027	2.21212e-31	0.350359	0.586	0.251	6.1935e-27	1.25018e-08	4.42424e-31	15
Cox7c	4.81992e-08	0.476377	1	0.996	0.00134948	2.97199e-31	0.288411	1	0.997	8.32097e-27	4.81992e-08	5.94397e-31	15
Tcp1	1.98274e-05	0.691328	1	0.825	0.555128	3.01506e-31	0.511608	0.899	0.843	8.44156e-27	1.98274e-05	6.03011e-31	15
Dkc1	5.08574e-06	0.734215	0.833	0.329	0.142391	3.08437e-31	0.420276	0.645	0.325	8.63563e-27	5.08574e-06	6.16875e-31	15
Ddx18	0.0119939	0.301376	0.917	0.591	1	4.58779e-31	0.437136	0.811	0.584	1.28449e-26	0.0119939	9.17559e-31	15
Eif3a	4.3377e-06	0.598884	1	0.861	0.121447	5.57742e-31	0.466729	0.947	0.889	1.56157e-26	4.3377e-06	1.11548e-30	15
Epdr1	0.0945683	0.35366	0.333	0.2	1	6.76356e-31	0.330676	0.574	0.233	1.89366e-26	0.0945683	1.35271e-30	15
Vamp8	0.08824	0.353099	0.917	0.861	1	7.67747e-31	0.441698	0.964	0.894	2.14954e-26	0.08824	1.53549e-30	15
Tcof1	0.000885182	0.251903	0.75	0.314	1	7.73994e-31	0.382479	0.669	0.342	2.16703e-26	0.000885182	1.54799e-30	15
Srsf1	0.000248235	0.50662	0.917	0.703	1	9.90809e-31	0.519952	0.882	0.706	2.77407e-26	0.000248235	1.98162e-30	15
Timm10	1.12973e-05	0.697654	0.917	0.426	0.316303	1.15099e-30	0.406379	0.757	0.465	3.22253e-26	1.12973e-05	2.30197e-30	15
Hspa9	0.000936785	0.802478	0.917	0.662	1	1.2086e-30	0.552659	0.87	0.701	3.38385e-26	0.000936785	2.41721e-30	15
Zfos1	0.0178078	0.919943	0.667	0.811	1	1.29436e-30	0.647334	0.935	0.824	3.62394e-26	0.0178078	2.58872e-30	15
Cox8a	1.42397e-05	0.589526	1	0.997	0.398682	1.43065e-30	0.321397	1	0.997	4.00553e-26	1.42397e-05	2.8613e-30	15
Mrps28	0.0518333	0.31355	0.75	0.569	1	2.08558e-30	0.455114	0.84	0.604	5.8392e-26	0.0518333	4.17116e-30	15
Wdr43	2.76479e-07	0.519771	1	0.485	0.00774087	2.27675e-30	0.49914	0.746	0.499	6.37443e-26	2.76479e-07	4.55349e-30	15
Alkbh1	0.00110258	0.406415	0.667	0.311	1	3.97999e-30	0.379548	0.698	0.364	1.11432e-25	0.00110258	7.95998e-30	15
Uqcr11	1.43613e-06	0.508173	1	0.987	0.0402088	6.10388e-30	0.395309	0.994	0.985	1.70896e-25	1.43613e-06	1.22078e-29	15
Rpf2	0.0243463	0.259267	0.5	0.255	1	7.1941e-30	0.269835	0.615	0.266	2.01421e-25	0.0243463	1.43882e-29	15
Mrpl23	2.6276e-06	0.566933	1	0.755	0.0735676	7.95019e-30	0.452353	0.917	0.766	2.22589e-25	2.6276e-06	1.59004e-29	15
Sf3b5	0.000571592	0.35673	1	0.83	1	8.18106e-30	0.442333	0.923	0.847	2.29053e-25	0.000571592	1.63621e-29	15
Sssca1	7.21227e-06	0.456854	1	0.471	0.201929	1.26316e-29	0.482382	0.751	0.487	3.53659e-25	7.21227e-06	2.52632e-29	15
Rnps1	0.00093589	0.411946	0.833	0.68	1	1.29343e-29	0.47173	0.876	0.711	3.62135e-25	0.00093589	2.58686e-29	15
Arrb1	7.19548e-22	0.834807	1	0.143	2.01459e-17	1.37088e-29	0.337062	0.503	0.195	3.83819e-25	7.19548e-22	2.74176e-29	15
Tomm22	5.03844e-06	0.566275	1	0.925	0.141066	1.45024e-29	0.383663	0.988	0.926	4.06039e-25	5.03844e-06	2.90048e-29	15
Ssrp1	0.125476	0.371572	0.917	0.727	1	1.52823e-29	0.449345	0.917	0.74	4.27874e-25	0.125476	3.05646e-29	15
Naa10	7.64113e-05	0.444113	0.917	0.561	1	1.7413e-29	0.455829	0.822	0.582	4.8753e-25	7.64113e-05	3.48261e-29	15
Mat2a	0.000186985	0.679506	1	0.828	1	2.00792e-29	0.438464	0.959	0.857	5.62177e-25	0.000186985	4.01583e-29	15
Wdr46	0.0576468	0.323215	0.333	0.177	1	2.36627e-29	0.252559	0.497	0.183	6.62507e-25	0.0576468	4.73253e-29	15
Ppa1	0.00696321	0.495331	0.75	0.424	1	2.95833e-29	0.389155	0.757	0.452	8.28272e-25	0.00696321	5.91665e-29	15
Tomm40	3.51806e-06	0.723759	1	0.679	0.0984987	3.33823e-29	0.575394	0.84	0.684	9.34637e-25	3.51806e-06	6.67646e-29	15
Got2	5.32681e-05	0.541805	0.833	0.516	1	4.21117e-29	0.366502	0.799	0.508	1.17904e-24	5.32681e-05	8.42234e-29	15
Tmem97	8.64897e-08	0.769546	0.75	0.194	0.00242154	9.47002e-29	0.306851	0.533	0.215	2.65142e-24	8.64897e-08	1.894e-28	15
Rnf187	0.00421698	0.266014	1	0.78	1	1.01457e-28	0.495735	0.899	0.769	2.84058e-24	0.00421698	2.02913e-28	15
Slc25a5	7.95245e-08	0.734962	1	0.992	0.00222653	1.01773e-28	0.384305	0.976	0.993	2.84945e-24	7.95245e-08	2.03547e-28	15
Pbdc1	0.00123947	0.410339	0.75	0.426	1	1.20387e-28	0.389146	0.775	0.474	3.37059e-24	0.00123947	2.40773e-28	15
Ybx1	7.43815e-09	0.707188	1	0.997	0.000208253	1.67581e-28	0.354019	0.97	0.999	4.69193e-24	7.43815e-09	3.35162e-28	15
Mrpl35	0.00482702	0.258906	0.917	0.562	1	2.14434e-28	0.427269	0.828	0.591	6.00373e-24	0.00482702	4.28868e-28	15
Smarca5	3.21165e-05	0.507556	1	0.622	0.899199	5.25937e-28	0.405311	0.917	0.656	1.47252e-23	3.21165e-05	1.05187e-27	15
Gps2	7.34297e-06	0.453937	1	0.517	0.205588	5.41099e-28	0.377093	0.834	0.54	1.51497e-23	7.34297e-06	1.0822e-27	15
Polr1d	0.00195802	0.309268	1	0.939	1	7.52087e-28	0.40977	0.976	0.95	2.10569e-23	0.00195802	1.50417e-27	15
Idh3a	0.0207538	0.253605	0.833	0.489	1	7.85132e-28	0.350375	0.811	0.497	2.19821e-23	0.0207538	1.57026e-27	15
Eif5b	0.3112	0.406491	1	0.918	1	9.05647e-28	0.356584	0.97	0.93	2.53563e-23	0.3112	1.81129e-27	15
Dnajc19	3.08841e-08	0.723416	1	0.698	0.000864693	1.00414e-27	0.418875	0.84	0.703	2.81139e-23	3.08841e-08	2.00828e-27	15
Polr2f	5.1004e-07	0.584266	1	0.84	0.0142801	1.26089e-27	0.498508	0.917	0.861	3.53023e-23	5.1004e-07	2.52178e-27	15
Lsm6	0.00267297	0.322034	0.917	0.778	1	1.73521e-27	0.38418	0.964	0.8	4.85825e-23	0.00267297	3.47042e-27	15
Ndufaf4	8.97773e-05	0.351491	1	0.539	1	2.23564e-27	0.409197	0.817	0.558	6.25936e-23	8.97773e-05	4.47129e-27	15
Fbl	1.74429e-05	0.603858	1	0.677	0.488367	2.83736e-27	0.45143	0.864	0.707	7.94405e-23	1.74429e-05	5.67472e-27	15
Amd1	0.00116102	0.331785	0.833	0.449	1	2.94015e-27	0.276214	0.775	0.431	8.23184e-23	0.00116102	5.8803e-27	15
Mrps16	1.40912e-05	0.557649	1	0.71	0.394525	8.38903e-27	0.39515	0.905	0.733	2.34876e-22	1.40912e-05	1.67781e-26	15
Baz1a	0.164131	0.260906	0.5	0.387	1	8.81298e-27	0.379788	0.751	0.463	2.46746e-22	0.164131	1.7626e-26	15
Txnl4a	1.42009e-05	0.455971	1	0.501	0.397595	1.10613e-26	0.413972	0.769	0.527	3.09696e-22	1.42009e-05	2.21227e-26	15
Polr2l	0.00705733	0.329862	0.75	0.542	1	1.13465e-26	0.470712	0.763	0.507	3.17678e-22	0.00705733	2.26929e-26	15
Llph	0.0023857	0.327681	0.833	0.737	1	1.39147e-26	0.509118	0.834	0.787	3.89583e-22	0.0023857	2.78293e-26	15
Chchd4	0.00183797	0.715792	0.667	0.386	1	2.71305e-26	0.489009	0.645	0.403	7.596e-22	0.00183797	5.4261e-26	15
Ssbp1	0.0294019	0.557308	0.833	0.6	1	2.77041e-26	0.377872	0.822	0.615	7.75661e-22	0.0294019	5.54083e-26	15
Cdc20	0.000195219	0.668465	0.583	0.194	1	2.91307e-26	0.272626	0.592	0.244	8.15601e-22	0.000195219	5.82614e-26	15
Ccdc34	3.18236e-05	0.55987	1	0.507	0.890997	4.19454e-26	0.417462	0.846	0.536	1.17439e-21	3.18236e-05	8.38908e-26	15
Nusap1	4.93547e-06	0.396256	0.667	0.169	0.138183	4.21313e-26	0.374506	0.544	0.21	1.17959e-21	4.93547e-06	8.42626e-26	15
Mak16	2.87022e-07	0.588544	1	0.426	0.00803604	7.99406e-26	0.346505	0.757	0.485	2.23818e-21	2.87022e-07	1.59881e-25	15
Nt5c3	0.00266803	0.618117	0.75	0.374	1	8.4997e-26	0.379974	0.716	0.44	2.37975e-21	0.00266803	1.69994e-25	15
Khsrp	2.59941e-08	0.631562	0.833	0.258	0.000727782	9.12414e-26	0.30275	0.598	0.281	2.55458e-21	2.59941e-08	1.82483e-25	15
Rcc1	0.110258	0.491746	0.333	0.205	1	9.25032e-26	0.329659	0.556	0.26	2.5899e-21	0.110258	1.85006e-25	15
Anapc15	1.08206e-05	0.458971	0.833	0.327	0.302956	1.03332e-25	0.317338	0.686	0.385	2.89309e-21	1.08206e-05	2.06664e-25	15
Gm16286	0.000138558	0.426279	0.917	0.716	1	1.2906e-25	0.383023	0.888	0.759	3.61341e-21	0.000138558	2.5812e-25	15
2700029M09Rik	0.0585283	0.287933	0.667	0.464	1	1.34879e-25	0.423684	0.787	0.482	3.77635e-21	0.0585283	2.69758e-25	15
Ppp2r4	0.00144113	0.374823	0.833	0.654	1	1.81754e-25	0.373476	0.846	0.652	5.08876e-21	0.00144113	3.63509e-25	15
Ebna1bp2	0.0040995	0.479411	1	0.691	1	1.85625e-25	0.428744	0.888	0.729	5.19712e-21	0.0040995	3.71249e-25	15
Ruvbl2	0.0545207	0.642979	0.583	0.456	1	1.97262e-25	0.330188	0.746	0.444	5.52293e-21	0.0545207	3.94523e-25	15
Cisd1	0.0513639	0.360944	0.75	0.741	1	3.61209e-25	0.382389	0.911	0.774	1.01131e-20	0.0513639	7.22417e-25	15
Atp13a3	0.000187713	0.296229	0.667	0.261	1	6.08371e-25	0.264441	0.686	0.362	1.70332e-20	0.000187713	1.21674e-24	15
Ybx3	1.6066e-06	0.684379	1	0.867	0.0449816	7.23605e-25	0.378139	0.935	0.903	2.02595e-20	1.6066e-06	1.44721e-24	15
Rrp9	0.000115045	0.447161	0.667	0.233	1	8.49788e-25	0.281736	0.568	0.264	2.37924e-20	0.000115045	1.69958e-24	15
Zfp593	5.90215e-06	0.308366	0.75	0.242	0.165248	1.21353e-24	0.266487	0.586	0.277	3.39763e-20	5.90215e-06	2.42705e-24	15
Eif3b	0.000758135	0.428869	0.917	0.693	1	1.72903e-24	0.429993	0.87	0.724	4.84094e-20	0.000758135	3.45806e-24	15
Mrpl57	0.0879546	0.336258	1	0.787	1	1.86192e-24	0.405489	0.959	0.821	5.213e-20	0.0879546	3.72383e-24	15
Psmg2	0.0585807	0.325135	0.583	0.36	1	1.92255e-24	0.288971	0.657	0.355	5.38275e-20	0.0585807	3.8451e-24	15
Rp9	0.000320226	0.499739	0.917	0.778	1	2.1042e-24	0.431	0.846	0.785	5.89135e-20	0.000320226	4.20841e-24	15
Uchl3	0.000636664	0.441088	0.833	0.444	1	2.98094e-24	0.375546	0.757	0.509	8.34603e-20	0.000636664	5.96188e-24	15
Alyref	0.000966374	0.304205	1	0.686	1	4.06768e-24	0.356927	0.899	0.74	1.13887e-19	0.000966374	8.13536e-24	15
Isy1	1.47415e-05	0.35836	0.833	0.31	0.412731	9.23572e-24	0.275974	0.604	0.31	2.58582e-19	1.47415e-05	1.84714e-23	15
Hacd1	0.0306642	0.481804	0.667	0.464	1	1.05612e-23	0.359261	0.751	0.516	2.95692e-19	0.0306642	2.11224e-23	15
Hnrnpd	0.000843863	0.707376	1	0.748	1	1.39206e-23	0.476281	0.852	0.743	3.89748e-19	0.000843863	2.78411e-23	15
Gfer	0.0055142	0.282604	0.75	0.441	1	1.7539e-23	0.351015	0.787	0.519	4.91058e-19	0.0055142	3.50781e-23	15
Cmc2	0.029345	0.263604	0.833	0.595	1	3.9058e-23	0.322647	0.864	0.608	1.09354e-18	0.029345	7.81159e-23	15
Thoc7	0.00855808	0.336532	0.917	0.722	1	8.35417e-23	0.365692	0.87	0.746	2.339e-18	0.00855808	1.67083e-22	15
Zfp36l2	0.00397792	0.349208	0.75	0.513	1	1.73658e-22	0.633791	0.704	0.514	4.86209e-18	0.00397792	3.47317e-22	15
Hypk	0.00393509	0.451372	0.75	0.594	1	1.91959e-22	0.353654	0.87	0.677	5.37446e-18	0.00393509	3.83917e-22	15
Apex1	2.84121e-05	0.634659	1	0.439	0.795483	1.99833e-22	0.307248	0.763	0.498	5.59492e-18	2.84121e-05	3.99665e-22	15
Rrp1b	0.00226532	0.641545	0.583	0.252	1	2.13317e-22	0.353923	0.533	0.257	5.97245e-18	0.00226532	4.26634e-22	15
Dnajc2	0.156388	0.643518	0.583	0.526	1	3.51273e-22	0.482917	0.769	0.595	9.83494e-18	0.156388	7.02546e-22	15
Slmo2	0.00817087	0.288091	0.917	0.538	1	3.84675e-22	0.367574	0.834	0.595	1.07701e-17	0.00817087	7.6935e-22	15
Tuba1c	0.00303206	0.354872	0.5	0.191	1	4.54518e-22	0.268814	0.639	0.317	1.27256e-17	0.00303206	9.09036e-22	15
Stom	2.69962e-12	0.441937	0.833	0.149	7.5584e-08	6.26882e-22	0.257797	0.426	0.161	1.75514e-17	2.69962e-12	1.25376e-21	15
Rangap1	0.00313625	0.389476	0.833	0.433	1	6.84951e-22	0.334533	0.746	0.463	1.91772e-17	0.00313625	1.3699e-21	15
Rpl23a-ps3	0.161492	0.271039	0.833	0.773	1	7.47699e-22	0.34361	0.917	0.776	2.09341e-17	0.161492	1.4954e-21	15
Ewsr1	0.000556932	0.430661	1	0.831	1	8.1127e-22	0.292111	0.953	0.84	2.27139e-17	0.000556932	1.62254e-21	15
H2afx	0.0580681	0.266938	0.667	0.56	1	9.48082e-22	0.589991	0.87	0.601	2.65444e-17	0.0580681	1.89616e-21	15
Cdc34	0.00123003	0.759402	0.667	0.483	1	1.73669e-21	0.35373	0.817	0.604	4.86239e-17	0.00123003	3.47338e-21	15
G3bp1	0.171965	0.713287	1	0.866	1	1.8019e-21	0.317698	0.935	0.877	5.04496e-17	0.171965	3.6038e-21	15
3110082I17Rik	1.94897e-06	0.39618	0.667	0.195	0.0545671	2.2467e-21	0.27903	0.462	0.203	6.2903e-17	1.94897e-06	4.49339e-21	15
Emp3	6.60227e-09	0.916959	1	0.328	0.00018485	3.72728e-21	0.279386	0.728	0.424	1.04356e-16	6.60227e-09	7.45457e-21	15
Nars	0.00274165	0.526819	0.917	0.605	1	4.59152e-21	0.398812	0.822	0.64	1.28553e-16	0.00274165	9.18303e-21	15
Mrpl40	0.018015	0.295493	0.833	0.494	1	5.52545e-21	0.305335	0.769	0.524	1.54702e-16	0.018015	1.10509e-20	15
Bag1	0.000182785	0.360377	1	0.899	1	8.45021e-21	0.269514	0.982	0.927	2.36589e-16	0.000182785	1.69004e-20	15
Nxt1	0.000677316	0.451949	0.917	0.528	1	8.66703e-21	0.334261	0.799	0.557	2.42659e-16	0.000677316	1.73341e-20	15
2010107E04Rik	0.000553926	0.302782	1	0.98	1	1.6502e-20	0.292788	0.994	0.982	4.62023e-16	0.000553926	3.3004e-20	15
Gtf2f2	0.00108243	0.341415	0.75	0.353	1	2.53458e-20	0.283174	0.663	0.389	7.09632e-16	0.00108243	5.06916e-20	15
Tubb4b	0.0263223	0.623028	1	0.854	1	3.38922e-20	0.472462	0.911	0.869	9.48913e-16	0.0263223	6.77843e-20	15
Eif3m	0.00498387	0.365496	1	0.882	1	3.40702e-20	0.293996	0.976	0.883	9.53897e-16	0.00498387	6.81404e-20	15
Eif2s3x	0.00107485	0.294099	0.833	0.424	1	3.48529e-20	0.290005	0.71	0.449	9.75811e-16	0.00107485	6.97058e-20	15
Fam162a	0.00076072	0.415273	0.917	0.654	1	3.56169e-20	0.300266	0.858	0.697	9.97202e-16	0.00076072	7.12338e-20	15
Kif22	1.80467e-06	0.724069	0.667	0.206	0.0505272	3.60696e-20	0.258441	0.538	0.245	1.00988e-15	1.80467e-06	7.21393e-20	15
Supt16	0.000358157	0.380837	0.833	0.48	1	4.0959e-20	0.466202	0.781	0.512	1.14677e-15	0.000358157	8.19181e-20	15
Cebpz	3.86997e-05	0.455847	0.917	0.512	1	4.2002e-20	0.301531	0.74	0.504	1.17597e-15	3.86997e-05	8.40039e-20	15
Mrpl2	0.130922	0.3974	0.667	0.572	1	4.33139e-20	0.303968	0.805	0.584	1.2127e-15	0.130922	8.66278e-20	15
Sept8	6.68073e-06	0.566449	0.833	0.412	0.187047	5.08664e-20	0.256717	0.692	0.425	1.42416e-15	6.68073e-06	1.01733e-19	15
Usp50	0.000563366	0.382726	0.833	0.427	1	7.27295e-20	0.276679	0.633	0.374	2.03628e-15	0.000563366	1.45459e-19	15
Prpf8	0.000545503	0.389563	0.75	0.367	1	8.85427e-20	0.251685	0.663	0.398	2.47902e-15	0.000545503	1.77085e-19	15
Wdr18	0.0124482	0.446498	0.667	0.423	1	1.45945e-19	0.294656	0.692	0.444	4.08617e-15	0.0124482	2.9189e-19	15
Nip7	7.96025e-06	0.684497	1	0.463	0.222871	2.24675e-19	0.318384	0.716	0.502	6.29044e-15	7.96025e-06	4.49349e-19	15
Ubl4a	0.11532	0.270995	0.583	0.467	1	2.3113e-19	0.31665	0.716	0.492	6.47119e-15	0.11532	4.62261e-19	15
Ammecr1	1.89145e-07	0.641427	0.917	0.368	0.00529567	2.76728e-19	0.278723	0.639	0.376	7.74784e-15	1.89145e-07	5.53456e-19	15
Pla2g12a	4.52903e-05	0.549975	1	0.71	1	2.84406e-19	0.426712	0.787	0.698	7.96279e-15	4.52903e-05	5.68811e-19	15
Strap	0.0186805	0.371461	1	0.802	1	3.99937e-19	0.32643	0.947	0.817	1.11974e-14	0.0186805	7.99875e-19	15
Gm8186	1.04927e-07	0.633292	1	0.463	0.00293774	4.35696e-19	0.2681	0.68	0.424	1.21986e-14	1.04927e-07	8.71393e-19	15
S100a10	5.10125e-19	0.63823	0.917	0.118	1.42825e-14	1.43893e-12	0.366255	0.615	0.391	4.02872e-08	1.43893e-12	1.02025e-18	15
Med30	0.0483058	0.329752	0.5	0.336	1	5.88807e-19	0.294649	0.633	0.372	1.64854e-14	0.0483058	1.17761e-18	15
Glo1	0.033643	0.286355	0.917	0.79	1	6.84756e-19	0.442478	0.87	0.78	1.91718e-14	0.033643	1.36951e-18	15
Rrp15	0.0981921	0.270538	0.583	0.388	1	8.71569e-19	0.296283	0.657	0.401	2.44022e-14	0.0981921	1.74314e-18	15
Ncaph2	0.00253854	0.277727	0.833	0.513	1	1.18352e-18	0.294862	0.763	0.535	3.31362e-14	0.00253854	2.36704e-18	15
Eif1ad	1.41921e-07	0.631072	1	0.585	0.00397349	1.50021e-18	0.308221	0.793	0.614	4.20028e-14	1.41921e-07	3.00041e-18	15
Urod	0.099788	0.256246	0.667	0.477	1	2.05006e-18	0.668138	0.651	0.452	5.73977e-14	0.099788	4.10013e-18	15
Psmg3	0.00275186	0.566045	0.75	0.414	1	2.23541e-18	0.325346	0.651	0.421	6.25871e-14	0.00275186	4.47083e-18	15
Cmtm7	5.35924e-07	0.903114	0.917	0.35	0.0150048	2.26786e-18	0.584258	0.592	0.397	6.34956e-14	5.35924e-07	4.53572e-18	15
Lsm7	5.69203e-07	0.648215	0.917	0.507	0.0159365	2.55509e-18	0.299764	0.698	0.475	7.15375e-14	5.69203e-07	5.11018e-18	15
Mrpl42	6.924e-07	0.692475	1	0.827	0.0193858	3.50393e-18	0.349127	0.935	0.828	9.81031e-14	6.924e-07	7.00787e-18	15
Dus1l	2.58764e-07	0.510514	1	0.359	0.00724486	4.09488e-18	0.284146	0.627	0.379	1.14649e-13	2.58764e-07	8.18976e-18	15
Nfs1	0.00867723	0.379904	0.583	0.344	1	4.58689e-18	0.267973	0.58	0.336	1.28424e-13	0.00867723	9.17378e-18	15
Pdcd2	2.66112e-09	0.57195	0.833	0.223	7.45059e-05	4.63847e-18	0.26739	0.467	0.223	1.29868e-13	2.66112e-09	9.27695e-18	15
Uqcr10	1.10357e-05	0.398482	1	0.984	0.308976	4.96048e-18	0.25441	1	0.984	1.38883e-13	1.10357e-05	9.92095e-18	15
Mtfr1	0.0269902	0.344049	0.5	0.27	1	6.27985e-18	0.335182	0.521	0.279	1.75823e-13	0.0269902	1.25597e-17	15
Eif4ebp1	9.68835e-09	0.797569	1	0.639	0.000271254	8.62345e-18	0.310797	0.852	0.684	2.41439e-13	9.68835e-09	1.72469e-17	15
Banf1	0.000555304	0.38215	1	0.836	1	2.93115e-17	0.286052	0.923	0.871	8.20665e-13	0.000555304	5.86231e-17	15
Ccnd2	0.0114765	0.789561	0.667	0.483	1	3.28763e-17	0.379474	0.811	0.63	9.2047e-13	0.0114765	6.57526e-17	15
Tsn	0.979632	0.531676	0.917	0.841	1	4.124e-17	0.28685	0.935	0.838	1.15464e-12	0.979632	8.248e-17	15
Lsm8	0.00123377	0.3357	0.917	0.702	1	4.56254e-17	0.284775	0.905	0.727	1.27742e-12	0.00123377	9.12507e-17	15
Spcs3	0.683476	0.544383	0.417	0.478	1	4.91757e-17	0.258935	0.71	0.461	1.37682e-12	0.683476	9.83513e-17	15
Mrpl15	0.167506	0.29858	0.667	0.664	1	5.43388e-17	0.289542	0.811	0.683	1.52138e-12	0.167506	1.08678e-16	15
Cct4	6.18595e-08	0.725367	1	0.884	0.00173194	5.71748e-17	0.326381	0.953	0.894	1.60078e-12	6.18595e-08	1.1435e-16	15
Rpa3	0.00981127	0.281906	0.75	0.463	1	6.74688e-17	0.272397	0.704	0.463	1.88899e-12	0.00981127	1.34938e-16	15
Acin1	0.00803948	0.257171	1	0.807	1	7.76566e-17	0.282647	0.953	0.803	2.17423e-12	0.00803948	1.55313e-16	15
Polr2h	1.77206e-05	0.424011	0.917	0.475	0.49614	9.34422e-17	0.315003	0.722	0.532	2.61619e-12	1.77206e-05	1.86884e-16	15
Cbx5	0.0369836	0.318691	0.667	0.581	1	1.28519e-16	0.273887	0.822	0.614	3.59828e-12	0.0369836	2.57039e-16	15
Hnrnpu	0.000172872	0.417346	1	0.809	1	2.65179e-16	0.30533	0.917	0.839	7.42447e-12	0.000172872	5.30357e-16	15
Mospd3	8.95277e-10	1.04058	1	0.598	2.5066e-05	3.56996e-16	0.344764	0.787	0.636	9.99519e-12	8.95277e-10	7.13993e-16	15
Notch2	1.29725e-11	0.657431	0.667	0.111	3.63204e-07	5.25752e-16	0.278069	0.314	0.118	1.472e-11	1.29725e-11	1.0515e-15	15
Mrps18c	0.579669	0.26255	0.417	0.677	1	5.91405e-16	0.271437	0.834	0.704	1.65582e-11	0.579669	1.18281e-15	15
Mrps25	1.41004e-05	0.441262	1	0.517	0.394783	6.13788e-16	0.256393	0.74	0.555	1.71848e-11	1.41004e-05	1.22758e-15	15
Sod2	2.97099e-05	0.47419	1	0.683	0.831817	1.01261e-15	0.329234	0.864	0.702	2.83511e-11	2.97099e-05	2.02522e-15	15
Setd8	0.0029938	0.254424	0.917	0.524	1	1.13304e-15	0.312963	0.716	0.57	3.1723e-11	0.0029938	2.26609e-15	15
Slc25a38	0.00246655	0.325099	0.583	0.256	1	1.87077e-15	0.347426	0.473	0.252	5.23778e-11	0.00246655	3.74154e-15	15
Ndufs6	0.000136094	0.333271	1	0.921	1	2.19656e-15	0.289409	0.97	0.925	6.14992e-11	0.000136094	4.39311e-15	15
Magoh	0.143511	0.272181	0.917	0.699	1	2.8563e-15	0.281213	0.864	0.707	7.99708e-11	0.143511	5.71261e-15	15
Tmem238	6.49872e-08	0.516634	1	0.419	0.00181951	3.62349e-15	0.270375	0.71	0.503	1.01451e-10	6.49872e-08	7.24699e-15	15
Sdf2l1	0.129437	0.298524	0.5	0.364	1	6.14996e-15	0.253157	0.627	0.375	1.72187e-10	0.129437	1.22999e-14	15
Smim20	0.00107	0.3014	0.917	0.443	1	1.02129e-14	0.301378	0.675	0.462	2.85942e-10	0.00107	2.04259e-14	15
Hars	0.00542631	0.250979	0.75	0.384	1	1.11361e-14	0.285441	0.645	0.421	3.11788e-10	0.00542631	2.22721e-14	15
Eny2	0.000529185	0.399028	1	0.822	1	1.24902e-14	0.256903	0.941	0.845	3.49701e-10	0.000529185	2.49804e-14	15
Slc25a3	8.19919e-05	0.569563	1	0.977	1	1.48016e-14	0.261135	1	0.98	4.14414e-10	8.19919e-05	2.96031e-14	15
Acsl5	0.000135156	0.675561	0.833	0.451	1	1.93482e-14	0.326409	0.734	0.515	5.4171e-10	0.000135156	3.86963e-14	15
Cct8	0.0146437	0.430388	0.917	0.801	1	1.97019e-14	0.293435	0.899	0.812	5.51613e-10	0.0146437	3.94037e-14	15
Rpgrip1	1.14767e-06	0.638318	0.917	0.374	0.0321324	4.76451e-14	0.397587	0.639	0.406	1.33397e-09	1.14767e-06	9.52901e-14	15
Fdx1l	0.0206307	0.287102	0.833	0.526	1	5.98425e-14	0.263054	0.751	0.58	1.67547e-09	0.0206307	1.19685e-13	15
Cbx3	4.92644e-05	0.691053	1	0.9	1	2.19678e-13	0.32775	0.988	0.923	6.15054e-09	4.92644e-05	4.39355e-13	15
Slirp	6.96006e-08	0.792904	1	0.774	0.00194868	2.30745e-13	0.27892	0.888	0.786	6.46041e-09	6.96006e-08	4.61491e-13	15
Brix1	0.00148005	0.260727	0.833	0.413	1	2.45478e-13	0.310323	0.633	0.454	6.87288e-09	0.00148005	4.90955e-13	15
Taf1d	0.0317811	0.436194	0.75	0.556	1	3.01405e-13	0.302031	0.74	0.573	8.43873e-09	0.0317811	6.0281e-13	15
Mdh2	0.00328947	0.411358	1	0.925	1	8.60258e-13	0.264959	0.97	0.933	2.40855e-08	0.00328947	1.72052e-12	15
Ppp1r14b	1.9298e-05	0.547835	1	0.715	0.540306	1.31995e-12	0.306006	0.799	0.797	3.6956e-08	1.9298e-05	2.6399e-12	15
Timm13	7.29181e-07	0.507077	1	0.938	0.0204156	2.74003e-12	0.30177	0.964	0.948	7.67152e-08	7.29181e-07	5.48005e-12	15
Smc1a	0.0534513	0.405036	0.917	0.654	1	4.04576e-12	0.253404	0.846	0.68	1.13273e-07	0.0534513	8.09152e-12	15
Mrpl14	0.00268089	0.30348	0.917	0.705	1	8.2931e-12	0.252306	0.864	0.742	2.3219e-07	0.00268089	1.65862e-11	15
Exosc1	0.00226353	0.44495	0.833	0.439	1	3.43431e-11	0.285449	0.627	0.465	9.61539e-07	0.00226353	6.86863e-11	15
Crip1	7.81984e-09	0.98764	1	0.514	0.00021894	7.58174e-10	0.508693	0.74	0.617	2.12273e-05	7.81984e-09	1.51635e-09	15
Lgals1	2.741e-05	0.498457	1	0.561	0.767424	2.1747e-08	0.361971	0.828	0.677	0.000608873	2.741e-05	4.34941e-08	15
Gstm5	0.00166585	0.30992	1	0.769	1	3.91608e-08	0.315426	0.852	0.754	0.00109642	0.00166585	7.83216e-08	15
C1qb	0	3.68576	1	0.003	0	0	4.07093	1	0.003	0	0	0	16
C1qc	0	3.57822	1	0.002	0	0	3.94041	1	0.002	0	0	0	16
C1qa	0	3.4205	1	0.002	0	0	4.00709	1	0.002	0	0	0	16
Ctss	0	2.9966	1	0.005	0	1.14739e-280	3.10693	1	0.012	3.21246e-276	1.14739e-280	0	16
Ccl4	0	2.88082	0.733	0.002	0	0	4.55212	1	0.008	0	0	0	16
Tyrobp	0	2.85065	1	0.006	0	4.47348e-227	3.5508	1	0.016	1.25248e-222	4.47348e-227	0	16
Csf1r	0	2.39894	1	0.006	0	0	2.41365	1	0.007	0	0	0	16
Cx3cr1	0	2.29423	1	0.006	0	1.18009e-281	2.46014	1	0.012	3.30402e-277	1.18009e-281	0	16
Aif1	0	2.20011	1	0.002	0	0	2.49285	1	0.001	0	0	0	16
Ly86	0	2.03578	1	0.003	0	0	2.93296	1	0.006	0	0	0	16
Tnf	0	1.97783	1	0.005	0	3.18098e-90	1.72001	0.824	0.028	8.90612e-86	3.18098e-90	0	16
Bcl2a1b	0	1.9185	0.733	0.004	0	3.37004e-285	2.6368	0.882	0.009	9.43544e-281	3.37004e-285	0	16
Fcgr3	0	1.90228	1	0.003	0	0	2.00601	1	0.002	0	0	0	16
Gpr84	0	1.87226	0.733	0.001	0	0	1.94861	0.941	0.001	0	0	0	16
Trem2	0	1.76712	1	0.001	0	0	2.79777	1	0.001	0	0	0	16
P2ry12	0	1.76697	1	0.001	0	0	2.06012	0.647	0.002	0	0	0	16
Fcrls	0	1.68864	0.733	0.001	0	0	2.80956	1	0.001	0	0	0	16
Gpr34	0	1.65884	1	0.001	0	0	1.82935	0.882	0.001	0	0	0	16
Spi1	0	1.60346	1	0.004	0	1.90198e-196	1.64481	0.765	0.01	5.32515e-192	1.90198e-196	0	16
Ccl12	0	1.52207	0.867	0.001	0	0	0.977286	0.824	0.001	0	0	0	16
Il1a	0	1.49228	0.733	0	0	0	1.8989	0.941	0.001	0	0	0	16
Cd53	0	1.47384	0.867	0.005	0	3.90752e-225	1.52194	0.824	0.01	1.09403e-220	3.90752e-225	0	16
Tmem119	0	1.47285	0.667	0.003	0	0	1.66651	0.529	0.003	0	0	0	16
Pld4	0	1.46855	0.867	0.003	0	0	1.70223	0.824	0.007	0	0	0	16
Osm	0	1.43519	0.733	0.001	0	0	1.34616	0.765	0.003	0	0	0	16
Crybb1	0	1.32109	0.667	0.002	0	0	1.61136	0.824	0.001	0	0	0	16
Lair1	0	1.26724	0.867	0.001	0	0	1.33886	1	0.003	0	0	0	16
Nlrp3	0	1.25418	0.733	0.001	0	0	0.747972	0.529	0.001	0	0	0	16
Ppfia4	0	1.13976	0.933	0.006	0	4.91858e-146	0.691554	0.529	0.007	1.37711e-141	4.91858e-146	0	16
Cd14	0	1.13145	0.8	0.005	0	6.56312e-222	2.39663	0.706	0.008	1.83754e-217	6.56312e-222	0	16
C5ar1	0	1.10028	1	0.001	0	0	1.12876	0.706	0.001	0	0	0	16
Evi2a	0	1.04073	0.933	0.001	0	0	1.54998	0.882	0.003	0	0	0	16
Fgd2	0	1.01055	0.867	0.007	0	0	1.09206	1	0.008	0	0	0	16
Fcgr1	0	0.935306	0.933	0.001	0	0	0.756855	0.353	0.001	0	0	0	16
Plek	0	0.914961	1	0.007	0	1.16252e-138	1.72854	0.706	0.013	3.25483e-134	1.16252e-138	0	16
P2ry6	0	0.908066	0.8	0.001	0	0	0.999413	0.588	0.002	0	0	0	16
Adgre1	0	0.893001	0.8	0	0	0	1.22137	0.941	0.002	0	0	0	16
Siglech	0	0.884496	0.467	0.001	0	0	1.21648	0.353	0	0	0	0	16
Fcgr2b	0	0.868332	1	0.001	0	1.94797e-193	0.930479	0.412	0.003	5.45393e-189	1.94797e-193	0	16
Bhlhe41	0	0.84213	0.6	0.002	0	2.88738e-253	0.573346	0.588	0.004	8.08407e-249	2.88738e-253	0	16
Hck	0	0.82784	0.667	0.001	0	9.71604e-216	0.74013	0.529	0.004	2.7203e-211	9.71604e-216	0	16
Tnfaip8l2	0	0.825357	0.8	0.002	0	1.08824e-175	0.847338	0.529	0.005	3.04685e-171	1.08824e-175	0	16
Lpcat2	0	0.824961	0.867	0.003	0	0	0.963502	0.765	0.003	0	0	0	16
Ptprc	0	0.742076	0.8	0.005	0	2.35052e-60	0.628263	0.471	0.013	6.581e-56	2.35052e-60	0	16
Sla	0	0.741362	0.467	0.002	0	9.86062e-246	0.60952	0.412	0.002	2.76078e-241	9.86062e-246	0	16
Nckap1l	0	0.718048	0.733	0.003	0	0	0.766089	0.824	0.004	0	0	0	16
Ikzf1	0	0.711698	0.6	0.002	0	4.76026e-113	0.793732	0.647	0.013	1.33278e-108	4.76026e-113	0	16
Mpeg1	0	0.700598	0.467	0.001	0	0	1.28608	0.941	0.005	0	0	0	16
Clec4a2	0	0.698562	0.4	0.001	0	7.58163e-263	0.381052	0.294	0.001	2.1227e-258	7.58163e-263	0	16
Tifab	0	0.684379	0.467	0	0	0	0.47666	0.353	0	0	0	0	16
P2ry13	0	0.671661	0.667	0	0	0	0.577915	0.353	0	0	0	0	16
Cd84	0	0.668088	0.8	0.002	0	4.53795e-77	0.342437	0.294	0.004	1.27053e-72	4.53795e-77	0	16
C3ar1	0	0.63943	0.8	0.001	0	0	1.63732	0.941	0	0	0	0	16
Traf3ip3	0	0.616912	0.867	0.006	0	2.29403e-72	0.330369	0.412	0.008	6.42282e-68	2.29403e-72	0	16
Ptafr	0	0.580449	0.333	0.001	0	0	0.826567	0.529	0.001	0	0	0	16
BC035044	0	0.575427	0.733	0.003	0	1.33597e-257	0.55115	0.412	0.002	3.74045e-253	1.33597e-257	0	16
Bcl2a1a	0	0.569977	0.267	0	0	2.17549e-136	0.279681	0.235	0.001	6.09094e-132	2.17549e-136	0	16
Vav1	0	0.552442	0.6	0.001	0	0	0.839982	0.706	0.003	0	0	0	16
Csf2rb	0	0.533779	0.467	0.002	0	1.32608e-282	0.521417	0.471	0.002	3.71277e-278	1.32608e-282	0	16
Cd86	0	0.513823	0.4	0.001	0	0	0.977571	0.706	0.001	0	0	0	16
Ccl24	0	0.432187	0.533	0	0	0	0.280321	0.235	0	0	0	0	16
Casp1	0	0.400319	0.533	0.001	0	0	0.397178	0.471	0.002	0	0	0	16
Hpgd	0	0.384151	0.533	0.001	0	2.00765e-59	0.391083	0.235	0.003	5.62101e-55	2.00765e-59	0	16
Gna15	0	0.367743	0.467	0.002	0	7.43922e-86	0.496605	0.353	0.005	2.08283e-81	7.43922e-86	0	16
Bcl2a1d	0	0.347461	0.4	0.001	0	9.53004e-73	0.5338	0.235	0.003	2.66822e-68	9.53004e-73	0	16
Lrrc25	0	0.344509	0.467	0.002	0	2.18701e-85	0.265508	0.294	0.003	6.12319e-81	2.18701e-85	0	16
AF251705	6.01747e-290	0.762489	0.467	0.002	1.68477e-285	0	0.961383	0.647	0.003	0	6.01747e-290	0	16
Bin2	9.7591e-220	0.780056	0.6	0.005	2.73235e-215	0	1.34344	1	0.008	0	9.7591e-220	0	16
Pkib	1.64398e-141	0.315444	0.2	0.001	4.60282e-137	0	0.65671	0.588	0.002	0	1.64398e-141	0	16
Cebpa	4.41168e-77	0.557111	0.467	0.009	1.23518e-72	0	1.23504	0.765	0.006	0	4.41168e-77	0	16
Slfn2	5.96268844262703e-308	0.692705	0.733	0.005	1.66943e-303	7.79111e-09	0.354055	0.235	0.024	0.000218135	7.79111e-09	1.19254e-307	16
Susd3	3.2657e-306	0.802038	0.6	0.003	9.14331e-302	2.47828e-152	0.664608	0.471	0.005	6.93868e-148	2.47828e-152	6.5314e-306	16
Ptgs1	9.28521e-175	1.14431	0.8	0.011	2.59967e-170	3.08167e-276	1.61553	1	0.013	8.62805e-272	9.28521e-175	6.16333e-276	16
Parvg	7.53659e-272	0.406749	0.4	0.002	2.11009e-267	1.22184e-153	0.45657	0.471	0.005	3.4209e-149	1.22184e-153	1.50732e-271	16
5430427O19Rik	1.06437e-269	0.280418	0.267	0.001	2.98004e-265	6.15155e-221	0.513768	0.294	0.001	1.72231e-216	6.15155e-221	2.12875e-269	16
Myo1f	1.15891e-262	0.509028	0.4	0.002	3.24471e-258	2.39323e-169	0.724409	0.412	0.003	6.70057e-165	2.39323e-169	2.31781e-262	16
Cd74	1.71934e-262	2.05936	0.8	0.007	4.81381e-258	1.42306e-24	0.70917	0.353	0.018	3.98429e-20	1.42306e-24	3.43868e-262	16
Abcc3	1.29954e-261	0.381052	0.467	0.002	3.63846e-257	1.21979e-108	0.277595	0.294	0.003	3.41517e-104	1.21979e-108	2.59909e-261	16
Lyz2	2.43744e-257	1.43191	0.933	0.01	6.82435e-253	2.17654e-180	2.10149	0.941	0.018	6.09388e-176	2.17654e-180	4.87488e-257	16
Apbb1ip	6.28131e-152	0.641862	0.4	0.003	1.75864e-147	5.80525e-257	1.65846	1	0.014	1.62535e-252	6.28131e-152	1.16105e-256	16
Rhoh	8.88322e-251	0.822338	0.733	0.006	2.48712e-246	1.5321e-132	0.799132	0.706	0.013	4.28958e-128	1.5321e-132	1.77664e-250	16
Fcer1g	2.73175e-249	2.66844	1	0.012	7.64834e-245	3.25289e-155	2.97686	1	0.024	9.10744e-151	3.25289e-155	5.46349e-249	16
Fermt3	2.64605e-237	0.731993	0.933	0.011	7.40842e-233	8.63649e-12	0.39966	0.235	0.018	2.41804e-07	8.63649e-12	5.2921e-237	16
Cryba4	6.26549e-234	0.956788	0.667	0.006	1.75421e-229	3.25658e-143	1.18133	0.588	0.008	9.11777e-139	3.25658e-143	1.2531e-233	16
Tnfrsf13b	1.60636e-233	0.488544	0.467	0.003	4.49748e-229	2.44936e-48	0.278149	0.294	0.006	6.85771e-44	2.44936e-48	3.21272e-233	16
Rac2	1.11621e-229	1.57651	0.733	0.007	3.12516e-225	1.08101e-134	1.57765	1	0.027	3.0266e-130	1.08101e-134	2.23242e-229	16
Hpgds	4.07603e-74	1.28331	0.733	0.024	1.14121e-69	4.49836e-223	1.37756	1	0.016	1.25945e-218	4.07603e-74	8.99672e-223	16
Cd52	2.227e-222	1.96526	0.733	0.007	6.23516e-218	1.46454e-164	2.53873	1	0.022	4.10043e-160	1.46454e-164	4.45401e-222	16
Rapsn	1.55078e-218	0.374465	0.467	0.003	4.34187e-214	1.21881e-104	0.54727	0.294	0.003	3.41243e-100	1.21881e-104	3.10156e-218	16
Syngr1	2.60544e-216	1.02489	0.867	0.011	7.2947e-212	6.81035e-136	1.71612	0.824	0.018	1.90676e-131	6.81035e-136	5.21087e-216	16
Alox5ap	2.2577e-214	1.74248	1	0.015	6.32112e-210	1.92805e-43	0.929817	0.706	0.044	5.39816e-39	1.92805e-43	4.51541e-214	16
Gpr183	4.05282e-189	0.428929	0.333	0.002	1.13471e-184	2.46879e-204	0.53089	0.412	0.003	6.91213e-200	4.05282e-189	4.93759e-204	16
Arhgap30	7.5666e-107	0.710576	0.267	0.002	2.1185e-102	4.6604e-176	0.794547	0.588	0.007	1.30482e-171	7.5666e-107	9.32079e-176	16
Ifi27l2a	7.59869e-175	1.25518	0.733	0.009	2.12748e-170	3.74868e-27	0.817812	0.471	0.03	1.04956e-22	3.74868e-27	1.51974e-174	16
Pou2f2	1.96842e-168	0.486466	0.6	0.006	5.51117e-164	1.35111e-86	0.937277	0.588	0.014	3.78284e-82	1.35111e-86	3.93683e-168	16
Ms4a6d	2.39396e-167	0.524209	0.267	0.001	6.70262e-163	2.33821e-132	0.644421	0.412	0.004	6.54651e-128	2.33821e-132	4.78793e-167	16
Hvcn1	3.53792e-31	0.376051	0.2	0.004	9.90547e-27	8.83661e-167	0.857089	0.588	0.007	2.47408e-162	3.53792e-31	1.76732e-166	16
Lsp1	2.49482e-164	1.41213	0.733	0.01	6.985e-160	8.03224e-118	1.2862	0.765	0.018	2.24887e-113	8.03224e-118	4.98964e-164	16
Plcb2	3.394e-152	0.300514	0.333	0.002	9.50251e-148	1.27546e-37	0.264539	0.176	0.003	3.57102e-33	1.27546e-37	6.78799e-152	16
Fmnl1	7.16389e-141	0.502773	0.667	0.01	2.00575e-136	1.57669e-17	0.295497	0.235	0.012	4.41441e-13	1.57669e-17	1.43278e-140	16
Il1b	1.99839e-69	1.36233	0.267	0.003	5.59509e-65	1.92421e-140	1.29896	0.471	0.005	5.3874e-136	1.99839e-69	3.84842e-140	16
Slc15a3	2.94988e-135	1.05429	0.867	0.018	8.25908e-131	1.19851e-94	2.22325	1	0.041	3.35559e-90	1.19851e-94	5.89977e-135	16
Cd48	6.87073e-134	0.544636	0.333	0.002	1.92367e-129	2.12703e-89	0.757177	0.471	0.009	5.95526e-85	2.12703e-89	1.37415e-133	16
Ramp1	2.48513e-132	0.477448	0.733	0.013	6.95787e-128	2.63376e-11	0.254556	0.294	0.028	7.37399e-07	2.63376e-11	4.97026e-132	16
0610040J01Rik	1.84983e-119	0.317616	0.333	0.003	5.17916e-115	7.28534e-32	0.481138	0.176	0.004	2.03975e-27	7.28534e-32	3.69967e-119	16
Cd33	5.8502e-119	0.813264	0.8	0.017	1.63794e-114	1.73691e-10	0.739764	0.412	0.062	4.86301e-06	1.73691e-10	1.17004e-118	16
Blnk	1.13428e-76	0.418851	0.2	0.002	3.17575e-72	5.89313e-119	0.443883	0.353	0.004	1.64996e-114	1.13428e-76	1.17863e-118	16
Ccl3	1.65493e-58	2.12079	0.733	0.03	4.63348e-54	1.41434e-118	4.0098	1	0.032	3.95986e-114	1.65493e-58	2.82868e-118	16
Abcd2	3.02889e-117	0.444903	0.533	0.007	8.4803e-113	3.45733e-27	0.44208	0.235	0.008	9.67983e-23	3.45733e-27	6.05779e-117	16
Lat2	5.34012e-29	0.930376	0.333	0.012	1.49513e-24	6.01613e-109	0.889472	0.706	0.017	1.6844e-104	5.34012e-29	1.20323e-108	16
Gm26740	7.5666e-107	0.4039	0.267	0.002	2.1185e-102	1.7508e-69	0.38832	0.353	0.006	4.9019e-65	1.7508e-69	1.51332e-106	16
Hcst	1.42413e-102	0.407117	0.467	0.007	3.98727e-98	2.85203e-62	0.445867	0.471	0.013	7.98512e-58	2.85203e-62	2.84825e-102	16
Ptpn6	1.17983e-96	0.699434	0.867	0.025	3.30328e-92	2.7257e-34	0.524393	0.471	0.024	7.6314e-30	2.7257e-34	2.35966e-96	16
Selplg	7.95781e-42	0.821684	0.6	0.028	2.22803e-37	3.41219e-92	1.47906	0.824	0.027	9.55344e-88	7.95781e-42	6.82438e-92	16
Galnt12	1.39543e-62	0.373817	0.4	0.008	3.90692e-58	3.91858e-89	0.663747	0.647	0.017	1.09712e-84	1.39543e-62	7.83715e-89	16
Tbxas1	6.2336e-82	0.665472	0.4	0.006	1.74528e-77	4.12526e-87	0.550262	0.471	0.009	1.15499e-82	6.2336e-82	8.25052e-87	16
Hk2	1.75156e-84	0.723327	0.867	0.029	4.90401e-80	3.85161e-85	2.14344	0.824	0.03	1.07837e-80	1.75156e-84	7.70322e-85	16
Cd37	7.65795e-84	0.714694	0.467	0.008	2.14407e-79	8.61358e-77	0.984461	0.647	0.02	2.41163e-72	8.61358e-77	1.53159e-83	16
H2-DMa	5.57159e-83	0.636941	0.667	0.017	1.55993e-78	1.3157e-51	1.08748	0.588	0.025	3.6837e-47	1.3157e-51	1.11432e-82	16
Ncf1	2.01514e-51	1.2732	0.6	0.023	5.64198e-47	6.83131e-79	0.990328	1	0.049	1.91263e-74	2.01514e-51	1.36626e-78	16
Dock8	1.49357e-71	0.421586	0.333	0.005	4.18171e-67	3.58063e-42	0.307198	0.353	0.011	1.0025e-37	3.58063e-42	2.98715e-71	16
Zeb2os	4.42222e-18	0.490048	0.467	0.04	1.23813e-13	4.28767e-71	0.902384	0.882	0.042	1.20046e-66	4.42222e-18	8.57534e-71	16
Slc37a2	1.95966e-14	0.313743	0.2	0.009	5.48667e-10	5.1218e-71	0.76145	0.471	0.011	1.434e-66	1.95966e-14	1.02436e-70	16
Fyb	1.08403e-19	1.07088	0.467	0.037	3.03508e-15	9.45036e-68	1.25546	0.882	0.044	2.64591e-63	1.08403e-19	1.89007e-67	16
Mrc1	8.62023e-67	0.794642	0.533	0.014	2.41349e-62	0.00413259	0.257865	0.118	0.021	1	0.00413259	1.72405e-66	16
Coro1a	1.36743e-58	2.50324	0.733	0.031	3.82854e-54	2.76227e-63	2.06848	1	0.063	7.7338e-59	1.36743e-58	5.52453e-63	16
Hmha1	2.18631e-61	0.501031	0.667	0.023	6.12123e-57	2.04978e-12	0.366523	0.353	0.038	5.73896e-08	2.04978e-12	4.37262e-61	16
Ubash3b	8.02699e-45	0.375081	0.6	0.026	2.2474e-40	1.45307e-60	0.850168	0.706	0.031	4.06831e-56	8.02699e-45	2.90614e-60	16
Cd68	6.13036e-49	1.42404	1	0.073	1.71638e-44	4.67096e-60	2.39739	1	0.067	1.30777e-55	6.13036e-49	9.34191e-60	16
Il6ra	1.93631e-57	0.676589	0.667	0.025	5.42128e-53	3.52412e-38	0.687528	0.588	0.034	9.86682e-34	3.52412e-38	3.87262e-57	16
Snta1	1.24635e-55	0.663591	0.733	0.032	3.48954e-51	6.90406e-21	0.508522	0.471	0.04	1.933e-16	6.90406e-21	2.49271e-55	16
Timp2	3.2195e-53	1.10972	0.933	0.055	9.01396e-49	5.56945e-42	1.43989	0.941	0.086	1.55933e-37	5.56945e-42	6.43901e-53	16
Arhgap9	7.78957e-53	0.384446	0.4	0.01	2.18092e-48	2.22253e-47	0.588995	0.412	0.013	6.22264e-43	2.22253e-47	1.55791e-52	16
Dapp1	1.07004e-51	0.320787	0.533	0.017	2.99591e-47	5.98022e-10	0.406608	0.294	0.033	1.67434e-05	5.98022e-10	2.14009e-51	16
Lpl	7.82064e-51	0.681259	0.933	0.057	2.18962e-46	8.25514e-37	2.28854	0.588	0.035	2.31127e-32	8.25514e-37	1.56413e-50	16
Tmem106a	6.42443e-50	0.40659	0.6	0.023	1.79871e-45	1.45837e-16	0.505714	0.412	0.039	4.08314e-12	1.45837e-16	1.28489e-49	16
Tlr2	5.64344e-46	0.337125	0.467	0.015	1.58005e-41	2.38837e-34	0.592106	0.412	0.018	6.68696e-30	2.38837e-34	1.12869e-45	16
Ifi30	1.56395e-45	1.75698	1	0.076	4.37876e-41	1.60275e-11	1.03576	0.529	0.095	4.48738e-07	1.60275e-11	3.12791e-45	16
Aim2	1.80395e-44	0.642456	1	0.075	5.05071e-40	1.54574e-12	0.510683	0.588	0.107	4.32776e-08	1.54574e-12	3.60791e-44	16
Cfh	2.07573e-43	0.892963	0.733	0.041	5.81162e-39	4.54149e-15	0.460235	0.294	0.021	1.27153e-10	4.54149e-15	4.15146e-43	16
Ncf2	5.58707e-37	0.994067	0.867	0.071	1.56427e-32	2.60746e-39	0.980668	0.882	0.079	7.30037e-35	5.58707e-37	5.21492e-39	16
Dnase2a	4.46174e-39	0.661852	0.867	0.066	1.2492e-34	1.77943e-08	0.600029	0.353	0.056	0.000498205	1.77943e-08	8.92347e-39	16
Arl4c	3.83965e-10	0.697355	0.467	0.073	1.07503e-05	7.81868e-39	1.57148	1	0.111	2.18907e-34	3.83965e-10	1.56374e-38	16
1700003F12Rik	2.81575e-12	0.451097	0.4	0.044	7.88353e-08	2.46725e-37	0.642906	0.706	0.051	6.9078e-33	2.81575e-12	4.93449e-37	16
Lst1	1.32413e-36	1.06867	0.867	0.071	3.70731e-32	1.41693e-21	1.39292	0.647	0.077	3.96712e-17	1.41693e-21	2.64826e-36	16
Fam105a	1.44659e-36	1.31284	0.733	0.05	4.05015e-32	1.36352e-34	0.774225	0.706	0.055	3.81757e-30	1.36352e-34	2.89317e-36	16
Sall1	1.67315e-09	0.356368	0.333	0.04	4.6845e-05	4.06936e-35	0.900256	0.647	0.045	1.13934e-30	1.67315e-09	8.13873e-35	16
Sdc4	4.70038e-34	1.87361	0.867	0.079	1.31601e-29	2.02951e-14	2.20364	0.706	0.147	5.68222e-10	2.02951e-14	9.40076e-34	16
Pde3b	9.74682e-32	0.682104	0.733	0.056	2.72891e-27	3.12065e-30	1.07651	0.824	0.092	8.73721e-26	3.12065e-30	1.94936e-31	16
Lag3	1.98247e-07	0.574454	0.267	0.033	0.00555052	2.61903e-31	0.715155	0.529	0.034	7.33277e-27	1.98247e-07	5.23807e-31	16
Cxcl2	6.40892e-31	1.6291	0.467	0.023	1.79437e-26	1.31779e-13	1.82009	0.647	0.125	3.68954e-09	1.31779e-13	1.28178e-30	16
Irf5	2.09125e-28	0.628637	0.867	0.093	5.85509e-24	3.15705e-17	0.66483	0.706	0.115	8.8391e-13	3.15705e-17	4.18251e-28	16
Rab3il1	3.88485e-28	0.786811	0.933	0.11	1.08768e-23	4.19229e-22	0.766418	0.588	0.06	1.17376e-17	4.19229e-22	7.7697e-28	16
Ms4a6c	5.93264e-28	0.324057	0.267	0.008	1.66102e-23	1.97943e-12	0.260426	0.176	0.01	5.54201e-08	1.97943e-12	1.18653e-27	16
Mertk	4.86452e-12	0.498841	0.467	0.061	1.36197e-07	6.29725e-27	0.850802	0.647	0.061	1.7631e-22	4.86452e-12	1.25945e-26	16
Pla2g15	6.65259e-14	0.291568	0.467	0.051	1.86259e-09	1.70317e-26	0.521387	0.588	0.049	4.76854e-22	6.65259e-14	3.40635e-26	16
Sema4d	2.62021e-26	0.554614	0.467	0.027	7.33607e-22	1.4773e-06	0.254354	0.294	0.05	0.0413615	1.4773e-06	5.24042e-26	16
Stxbp2	7.93358e-26	0.453586	0.6	0.046	2.22124e-21	2.7328e-16	0.450146	0.471	0.051	7.65128e-12	2.7328e-16	1.58672e-25	16
Olfml3	2.72196e-14	1.59253	0.8	0.172	7.62095e-10	1.26117e-25	2.03767	1	0.187	3.53101e-21	2.72196e-14	2.52233e-25	16
Arsb	1.44877e-21	1.12274	0.733	0.09	4.05627e-17	2.25272e-25	1.36785	0.765	0.094	6.30716e-21	1.44877e-21	4.50544e-25	16
Tnfsf9	7.41e-18	0.309259	0.533	0.051	2.07465e-13	3.34971e-25	0.599965	0.588	0.052	9.37851e-21	7.41e-18	6.69941e-25	16
Ltc4s	4.08251e-25	1.80164	1	0.164	1.14302e-20	2.39634e-08	0.955136	0.765	0.289	0.000670926	2.39634e-08	8.16502e-25	16
Slc16a3	0.0181604	0.277179	0.2	0.063	1	4.1926e-25	1.3543	0.941	0.15	1.17384e-20	0.0181604	8.3852e-25	16
Cd83	3.70822e-08	1.78528	0.733	0.288	0.00103823	4.80334e-25	2.46895	1	0.193	1.34484e-20	3.70822e-08	9.60669e-25	16
Laptm5	5.77161e-22	2.14091	1	0.192	1.61594e-17	1.3404e-24	2.03517	1	0.196	3.75285e-20	5.77161e-22	2.6808e-24	16
Cd79b	1.69885e-24	0.270249	0.267	0.009	4.75644e-20	3.09012e-22	0.402514	0.353	0.02	8.65173e-18	3.09012e-22	3.3977e-24	16
Tmem141	3.56169e-14	0.472295	0.6	0.086	9.97203e-10	3.98038e-24	0.771655	0.765	0.097	1.11443e-19	3.56169e-14	7.96077e-24	16
Nme4	1.49421e-22	0.473801	0.733	0.08	4.18348e-18	1.98369e-06	0.288008	0.412	0.096	0.0555394	1.98369e-06	2.98842e-22	16
Hcls1	4.9813e-22	0.758666	0.8	0.105	1.39466e-17	0.00524096	0.795789	0.412	0.217	1	0.00524096	9.9626e-22	16
Irf8	2.4206e-21	0.955553	0.733	0.086	6.77721e-17	1.37697e-21	1.24846	0.824	0.128	3.85525e-17	2.4206e-21	2.75395e-21	16
Basp1	6.43499e-13	1.14451	0.733	0.151	1.80167e-08	3.33126e-21	2.08168	1	0.238	9.32686e-17	6.43499e-13	6.66252e-21	16
Neurl3	4.50892e-21	0.267904	0.2	0.006	1.26241e-16	5.81141e-11	0.396261	0.353	0.043	1.62708e-06	5.81141e-11	9.01783e-21	16
Nfkbid	1.00976e-12	1.07819	0.733	0.152	2.82712e-08	1.02124e-20	0.828192	0.882	0.165	2.85926e-16	1.00976e-12	2.04248e-20	16
Slc29a3	1.58586e-20	0.351686	0.6	0.056	4.4401e-16	6.80637e-13	0.573702	0.471	0.066	1.90565e-08	6.80637e-13	3.17172e-20	16
Cryl1	3.12496e-20	0.600083	0.6	0.061	8.74927e-16	6.59729e-11	0.469994	0.412	0.059	1.84711e-06	6.59729e-11	6.24992e-20	16
Lacc1	4.29272e-20	0.709435	0.667	0.077	1.20188e-15	1.11383e-05	0.560655	0.412	0.111	0.311849	1.11383e-05	8.58545e-20	16
Phgdh	6.71624e-20	1.11641	0.733	0.096	1.88041e-15	5.96664e-08	0.645426	0.529	0.136	0.00167054	5.96664e-08	1.34325e-19	16
Naaa	7.35938e-20	1.16492	0.467	0.037	2.06048e-15	3.08363e-08	0.500171	0.235	0.026	0.000863355	3.08363e-08	1.47188e-19	16
Maf	1.16675e-19	1.07632	0.933	0.178	3.26668e-15	3.29437e-13	1.04854	0.706	0.153	9.22357e-09	3.29437e-13	2.33351e-19	16
Rp2	3.76277e-17	0.44387	0.733	0.103	1.0535e-12	1.8309e-19	0.679785	0.706	0.103	5.12614e-15	3.76277e-17	3.66179e-19	16
Mylip	9.80562e-05	0.728218	0.533	0.217	1	3.9243e-19	1.00928	1	0.245	1.09873e-14	9.80562e-05	7.84861e-19	16
Ctsc	7.70715e-19	1.33742	1	0.231	2.15785e-14	0.0128575	1.18771	0.412	0.241	1	0.0128575	1.54143e-18	16
Pycard	2.32757e-06	0.716923	0.8	0.378	0.0651674	8.66251e-19	1.58487	1	0.289	2.42533e-14	2.32757e-06	1.7325e-18	16
Ang	1.05264e-18	0.606252	0.667	0.082	2.94719e-14	2.09833e-10	0.471632	0.588	0.127	5.87491e-06	2.09833e-10	2.10529e-18	16
Celf2	1.87581e-18	1.16589	0.933	0.166	5.25189e-14	1.93933e-12	0.923049	0.706	0.17	5.42975e-08	1.93933e-12	3.75162e-18	16
Hmox1	1.82784e-08	1.59885	0.733	0.264	0.000511758	3.5742e-18	1.34043	1	0.295	1.00071e-13	1.82784e-08	7.1484e-18	16
Mt2	1.22795e-15	0.736865	0.467	0.046	3.438e-11	7.384e-18	2.25313	0.588	0.074	2.06737e-13	1.22795e-15	1.4768e-17	16
Was	1.12449e-15	0.299623	0.2	0.009	3.14834e-11	1.04727e-17	0.291618	0.235	0.012	2.93215e-13	1.12449e-15	2.09455e-17	16
Gm20186	1.62872e-17	0.70567	0.533	0.054	4.5601e-13	9.65331e-06	0.412538	0.294	0.058	0.270273	9.65331e-06	3.25744e-17	16
Plekho1	2.24282e-17	0.775489	0.733	0.114	6.27944e-13	3.40648e-11	0.81584	0.706	0.184	9.53747e-07	3.40648e-11	4.48563e-17	16
Gas6	3.00541e-17	1.41009	1	0.236	8.41455e-13	0.0238491	0.55424	0.412	0.237	1	0.0238491	6.01082e-17	16
Cyth4	3.97499e-07	0.394705	0.4	0.076	0.0111292	4.06005e-17	1.07964	0.647	0.099	1.13673e-12	3.97499e-07	8.12011e-17	16
Csf2ra	2.44442e-11	0.673348	0.533	0.087	6.8439e-07	8.24415e-17	0.635626	0.647	0.098	2.3082e-12	2.44442e-11	1.64883e-16	16
Mt1	9.24912e-17	1.78441	1	0.282	2.58957e-12	4.6919e-13	3.1792	0.882	0.311	1.31364e-08	4.6919e-13	1.84982e-16	16
Xlr	1.29657e-16	0.701711	0.933	0.187	3.63012e-12	2.45146e-06	0.511929	0.588	0.194	0.068636	2.45146e-06	2.59313e-16	16
Khk	2.07099e-16	0.924523	0.867	0.184	5.79835e-12	5.86598e-12	0.952054	0.706	0.169	1.64236e-07	5.86598e-12	4.14197e-16	16
Unc93b1	2.58122e-16	1.56838	1	0.293	7.22689e-12	9.57998e-12	1.33749	0.824	0.253	2.6822e-07	9.57998e-12	5.16243e-16	16
Itgb5	2.95802e-16	1.11236	1	0.258	8.28187e-12	3.24473e-11	1.38115	0.824	0.294	9.08461e-07	3.24473e-11	5.91605e-16	16
Rnase4	5.33388e-16	1.09716	1	0.299	1.49338e-11	3.15001e-15	1.57967	1	0.406	8.81941e-11	3.15001e-15	1.06678e-15	16
Arhgap19	7.43461e-16	0.343472	0.533	0.059	2.08154e-11	0.000231433	0.5109	0.294	0.077	1	0.000231433	1.48692e-15	16
Mafb	7.79253e-07	0.595749	0.733	0.257	0.0218175	4.52964e-15	0.938649	0.765	0.163	1.26821e-10	7.79253e-07	9.05928e-15	16
Hebp1	8.88142e-12	0.49821	0.6	0.105	2.48662e-07	6.82513e-15	0.666852	0.706	0.132	1.9109e-10	8.88142e-12	1.36503e-14	16
Hexb	8.90727e-13	2.47406	1	0.457	2.49386e-08	8.99207e-15	3.00178	1	0.465	2.5176e-10	8.90727e-13	1.79841e-14	16
Rgs10	1.12931e-14	1.79726	1	0.348	3.16184e-10	6.80435e-14	1.84651	1	0.406	1.90508e-09	6.80435e-14	2.25862e-14	16
Abi3	1.57734e-14	0.470054	0.733	0.12	4.41624e-10	2.35488e-05	0.926333	0.588	0.279	0.659319	2.35488e-05	3.15468e-14	16
Apoe	1.99162e-09	2.78538	1	0.636	5.57615e-05	3.0104e-14	3.21588	1	0.491	8.42851e-10	1.99162e-09	6.02079e-14	16
Ntpcr	3.03796e-09	0.625482	0.8	0.267	8.50569e-05	5.00999e-14	0.897445	0.882	0.262	1.4027e-09	3.03796e-09	1.002e-13	16
Psat1	4.0381e-07	0.348409	0.733	0.232	0.0113059	7.45209e-14	0.869255	0.882	0.256	2.08644e-09	4.0381e-07	1.49042e-13	16
Creg1	2.12162e-05	0.479602	0.933	0.517	0.594011	8.23334e-14	1.3805	1	0.507	2.30517e-09	2.12162e-05	1.64667e-13	16
Sirpa	1.87415e-05	0.610902	0.867	0.471	0.524725	8.63912e-14	1.41136	1	0.476	2.41878e-09	1.87415e-05	1.72782e-13	16
Arrb2	1.75658e-06	0.522468	0.467	0.116	0.0491807	1.05306e-13	0.921362	0.706	0.155	2.94835e-09	1.75658e-06	2.10611e-13	16
Ptpn18	1.88069e-06	0.687338	0.933	0.527	0.0526554	1.34525e-13	1.36281	1	0.481	3.76642e-09	1.88069e-06	2.69049e-13	16
Ccrl2	0.000105714	0.60812	0.6	0.255	1	1.44489e-13	1.26248	0.882	0.277	4.04541e-09	0.000105714	2.88978e-13	16
Ears2	2.54826e-13	0.251823	0.467	0.052	7.13462e-09	0.000367614	0.251638	0.235	0.053	1	0.000367614	5.09652e-13	16
Prkcd	4.90485e-13	0.442866	0.667	0.115	1.37326e-08	5.45971e-05	0.321803	0.471	0.16	1	5.45971e-05	9.80971e-13	16
Ctsz	2.92683e-11	1.85636	1	0.685	8.19453e-07	5.05273e-13	2.17113	1	0.712	1.41466e-08	2.92683e-11	1.01055e-12	16
Arl5c	5.34013e-05	0.342453	0.333	0.076	1	6.18105e-13	0.521987	0.529	0.083	1.73057e-08	5.34013e-05	1.23621e-12	16
Ctsd	7.62758e-09	1.58031	1	0.765	0.000213557	6.5854e-13	3.54323	1	0.759	1.84378e-08	7.62758e-09	1.31708e-12	16
Lgmn	8.4722e-11	2.3155	1	0.785	2.37205e-06	7.02263e-13	2.93813	1	0.774	1.9662e-08	8.4722e-11	1.40453e-12	16
Sowahc	1.0617e-09	0.771466	0.467	0.078	2.97254e-05	7.28648e-13	0.505705	0.529	0.083	2.04007e-08	1.0617e-09	1.4573e-12	16
Sh3bp1	7.80277e-13	0.769582	0.667	0.127	2.18462e-08	0.926037	0.256692	0.118	0.142	1	0.926037	1.56055e-12	16
Ctsb	1.35792e-10	1.35935	1	0.833	3.80191e-06	8.67523e-13	2.62275	1	0.848	2.42889e-08	1.35792e-10	1.73505e-12	16
Got1	5.63987e-06	0.346481	0.467	0.116	0.157905	8.77356e-13	0.860434	0.647	0.136	2.45642e-08	5.63987e-06	1.75471e-12	16
Grn	1.15225e-10	1.16116	1	0.767	3.22607e-06	1.01815e-12	1.68466	1	0.79	2.85061e-08	1.15225e-10	2.03629e-12	16
Ftl1	2.18611e-11	1.2065	1	1	6.12066e-07	1.06725e-12	1.60592	1	1	2.98808e-08	2.18611e-11	2.13449e-12	16
Nfkbiz	1.07317e-12	1.54781	1	0.439	3.00467e-08	0.000680729	1.01271	0.647	0.517	1	0.000680729	2.14634e-12	16
Psap	8.80827e-10	1.41518	1	0.931	2.46614e-05	1.15719e-12	1.51356	1	0.933	3.2399e-08	8.80827e-10	2.31438e-12	16
Cst3	4.34628e-09	1.59172	1	0.997	0.000121687	1.16938e-12	1.7373	1	0.995	3.27404e-08	4.34628e-09	2.33877e-12	16
Daglb	0.00227321	0.262608	0.4	0.153	1	1.45312e-12	0.943243	0.706	0.163	4.06844e-08	0.00227321	2.90624e-12	16
Zfp36	5.29487e-11	1.71254	1	0.709	1.48246e-06	1.45545e-12	1.63695	1	0.783	4.07496e-08	5.29487e-11	2.9109e-12	16
Bin1	1.76994e-12	1.42648	1	0.502	4.95547e-08	1.51127e-07	1.10198	0.941	0.57	0.00423125	1.51127e-07	3.53988e-12	16
Cotl1	5.57196e-06	1.50057	1	0.722	0.156004	1.879e-12	1.32193	1	0.817	5.26083e-08	5.57196e-06	3.75801e-12	16
[truncated: 1,259 more rows]
