# Supplementary material for: Mapping endothelial-cell diversity in cerebral cavernous malformations at single-cell resolution
Source: eLife. 2020 Nov 3;9:e61413. doi: 10.7554/eLife.61413 (PMC7609066; doi:10.7554/eLife.61413)
Supplement: Supplementary file 8. — The genes are considered differentially expressed if p_val_adj < 0.05. [file elife-61413-supp8.xlsx]

## Sheet: Supplementary File 8
Supplementary File 8. Differentially expressed genes between Pdcd10 (Ccm3) ko and Pdcd10 (Ccm3) wt in each cluster.
The genes are considered differentially expressed if p_val_adj<0.05.
gene	p_val	avg_logFC	pct.1	pct.2	p_val_adj	reg	cluster
Ly6a	1.84291e-151	0.747196	0.761	0.533	5.15977e-147	up	0
Phlda3	6.35905e-280	0.685957	0.471	0.058	1.78041e-275	up	0
Odc1	1.47021e-119	0.678313	0.824	0.687	4.11631e-115	up	0
Wfdc1	8.1832e-182	0.570364	0.912	0.728	2.29113e-177	up	0
Apln	4.71131e-79	0.512928	0.885	0.788	1.31907e-74	up	0
B2m	5.97865e-265	0.508917	0.99	0.969	1.6739e-260	up	0
Vim	5.18816e-203	0.508381	0.989	0.979	1.45258e-198	up	0
Cdkn1a	2.00451e-93	0.503399	0.935	0.875	5.61223e-89	up	0
Crip1	3.18994e-59	0.490861	0.451	0.277	8.93118e-55	up	0
Ifitm3	1.99984e-143	0.488186	0.812	0.588	5.59916e-139	up	0
Hspb1	8.4542e-119	0.472149	0.94	0.86	2.36701e-114	up	0
Capg	5.42905e-147	0.437953	0.835	0.65	1.52002e-142	up	0
Plaur	1.01452e-120	0.431798	0.63	0.372	2.84046e-116	up	0
Serpine1	1.42706e-77	0.425528	0.396	0.182	3.99549e-73	up	0
H2-D1	5.80273e-170	0.423931	0.958	0.896	1.62465e-165	up	0
Anxa2	2.50567e-139	0.402603	0.97	0.944	7.01538e-135	up	0
Icam1	5.39094e-60	0.395444	0.479	0.289	1.50935e-55	up	0
Ifitm2	4.16737e-102	0.394044	0.729	0.542	1.16678e-97	up	0
Ldha	5.22311e-156	0.393796	0.986	0.965	1.46237e-151	up	0
Col4a1	1.63219e-120	0.38401	0.975	0.951	4.56981e-116	up	0
Rps27l	5.28339e-145	0.383967	0.977	0.966	1.47924e-140	up	0
Fxyd5	2.08104e-118	0.37892	0.906	0.776	5.8265e-114	up	0
Tinagl1	9.12953e-113	0.375865	0.393	0.135	2.55609e-108	up	0
Adam15	2.63004e-108	0.373304	0.733	0.504	7.36358e-104	up	0
Atf3	6.7609e-45	0.366596	0.612	0.463	1.89292e-40	up	0
S100a11	8.45703e-95	0.361909	0.866	0.754	2.3678e-90	up	0
Apold1	7.99425e-99	0.360497	0.962	0.922	2.23823e-94	up	0
Gngt2	1.58741e-114	0.359208	0.526	0.253	4.44442e-110	up	0
Aprt	1.57942e-73	0.358958	0.809	0.696	4.42205e-69	up	0
Bax	4.09115e-99	0.355972	0.881	0.797	1.14544e-94	up	0
Ccnd2	9.15293e-95	0.355359	0.609	0.348	2.56264e-90	up	0
Gapdh	9.56297e-95	0.348719	0.986	0.971	2.67744e-90	up	0
Hist1h2bc	9.96607e-69	0.348667	0.788	0.619	2.7903e-64	up	0
Jund	1.33649e-86	0.347844	0.982	0.956	3.74191e-82	up	0
H2-K1	3.53059e-89	0.346664	0.605	0.381	9.88496e-85	up	0
Esm1	8.99361e-28	0.336545	0.176	0.082	2.51803e-23	up	0
Cxcl12	1.37239e-14	0.330174	0.421	0.318	3.84242e-10	up	0
Klf2	4.7046e-99	0.322134	0.994	0.98	1.3172e-94	up	0
Nfkbia	5.82736e-65	0.318854	0.966	0.919	1.63154e-60	up	0
Rhoc	1.54795e-144	0.31753	0.998	0.986	4.33394e-140	up	0
Myadm	2.53564e-92	0.317199	0.601	0.369	7.09929e-88	up	0
Cltb	1.10349e-101	0.305749	0.91	0.802	3.08954e-97	up	0
Nme1	3.46476e-78	0.305084	0.878	0.757	9.70063e-74	up	0
Col4a2	4.81569e-107	0.304817	0.976	0.955	1.3483e-102	up	0
Gpx1	2.73575e-118	0.304017	0.977	0.937	7.65956e-114	up	0
Carhsp1	9.68415e-90	0.301601	0.788	0.62	2.71137e-85	up	0
Klf4	1.66219e-52	0.301503	0.925	0.877	4.65381e-48	up	0
Cd24a	2.79728e-85	0.299941	0.406	0.177	7.83183e-81	up	0
Tnfrsf12a	3.20929e-74	0.299828	0.632	0.427	8.98537e-70	up	0
Aldoa	1.92794e-83	0.297419	0.957	0.927	5.39784e-79	up	0
Mmrn2	1.1939e-43	0.292447	0.666	0.532	3.34269e-39	up	0
Tm4sf1	2.80935e-54	0.289748	0.638	0.464	7.8656e-50	up	0
Cd9	1.51652e-60	0.284746	0.679	0.508	4.24595e-56	up	0
Mcam	6.44496e-60	0.281959	0.645	0.481	1.80446e-55	up	0
Ly6c1	2.13507e-57	0.281298	0.921	0.846	5.97777e-53	up	0
Klk8	7.75574e-53	0.27996	0.537	0.371	2.17145e-48	up	0
Cotl1	2.3552e-60	0.279825	0.684	0.497	6.59408e-56	up	0
Hist1h1c	2.49227e-22	0.279239	0.62	0.523	6.97785e-18	up	0
S100a10	7.80266e-98	0.278401	0.263	0.061	2.18459e-93	up	0
Phlda1	4.80444e-43	0.277835	0.762	0.648	1.34515e-38	up	0
Mesdc1	1.75984e-67	0.276239	0.684	0.505	4.9272e-63	up	0
Tpi1	1.26459e-37	0.274785	0.808	0.745	3.54061e-33	up	0
Cyba	4.68381e-79	0.274687	0.927	0.851	1.31137e-74	up	0
Pglyrp1	3.53951e-50	0.271021	0.993	0.994	9.90993e-46	up	0
Pmepa1	1.47839e-60	0.268515	0.905	0.849	4.1392e-56	up	0
Ier3	6.43039e-29	0.268203	0.664	0.552	1.80038e-24	up	0
Hn1	5.76615e-57	0.265781	0.681	0.529	1.61441e-52	up	0
S100a6	5.36335e-78	0.262112	0.165	0.023	1.50163e-73	up	0
Bbc3	6.17086e-68	0.260346	0.499	0.293	1.72772e-63	up	0
Lpcat1	1.16795e-71	0.258221	0.602	0.388	3.27003e-67	up	0
Gm26532	5.4953e-46	0.255789	0.42	0.251	1.53857e-41	up	0
Marcksl1	4.0837e-42	0.255129	0.74	0.63	1.14335e-37	up	0
Ankrd37	1.20494e-28	0.254833	0.786	0.72	3.37359e-24	up	0
Uba52	8.47497e-40	-0.253128	0.654	0.714	2.37282e-35	down	0
Txnip	1.79515e-56	-0.258817	0.399	0.575	5.02605e-52	down	0
Slc7a1	7.73828e-61	-0.259095	0.953	0.974	2.16656e-56	down	0
Cadm1	4.14105e-59	-0.2628	0.375	0.555	1.15941e-54	down	0
Ildr2	3.04691e-62	-0.264687	0.288	0.483	8.53074e-58	down	0
Slc7a5	7.63137e-71	-0.265376	0.974	0.988	2.13663e-66	down	0
Igf1r	2.77441e-59	-0.266423	0.806	0.871	7.7678e-55	down	0
Tshz2	8.64912e-61	-0.266969	0.696	0.817	2.42158e-56	down	0
Mfsd2a	7.35374e-75	-0.269928	0.946	0.978	2.0589e-70	down	0
Car2	4.76553e-61	-0.269966	0.352	0.541	1.33425e-56	down	0
Enpp2	4.43151e-60	-0.270744	0.445	0.622	1.24073e-55	down	0
Bgn	4.52255e-34	-0.271304	0.619	0.717	1.26622e-29	down	0
Gabarapl1	1.17756e-45	-0.272869	0.818	0.871	3.29693e-41	down	0
AU021092	5.42012e-73	-0.277378	0.891	0.948	1.51752e-68	down	0
Slc1a4	5.09698e-73	-0.279688	0.815	0.894	1.42705e-68	down	0
Slc3a2	1.84261e-77	-0.279989	0.989	0.996	5.15893e-73	down	0
Gsta4	1.15615e-50	-0.286294	0.435	0.605	3.23698e-46	down	0
Hmcn1	4.89556e-80	-0.287694	0.58	0.764	1.37066e-75	down	0
Raph1	4.29992e-67	-0.288029	0.649	0.768	1.20389e-62	down	0
Pde2a	1.16358e-60	-0.301036	0.611	0.744	3.25779e-56	down	0
Slc22a8	4.06773e-94	-0.301574	0.889	0.952	1.13888e-89	down	0
Gm10076	1.08184e-84	-0.308836	0.982	0.991	3.02893e-80	down	0
Rpap3	1.4756e-50	-0.310819	0.461	0.599	4.13138e-46	down	0
Sept4	8.34987e-98	-0.311685	0.85	0.939	2.3378e-93	down	0
Hmgcs2	1.15979e-57	-0.313005	0.534	0.708	3.24717e-53	down	0
Kcna5	4.05841e-65	-0.317236	0.191	0.386	1.13627e-60	down	0
Map7	8.92172e-74	-0.33276	0.46	0.653	2.4979e-69	down	0
Gatm	9.33887e-110	-0.338013	0.892	0.95	2.6147e-105	down	0
Igfbp4	1.21741e-68	-0.341528	0.807	0.857	3.4085e-64	down	0
Trf	7.14828e-63	-0.350957	0.614	0.746	2.00138e-58	down	0
Car4	6.08285e-45	-0.351906	0.679	0.813	1.70308e-40	down	0
Slco1c1	2.27046e-100	-0.359259	0.906	0.972	6.35682e-96	down	0
Cpe	6.15375e-88	-0.395371	0.62	0.78	1.72293e-83	down	0
Slc16a1	4.32226e-116	-0.40135	0.909	0.978	1.21015e-111	down	0
Itm2a	1.67198e-163	-0.410744	0.99	0.999	4.6812e-159	down	0
Nampt	1.82127e-156	-0.415434	0.774	0.912	5.0992e-152	down	0
Pdcd10	6.4493e-170	-0.417205	0.468	0.745	1.80568e-165	down	0
Igfbp3	1.43338e-36	-0.432019	0.311	0.437	4.01317e-32	down	0
Apoe	2.5972e-64	-0.438204	0.413	0.609	7.27165e-60	down	0
Hbb-bs	2.20229e-07	-0.492963	0.652	0.672	0.00616598	down	0
Spock2	4.12486e-196	-0.4973	0.944	0.992	1.15488e-191	down	0
Fth1	2.25004e-223	-0.6351	1	1	6.29967e-219	down	0
Sepp1	0	-0.8868	0.963	0.997	0	down	0
Vim	1.32945e-08	0.90965	0.845	0.649	0.00037222	up	10
Angpt2	5.47404e-07	0.667922	0.454	0.143	0.0153262	up	10
Capg	1.28291e-07	0.612816	0.626	0.377	0.00359189	up	10
Ldha	6.64149e-09	0.595903	0.931	0.779	0.000185948	up	10
Aldoa	1.57914e-09	0.5877	0.948	0.649	4.42129e-05	up	10
Neat1	3.83061e-08	0.585498	0.517	0.169	0.00107249	up	10
S100a11	7.09632e-07	0.566053	0.759	0.455	0.0198683	up	10
Cdh5	1.45307e-06	0.549318	0.621	0.429	0.0406831	up	10
Gpx1	2.27439e-08	0.529461	0.925	0.636	0.000636784	up	10
Plk2	1.0956e-06	0.516884	0.655	0.429	0.0306746	up	10
Psph	8.88151e-11	0.507508	0.563	0.13	2.48665e-06	up	10
Fosb	4.61098e-07	0.504137	0.638	0.325	0.0129098	up	10
Nts	6.7663e-08	0.486823	0.374	0.052	0.00189443	up	10
Ctnnb1	1.52038e-09	0.482986	0.931	0.779	4.25675e-05	up	10
Cyba	1.38693e-06	0.453801	0.736	0.403	0.0388312	up	10
Jund	9.38372e-08	0.433473	0.954	0.974	0.00262725	up	10
Tpst2	5.38989e-08	0.408078	0.684	0.39	0.00150906	up	10
Sesn3	4.22325e-07	0.386891	0.609	0.299	0.0118243	up	10
Hspa1a	6.49478e-07	0.3857	0.425	0.117	0.0181841	up	10
Ddx17	1.55879e-06	0.355071	0.787	0.597	0.0436431	up	10
mt-Co1	9.48655e-09	0.342575	1	1	0.000265604	up	10
Rsrp1	1.39583e-06	0.339715	0.914	0.779	0.0390806	up	10
Gngt2	1.14476e-07	0.332631	0.5	0.143	0.0032051	up	10
Atraid	1.42809e-06	0.327989	0.845	0.623	0.0399838	up	10
Wipi1	8.63118e-08	0.326951	0.569	0.208	0.00241656	up	10
Icam1	9.03696e-08	0.325894	0.42	0.091	0.00253017	up	10
Agfg1	7.43179e-08	0.324985	0.741	0.351	0.00208075	up	10
Tpp2	1.07015e-07	0.307441	0.632	0.286	0.0029962	up	10
Zdhhc21	1.32202e-06	0.304066	0.471	0.156	0.0370141	up	10
Lage3	4.54271e-07	0.291415	0.759	0.429	0.0127187	up	10
Sac3d1	2.5951e-07	0.283834	0.598	0.247	0.00726577	up	10
Gatad2b	1.46384e-06	0.279374	0.799	0.442	0.0409847	up	10
Zbtb4	6.14928e-07	0.278933	0.471	0.143	0.0172168	up	10
Clk1	5.53246e-07	0.276934	0.862	0.688	0.0154898	up	10
Mlec	5.87596e-07	0.267184	0.713	0.351	0.0164515	up	10
Acap2	3.7701e-07	0.267139	0.523	0.208	0.0105555	up	10
Cacfd1	5.41183e-07	0.263635	0.609	0.26	0.015152	up	10
Ahnak	2.23701e-07	0.262369	0.661	0.286	0.00626318	up	10
Fchsd2	7.43202e-07	0.25909	0.448	0.104	0.0208082	up	10
Cox5a	4.51293e-07	-0.284016	0.96	1	0.0126353	down	10
Napa	8.44905e-08	-0.290929	0.655	0.831	0.00236556	down	10
Zfp414	1.59189e-06	-0.296259	0.184	0.429	0.0445696	down	10
Ankrd12	3.48093e-07	-0.298536	0.471	0.766	0.0097459	down	10
Slc25a5	7.9132e-07	-0.318629	0.977	1	0.0221554	down	10
Atp5b	2.19959e-07	-0.320026	1	1	0.00615842	down	10
Srsf6	1.72542e-06	-0.323126	0.833	0.935	0.0483082	down	10
Rpap3	1.27807e-08	-0.328681	0.31	0.623	0.000357833	down	10
Dcun1d5	5.03034e-07	-0.328744	0.805	0.935	0.0140839	down	10
Gar1	7.52651e-07	-0.329736	0.517	0.688	0.0210727	down	10
Ngdn	8.06721e-08	-0.334824	0.397	0.649	0.00225866	down	10
Mrps28	3.30974e-07	-0.34179	0.431	0.688	0.00926661	down	10
Psmb4	2.12929e-07	-0.342605	0.879	0.922	0.0059616	down	10
Arfrp1	1.0339e-08	-0.3591	0.437	0.675	0.000289471	down	10
Arl6	6.96418e-07	-0.375146	0.287	0.597	0.0194983	down	10
Nemf	5.83749e-07	-0.379627	0.443	0.662	0.0163438	down	10
Trim28	1.08532e-07	-0.382253	0.667	0.831	0.00303867	down	10
Eif4h	5.90937e-11	-0.387444	0.868	0.974	1.6545e-06	down	10
Zfand5	5.41582e-08	-0.443464	0.805	0.948	0.00151632	down	10
Immt	2.12569e-11	-0.447457	0.695	0.883	5.95151e-07	down	10
Nampt	1.60166e-09	-0.50598	0.529	0.753	4.48432e-05	down	10
Cadm1	4.45819e-07	-0.526964	0.563	0.766	0.012482	down	10
Dfna5	5.23287e-09	-0.567409	0.259	0.558	0.00014651	down	10
Ruvbl1	8.63867e-11	0.623793	0.564	0.18	2.41866e-06	up	11
Cct3	4.47176e-09	0.503145	0.812	0.5	0.0001252	up	11
Icam2	4.74802e-07	0.497346	0.238	0.023	0.0132935	up	11
Gusb	8.022e-08	0.474733	0.634	0.25	0.002246	up	11
Aes	5.24674e-07	0.459033	0.782	0.516	0.0146898	up	11
Gcsh	1.91845e-07	0.445688	0.535	0.227	0.00537127	up	11
Egln2	1.01014e-06	0.414608	0.535	0.227	0.028282	up	11
Scaf11	1.61266e-06	0.387483	0.505	0.203	0.0451513	up	11
Tmem119	1.26495e-06	0.373497	0.228	0.023	0.0354162	up	11
Bop1	1.79366e-07	0.366545	0.337	0.062	0.0050219	up	11
Slc6a6	6.11224e-07	0.363954	0.248	0.031	0.017113	up	11
Sf3a1	8.6559e-07	0.360389	0.436	0.148	0.0242348	up	11
Ctsa	1.62385e-06	0.353903	0.584	0.289	0.0454646	up	11
Dnajc8	4.92773e-07	0.334904	0.901	0.648	0.0137967	up	11
Nedd8	1.01191e-06	0.323455	0.97	0.867	0.0283313	up	11
Tnfaip3	5.00223e-07	0.320462	0.287	0.047	0.0140052	up	11
Fbxl8	2.33876e-08	0.315454	0.297	0.031	0.000654806	up	11
Cmas	5.17235e-07	0.300023	0.584	0.25	0.0144816	up	11
Mapk12	6.68891e-08	0.293347	0.287	0.031	0.00187276	up	11
Dpp8	1.72187e-06	0.284842	0.257	0.039	0.048209	up	11
Mmrn2	1.53505e-06	0.264024	0.168	0	0.0429782	up	11
Ndufa2	7.28894e-08	-0.329603	0.97	0.992	0.00204076	down	11
Mycbp	7.47165e-07	-0.389297	0.188	0.461	0.0209191	down	11
Ube2z	8.6559e-07	-0.409236	0.119	0.398	0.0242348	down	11
Ptk2	3.23735e-07	-0.448964	0.446	0.75	0.00906393	down	11
Acads	6.47294e-07	-0.450957	0.198	0.484	0.018123	down	11
Pet100	1.33846e-08	-0.477094	0.257	0.594	0.000374741	down	11
Mfge8	6.5371e-07	-0.491059	0.901	0.969	0.0183026	down	11
Itga1	1.26916e-06	-0.548066	0.564	0.727	0.035534	down	11
Hmgcs2	4.51939e-08	-0.659871	0.238	0.531	0.00126534	down	11
Cxcl12	1.62885e-10	1.31166	0.669	0.089	4.56045e-06	up	12
Wfdc1	1.25081e-15	1.05505	0.92	0.356	3.50201e-11	up	12
Ly6c1	1.44838e-11	0.843477	0.886	0.556	4.05517e-07	up	12
Id1	1.04317e-08	0.799537	0.949	0.778	0.000292066	up	12
Slc6a6	1.35476e-08	0.755744	0.737	0.289	0.000379306	up	12
Egr1	1.15219e-08	0.741493	0.891	0.622	0.000322591	up	12
Serpine1	1.05913e-07	0.671475	0.686	0.289	0.00296536	up	12
Rhoc	2.28627e-14	0.661916	0.989	0.911	6.40109e-10	up	12
Ly6a	1.508e-06	0.657364	0.709	0.289	0.0422208	up	12
Slc2a1	2.07378e-12	0.647303	0.983	0.956	5.80617e-08	up	12
Apold1	2.31574e-10	0.634427	1	1	6.48362e-06	up	12
Plaur	4.45588e-08	0.62113	0.726	0.311	0.00124756	up	12
Cd24a	7.42339e-11	0.620307	0.806	0.378	2.0784e-06	up	12
Akap13	5.05647e-13	0.593691	1	0.867	1.41571e-08	up	12
Dusp1	3.20163e-08	0.587389	0.994	0.956	0.000896391	up	12
Aprt	8.47253e-09	0.569007	0.874	0.622	0.000237214	up	12
Slc9a3r2	8.44417e-11	0.565411	0.983	0.933	2.3642e-06	up	12
Icam2	8.14046e-08	0.494833	0.931	0.822	0.00227917	up	12
Tnfrsf12a	1.45516e-10	0.483421	0.829	0.489	4.07415e-06	up	12
Klf2	1.21161e-08	0.481732	1	1	0.000339225	up	12
Col18a1	1.38082e-06	0.439624	0.64	0.244	0.0386602	up	12
Kitl	9.37558e-09	0.43943	0.931	0.778	0.000262498	up	12
Gm26532	9.71388e-07	0.427059	0.697	0.267	0.0271969	up	12
Tuba1a	5.74123e-09	0.426126	1	0.978	0.000160743	up	12
Stra6	5.03809e-08	0.412277	0.691	0.244	0.00141057	up	12
Maff	1.26043e-09	0.408941	0.88	0.4	3.52894e-05	up	12
Sfrp2	1.85554e-07	0.406431	0.686	0.289	0.00519514	up	12
Atp6v0e	1.59664e-09	0.402462	0.977	0.933	4.47028e-05	up	12
Hspb1	7.01579e-13	0.402037	0.966	0.689	1.96428e-08	up	12
Msn	1.9728e-07	0.389985	1	0.844	0.00552345	up	12
Rala	1.76113e-07	0.374328	0.977	0.911	0.00493082	up	12
Crip2	1.26946e-07	0.363803	1	0.978	0.00355422	up	12
Ccdc12	2.32698e-08	0.361996	0.954	0.889	0.000651508	up	12
Psmd7	9.31503e-07	0.358337	0.966	0.844	0.0260802	up	12
Ctnnb1	7.72133e-09	0.357493	0.96	0.956	0.000216182	up	12
Higd2a	5.58462e-08	0.357123	0.983	0.933	0.00156358	up	12
Pdlim7	2.39129e-07	0.352591	0.869	0.6	0.00669515	up	12
Trib2	2.73995e-07	0.351139	0.869	0.689	0.0076713	up	12
Ptp4a3	1.20272e-06	0.348421	1	0.978	0.0336738	up	12
Clic4	7.61042e-07	0.33122	0.943	0.911	0.0213077	up	12
Rhoa	1.38334e-07	0.330498	1	1	0.00387309	up	12
Ankrd10	3.80135e-07	0.301774	0.577	0.156	0.010643	up	12
Jarid2	9.11906e-08	0.300355	0.634	0.178	0.00255315	up	12
Frmd8	2.87333e-07	0.292692	0.669	0.222	0.00804475	up	12
Nrp2	1.36219e-06	0.281219	0.674	0.267	0.0381387	up	12
Pth1r	1.56672e-06	0.269406	0.549	0.111	0.0438649	up	12
Cdc25a	6.16734e-09	-0.253309	0.206	0.6	0.000172673	down	12
Rpl38	8.48749e-09	-0.253396	1	1	0.000237633	down	12
Cep85	1.25708e-12	-0.253514	0.126	0.578	3.51957e-08	down	12
Magohb	6.84458e-09	-0.259739	0.326	0.733	0.000191635	down	12
Crlf3	1.43779e-06	-0.27758	0.446	0.756	0.0402552	down	12
Scaf4	7.65035e-07	-0.278704	0.32	0.622	0.0214195	down	12
Pvrl2	3.37809e-07	-0.2888	0.703	0.978	0.00945799	down	12
Tmem154	1.79999e-09	-0.293892	0.291	0.711	5.03962e-05	down	12
Snhg6	9.79529e-07	-0.302472	0.88	0.978	0.0274249	down	12
Gdap10	1.46741e-06	-0.313869	0.383	0.667	0.0410845	down	12
Chka	1.71237e-07	-0.317982	0.749	0.889	0.00479429	down	12
Wipi1	6.79637e-08	-0.323977	0.577	0.889	0.00190285	down	12
Zic2	3.35937e-07	-0.324491	0.326	0.667	0.00940556	down	12
Pdcd10	1.05424e-07	-0.331947	0.737	0.911	0.00295167	down	12
Jak1	4.14461e-07	-0.33698	0.709	0.867	0.0116041	down	12
Slc16a4	2.34319e-08	-0.340542	0.417	0.778	0.000656045	down	12
Tgfb2	1.41218e-08	-0.342277	0.411	0.8	0.000395381	down	12
Gm10073	4.57998e-08	-0.357498	0.8	0.956	0.0012823	down	12
Clec14a	8.79793e-07	-0.359255	0.806	0.933	0.0246324	down	12
Clec2i	1.96668e-10	-0.362904	0.08	0.444	5.5063e-06	down	12
Cd47	2.37973e-09	-0.365819	0.783	0.933	6.66277e-05	down	12
Nrros	7.59901e-08	-0.370455	0.457	0.778	0.00212757	down	12
Sh3bp5	8.95238e-07	-0.383994	0.84	0.889	0.0250649	down	12
Ildr2	4.71129e-07	-0.384027	0.343	0.644	0.0131907	down	12
Cadm1	6.92951e-08	-0.407489	0.497	0.733	0.00194012	down	12
Samsn1	7.18763e-11	-0.460562	0.594	0.956	2.01239e-06	down	12
Slc16a1	4.60845e-07	-0.476326	0.937	1	0.0129027	down	12
Raph1	5.86899e-07	-0.507583	0.834	0.933	0.016432	down	12
Car4	2.37424e-08	-0.657105	0.771	0.978	0.00066474	down	12
Trf	4.44891e-08	-0.736943	0.846	0.911	0.00124561	down	12
Ly6a	2.71192e-24	1.1147	0.961	0.423	7.59283e-20	up	13
Ttr	3.61032e-19	0.710416	1	1	1.01082e-14	up	13
Wfdc1	4.45101e-11	0.684895	0.845	0.59	1.24619e-06	up	13
Capg	9.35126e-12	0.674056	0.798	0.436	2.61817e-07	up	13
Plaur	1.49824e-12	0.669351	0.798	0.359	4.19476e-08	up	13
Odc1	5.47469e-18	0.667452	0.992	0.962	1.5328e-13	up	13
Apold1	6.23276e-15	0.62955	1	0.897	1.74505e-10	up	13
Tnfrsf12a	1.80805e-09	0.603288	0.651	0.244	5.06217e-05	up	13
Serpine1	3.82819e-07	0.590055	0.62	0.308	0.0107182	up	13
S100a10	5.33029e-10	0.582294	0.473	0.064	1.49237e-05	up	13
8430408G22Rik	2.46321e-09	0.568762	0.744	0.372	6.8965e-05	up	13
Hspb1	6.31402e-12	0.563167	0.984	0.936	1.7678e-07	up	13
Ankrd37	2.94283e-11	0.555061	0.953	0.718	8.23935e-07	up	13
Apln	5.30652e-18	0.539946	1	1	1.48572e-13	up	13
B2m	2.37808e-15	0.51135	1	1	6.65815e-11	up	13
H2-D1	5.0882e-11	0.503115	0.969	0.949	1.42459e-06	up	13
Vim	6.98604e-17	0.490121	1	1	1.95595e-12	up	13
Aprt	8.6291e-07	0.478562	0.829	0.564	0.0241597	up	13
Ifitm3	1.55936e-10	0.474222	0.992	0.923	4.3659e-06	up	13
Gngt2	5.42766e-07	0.468602	0.566	0.231	0.0151964	up	13
S100a6	4.97793e-07	0.453468	0.349	0.051	0.0139372	up	13
Icam1	1.56048e-06	0.425864	0.752	0.474	0.0436903	up	13
Nfkbia	5.28872e-09	0.42148	0.992	0.987	0.000148074	up	13
Cdkn1a	8.65256e-08	0.421255	0.946	0.885	0.00242254	up	13
Anxa2	1.52648e-11	0.419197	0.992	0.962	4.27385e-07	up	13
H2-K1	9.77865e-07	0.418608	0.721	0.423	0.0273783	up	13
Ldha	1.22134e-11	0.418085	1	0.974	3.4195e-07	up	13
Trp53i11	4.0347e-07	0.407775	0.899	0.782	0.0112964	up	13
Adm	8.93415e-07	0.387501	0.922	0.821	0.0250138	up	13
Rhoc	3.76747e-09	0.38366	1	0.974	0.000105481	up	13
Arpc1b	6.20427e-08	0.339138	0.969	1	0.00173707	up	13
Col4a1	4.08166e-10	0.334293	1	1	1.14278e-05	up	13
Col4a2	4.93874e-08	0.321438	0.992	1	0.00138275	up	13
Slc2a1	7.44208e-07	0.30056	1	0.974	0.0208363	up	13
Klf2	1.11679e-12	0.296929	1	1	3.12678e-08	up	13
Fkbp1a	2.83663e-09	0.272753	1	1	7.94201e-05	up	13
Gnai2	1.02745e-07	0.261566	1	1	0.00287666	up	13
Rpl38	2.13e-13	-0.256909	1	1	5.96356e-09	down	13
Vwa1	1.35302e-07	-0.258059	1	1	0.00378818	down	13
Cldn5	2.28137e-31	-0.262634	1	1	6.38738e-27	down	13
Tsc22d1	1.5251e-12	-0.268525	1	1	4.26998e-08	down	13
Slc3a2	1.32676e-07	-0.293298	1	1	0.00371466	down	13
Lmo2	4.58522e-07	-0.314588	0.953	1	0.0128377	down	13
Steap3	1.91528e-07	-0.317028	0.047	0.321	0.00536241	down	13
Hbb-bt	2.57506e-12	-0.358759	1	1	7.20966e-08	down	13
Sept4	1.44245e-07	-0.363485	0.938	0.987	0.00403857	down	13
Hbb-bs	3.88703e-31	-0.374702	1	1	1.08829e-26	down	13
Igfbp4	1.86007e-07	-0.381993	0.876	0.949	0.00520782	down	13
Slc39a8	1.17233e-06	-0.382407	0.783	0.949	0.0328229	down	13
Slco1c1	1.82816e-08	-0.388194	0.915	1	0.000511848	down	13
Hba-a1	1.20986e-20	-0.390097	1	1	3.38738e-16	down	13
Slc38a5	1.94987e-08	-0.402192	0.953	1	0.000545923	down	13
Slc40a1	4.54142e-08	-0.405213	0.76	0.987	0.00127151	down	13
Dusp6	7.25674e-07	-0.410539	0.721	0.936	0.0203174	down	13
Snhg11	8.55948e-09	-0.412292	0.116	0.487	0.000239648	down	13
Slc22a8	2.09853e-08	-0.413893	0.806	0.949	0.000587546	down	13
Slc7a1	1.09799e-10	-0.417221	0.899	1	3.07416e-06	down	13
Mfsd2a	3.01077e-11	-0.423856	0.953	1	8.42954e-07	down	13
Hba-a2	6.40173e-19	-0.446406	1	1	1.79236e-14	down	13
Bgn	4.3381e-09	-0.468213	0.713	0.936	0.000121458	down	13
Gm10076	1.53812e-09	-0.497801	0.651	0.91	4.30642e-05	down	13
Slc16a1	2.324e-13	-0.513086	0.938	0.987	6.50673e-09	down	13
Trf	2.73136e-10	-0.531036	0.558	0.885	7.64726e-06	down	13
Itm2a	4.8273e-24	-0.551486	1	1	1.35155e-19	down	13
Nampt	3.95539e-11	-0.559789	0.713	0.897	1.10743e-06	down	13
Fth1	3.02071e-31	-0.563712	1	1	8.45737e-27	down	13
Myl9	1.29453e-09	-0.583018	0.659	0.897	3.62442e-05	down	13
Spock2	1.58912e-19	-0.722316	0.93	1	4.44922e-15	down	13
Sepp1	4.56215e-27	-0.769805	0.992	1	1.27731e-22	down	13
Ly6a	1.43646e-08	0.886618	0.842	0.5	0.000402181	up	14
Odc1	1.95439e-10	0.841789	1	0.923	5.47191e-06	up	14
Hspb1	1.1809e-10	0.759595	0.942	0.962	3.30629e-06	up	14
Gngt2	8.42445e-15	0.653182	0.957	0.75	2.35868e-10	up	14
Ly6c1	1.42331e-07	0.644244	0.921	0.904	0.00398499	up	14
Wfdc1	4.67227e-08	0.637914	0.878	0.788	0.00130814	up	14
Apold1	1.60239e-11	0.61694	0.986	1	4.48638e-07	up	14
Nfkbia	2.9235e-08	0.599747	0.993	0.923	0.00081852	up	14
Vim	9.94546e-11	0.543137	0.986	1	2.78453e-06	up	14
Plaur	1.46958e-10	0.52257	0.957	0.865	4.11452e-06	up	14
H2-D1	9.14105e-10	0.491915	1	1	2.55931e-05	up	14
Ccnd2	7.65555e-07	0.480795	0.647	0.308	0.021434	up	14
Klf2	4.57274e-09	0.462575	1	1	0.000128028	up	14
Cdkn1a	1.11002e-06	0.457847	0.978	1	0.0310784	up	14
Phlda3	7.45695e-08	0.449741	0.604	0.192	0.0020878	up	14
Carhsp1	3.11984e-08	0.434006	0.885	0.731	0.000873492	up	14
Kitl	3.5911e-08	0.429585	0.914	0.827	0.00100544	up	14
Ankrd37	2.59899e-07	0.424283	0.986	0.962	0.00727665	up	14
Tinagl1	5.29284e-07	0.408888	0.532	0.212	0.0148189	up	14
Adamts1	1.5686e-06	0.407689	0.899	0.808	0.0439177	up	14
Neat1	9.26468e-08	0.402241	0.842	0.615	0.00259392	up	14
Myadm	8.74103e-08	0.398866	0.935	0.827	0.00244731	up	14
Rhoc	3.64722e-11	0.386417	0.993	1	1.02115e-06	up	14
H2-K1	8.80383e-09	0.38399	0.914	0.904	0.00024649	up	14
Adam15	3.36222e-07	0.383873	0.935	0.731	0.00941355	up	14
Cd93	3.87467e-10	0.371811	1	1	1.08483e-05	up	14
Ctsh	1.39636e-08	0.369032	0.993	0.962	0.000390953	up	14
Npm1	3.38915e-07	0.367994	1	0.981	0.00948895	up	14
Klk8	6.65118e-07	0.362113	0.799	0.673	0.018622	up	14
S100a16	5.04001e-10	0.361167	1	0.923	1.4111e-05	up	14
B2m	2.00644e-09	0.360869	1	1	5.61764e-05	up	14
Anxa2	1.11008e-06	0.358709	1	1	0.03108	up	14
Smagp	5.4312e-07	0.353742	0.885	0.673	0.0152063	up	14
Dlgap4	4.24178e-07	0.352685	0.899	0.827	0.0118761	up	14
Mesdc1	1.55282e-06	0.350832	0.878	0.808	0.0434759	up	14
Jund	4.30763e-07	0.348284	1	1	0.0120605	up	14
Gm16104	1.13553e-08	0.347003	0.655	0.25	0.000317927	up	14
Tspan9	9.94625e-08	0.342618	0.892	0.827	0.00278475	up	14
Eif6	6.26593e-09	0.341498	0.957	0.923	0.000175434	up	14
Hspa1b	7.35437e-07	0.33916	0.403	0.038	0.0205908	up	14
A530084C06Rik	1.81773e-07	0.334916	0.619	0.269	0.00508929	up	14
Mif	3.55069e-07	0.332819	1	0.962	0.00994122	up	14
Akap13	1.49562e-08	0.327505	1	0.962	0.000418745	up	14
Trappc2l	3.28822e-07	0.326793	0.892	0.808	0.00920635	up	14
Wasf2	1.68599e-08	0.322962	1	1	0.000472042	up	14
Crem	1.45542e-07	0.314744	0.942	0.827	0.00407489	up	14
Rps5	4.76058e-07	0.310607	1	1	0.0133287	up	14
Pdlim7	1.07348e-07	0.30236	0.906	0.808	0.00300553	up	14
Pam16	2.42083e-07	0.300491	0.928	0.75	0.00677785	up	14
Higd2a	8.60486e-09	0.297956	0.986	1	0.000240919	up	14
Kctd12	1.15265e-06	0.294224	0.763	0.558	0.032272	up	14
Ldha	1.04585e-06	0.29314	1	1	0.0292816	up	14
Pak4	1.46944e-07	0.291969	0.633	0.327	0.00411414	up	14
Cfl1	2.3665e-10	0.282644	1	1	6.62573e-06	up	14
Csde1	1.77936e-06	0.282393	1	0.904	0.0498186	up	14
Hsd17b12	1.31758e-08	0.271942	0.899	0.712	0.000368897	up	14
Cd2bp2	3.0994e-07	0.261779	0.691	0.442	0.00867769	up	14
Naca	1.27275e-07	0.256558	1	1	0.00356345	up	14
Rpl23a	1.5829e-06	0.254862	1	1	0.0443182	up	14
D8Ertd738e	2.421e-07	0.252171	0.964	0.981	0.00677833	up	14
Mycn	4.01992e-07	0.250711	0.489	0.115	0.011255	up	14
Ppt1	8.85183e-07	-0.253525	0.568	0.846	0.0247834	down	14
Tdg	2.79428e-08	-0.254153	0.561	0.885	0.000782344	down	14
R3hdm2	2.24298e-07	-0.256627	0.482	0.75	0.00627989	down	14
Gspt1	6.52335e-07	-0.257438	0.777	0.962	0.0182641	down	14
Ildr2	1.17337e-07	-0.257446	0.482	0.827	0.00328519	down	14
Plxdc1	1.58449e-11	-0.261197	0.259	0.808	4.43625e-07	down	14
H2-Ke6	3.10646e-08	-0.2695	0.554	0.865	0.000869746	down	14
Tpd52l1	1.11831e-09	-0.26981	0.424	0.923	3.13104e-05	down	14
Enpp2	1.39041e-06	-0.270477	0.597	0.885	0.0389288	down	14
Ublcp1	1.23679e-06	-0.277372	0.424	0.788	0.0346276	down	14
Fech	1.27802e-07	-0.277373	0.381	0.75	0.0035782	down	14
Dll4	8.82934e-07	-0.279863	0.669	0.962	0.0247204	down	14
Pim3	1.15842e-07	-0.281118	0.784	0.981	0.00324334	down	14
Flywch1	1.70943e-09	-0.281376	0.446	0.885	4.78607e-05	down	14
Pdcd10	6.36687e-08	-0.281383	0.77	0.942	0.0017826	down	14
Abcc4	1.44575e-06	-0.285167	0.482	0.808	0.040478	down	14
Wdfy1	6.10168e-10	-0.300481	0.353	0.788	1.70835e-05	down	14
Limch1	1.94387e-07	-0.303779	0.748	0.962	0.00544244	down	14
Eid1	1.7531e-07	-0.307493	0.755	0.962	0.00490832	down	14
Scarb1	1.46932e-06	-0.321276	0.827	0.962	0.041138	down	14
Raph1	2.07639e-09	-0.325175	0.935	1	5.81348e-05	down	14
Fry	4.86422e-09	-0.325437	0.813	1	0.000136188	down	14
Blvrb	4.07327e-10	-0.333738	0.799	1	1.14043e-05	down	14
Ctgf	9.46435e-08	-0.344678	0.36	0.731	0.00264983	down	14
Pid1	5.08665e-09	-0.345174	0.561	0.962	0.000142416	down	14
Gnb4	7.86121e-09	-0.370265	0.921	1	0.000220098	down	14
Fth1	7.21846e-08	-0.37649	1	1	0.00202103	down	14
Bpgm	7.52435e-08	-0.439805	0.705	0.962	0.00210667	down	14
Alas2	6.98708e-07	-0.441783	0.165	0.519	0.0195624	down	14
Spock2	1.15803e-06	-0.446523	0.921	1	0.0324226	down	14
Gatm	4.28562e-08	-0.483014	0.806	1	0.00119989	down	14
Sept4	5.4184e-11	-0.505234	0.971	1	1.51704e-06	down	14
Tsc22d3	1.19909e-06	-0.551596	0.871	0.981	0.0335721	down	14
Mfsd2a	9.22547e-10	-0.560791	0.892	1	2.58295e-05	down	14
Itm2a	1.3961e-10	-0.607047	1	1	3.9088e-06	down	14
Slc16a1	1.60341e-12	-0.690109	0.863	1	4.48922e-08	down	14
Slco1c1	1.01707e-11	-0.696533	0.906	1	2.84759e-07	down	14
Sepp1	3.61843e-15	-0.995948	0.993	1	1.01309e-10	down	14
Hbb-bs	1.6726e-06	-1.29955	0.856	0.962	0.0468295	down	14
Hba-a2	1.34297e-07	-1.33878	0.54	0.865	0.00376005	down	14
Hmgb2	1.34914e-06	1.06718	1	1	0.0377731	up	15
B2m	1.3964e-07	0.946937	1	1	0.00390964	up	15
Psmb6	1.46607e-06	0.813291	0.935	1	0.0410471	up	15
Sh3pxd2b	7.94178e-08	-0.250656	0.112	0.667	0.00222354	down	15
Snx29	1.02054e-16	-0.250673	0.018	0.583	2.85731e-12	down	15
Hey2	1.65875e-06	-0.254494	0.03	0.333	0.0464418	down	15
Rab34	2.57269e-09	-0.25485	0.065	0.583	7.20302e-05	down	15
M1ap	6.16742e-08	-0.257433	0.118	0.667	0.00172675	down	15
Rpl34	5.00188e-07	-0.258251	1	1	0.0140043	down	15
Cdk14	6.3455e-14	-0.259452	0.018	0.5	1.77661e-09	down	15
Zfp777	1.36913e-07	-0.262884	0.089	0.583	0.00383329	down	15
Mastl	2.26727e-07	-0.263776	0.041	0.417	0.0063479	down	15
Adck5	2.56233e-08	-0.266478	0.124	0.75	0.0007174	down	15
Man2c1os	4.38417e-07	-0.271316	0.024	0.333	0.0122748	down	15
Ppargc1b	2.35503e-07	-0.271419	0.089	0.583	0.00659361	down	15
Rpp40	1.63824e-06	-0.276093	0.101	0.583	0.0458674	down	15
Platr27	3.0461e-08	-0.278548	0.018	0.333	0.000852847	down	15
Bicc1	8.85893e-11	-0.279234	0.077	0.667	2.48032e-06	down	15
Tmem91	2.63926e-07	-0.280095	0.024	0.333	0.00738941	down	15
Pomgnt2	1.53803e-06	-0.282131	0.03	0.333	0.0430616	down	15
Ssh3	2.63926e-07	-0.282246	0.024	0.333	0.00738941	down	15
Shroom2	4.03342e-07	-0.283424	0.071	0.5	0.0112928	down	15
Acy1	1.00536e-13	-0.286194	0.018	0.5	2.8148e-09	down	15
Irak3	4.12135e-14	-0.290466	0	0.333	1.1539e-09	down	15
B3gnt7	1.22448e-06	-0.292363	0.101	0.583	0.034283	down	15
Naglu	6.87989e-11	-0.294552	0	0.25	1.92623e-06	down	15
Ctif	2.46459e-16	-0.305194	0.03	0.667	6.90036e-12	down	15
Slc7a7	6.55848e-10	-0.308237	0.065	0.583	1.83624e-05	down	15
Prkra	9.63559e-07	-0.309941	0.189	0.833	0.0269777	down	15
Cadm1	1.9225e-08	-0.311869	0.083	0.583	0.000538261	down	15
Hsd17b4	1.06693e-06	-0.313191	0.213	0.833	0.0298719	down	15
Elmod2	2.90511e-08	-0.314813	0.083	0.583	0.000813374	down	15
B3gntl1	5.10177e-14	-0.317454	0.03	0.583	1.42839e-09	down	15
Gorasp1	3.8412e-09	-0.319336	0.065	0.583	0.000107546	down	15
Wdr92	4.1407e-07	-0.31974	0.195	0.833	0.0115931	down	15
Agk	1.60576e-06	-0.324367	0.148	0.667	0.0449581	down	15
Rfx5	2.86051e-09	-0.330794	0.112	0.75	8.00885e-05	down	15
Rnf31	6.17123e-08	-0.331356	0.083	0.583	0.00172782	down	15
Rassf5	7.68416e-07	-0.331881	0.107	0.583	0.0215141	down	15
Ebpl	9.53338e-07	-0.336033	0.231	0.833	0.0266916	down	15
Ntm	8.96404e-14	-0.338097	0.018	0.5	2.50975e-09	down	15
Recql5	1.50358e-07	-0.339654	0.095	0.583	0.00420971	down	15
Mlst8	4.32831e-09	-0.34669	0.16	0.833	0.000121184	down	15
Gns	2.59084e-07	-0.346993	0.207	0.833	0.00725382	down	15
Wdr34	6.12219e-07	-0.349833	0.178	0.75	0.0171409	down	15
Fem1a	1.34513e-06	-0.350781	0.243	0.833	0.0376609	down	15
Mipep	1.30084e-09	-0.351124	0.148	0.833	3.6421e-05	down	15
Copg2	1.10585e-07	-0.352294	0.124	0.667	0.00309616	down	15
Tmem143	5.52428e-09	-0.352786	0.071	0.583	0.000154669	down	15
Itgav	3.35494e-07	-0.353828	0.13	0.667	0.00939316	down	15
Sestd1	3.33786e-11	-0.355373	0.047	0.583	9.34534e-07	down	15
Fzd6	9.68282e-08	-0.358887	0.183	0.833	0.002711	down	15
Atrnl1	6.53478e-08	-0.366276	0.083	0.583	0.00182961	down	15
Pdcd7	1.52887e-06	-0.370422	0.349	1	0.0428052	down	15
E130308A19Rik	1.59322e-08	-0.376488	0.107	0.667	0.000446069	down	15
Yipf1	6.86791e-07	-0.386453	0.296	0.917	0.0192288	down	15
Srbd1	1.96817e-09	-0.388544	0.124	0.75	5.51048e-05	down	15
Trub2	3.70866e-07	-0.39108	0.278	0.917	0.0103835	down	15
Glg1	4.03789e-08	-0.391121	0.195	0.917	0.00113053	down	15
Ints10	3.80175e-07	-0.391552	0.118	0.667	0.0106442	down	15
Lurap1l	2.73314e-08	-0.402901	0.107	0.667	0.000765224	down	15
Tshz2	5.50105e-07	-0.411113	0.136	0.667	0.0154018	down	15
Timmdc1	2.42935e-07	-0.411167	0.231	0.917	0.00680168	down	15
Rarres1	1.59723e-12	-0.418457	0.059	0.667	4.47192e-08	down	15
Hmcn1	1.35523e-06	-0.428206	0.148	0.667	0.0379438	down	15
Tmem106c	1.01506e-06	-0.432616	0.314	0.917	0.0284198	down	15
Zfp148	1.31738e-06	-0.435089	0.325	0.917	0.036884	down	15
Arl5a	2.81019e-07	-0.438038	0.337	0.917	0.00786797	down	15
Zfp277	1.04228e-08	-0.439868	0.302	1	0.000291819	down	15
Cln6	2.53165e-07	-0.443219	0.254	0.917	0.00708812	down	15
Fam102b	1.45559e-09	-0.447882	0.201	1	4.07537e-05	down	15
Scamp2	3.22009e-07	-0.452571	0.308	0.917	0.00901562	down	15
Mob3a	1.19986e-13	-0.454644	0.148	1	3.35938e-09	down	15
1810032O08Rik	2.14319e-07	-0.460281	0.444	1	0.00600049	down	15
Iqcd	1.15466e-10	-0.476144	0.036	0.5	3.23282e-06	down	15
Prrc1	1.63939e-07	-0.487723	0.249	0.833	0.00458996	down	15
Retsat	1.55516e-07	-0.498723	0.124	0.667	0.00435413	down	15
Ugcg	1.28151e-06	-0.519483	0.462	1	0.0358797	down	15
Hddc2	8.514e-07	-0.527427	0.497	1	0.0238375	down	15
Cyb561d2	6.79418e-07	-0.531542	0.16	0.667	0.0190223	down	15
Kit	3.05364e-07	-0.537454	0.26	0.833	0.00854957	down	15
Lpar6	1.9519e-08	-0.56356	0.166	0.75	0.000546494	down	15
Tmed1	1.08307e-06	-0.568408	0.343	0.917	0.0303239	down	15
Coro1c	3.04985e-07	-0.574365	0.645	1	0.00853896	down	15
St7l	2.71959e-08	-0.586552	0.284	0.917	0.00076143	down	15
Lamb1	1.05315e-06	-0.624623	0.178	0.667	0.029486	down	15
Tmem109	3.05999e-07	-0.657927	0.385	0.917	0.00856737	down	15
Mospd3	3.0467e-07	-0.670627	0.787	1	0.00853016	down	15
Adm	8.58908e-07	-0.951666	0.178	0.667	0.0240477	down	15
Ldha	3.42924e-07	1.75676	1	1	0.00960119	up	16
Aldoa	1.06059e-07	1.40796	1	0.933	0.00296944	up	16
Ctsb	2.47471e-08	1.29734	1	1	0.000692869	up	16
Trem2	7.0706e-09	1.03109	1	1	0.000197963	up	16
Ndufa3	3.5353e-09	0.821713	1	0.933	9.89814e-05	up	16
Prdx5	3.42924e-07	0.775957	1	0.933	0.00960119	up	16
Qk	4.91407e-07	0.664749	1	1	0.0137584	up	16
Ddx49	8.03661e-07	-0.680604	0	0.933	0.0225009	down	16
Dlgap4	1.98748e-07	-0.739885	0	1	0.00556456	down	16
Hhex	1.98748e-07	-0.842592	0	1	0.00556456	down	16
Ak2	1.00346e-06	-0.846312	0.176	1	0.0280949	down	16
Prkra	8.03661e-07	-0.857273	0	0.933	0.0225009	down	16
Igsf6	8.03661e-07	-1.06511	0	0.933	0.0225009	down	16
Ly6a	5.83381e-203	0.811345	0.625	0.226	1.63335e-198	up	1
Wfdc1	8.02894e-213	0.765788	0.767	0.441	2.24794e-208	up	1
Odc1	1.00644e-150	0.716459	0.95	0.876	2.81784e-146	up	1
Apln	8.66726e-205	0.620295	0.992	0.968	2.42666e-200	up	1
Pgf	6.6635e-99	0.587259	0.474	0.186	1.86565e-94	up	1
Vim	4.13784e-215	0.581326	1	0.999	1.15851e-210	up	1
Plaur	6.83915e-190	0.567066	0.796	0.521	1.91483e-185	up	1
Hspb1	4.16019e-120	0.566293	0.874	0.766	1.16477e-115	up	1
Igfbp3	2.33606e-30	0.552043	0.506	0.376	6.5405e-26	up	1
Ly6c1	2.14142e-90	0.550322	0.735	0.544	5.99554e-86	up	1
Capg	8.68495e-227	0.522739	0.932	0.771	2.43161e-222	up	1
Fxyd5	3.15128e-219	0.517864	0.936	0.772	8.82295e-215	up	1
Esm1	3.71674e-85	0.501815	0.591	0.318	1.04061e-80	up	1
Aprt	4.19168e-162	0.490154	0.818	0.585	1.17359e-157	up	1
B2m	2.47217e-241	0.484814	0.993	0.986	6.92157e-237	up	1
Serpine1	2.63819e-104	0.481511	0.703	0.434	7.38642e-100	up	1
Klf2	1.2347e-157	0.480889	0.999	0.974	3.45691e-153	up	1
Cdkn1a	1.0467e-108	0.458342	0.981	0.968	2.93056e-104	up	1
Klf4	2.03771e-115	0.453852	0.929	0.811	5.70518e-111	up	1
Gngt2	8.79377e-184	0.445676	0.735	0.379	2.46208e-179	up	1
Rhoc	9.94442e-255	0.443058	0.998	0.997	2.78424e-250	up	1
H2-D1	6.88336e-170	0.439642	0.949	0.884	1.9272e-165	up	1
Anxa2	1.06253e-164	0.439512	0.99	0.981	2.97488e-160	up	1
Phlda3	2.03441e-159	0.436446	0.506	0.147	5.69593e-155	up	1
Tnfrsf12a	1.1962e-182	0.432153	0.753	0.424	3.34912e-178	up	1
Nfkbia	1.8735e-109	0.431169	0.979	0.957	5.24542e-105	up	1
Apold1	1.08974e-147	0.427805	0.995	0.985	3.05105e-143	up	1
8430408G22Rik	1.53824e-73	0.422561	0.714	0.476	4.30676e-69	up	1
S100a6	1.59791e-26	0.408086	0.258	0.145	4.47383e-22	up	1
Pmepa1	1.20425e-169	0.407885	0.977	0.929	3.37167e-165	up	1
Kitl	1.27707e-164	0.401953	0.895	0.714	3.57553e-160	up	1
Myadm	1.23851e-154	0.399258	0.892	0.704	3.46759e-150	up	1
Kcne3	4.35722e-121	0.389752	0.494	0.182	1.21993e-116	up	1
Cxcl1	1.97344e-54	0.376833	0.388	0.189	5.52523e-50	up	1
Ankrd37	4.45671e-107	0.376074	0.958	0.9	1.24779e-102	up	1
Carhsp1	2.75022e-130	0.372299	0.777	0.561	7.70007e-126	up	1
Adamts1	1.15383e-102	0.37104	0.882	0.732	3.2305e-98	up	1
Sfrp2	8.97842e-82	0.370899	0.716	0.504	2.51378e-77	up	1
Slc2a1	3.35408e-80	0.367685	0.976	0.924	9.39074e-76	up	1
Sat1	4.29127e-92	0.367136	0.982	0.952	1.20147e-87	up	1
Mesdc1	2.10794e-127	0.360683	0.793	0.579	5.9018e-123	up	1
Atf3	1.11778e-52	0.351106	0.809	0.713	3.12957e-48	up	1
Cxcl2	5.90408e-73	0.347246	0.186	0.016	1.65302e-68	up	1
H2-K1	8.7796e-101	0.343911	0.687	0.444	2.45811e-96	up	1
Hist1h2bc	1.96554e-63	0.334767	0.822	0.735	5.50313e-59	up	1
Jund	3.4703e-108	0.329636	0.999	0.996	9.71616e-104	up	1
Ier3	2.23887e-44	0.328511	0.846	0.771	6.26838e-40	up	1
S100a10	5.17917e-106	0.32446	0.332	0.07	1.45006e-101	up	1
Clic4	3.49819e-125	0.324321	0.911	0.795	9.79424e-121	up	1
Ldha	4.06461e-107	0.322588	0.997	0.989	1.13801e-102	up	1
Rnase1	1.04399e-82	0.319926	0.268	0.055	2.92296e-78	up	1
Ly6e	3.12639e-78	0.317739	0.905	0.834	8.75326e-74	up	1
Gpx1	4.52525e-140	0.315533	0.989	0.972	1.26698e-135	up	1
Cdh13	2.24187e-93	0.31488	0.717	0.454	6.2768e-89	up	1
Gapdh	1.14243e-113	0.31323	0.996	0.997	3.19857e-109	up	1
Dusp3	3.55245e-83	0.306411	0.982	0.944	9.94615e-79	up	1
Icam1	4.70089e-46	0.306367	0.508	0.322	1.31615e-41	up	1
Cd9	3.92934e-62	0.305239	0.813	0.69	1.10014e-57	up	1
Ctnnb1	7.2888e-125	0.300697	0.989	0.967	2.04072e-120	up	1
Akap13	2.0235e-116	0.296512	0.946	0.895	5.6654e-112	up	1
Gimap4	6.05729e-83	0.294033	0.677	0.464	1.69592e-78	up	1
Klk8	6.96973e-81	0.29379	0.592	0.353	1.95139e-76	up	1
Angpt2	4.82055e-31	0.291118	0.741	0.611	1.34966e-26	up	1
Adam15	1.09529e-87	0.286918	0.657	0.439	3.0666e-83	up	1
Mcam	5.33699e-87	0.284551	0.956	0.924	1.49425e-82	up	1
Id1	2.03677e-31	0.282205	0.874	0.826	5.70254e-27	up	1
Tpi1	7.12312e-46	0.280018	0.949	0.901	1.99433e-41	up	1
Podxl	2.87646e-84	0.275602	0.721	0.517	8.0535e-80	up	1
Dusp1	4.82034e-71	0.272364	0.986	0.954	1.3496e-66	up	1
Ahnak	5.87676e-58	0.271784	0.815	0.686	1.64538e-53	up	1
Flnb	1.35609e-73	0.268345	0.782	0.638	3.79679e-69	up	1
Rps27l	2.59807e-100	0.2657	0.992	0.987	7.27407e-96	up	1
Lpcat1	4.61074e-83	0.264741	0.714	0.513	1.29092e-78	up	1
Arpc1b	1.46122e-148	0.263968	0.998	0.995	4.09112e-144	up	1
Pdlim7	3.27454e-78	0.262144	0.823	0.671	9.16806e-74	up	1
Icam2	4.94281e-65	0.258612	0.928	0.848	1.38389e-60	up	1
Fam102b	2.68601e-54	0.258554	0.853	0.752	7.52029e-50	up	1
Anxa3	1.50654e-89	0.256986	0.99	0.979	4.21802e-85	up	1
Hspa1a	5.0795e-24	0.253176	0.51	0.392	1.42216e-19	up	1
Msn	2.3404e-101	0.253026	0.979	0.97	6.55264e-97	up	1
Cltb	2.78403e-75	0.25281	0.883	0.803	7.79473e-71	up	1
Kras	1.43696e-73	0.252715	0.799	0.634	4.02319e-69	up	1
Eif2b2	1.80211e-46	0.25012	0.73	0.601	5.04555e-42	up	1
Slc40a1	1.44718e-62	-0.250031	0.811	0.899	4.05182e-58	down	1
Pcolce	6.79358e-87	-0.251226	0.245	0.5	1.90207e-82	down	1
Kcna5	1.87055e-66	-0.253655	0.335	0.557	5.23718e-62	down	1
Aplnr	2.16296e-37	-0.260426	0.777	0.838	6.05584e-33	down	1
Tsc22d1	5.54689e-81	-0.260936	1	1	1.55302e-76	down	1
Gnb4	1.15498e-89	-0.26473	0.939	0.97	3.2337e-85	down	1
Gabarapl1	3.44656e-76	-0.266284	0.931	0.963	9.64969e-72	down	1
Slc3a2	1.46845e-67	-0.266326	0.986	0.998	4.11137e-63	down	1
Cpe	5.10503e-49	-0.266514	0.721	0.839	1.42931e-44	down	1
Prcp	1.46173e-41	-0.271176	0.513	0.657	4.09256e-37	down	1
Ptn	5.86249e-47	-0.271533	0.969	0.992	1.64138e-42	down	1
Cadm1	2.46279e-89	-0.272689	0.476	0.7	6.89531e-85	down	1
Fam13a	3.66584e-62	-0.273167	0.447	0.639	1.02636e-57	down	1
Ildr2	2.22587e-93	-0.275581	0.317	0.562	6.23198e-89	down	1
Pdcd10	1.60142e-105	-0.278144	0.655	0.829	4.48367e-101	down	1
Ptpn18	4.44519e-62	-0.285395	0.587	0.719	1.24456e-57	down	1
Igf1r	3.07968e-65	-0.285863	0.803	0.878	8.6225e-61	down	1
Tshz2	3.41084e-78	-0.287498	0.726	0.837	9.54968e-74	down	1
Gm10076	1.69015e-89	-0.289665	0.994	0.997	4.73207e-85	down	1
Mfge8	3.498e-70	-0.29513	0.906	0.95	9.7937e-66	down	1
Map7	1.19825e-84	-0.29687	0.448	0.669	3.35485e-80	down	1
Enpp2	3.39384e-97	-0.297744	0.588	0.779	9.50208e-93	down	1
Slc7a1	5.50433e-66	-0.299352	0.84	0.926	1.5411e-61	down	1
Rbp1	4.82554e-44	-0.302458	0.369	0.531	1.35105e-39	down	1
Cldn5	1.16715e-117	-0.305373	1	1	3.26779e-113	down	1
Fabp5	3.00974e-33	-0.310044	0.827	0.873	8.42667e-29	down	1
Slc39a8	1.27502e-118	-0.313276	0.869	0.956	3.56979e-114	down	1
Sept4	8.46035e-114	-0.328349	0.98	0.991	2.36873e-109	down	1
Slc38a5	1.60292e-55	-0.330902	0.819	0.895	4.48786e-51	down	1
Apoe	3.12618e-52	-0.338277	0.424	0.597	8.75269e-48	down	1
Gsta4	1.23538e-120	-0.348049	0.23	0.52	3.45882e-116	down	1
Myl9	4.53643e-88	-0.354169	0.916	0.97	1.27011e-83	down	1
Slc1a4	2.17804e-128	-0.360028	0.804	0.922	6.09809e-124	down	1
Igfbp4	3.31508e-143	-0.370485	0.932	0.965	9.28155e-139	down	1
Nampt	1.05693e-140	-0.379722	0.691	0.858	2.95919e-136	down	1
Slco1c1	8.87539e-86	-0.397055	0.754	0.892	2.48493e-81	down	1
Fth1	3.10729e-157	-0.43891	1	1	8.69978e-153	down	1
Gatm	4.98955e-135	-0.445273	0.705	0.884	1.39697e-130	down	1
Slc16a1	3.95793e-76	-0.450033	0.699	0.852	1.10814e-71	down	1
Bgn	7.57395e-155	-0.514685	0.834	0.962	2.12056e-150	down	1
Trf	1.21068e-152	-0.544183	0.856	0.941	3.38965e-148	down	1
Spock2	7.83756e-157	-0.558625	0.845	0.961	2.19436e-152	down	1
Itm2a	9.46278e-232	-0.574025	0.974	0.991	2.64939e-227	down	1
Car4	1.63305e-138	-0.581266	0.734	0.897	4.57222e-134	down	1
Sepp1	0	-0.956729	0.973	0.996	0	down	1
Ly6a	1.16479e-166	0.684441	0.829	0.613	3.26119e-162	up	2
Apln	1.28273e-140	0.622199	0.958	0.889	3.59138e-136	up	2
Hspb1	1.18388e-163	0.593894	0.929	0.873	3.31462e-159	up	2
Odc1	1.70189e-130	0.565347	0.95	0.919	4.76496e-126	up	2
Wfdc1	3.62285e-153	0.554156	0.867	0.729	1.01432e-148	up	2
8430408G22Rik	1.13381e-112	0.468859	0.671	0.374	3.17444e-108	up	2
B2m	5.13125e-234	0.439529	0.996	0.987	1.43665e-229	up	2
Ankrd37	2.1372e-117	0.430276	0.897	0.815	5.98374e-113	up	2
Apold1	7.26803e-164	0.427697	0.985	0.979	2.0349e-159	up	2
Capg	2.06034e-172	0.423444	0.894	0.734	5.76853e-168	up	2
Plaur	2.26363e-153	0.413725	0.786	0.528	6.33771e-149	up	2
Fxyd5	1.87288e-163	0.406379	0.929	0.845	5.24369e-159	up	2
Vim	2.7953e-177	0.402218	1	0.995	7.82628e-173	up	2
Nfkbia	3.46106e-101	0.386934	0.978	0.961	9.69028e-97	up	2
H2-D1	6.64395e-156	0.381299	0.948	0.93	1.86017e-151	up	2
Cdkn1a	6.36247e-85	0.372935	0.955	0.945	1.78137e-80	up	2
Klf2	1.07108e-122	0.369273	0.988	0.986	2.9988e-118	up	2
Rhoc	4.33409e-198	0.356611	1	0.988	1.21346e-193	up	2
Sfrp2	1.48453e-74	0.348698	0.665	0.415	4.15639e-70	up	2
Ly6c1	4.97979e-69	0.344576	0.909	0.827	1.39424e-64	up	2
Gngt2	8.17583e-143	0.340122	0.728	0.453	2.28907e-138	up	2
S100a6	8.60347e-85	0.313687	0.38	0.137	2.4088e-80	up	2
Anxa2	2.64552e-113	0.309587	0.993	0.985	7.40692e-109	up	2
Aprt	3.89635e-77	0.308476	0.922	0.863	1.0909e-72	up	2
Serpine1	2.02712e-67	0.308225	0.645	0.422	5.67554e-63	up	2
Myadm	4.52956e-103	0.306412	0.865	0.773	1.26819e-98	up	2
Pmepa1	2.32342e-114	0.306221	0.953	0.93	6.50512e-110	up	2
Jund	2.24171e-96	0.30388	0.992	0.984	6.27633e-92	up	2
Klf4	6.07911e-66	0.299471	0.939	0.925	1.70203e-61	up	2
Sat1	1.60324e-54	0.296793	0.975	0.948	4.48875e-50	up	2
Adamts1	2.01896e-73	0.287887	0.844	0.754	5.65269e-69	up	2
Cd9	1.10883e-84	0.286261	0.789	0.629	3.10452e-80	up	2
Ldha	1.09785e-125	0.283727	0.999	0.994	3.07375e-121	up	2
H2-K1	7.59293e-101	0.282587	0.742	0.569	2.12587e-96	up	2
Cyba	6.41333e-102	0.277128	0.969	0.959	1.7956e-97	up	2
Gpx1	2.49595e-113	0.271915	0.985	0.979	6.98816e-109	up	2
Icam1	4.52745e-39	0.268193	0.666	0.556	1.2676e-34	up	2
Klk8	1.52984e-90	0.266194	0.761	0.576	4.28324e-86	up	2
Gimap4	7.72721e-97	0.26349	0.744	0.528	2.16346e-92	up	2
Cdc42se1	9.26491e-108	0.263315	0.905	0.843	2.59399e-103	up	2
Pglyrp1	6.70362e-48	0.26301	0.973	0.967	1.87688e-43	up	2
Tnfrsf12a	1.02005e-81	0.258256	0.76	0.59	2.85595e-77	up	2
Carhsp1	5.09565e-87	0.257556	0.875	0.823	1.42668e-82	up	2
Mesdc1	5.44692e-93	0.256468	0.889	0.786	1.52503e-88	up	2
Phlda3	6.37223e-106	0.2546	0.492	0.191	1.7841e-101	up	2
Rala	1.56946e-113	0.252991	0.964	0.946	4.39419e-109	up	2
Slc22a8	1.70463e-83	-0.251395	0.896	0.957	4.77263e-79	down	2
Gsta4	3.73716e-44	-0.256057	0.482	0.627	1.04633e-39	down	2
Hmgcs2	8.66649e-52	-0.260669	0.533	0.714	2.42644e-47	down	2
Gatm	1.31579e-89	-0.26878	0.902	0.962	3.68396e-85	down	2
Cryab	1.5123e-75	-0.273406	0.205	0.437	4.23414e-71	down	2
Map7	1.39029e-89	-0.276389	0.58	0.767	3.89254e-85	down	2
Mgp	1.10685e-19	-0.285931	0.163	0.26	3.09897e-15	down	2
Apoe	1.18455e-50	-0.286116	0.529	0.685	3.31651e-46	down	2
Igfbp4	1.87981e-105	-0.286211	0.962	0.964	5.2631e-101	down	2
Pdcd10	1.27652e-140	-0.289421	0.713	0.873	3.57401e-136	down	2
Slc7a1	4.36842e-75	-0.292122	0.944	0.961	1.22307e-70	down	2
Uba52	7.00584e-86	-0.310229	0.827	0.891	1.96149e-81	down	2
Car4	5.64448e-70	-0.320965	0.868	0.94	1.58034e-65	down	2
Cpe	6.48173e-80	-0.325352	0.721	0.845	1.81476e-75	down	2
Itm2a	9.29202e-94	-0.330701	0.975	0.979	2.60158e-89	down	2
Trf	2.73831e-43	-0.335966	0.74	0.824	7.66673e-39	down	2
Gm10076	1.72547e-105	-0.352074	0.996	0.998	4.83097e-101	down	2
Slco1c1	1.46842e-103	-0.359237	0.854	0.942	4.11128e-99	down	2
Slc16a1	4.86017e-98	-0.387396	0.857	0.946	1.36075e-93	down	2
Hbb-bs	5.04332e-14	-0.398043	0.794	0.843	1.41203e-09	down	2
Nampt	5.99586e-150	-0.417031	0.85	0.915	1.67872e-145	down	2
Bgn	2.70418e-157	-0.444787	0.934	0.986	7.57117e-153	down	2
Myl9	3.1997e-92	-0.448351	0.924	0.943	8.95852e-88	down	2
Hba-a1	3.81541e-07	-0.467608	0.543	0.607	0.0106824	down	2
Hba-a2	3.25223e-08	-0.520947	0.462	0.544	0.00091056	down	2
Hist1h2ap	2.89284e-27	-0.541746	0.585	0.646	8.09937e-23	down	2
Spock2	1.66974e-206	-0.589254	0.93	0.967	4.67493e-202	down	2
Fth1	2.59422e-210	-0.771683	1	1	7.26329e-206	down	2
Sepp1	2.21773e-270	-0.773719	0.952	0.979	6.2092e-266	down	2
Apln	3.01381e-76	0.653721	0.852	0.723	8.43806e-72	up	3
Cdkn1a	2.03298e-98	0.531869	0.959	0.895	5.69194e-94	up	3
Phlda3	3.42843e-166	0.52773	0.475	0.089	9.59891e-162	up	3
B2m	1.3754e-211	0.478361	0.994	0.966	3.85086e-207	up	3
Ly6a	3.30065e-74	0.47572	0.701	0.472	9.24116e-70	up	3
Odc1	1.44399e-45	0.465446	0.745	0.612	4.04287e-41	up	3
Jund	2.54585e-104	0.405384	0.996	0.983	7.12788e-100	up	3
H2-D1	3.47865e-124	0.403231	0.955	0.888	9.73953e-120	up	3
Wfdc1	1.21302e-82	0.38781	0.913	0.799	3.39622e-78	up	3
Hspb1	5.13453e-70	0.387468	0.956	0.889	1.43757e-65	up	3
Zfp36	4.00469e-54	0.386559	0.835	0.749	1.12123e-49	up	3
Dusp1	3.67749e-71	0.379358	0.983	0.938	1.02962e-66	up	3
Atf3	6.01036e-38	0.367327	0.712	0.573	1.68278e-33	up	3
Hspa1a	6.11489e-28	0.363314	0.583	0.438	1.71205e-23	up	3
Sat1	1.69857e-30	0.359914	0.956	0.898	4.75567e-26	up	3
Klf2	8.2262e-92	0.355207	0.999	0.999	2.30317e-87	up	3
Hist1h2bc	2.73147e-50	0.35407	0.806	0.658	7.64757e-46	up	3
Rps27l	1.61106e-98	0.342006	0.99	0.97	4.51066e-94	up	3
Esm1	5.77391e-51	0.339392	0.294	0.104	1.61658e-46	up	3
Icam1	4.88375e-34	0.3281	0.39	0.232	1.36735e-29	up	3
Apold1	1.91557e-63	0.321335	0.992	0.955	5.36322e-59	up	3
Nfkbia	3.38294e-41	0.318256	0.958	0.945	9.47156e-37	up	3
Pglyrp1	2.15856e-57	0.305153	0.994	0.983	6.04353e-53	up	3
Serpine1	2.18457e-41	0.295158	0.514	0.317	6.11636e-37	up	3
Nr4a1	9.10841e-41	0.289896	0.879	0.792	2.55017e-36	up	3
8430408G22Rik	1.34101e-28	0.289783	0.593	0.429	3.75455e-24	up	3
Fxyd5	5.4192e-57	0.288614	0.853	0.733	1.51727e-52	up	3
Capg	6.91457e-60	0.287241	0.847	0.703	1.93594e-55	up	3
Egr1	1.15788e-34	0.285154	0.871	0.792	3.24184e-30	up	3
Klf4	5.03059e-43	0.28176	0.955	0.926	1.40846e-38	up	3
Cyr61	1.45527e-25	0.281651	0.853	0.751	4.07445e-21	up	3
Fos	7.25433e-21	0.281223	0.948	0.924	2.03107e-16	up	3
Sfrp2	4.82335e-51	0.276916	0.653	0.424	1.35044e-46	up	3
Cxcl1	1.277e-48	0.275866	0.287	0.105	3.57534e-44	up	3
Mmrn2	4.55483e-39	0.271095	0.688	0.523	1.27526e-34	up	3
Rhoc	2.20265e-92	0.270438	0.993	0.99	6.16698e-88	up	3
Tnfrsf12a	1.29809e-59	0.268803	0.671	0.435	3.63441e-55	up	3
Ldha	4.45996e-62	0.268285	0.993	0.965	1.2487e-57	up	3
Gm26532	4.68782e-31	0.26754	0.653	0.501	1.3125e-26	up	3
Dlk1	1.29676e-31	0.260336	0.327	0.166	3.63066e-27	up	3
Ly6e	4.36745e-55	0.257529	0.962	0.902	1.2228e-50	up	3
Ankrd37	4.32726e-30	0.251572	0.774	0.659	1.21155e-25	up	3
H2-K1	1.22731e-48	0.251404	0.593	0.399	3.43622e-44	up	3
Meg3	9.20014e-20	0.251077	0.991	0.928	2.57586e-15	up	3
Pcolce	7.31907e-40	-0.250601	0.407	0.59	2.04919e-35	down	3
Bgn	1.30471e-40	-0.258091	0.939	0.97	3.65292e-36	down	3
Uba52	2.83938e-37	-0.258721	0.672	0.744	7.9497e-33	down	3
Pdcd10	3.01291e-58	-0.259973	0.62	0.756	8.43555e-54	down	3
Itm2a	5.43098e-58	-0.28173	0.998	0.998	1.52057e-53	down	3
Car4	1.78756e-32	-0.294459	0.824	0.881	5.00481e-28	down	3
Cryab	6.30678e-33	-0.301974	0.253	0.413	1.76577e-28	down	3
Myl9	9.11995e-64	-0.310216	0.979	0.989	2.5534e-59	down	3
Gm10076	1.94418e-88	-0.33768	0.987	0.991	5.44331e-84	down	3
Spock2	1.49183e-100	-0.346508	0.982	0.995	4.17684e-96	down	3
Fth1	3.15616e-88	-0.384097	1	1	8.83661e-84	down	3
Igfbp3	1.51989e-19	-0.41595	0.308	0.394	4.25539e-15	down	3
Sepp1	3.07309e-148	-0.596636	0.991	0.998	8.60402e-144	down	3
Odc1	3.82208e-154	0.767032	0.986	0.949	1.07011e-149	up	4
Ly6a	4.00302e-152	0.715755	0.91	0.664	1.12077e-147	up	4
Apln	1.10872e-132	0.704836	0.975	0.909	3.1042e-128	up	4
Wfdc1	2.09914e-155	0.640747	0.948	0.758	5.87717e-151	up	4
Vim	9.40074e-187	0.54958	1	0.996	2.63202e-182	up	4
Phlda3	4.10706e-180	0.52774	0.647	0.126	1.14989e-175	up	4
Cdkn1a	2.12567e-99	0.526273	0.963	0.95	5.95144e-95	up	4
Hspb1	2.42407e-121	0.518122	0.978	0.897	6.7869e-117	up	4
Capg	4.54492e-133	0.472239	0.915	0.742	1.27249e-128	up	4
B2m	1.19571e-164	0.452137	0.994	0.984	3.34776e-160	up	4
H2-D1	3.19192e-134	0.441813	0.972	0.931	8.93673e-130	up	4
Ankrd37	5.59586e-86	0.43226	0.95	0.854	1.56673e-81	up	4
Apold1	2.05346e-112	0.417627	0.993	0.975	5.74928e-108	up	4
Plaur	2.96684e-96	0.414326	0.836	0.603	8.30656e-92	up	4
Fxyd5	1.0112e-111	0.413483	0.954	0.862	2.83117e-107	up	4
Nfkbia	8.53733e-78	0.403635	0.99	0.971	2.39028e-73	up	4
Pmepa1	1.30825e-138	0.402493	0.988	0.961	3.66284e-134	up	4
Gngt2	1.27662e-125	0.396545	0.794	0.473	3.57427e-121	up	4
Aprt	6.91695e-102	0.390237	0.96	0.886	1.93661e-97	up	4
Rhoc	7.33832e-152	0.386495	0.997	0.992	2.05458e-147	up	4
Jund	1.00855e-86	0.38354	0.995	0.99	2.82374e-82	up	4
Anxa2	7.7424e-81	0.361328	0.99	0.981	2.16772e-76	up	4
Myadm	2.08893e-95	0.355492	0.908	0.763	5.84857e-91	up	4
Klk8	5.63455e-89	0.35499	0.817	0.617	1.57756e-84	up	4
Rps27l	9.1396e-122	0.354639	0.998	0.994	2.5589e-117	up	4
Klf2	1.31997e-84	0.349581	1	0.996	3.69565e-80	up	4
Trp53i11	8.97648e-50	0.346446	0.868	0.754	2.51324e-45	up	4
H2-K1	2.27674e-83	0.338148	0.804	0.589	6.37443e-79	up	4
Klf4	8.48937e-56	0.331214	0.975	0.93	2.37685e-51	up	4
Mesdc1	3.19636e-90	0.325132	0.913	0.773	8.94916e-86	up	4
Bax	5.76292e-99	0.324207	0.979	0.93	1.6135e-94	up	4
Kitl	3.89945e-85	0.318945	0.95	0.841	1.09177e-80	up	4
Hist1h2bc	4.07759e-53	0.31848	0.896	0.764	1.14164e-48	up	4
Carhsp1	4.68023e-85	0.317207	0.904	0.817	1.31037e-80	up	4
Ly6c1	5.6204e-55	0.309097	0.954	0.889	1.5736e-50	up	4
Ldha	2.64943e-79	0.306798	0.994	0.981	7.41787e-75	up	4
Rala	3.96704e-99	0.302969	0.968	0.942	1.11069e-94	up	4
Cd9	1.30405e-63	0.301863	0.808	0.605	3.65109e-59	up	4
Mmrn2	2.77664e-58	0.300916	0.845	0.639	7.77403e-54	up	4
S100a6	1.28835e-57	0.300382	0.358	0.107	3.60713e-53	up	4
Hspa1a	4.21289e-33	0.299247	0.567	0.359	1.17953e-28	up	4
Lpcat1	4.54731e-96	0.296689	0.827	0.554	1.27316e-91	up	4
Bbc3	3.07338e-81	0.296043	0.749	0.485	8.60485e-77	up	4
Ctnnb1	1.39999e-105	0.295473	0.99	0.978	3.91969e-101	up	4
Gpx1	2.67928e-103	0.293197	0.997	0.991	7.50146e-99	up	4
Gm26532	7.53202e-40	0.292757	0.751	0.542	2.10882e-35	up	4
Mcam	1.84038e-62	0.292012	0.926	0.862	5.15269e-58	up	4
S100a10	2.50399e-109	0.288739	0.526	0.135	7.01068e-105	up	4
Gimap4	2.20719e-71	0.286744	0.782	0.525	6.17969e-67	up	4
8430408G22Rik	3.19245e-35	0.282791	0.676	0.445	8.93822e-31	up	4
Cltb	1.13952e-83	0.281908	0.964	0.918	3.19044e-79	up	4
Dusp3	1.43853e-39	0.27887	0.987	0.955	4.0276e-35	up	4
Col4a2	2.14359e-82	0.272438	0.997	0.997	6.00163e-78	up	4
Atf3	1.73152e-29	0.269641	0.824	0.724	4.8479e-25	up	4
Msn	3.3393e-95	0.269571	0.993	0.982	9.34936e-91	up	4
Icam1	8.25697e-34	0.268697	0.761	0.609	2.31179e-29	up	4
Serpine1	3.53942e-57	0.268161	0.647	0.375	9.90966e-53	up	4
Hspg2	2.36597e-61	0.266524	0.954	0.9	6.62425e-57	up	4
Cdh13	1.7891e-65	0.266463	0.525	0.215	5.00912e-61	up	4
Cdc42se1	7.57941e-69	0.265985	0.921	0.848	2.12208e-64	up	4
Sfrp2	6.18754e-58	0.265589	0.674	0.387	1.73239e-53	up	4
Nr4a1	8.86765e-21	0.264491	0.895	0.845	2.48276e-16	up	4
Adam15	3.48927e-60	0.261573	0.887	0.741	9.76926e-56	up	4
Akap13	3.98219e-64	0.261402	0.97	0.913	1.11493e-59	up	4
Cyba	8.00167e-64	0.258965	0.975	0.954	2.24031e-59	up	4
Podxl	5.91589e-56	0.256223	0.876	0.746	1.65633e-51	up	4
Enpp2	3.00276e-58	-0.250535	0.606	0.789	8.40712e-54	down	4
Igf1r	1.44168e-39	-0.252472	0.912	0.937	4.03641e-35	down	4
Rpap3	5.00305e-42	-0.253214	0.667	0.773	1.40075e-37	down	4
Mfge8	1.69177e-46	-0.259582	0.929	0.962	4.73662e-42	down	4
Slc1a4	1.85233e-59	-0.274728	0.909	0.952	5.18616e-55	down	4
Gm10076	5.12454e-57	-0.280633	0.999	1	1.43477e-52	down	4
Fabp5	5.39924e-25	-0.282623	0.759	0.805	1.51168e-20	down	4
Cpe	5.62496e-46	-0.291862	0.775	0.863	1.57488e-41	down	4
Slc40a1	6.60986e-63	-0.292091	0.952	0.982	1.85063e-58	down	4
Pdcd10	1.97601e-90	-0.296886	0.736	0.873	5.53243e-86	down	4
Trf	1.61907e-31	-0.300384	0.793	0.853	4.53306e-27	down	4
Slc22a8	1.89539e-75	-0.301751	0.936	0.97	5.30671e-71	down	4
Slc39a8	9.81044e-90	-0.315385	0.938	0.973	2.74673e-85	down	4
Mfsd2a	1.47293e-53	-0.317911	0.948	0.979	4.12391e-49	down	4
Ildr2	5.84018e-70	-0.321601	0.54	0.75	1.63513e-65	down	4
Sept4	1.00081e-79	-0.333252	0.986	0.989	2.80208e-75	down	4
Rbp1	1.19292e-34	-0.336868	0.749	0.86	3.33995e-30	down	4
Slc3a2	1.39669e-62	-0.348099	0.991	0.996	3.91045e-58	down	4
Igfbp4	4.67772e-81	-0.352025	0.953	0.975	1.30967e-76	down	4
Slc7a1	7.85924e-88	-0.363234	0.982	0.987	2.20043e-83	down	4
Apoe	5.48382e-49	-0.365331	0.529	0.709	1.53536e-44	down	4
Car4	1.3019e-56	-0.373467	0.94	0.975	3.64506e-52	down	4
Hmgcs2	6.70213e-64	-0.374212	0.534	0.757	1.87646e-59	down	4
Ptn	9.2242e-48	-0.392919	0.979	0.967	2.58259e-43	down	4
Itm2a	2.16865e-94	-0.412967	0.99	0.999	6.07178e-90	down	4
Gatm	1.84312e-96	-0.41565	0.922	0.971	5.16035e-92	down	4
Bgn	1.05569e-85	-0.427147	0.892	0.966	2.95572e-81	down	4
Slco1c1	1.45817e-81	-0.437206	0.875	0.951	4.08257e-77	down	4
Nampt	1.82532e-157	-0.469422	0.897	0.969	5.11054e-153	down	4
Slc16a1	1.79882e-96	-0.474249	0.905	0.977	5.03635e-92	down	4
Myl9	9.81386e-79	-0.511417	0.897	0.939	2.74768e-74	down	4
Spock2	4.40243e-197	-0.659783	0.983	0.998	1.23259e-192	down	4
Fth1	3.7851e-193	-0.745968	1	1	1.05975e-188	down	4
Sepp1	5.74948e-272	-0.97344	0.973	0.999	1.60974e-267	down	4
Ttr	5.18534e-08	1.75095	0.248	0.165	0.00145179	up	5
Apln	1.32493e-28	0.488187	0.883	0.831	3.70954e-24	up	5
Esm1	9.36221e-52	0.480407	0.493	0.237	2.62123e-47	up	5
Phlda3	6.08559e-97	0.479709	0.48	0.121	1.70384e-92	up	5
Sat1	3.52853e-40	0.479278	0.953	0.927	9.87917e-36	up	5
B2m	1.63514e-113	0.471215	0.991	0.978	4.57807e-109	up	5
Isg15	8.14871e-30	0.444248	0.706	0.543	2.28148e-25	up	5
Atf3	1.35188e-39	0.425919	0.749	0.606	3.785e-35	up	5
Jund	3.42794e-68	0.416767	0.99	0.987	9.59753e-64	up	5
Cdkn1a	1.76393e-41	0.413925	0.976	0.957	4.93864e-37	up	5
Hist1h2bc	1.56991e-28	0.400479	0.828	0.77	4.39545e-24	up	5
H2-D1	5.03554e-73	0.393502	0.937	0.921	1.40985e-68	up	5
Odc1	1.02076e-17	0.383471	0.782	0.724	2.85793e-13	up	5
Zfp36	1.55291e-37	0.371846	0.828	0.756	4.34782e-33	up	5
Serpine1	9.59543e-36	0.358261	0.559	0.341	2.68653e-31	up	5
Vim	2.5493e-55	0.352866	0.991	0.991	7.13753e-51	up	5
Gm26532	7.18621e-40	0.352473	0.667	0.467	2.012e-35	up	5
Meg3	7.15583e-19	0.34449	0.802	0.651	2.00349e-14	up	5
Klf2	4.31479e-58	0.336845	0.993	0.998	1.20805e-53	up	5
Rps27l	5.6528e-56	0.335343	0.985	0.981	1.58267e-51	up	5
Hspa1a	4.22619e-27	0.32985	0.568	0.384	1.18325e-22	up	5
Fos	6.23691e-28	0.32949	0.956	0.933	1.74621e-23	up	5
Cxcl12	1.78108e-13	0.327055	0.635	0.516	4.98667e-09	up	5
Klf4	1.92757e-38	0.32212	0.965	0.927	5.3968e-34	up	5
Wfdc1	1.24486e-35	0.319707	0.876	0.786	3.48537e-31	up	5
Apold1	1.25059e-50	0.312358	0.985	0.988	3.50141e-46	up	5
Capg	5.7794e-60	0.311366	0.87	0.775	1.61812e-55	up	5
Hspb1	1.36959e-24	0.307047	0.931	0.914	3.83457e-20	up	5
Mmrn2	5.22946e-38	0.304423	0.783	0.679	1.46414e-33	up	5
Fosb	6.92205e-18	0.304232	0.763	0.693	1.93804e-13	up	5
Ifitm3	4.17389e-41	0.303152	0.927	0.846	1.16861e-36	up	5
Dusp1	3.06543e-31	0.297951	0.972	0.973	8.58259e-27	up	5
Col4a1	1.48451e-51	0.287672	0.995	0.988	4.15634e-47	up	5
Egr1	5.98515e-21	0.282272	0.864	0.797	1.67572e-16	up	5
Nfkbia	1.24901e-25	0.281257	0.968	0.957	3.49698e-21	up	5
Pmepa1	1.27732e-27	0.278602	0.933	0.916	3.57624e-23	up	5
H2-K1	1.34023e-46	0.277949	0.632	0.426	3.75238e-42	up	5
Bax	5.55701e-48	0.277021	0.947	0.882	1.55585e-43	up	5
Nr4a1	1.22905e-24	0.276158	0.888	0.807	3.4411e-20	up	5
Ldha	4.97755e-40	0.267101	0.984	0.965	1.39361e-35	up	5
Junb	2.02299e-22	0.263527	0.983	0.978	5.66397e-18	up	5
Col4a2	7.94136e-45	0.261299	0.989	0.987	2.22342e-40	up	5
Myadm	1.50902e-29	0.26118	0.707	0.585	4.22496e-25	up	5
Rhoc	1.32197e-48	0.260209	0.989	0.99	3.70126e-44	up	5
Cd9	1.36864e-23	0.259823	0.67	0.518	3.83191e-19	up	5
Id1	3.9699e-17	0.25891	0.945	0.934	1.11149e-12	up	5
Gadd45g	7.18276e-14	0.252346	0.387	0.275	2.01103e-09	up	5
Kcna5	1.25645e-30	-0.250423	0.342	0.53	3.51782e-26	down	5
Pdcd10	1.78884e-63	-0.253671	0.589	0.829	5.0084e-59	down	5
Gm10076	1.54771e-41	-0.27835	0.987	0.994	4.33327e-37	down	5
Apoe	4.51538e-16	-0.296904	0.609	0.708	1.26422e-11	down	5
Cpe	5.34082e-20	-0.304191	0.689	0.765	1.49532e-15	down	5
Spock2	2.51608e-45	-0.328289	0.962	0.995	7.04451e-41	down	5
Itm2a	4.2676e-53	-0.342751	0.985	0.997	1.19484e-48	down	5
Fth1	1.24017e-46	-0.355832	1	1	3.47222e-42	down	5
Car4	6.76581e-48	-0.495117	0.725	0.848	1.89429e-43	down	5
Sepp1	6.74851e-101	-0.571107	0.979	0.996	1.88945e-96	down	5
Wfdc1	2.98043e-173	1.13999	0.76	0.289	8.34461e-169	up	6
Ly6a	5.42873e-106	1.09295	0.536	0.158	1.51993e-101	up	6
Hspb1	9.26381e-104	0.86871	0.842	0.625	2.59368e-99	up	6
Ly6c1	8.43657e-77	0.86313	0.672	0.389	2.36207e-72	up	6
Igfbp3	5.2196e-45	0.822703	0.499	0.253	1.46138e-40	up	6
Nts	8.7554e-16	0.79282	0.259	0.135	2.45134e-11	up	6
Plaur	2.127e-148	0.765944	0.879	0.579	5.95518e-144	up	6
Odc1	2.01702e-93	0.74754	0.959	0.862	5.64726e-89	up	6
Klf2	1.48271e-118	0.698351	0.98	0.908	4.1513e-114	up	6
Capg	6.24962e-139	0.696156	0.918	0.699	1.74977e-134	up	6
Pgf	1.21631e-82	0.677008	0.316	0.027	3.40541e-78	up	6
Phlda3	7.24208e-122	0.651426	0.48	0.068	2.02764e-117	up	6
Vim	1.25184e-160	0.649685	1	0.998	3.5049e-156	up	6
Ifitm2	6.26435e-86	0.625652	0.713	0.412	1.75389e-81	up	6
S100a6	5.37864e-51	0.61538	0.23	0.031	1.50591e-46	up	6
Apln	3.21398e-88	0.603116	0.982	0.946	8.9985e-84	up	6
Anxa2	6.20131e-136	0.601141	0.997	0.978	1.73624e-131	up	6
Gngt2	3.85852e-117	0.59492	0.769	0.424	1.08031e-112	up	6
Klf4	6.2205e-62	0.561734	0.838	0.683	1.74162e-57	up	6
Aprt	1.23822e-76	0.548662	0.787	0.564	3.46678e-72	up	6
S100a11	1.89095e-85	0.542517	0.926	0.785	5.29427e-81	up	6
Esm1	4.58701e-28	0.539889	0.324	0.145	1.28427e-23	up	6
8430408G22Rik	1.49933e-58	0.53971	0.667	0.357	4.19784e-54	up	6
Tm4sf1	6.57082e-69	0.539137	0.751	0.469	1.8397e-64	up	6
Serpine1	1.85603e-59	0.537429	0.67	0.372	5.19652e-55	up	6
Myadm	9.82023e-107	0.519179	0.844	0.528	2.74947e-102	up	6
Kcne3	5.27744e-77	0.518723	0.589	0.239	1.47758e-72	up	6
S100a10	4.26355e-77	0.515942	0.372	0.073	1.19371e-72	up	6
Apold1	1.25067e-84	0.512042	0.98	0.93	3.50161e-80	up	6
Mesdc1	2.53775e-86	0.498192	0.764	0.487	7.10518e-82	up	6
Rnase1	4.20228e-58	0.498043	0.26	0.035	1.17655e-53	up	6
H2-D1	2.74462e-104	0.497936	0.976	0.889	7.6844e-100	up	6
Slc9a3r2	2.67674e-87	0.493929	0.94	0.841	7.49435e-83	up	6
Gapdh	2.35287e-110	0.482956	1	0.982	6.58756e-106	up	6
Tnfrsf12a	5.34999e-72	0.477198	0.653	0.346	1.49789e-67	up	6
B2m	6.27884e-112	0.476471	0.999	0.98	1.75795e-107	up	6
Cd9	4.22409e-64	0.474046	0.918	0.775	1.18266e-59	up	6
Ldha	1.94609e-98	0.466736	0.992	0.985	5.44866e-94	up	6
Dusp1	4.05733e-52	0.461951	0.943	0.859	1.13597e-47	up	6
Klk8	8.64328e-85	0.460244	0.551	0.201	2.41994e-80	up	6
Ahnak	2.90149e-74	0.458045	0.657	0.331	8.12361e-70	up	6
Tpi1	4.37609e-62	0.45748	0.922	0.769	1.22522e-57	up	6
Fxyd5	1.48865e-88	0.457454	0.962	0.863	4.16793e-84	up	6
Adam15	1.25122e-84	0.453655	0.646	0.299	3.50316e-80	up	6
Ankrd37	7.01351e-76	0.453404	0.971	0.878	1.96364e-71	up	6
Carhsp1	3.77881e-78	0.449544	0.772	0.524	1.05799e-73	up	6
Gpx1	5.08702e-105	0.448653	0.976	0.942	1.42426e-100	up	6
Rhoc	6.39133e-126	0.44033	1	0.992	1.78944e-121	up	6
Kitl	2.54218e-74	0.428602	0.848	0.655	7.1176e-70	up	6
Ier3	4.11233e-39	0.427714	0.772	0.593	1.15137e-34	up	6
Aldoa	3.27144e-92	0.427213	0.998	0.962	9.15938e-88	up	6
Sat1	2.22046e-32	0.418474	0.849	0.794	6.21685e-28	up	6
Mcam	2.82584e-63	0.410767	0.945	0.828	7.91179e-59	up	6
Col4a1	6.1429e-81	0.407795	0.998	0.974	1.71989e-76	up	6
Ifitm3	1.39612e-42	0.40642	0.781	0.612	3.90885e-38	up	6
Cdkn1a	7.30459e-36	0.400879	0.982	0.949	2.04514e-31	up	6
Icam2	2.8542e-63	0.385819	0.958	0.873	7.99118e-59	up	6
Atf3	1.42484e-24	0.379368	0.697	0.562	3.98927e-20	up	6
Slc2a1	4.44573e-48	0.37389	0.969	0.925	1.24472e-43	up	6
Rps27l	1.75967e-62	0.369834	0.982	0.951	4.92672e-58	up	6
Anxa5	2.33996e-67	0.367411	0.98	0.941	6.55143e-63	up	6
Hist1h2bc	1.98186e-39	0.367112	0.788	0.584	5.54881e-35	up	6
Uchl1	5.34726e-51	0.367044	0.716	0.46	1.49712e-46	up	6
Adamts1	1.28296e-45	0.367015	0.783	0.588	3.59204e-41	up	6
Ccnd2	3.28111e-52	0.363869	0.46	0.185	9.18644e-48	up	6
Angpt2	7.82323e-15	0.363634	0.673	0.556	2.19035e-10	up	6
Pmepa1	6.79801e-60	0.363386	0.956	0.889	1.90331e-55	up	6
Col4a2	1.48149e-73	0.362428	0.989	0.968	4.14789e-69	up	6
Bax	4.07996e-59	0.355819	0.926	0.811	1.14231e-54	up	6
Cdh13	8.85197e-37	0.353753	0.639	0.4	2.47837e-32	up	6
Mif	8.35995e-44	0.352298	0.931	0.86	2.34062e-39	up	6
Hsp90aa1	2.14601e-57	0.346668	0.941	0.825	6.00841e-53	up	6
Cxcl1	2.24224e-21	0.346365	0.203	0.074	6.27783e-17	up	6
H2-K1	1.1416e-34	0.346194	0.692	0.5	3.19626e-30	up	6
Gimap4	6.10566e-44	0.345906	0.795	0.572	1.70946e-39	up	6
Rnase4	1.5315e-49	0.34477	0.453	0.197	4.28789e-45	up	6
Hist1h1c	1.4782e-16	0.340743	0.674	0.544	4.13866e-12	up	6
1810011O10Rik	2.54985e-63	0.340073	0.467	0.166	7.13907e-59	up	6
Id1	1.29401e-24	0.339186	0.796	0.667	3.62298e-20	up	6
Cltb	2.73256e-55	0.338016	0.825	0.647	7.65063e-51	up	6
Akap13	1.30639e-48	0.337026	0.919	0.809	3.65762e-44	up	6
Nes	5.61226e-47	0.336535	0.9	0.788	1.57132e-42	up	6
Upp1	1.9306e-76	0.334714	0.376	0.07	5.40528e-72	up	6
Clic4	6.9465e-56	0.333733	0.864	0.727	1.94488e-51	up	6
Ly6e	2.16313e-34	0.331771	0.871	0.832	6.05634e-30	up	6
Nfkbia	8.04845e-25	0.327892	0.956	0.933	2.2534e-20	up	6
Msn	2.35413e-79	0.325241	0.984	0.956	6.59108e-75	up	6
Eif2b2	1.39829e-33	0.318843	0.701	0.504	3.91494e-29	up	6
Jund	1.19162e-40	0.315274	0.987	0.967	3.33629e-36	up	6
Eif6	6.44038e-40	0.314145	0.878	0.774	1.80318e-35	up	6
Cst3	9.38918e-48	0.313889	0.994	0.994	2.62878e-43	up	6
Pdlim7	2.09344e-49	0.310589	0.757	0.522	5.86121e-45	up	6
Mall	5.89608e-70	0.30995	0.406	0.103	1.65078e-65	up	6
Bhlhe40	8.41111e-44	0.307412	0.806	0.597	2.35494e-39	up	6
Phlda1	1.08834e-27	0.30611	0.839	0.748	3.04714e-23	up	6
Dusp3	2.97327e-44	0.305731	0.962	0.879	8.32456e-40	up	6
Kras	7.70151e-47	0.305015	0.721	0.493	2.15627e-42	up	6
Ramp3	9.1304e-67	0.303415	0.259	0.02	2.55633e-62	up	6
Tubb2b	7.43437e-38	0.302034	0.638	0.393	2.08148e-33	up	6
Neat1	1.3723e-25	0.300828	0.453	0.271	3.84218e-21	up	6
Lgals1	8.58321e-35	0.299389	0.427	0.202	2.40313e-30	up	6
Icam1	5.1822e-13	0.298979	0.49	0.371	1.45091e-08	up	6
Slc6a6	1.68932e-23	0.298847	0.293	0.138	4.72977e-19	up	6
Ctnnb1	5.49099e-58	0.296529	0.977	0.963	1.53737e-53	up	6
Lsr	2.7761e-46	0.293278	0.958	0.9	7.77252e-42	up	6
Spag9	4.49163e-31	0.287887	0.781	0.652	1.25757e-26	up	6
Ccnd1	1.88365e-29	0.286455	0.863	0.752	5.27383e-25	up	6
Cxx1a	9.1604e-41	0.285802	0.969	0.904	2.56473e-36	up	6
Nid2	3.49909e-32	0.28387	0.914	0.851	9.79674e-28	up	6
Tagln2	8.96487e-44	0.282964	0.995	0.971	2.50998e-39	up	6
Anxa7	3.20988e-37	0.279461	0.812	0.67	8.98703e-33	up	6
Arpc1b	3.34247e-85	0.27837	1	0.992	9.35824e-81	up	6
Mycn	1.85675e-42	0.277438	0.542	0.295	5.19853e-38	up	6
Lpcat1	1.06997e-36	0.274219	0.679	0.48	2.9957e-32	up	6
Pglyrp1	1.85607e-17	0.270826	0.97	0.956	5.19662e-13	up	6
Car5a	3.80831e-21	0.269952	0.572	0.421	1.06625e-16	up	6
Ckb	2.28783e-29	0.269647	0.507	0.297	6.40546e-25	up	6
Podxl	6.24513e-36	0.269467	0.639	0.432	1.74851e-31	up	6
Pdlim1	4.21679e-48	0.269279	0.29	0.068	1.18062e-43	up	6
Shisa5	1.64553e-45	0.267249	0.94	0.818	4.60716e-41	up	6
Pgam1	1.19041e-34	0.267008	0.891	0.766	3.33292e-30	up	6
Ccnd3	2.3945e-35	0.266325	0.888	0.776	6.70413e-31	up	6
Cdc42ep2	7.34894e-36	0.265476	0.524	0.299	2.05756e-31	up	6
Nme1	2.90596e-28	0.264629	0.889	0.768	8.1361e-24	up	6
Csrp1	1.31564e-37	0.264372	0.979	0.954	3.68352e-33	up	6
Cd81	7.76605e-57	0.264002	1	0.998	2.17434e-52	up	6
Flnb	1.97036e-27	0.263584	0.679	0.52	5.51662e-23	up	6
Slc16a3	4.43354e-43	0.263136	0.23	0.044	1.2413e-38	up	6
Adgrl4	6.66439e-42	0.257834	0.989	0.96	1.86589e-37	up	6
Rab11a	2.21459e-52	0.25729	0.978	0.942	6.2004e-48	up	6
Cdh5	1.13868e-27	0.256563	0.906	0.867	3.18806e-23	up	6
Nfic	1.39229e-28	0.252666	0.657	0.477	3.89814e-24	up	6
Gng11	9.20839e-46	0.250931	1	1	2.57817e-41	up	6
Car2	3.73952e-31	-0.250947	0.246	0.453	1.04699e-26	down	6
Cat	2.796e-25	-0.251185	0.57	0.695	7.82823e-21	down	6
Mpzl1	3.059e-49	-0.251991	0.976	0.996	8.56459e-45	down	6
Lmo2	1.69661e-35	-0.252726	0.931	0.97	4.75016e-31	down	6
Nrep	1.98971e-31	-0.253959	0.856	0.89	5.57078e-27	down	6
Uba52	9.98581e-21	-0.254202	0.642	0.73	2.79583e-16	down	6
Abcc4	5.55462e-25	-0.255131	0.251	0.425	1.55518e-20	down	6
Clec1a	2.19132e-22	-0.25539	0.788	0.891	6.13527e-18	down	6
Slc29a1	5.20795e-29	-0.256465	0.577	0.712	1.45812e-24	down	6
Dcbld1	3.27571e-34	-0.256565	0.722	0.826	9.17134e-30	down	6
Foxf2	6.08579e-34	-0.258257	0.88	0.93	1.7039e-29	down	6
Arhgap18	6.17493e-35	-0.259247	0.83	0.913	1.72886e-30	down	6
Ildr2	2.33529e-40	-0.26126	0.266	0.497	6.53835e-36	down	6
Txnip	9.14204e-26	-0.261387	0.273	0.452	2.55959e-21	down	6
Pde2a	3.17301e-28	-0.261505	0.696	0.817	8.88379e-24	down	6
Rps27	5.77087e-103	-0.263073	1	1	1.61573e-98	down	6
Lipa	5.5248e-28	-0.265607	0.729	0.839	1.54683e-23	down	6
Laptm4b	5.41809e-32	-0.26669	0.682	0.808	1.51696e-27	down	6
Arl6ip1	1.22365e-38	-0.266726	0.914	0.949	3.42597e-34	down	6
Rnf167	2.8132e-27	-0.266857	0.545	0.684	7.87639e-23	down	6
Tmem176b	5.88577e-20	-0.270378	0.36	0.52	1.6479e-15	down	6
Dok4	3.47923e-52	-0.27304	0.968	0.995	9.74115e-48	down	6
Raph1	3.30085e-35	-0.273745	0.824	0.882	9.24171e-31	down	6
Tmsb10	1.4659e-124	-0.274843	1	1	4.10424e-120	down	6
Igf1r	8.37255e-24	-0.278449	0.626	0.733	2.34415e-19	down	6
Rpap3	3.83234e-21	-0.279226	0.553	0.658	1.07298e-16	down	6
Selm	1.47277e-25	-0.280054	0.913	0.921	4.12347e-21	down	6
Cldn5	1.97879e-63	-0.283146	1	1	5.54022e-59	down	6
Bambi	3.37578e-34	-0.283957	0.85	0.923	9.4515e-30	down	6
Clec14a	5.31052e-16	-0.284871	0.638	0.71	1.48684e-11	down	6
AU021092	2.11549e-36	-0.288357	0.903	0.928	5.92296e-32	down	6
Tsc22d1	6.98696e-49	-0.291712	0.998	0.999	1.95621e-44	down	6
Fam13a	3.87504e-28	-0.292852	0.373	0.546	1.08493e-23	down	6
Bpgm	8.88481e-34	-0.294622	0.51	0.677	2.48757e-29	down	6
Rgcc	1.08433e-35	-0.301139	0.825	0.916	3.0359e-31	down	6
Dusp6	2.61284e-44	-0.302232	0.908	0.947	7.31542e-40	down	6
Tpd52l1	4.6159e-42	-0.305003	0.419	0.632	1.29236e-37	down	6
Nrros	3.1344e-34	-0.307839	0.568	0.742	8.77568e-30	down	6
Slc38a5	2.56207e-39	-0.308005	0.701	0.858	7.1733e-35	down	6
Rbp1	1.45549e-14	-0.308619	0.326	0.452	4.07508e-10	down	6
Cd320	1.80314e-38	-0.315523	0.591	0.759	5.04842e-34	down	6
Aplnr	1.23982e-32	-0.331402	0.862	0.909	3.47125e-28	down	6
Npr1	5.29685e-40	-0.334244	0.493	0.687	1.48301e-35	down	6
Tgfb2	3.6903e-46	-0.336472	0.188	0.433	1.03321e-41	down	6
Gm10076	4.29462e-56	-0.339557	0.981	0.991	1.20241e-51	down	6
Tshz2	1.25177e-48	-0.348401	0.617	0.802	3.5047e-44	down	6
Kcna5	4.36627e-40	-0.353602	0.284	0.517	1.22247e-35	down	6
Csrp2	2.6263e-86	-0.354426	0.974	0.994	7.35311e-82	down	6
Slc40a1	2.03521e-44	-0.355364	0.718	0.855	5.69819e-40	down	6
Cpe	1.16278e-36	-0.358232	0.613	0.793	3.25557e-32	down	6
Sh3bp5	2.57078e-48	-0.358862	0.656	0.807	7.19766e-44	down	6
Gabarapl1	2.75012e-68	-0.359645	0.898	0.974	7.69978e-64	down	6
Sept4	3.5853e-52	-0.3649	0.813	0.905	1.00381e-47	down	6
Slc7a5	1.19697e-60	-0.373976	0.961	0.989	3.35126e-56	down	6
Map7	2.47716e-45	-0.374466	0.33	0.561	6.93556e-41	down	6
Hmcn1	9.45541e-47	-0.380204	0.57	0.721	2.64733e-42	down	6
Mfsd2a	2.58812e-42	-0.38759	0.782	0.88	7.24623e-38	down	6
Gnb4	2.85382e-77	-0.40482	0.835	0.952	7.99013e-73	down	6
Foxq1	9.49568e-75	-0.405254	0.918	0.965	2.6586e-70	down	6
Gsta4	8.49475e-49	-0.410346	0.216	0.475	2.37836e-44	down	6
Slc7a1	3.97334e-46	-0.411314	0.692	0.867	1.11245e-41	down	6
Enpp2	1.06742e-66	-0.411952	0.535	0.767	2.98857e-62	down	6
Pim3	1.34168e-51	-0.417578	0.753	0.888	3.75645e-47	down	6
Prcp	2.05819e-46	-0.432525	0.626	0.801	5.76252e-42	down	6
Pdcd10	1.47748e-82	-0.442155	0.48	0.759	4.13664e-78	down	6
Cadm1	3.27062e-80	-0.446862	0.316	0.637	9.15708e-76	down	6
Ptpn18	5.98589e-60	-0.447972	0.498	0.719	1.67593e-55	down	6
Slc39a8	4.48616e-95	-0.452574	0.843	0.95	1.25604e-90	down	6
Slco1c1	3.51409e-47	-0.476628	0.578	0.78	9.83876e-43	down	6
Apod	8.3522e-56	-0.49007	0.922	0.96	2.33845e-51	down	6
Slc16a1	2.34378e-45	-0.505774	0.515	0.727	6.56211e-41	down	6
Nampt	1.30692e-99	-0.553585	0.594	0.837	3.65913e-95	down	6
Igfbp4	4.19724e-126	-0.573857	0.826	0.962	1.17514e-121	down	6
Bgn	7.42363e-65	-0.579498	0.344	0.638	2.07847e-60	down	6
Fth1	4.33838e-138	-0.587331	1	1	1.21466e-133	down	6
Slc1a4	4.53455e-115	-0.594215	0.639	0.887	1.26958e-110	down	6
Gatm	9.87767e-82	-0.594792	0.532	0.783	2.76555e-77	down	6
Itm2a	2.58821e-133	-0.606468	0.98	0.998	7.24648e-129	down	6
Car4	1.28636e-74	-0.638376	0.626	0.853	3.60155e-70	down	6
Spock2	1.26852e-108	-0.655137	0.709	0.932	3.55161e-104	down	6
Trf	6.70965e-124	-0.738795	0.852	0.959	1.87857e-119	down	6
Sepp1	1.08969e-229	-1.10673	0.945	0.996	3.05093e-225	down	6
Ly6a	2.20075e-176	1.23889	0.942	0.731	6.16165e-172	up	7
S100a6	2.39218e-107	1.16649	0.49	0.071	6.69761e-103	up	7
Crip1	3.09392e-90	0.945022	0.869	0.699	8.66235e-86	up	7
S100a10	1.58771e-128	0.87451	0.615	0.136	4.44527e-124	up	7
Hspb1	1.14982e-123	0.776717	0.947	0.827	3.21926e-119	up	7
Ifitm3	6.69837e-112	0.762897	0.942	0.763	1.87541e-107	up	7
Wfdc1	4.62192e-100	0.639897	0.88	0.669	1.29404e-95	up	7
Vim	1.73665e-146	0.639262	0.999	0.996	4.86228e-142	up	7
Ly6c1	1.34352e-93	0.570421	0.977	0.894	3.76158e-89	up	7
Anxa2	6.11187e-124	0.568582	0.997	0.993	1.7112e-119	up	7
Capg	5.30517e-106	0.562601	0.862	0.653	1.48534e-101	up	7
Cd9	8.40572e-78	0.554555	0.865	0.641	2.35343e-73	up	7
Tinagl1	3.04074e-87	0.545707	0.735	0.397	8.51348e-83	up	7
B2m	2.86891e-132	0.523889	0.991	0.983	8.03236e-128	up	7
Lgals1	3.56018e-42	0.519224	0.53	0.275	9.96779e-38	up	7
S100a11	1.26072e-91	0.515319	0.946	0.823	3.52977e-87	up	7
Ltc4s	6.9001e-62	0.503901	0.49	0.191	1.93189e-57	up	7
Ldha	7.55498e-98	0.467308	0.992	0.989	2.11524e-93	up	7
Ifitm2	7.86053e-59	0.456738	0.907	0.822	2.20079e-54	up	7
Tm4sf1	1.31679e-51	0.456058	0.803	0.611	3.68675e-47	up	7
H2-D1	5.60763e-86	0.444094	0.979	0.954	1.57002e-81	up	7
Aprt	1.18558e-84	0.441183	0.985	0.949	3.31938e-80	up	7
Klf2	2.05659e-75	0.429904	1	0.989	5.75803e-71	up	7
Plaur	1.07944e-61	0.429401	0.722	0.477	3.0222e-57	up	7
Klk8	1.18862e-85	0.428869	0.803	0.539	3.3279e-81	up	7
Fxyd5	1.60747e-66	0.420821	0.95	0.876	4.50059e-62	up	7
Gngt2	1.29003e-74	0.41508	0.723	0.441	3.61183e-70	up	7
Apold1	1.00554e-46	0.406068	0.958	0.907	2.8153e-42	up	7
Odc1	4.03584e-33	0.401389	0.97	0.963	1.12995e-28	up	7
Emp1	3.72573e-85	0.400302	0.442	0.078	1.04313e-80	up	7
H2-K1	6.13583e-46	0.39903	0.729	0.582	1.71791e-41	up	7
Adam15	2.37033e-63	0.396377	0.877	0.745	6.63646e-59	up	7
Slc6a6	1.4174e-30	0.376017	0.836	0.724	3.96845e-26	up	7
Anxa5	9.8417e-73	0.365935	0.962	0.906	2.75548e-68	up	7
Jund	7.93379e-47	0.364414	0.97	0.962	2.2213e-42	up	7
Klf4	2.6086e-40	0.358268	0.96	0.87	7.30355e-36	up	7
Mesdc1	7.95917e-54	0.350083	0.873	0.749	2.22841e-49	up	7
Rhoc	6.90359e-87	0.3489	0.995	0.986	1.93287e-82	up	7
Cyba	1.57824e-63	0.348577	0.958	0.932	4.41876e-59	up	7
Nfkbia	1.22474e-31	0.342492	0.953	0.922	3.42903e-27	up	7
Col4a1	3.47488e-62	0.33668	0.99	0.981	9.72897e-58	up	7
Atf3	2.69884e-17	0.334475	0.68	0.582	7.5562e-13	up	7
Neat1	1.82452e-34	0.334027	0.6	0.387	5.10829e-30	up	7
Mcam	4.59054e-39	0.330951	0.746	0.594	1.28526e-34	up	7
Anxa1	3.93168e-37	0.328073	0.39	0.16	1.10079e-32	up	7
Emp3	2.38515e-42	0.327794	0.344	0.108	6.67794e-38	up	7
Myadm	5.85204e-49	0.32537	0.726	0.525	1.63846e-44	up	7
Aldoa	1.19158e-39	0.324096	0.953	0.938	3.33619e-35	up	7
Slc9a3r2	4.59371e-55	0.316627	0.984	0.96	1.28615e-50	up	7
Lmna	1.90428e-33	0.309131	0.644	0.471	5.33159e-29	up	7
Gimap4	6.12376e-29	0.302948	0.684	0.534	1.71453e-24	up	7
Tuba1a	3.41851e-68	0.301115	1	1	9.57115e-64	up	7
Tpi1	8.06625e-41	0.300707	0.959	0.912	2.25839e-36	up	7
Thbd	5.95191e-39	0.299988	0.54	0.303	1.66642e-34	up	7
Id1	2.06231e-26	0.299835	0.935	0.939	5.77405e-22	up	7
Marcksl1	5.58814e-44	0.296873	0.956	0.913	1.56457e-39	up	7
Gpx1	3.44054e-72	0.294047	0.983	0.987	9.63283e-68	up	7
Ddah2	1.48199e-40	0.289157	0.879	0.791	4.14927e-36	up	7
Gm16104	8.00362e-44	0.284982	0.578	0.316	2.24085e-39	up	7
Icam2	2.13835e-36	0.278055	0.981	0.958	5.98696e-32	up	7
Vegfc	5.49602e-54	0.275952	0.458	0.165	1.53877e-49	up	7
Cltb	5.36776e-53	0.275212	0.967	0.911	1.50287e-48	up	7
Gapdh	7.69975e-59	0.274246	0.999	0.998	2.15578e-54	up	7
Dusp1	1.69453e-16	0.273798	0.913	0.891	4.74434e-12	up	7
Hsp90aa1	1.34853e-42	0.273326	0.991	0.984	3.77562e-38	up	7
S100a16	6.7619e-47	0.268917	0.991	0.974	1.8932e-42	up	7
Nme1	1.41696e-38	0.268168	0.977	0.956	3.96721e-34	up	7
Clic4	1.63189e-40	0.267125	0.891	0.814	4.56897e-36	up	7
Ahnak	5.22711e-32	0.265621	0.835	0.699	1.46349e-27	up	7
Carhsp1	5.71544e-36	0.265555	0.909	0.864	1.60021e-31	up	7
Uchl1	2.42628e-34	0.26324	0.696	0.508	6.79309e-30	up	7
Irx3	9.14796e-45	0.262738	0.443	0.18	2.56125e-40	up	7
Tagln2	4.7039e-46	0.262659	0.998	0.991	1.317e-41	up	7
Timp3	5.40488e-19	0.26234	0.36	0.214	1.51326e-14	up	7
Ankrd37	3.75812e-14	0.260454	0.788	0.725	1.0522e-09	up	7
Ly6e	5.94625e-35	0.259896	0.992	0.985	1.66483e-30	up	7
Lgals9	4.29761e-33	0.259328	0.897	0.804	1.20324e-28	up	7
Slc2a1	1.01108e-30	0.258933	0.992	0.976	2.83083e-26	up	7
Smagp	1.01903e-36	0.258347	0.9	0.804	2.85308e-32	up	7
Bst2	1.6943e-38	0.257622	0.884	0.777	4.7437e-34	up	7
Phlda3	4.18969e-45	0.251039	0.365	0.106	1.17303e-40	up	7
Pdlim7	8.74706e-36	0.250753	0.839	0.728	2.449e-31	up	7
Igfbp3	2.12448e-08	-0.251946	0.321	0.398	0.000594811	down	7
Cdc42ep3	5.21165e-25	-0.252066	0.7	0.859	1.45916e-20	down	7
Rpap3	7.5946e-37	-0.254988	0.528	0.724	2.12634e-32	down	7
Bpgm	6.0588e-41	-0.257347	0.465	0.696	1.69634e-36	down	7
Nrp1	5.94495e-31	-0.257586	0.771	0.921	1.66447e-26	down	7
Chst2	2.74659e-42	-0.258083	0.425	0.663	7.68991e-38	down	7
Gabarapl1	4.10836e-28	-0.26155	0.656	0.79	1.15026e-23	down	7
Dcbld1	2.24929e-35	-0.261738	0.423	0.634	6.29755e-31	down	7
Raph1	6.96301e-33	-0.263223	0.639	0.79	1.9495e-28	down	7
Ttyh2	2.14212e-24	-0.263653	0.715	0.868	5.9975e-20	down	7
Bambi	4.92416e-32	-0.270227	0.806	0.92	1.37867e-27	down	7
Oaz2	5.1893e-37	-0.270384	0.888	0.956	1.4529e-32	down	7
Ildr2	1.63302e-41	-0.270886	0.386	0.619	4.57213e-37	down	7
Sparcl1	2.53661e-23	-0.280467	0.912	0.966	7.102e-19	down	7
Lrp8	1.88878e-38	-0.281501	0.812	0.948	5.28821e-34	down	7
Tdrp	1.93496e-36	-0.283098	0.81	0.925	5.41751e-32	down	7
Dok4	3.76204e-37	-0.283262	0.904	0.968	1.05329e-32	down	7
Rbp1	2.31153e-21	-0.289545	0.768	0.875	6.47181e-17	down	7
Hmgcs2	1.17174e-29	-0.29228	0.541	0.736	3.28064e-25	down	7
Igf1r	6.90322e-34	-0.292882	0.639	0.814	1.93276e-29	down	7
Hbegf	6.87433e-42	-0.294463	0.561	0.797	1.92467e-37	down	7
Csrp2	7.13955e-56	-0.299558	0.956	0.993	1.99893e-51	down	7
Tsc22d1	2.57352e-42	-0.301919	0.981	1	7.20535e-38	down	7
Slc1a4	2.33782e-49	-0.311048	0.708	0.877	6.54543e-45	down	7
Ccdc85b	6.73489e-51	-0.311961	0.743	0.881	1.88563e-46	down	7
Foxq1	4.16585e-40	-0.315113	0.824	0.949	1.16635e-35	down	7
Car2	1.26788e-46	-0.315244	0.629	0.831	3.54981e-42	down	7
Uba52	7.1949e-44	-0.31654	0.767	0.88	2.01443e-39	down	7
Enpp2	1.26743e-60	-0.324357	0.275	0.586	3.54855e-56	down	7
Rgcc	8.29502e-34	-0.324576	0.645	0.813	2.32244e-29	down	7
Abhd2	6.21906e-07	-0.331537	0.802	0.866	0.0174121	down	7
Slc7a5	1.0784e-44	-0.334755	0.893	0.98	3.01931e-40	down	7
Hmcn1	1.54194e-54	-0.336463	0.565	0.786	4.31713e-50	down	7
Itm2a	3.91419e-47	-0.336986	0.988	0.999	1.0959e-42	down	7
Slc40a1	9.892e-52	-0.347071	0.816	0.954	2.76956e-47	down	7
Slc3a2	6.1293e-45	-0.350627	0.955	1	1.71608e-40	down	7
Trf	1.59826e-37	-0.354744	0.536	0.74	4.47482e-33	down	7
AU021092	5.96636e-58	-0.361556	0.791	0.934	1.67046e-53	down	7
Gm10076	2.26532e-86	-0.369486	0.997	0.999	6.34244e-82	down	7
Gatm	3.29259e-61	-0.374187	0.848	0.961	9.21858e-57	down	7
Igfbp4	6.26187e-74	-0.430201	0.872	0.953	1.7532e-69	down	7
Map7	8.4683e-87	-0.439629	0.438	0.768	2.37096e-82	down	7
Mfsd2a	3.32636e-63	-0.447714	0.814	0.977	9.31313e-59	down	7
Bgn	2.4645e-59	-0.453531	0.62	0.876	6.90011e-55	down	7
Slc7a1	3.62657e-80	-0.45814	0.889	0.991	1.01537e-75	down	7
Sept4	2.76513e-86	-0.460164	0.676	0.896	7.74181e-82	down	7
Slc39a8	8.29609e-102	-0.46386	0.791	0.97	2.32274e-97	down	7
Slc22a8	5.96416e-97	-0.480025	0.715	0.95	1.66985e-92	down	7
Cpe	1.24077e-71	-0.482368	0.566	0.831	3.47391e-67	down	7
Hist1h2ap	5.47573e-09	-0.483413	0.554	0.598	0.00015331	down	7
Pdcd10	2.86747e-132	-0.496275	0.509	0.849	8.02835e-128	down	7
Nampt	1.28675e-122	-0.547748	0.816	0.969	3.60263e-118	down	7
Slc16a1	1.65669e-114	-0.686497	0.777	0.978	4.63841e-110	down	7
Slco1c1	1.55895e-115	-0.735921	0.641	0.959	4.36476e-111	down	7
Sepp1	4.28352e-157	-0.836226	0.882	0.978	1.1993e-152	down	7
Spock2	1.40675e-168	-0.860409	0.768	0.979	3.93863e-164	down	7
Fth1	2.66323e-155	-0.937138	1	1	7.45651e-151	down	7
Fbln5	3.56738e-17	0.51906	0.583	0.395	9.98794e-13	up	8
H2-K1	6.99461e-22	0.518352	0.683	0.536	1.95835e-17	up	8
B2m	1.87006e-66	0.509691	1	0.987	5.2358e-62	up	8
8430408G22Rik	6.89392e-32	0.504824	0.896	0.753	1.93016e-27	up	8
Phlda3	3.83794e-40	0.481824	0.471	0.181	1.07455e-35	up	8
Ifitm3	1.80248e-36	0.475717	0.972	0.862	5.04657e-32	up	8
Sat1	7.77412e-31	0.465388	0.985	0.947	2.1766e-26	up	8
H2-D1	7.15211e-34	0.439624	0.964	0.954	2.00245e-29	up	8
Stmn2	2.10602e-19	0.409657	0.613	0.391	5.89643e-15	up	8
Ptn	1.28193e-31	0.406239	0.957	0.863	3.58915e-27	up	8
Cdkn1a	2.06728e-19	0.380259	0.975	0.887	5.78796e-15	up	8
Mmrn2	4.57089e-25	0.35173	0.896	0.78	1.27976e-20	up	8
Esm1	3.44999e-10	0.324767	0.264	0.141	9.65927e-06	up	8
Tm4sf1	9.37156e-19	0.310204	0.966	0.91	2.62385e-14	up	8
Hspa1a	2.03746e-11	0.307041	0.62	0.502	5.70447e-07	up	8
Emp2	9.9048e-15	0.278972	0.589	0.423	2.77314e-10	up	8
Fbln2	4.95247e-17	0.277785	0.778	0.58	1.38659e-12	up	8
Tmem100	4.89274e-18	0.269582	0.74	0.515	1.36987e-13	up	8
Fstl1	7.5761e-12	0.26907	0.676	0.548	2.12116e-07	up	8
Isg15	1.61421e-11	0.267214	0.704	0.584	4.51946e-07	up	8
Nfkbia	1.08408e-23	0.26442	0.981	0.975	3.03521e-19	up	8
Plk2	3.55935e-18	0.264165	0.954	0.833	9.96546e-14	up	8
Bax	9.57603e-18	0.261629	0.906	0.878	2.6811e-13	up	8
Nebl	2.25046e-12	0.255186	0.903	0.838	6.30084e-08	up	8
Rpl38	4.0237e-30	-0.250164	1	1	1.12656e-25	down	8
Ccdc85b	2.84419e-24	-0.259454	0.761	0.865	7.96316e-20	down	8
Slc40a1	1.74025e-21	-0.269644	0.868	0.94	4.87235e-17	down	8
Itm2a	2.42461e-15	-0.275138	1	1	6.78843e-11	down	8
Uba52	2.21271e-19	-0.275255	0.694	0.783	6.19514e-15	down	8
Slc38a5	6.58273e-10	-0.280923	0.741	0.805	1.84303e-05	down	8
Slc7a5	1.06848e-12	-0.293367	0.838	0.893	2.99154e-08	down	8
Slco2a1	8.48837e-14	-0.294514	0.331	0.468	2.37657e-09	down	8
Dok4	3.96342e-18	-0.311778	0.729	0.843	1.10968e-13	down	8
Pdcd10	2.75469e-48	-0.367016	0.566	0.777	7.71259e-44	down	8
Gm10076	1.14766e-40	-0.376617	0.989	0.994	3.21322e-36	down	8
Fth1	4.4998e-22	-0.379768	1	1	1.25985e-17	down	8
S100a6	1.85696e-45	2.11079	0.83	0.059	5.19911e-41	up	9
Ltc4s	5.92928e-42	1.43272	0.882	0.356	1.66008e-37	up	9
Crip1	2.93817e-44	1.35424	0.967	0.568	8.2263e-40	up	9
Ly6a	6.07682e-46	1.34041	0.996	0.712	1.70139e-41	up	9
S100a10	1.64928e-43	1.28121	0.937	0.381	4.61764e-39	up	9
Nts	1.04368e-16	1.08323	0.42	0.008	2.92211e-12	up	9
Ifitm2	4.2421e-44	1.03231	1	0.771	1.1877e-39	up	9
Anxa2	1.71373e-46	1.02115	0.994	0.941	4.79811e-42	up	9
Cd9	7.68865e-31	0.985398	0.93	0.602	2.15267e-26	up	9
Klk8	6.65322e-39	0.967133	0.908	0.407	1.86277e-34	up	9
Lgals1	1.47286e-35	0.924445	0.811	0.186	4.12371e-31	up	9
Ccdc184	7.21655e-31	0.912717	0.693	0.085	2.02049e-26	up	9
S100a11	5.07834e-37	0.906874	0.97	0.831	1.42183e-32	up	9
Wfdc1	7.25219e-30	0.88633	0.945	0.695	2.03047e-25	up	9
Capg	5.97648e-33	0.877697	0.922	0.712	1.67329e-28	up	9
Vim	8.81496e-47	0.868139	1	1	2.46801e-42	up	9
Hmgb2	5.86107e-28	0.862335	0.935	0.729	1.64098e-23	up	9
Emp3	2.03565e-21	0.843525	0.61	0.119	5.69942e-17	up	9
Hspb1	6.88029e-27	0.827936	0.983	0.754	1.92634e-22	up	9
Tinagl1	1.5184e-25	0.825861	0.871	0.492	4.25123e-21	up	9
Ifitm3	8.13367e-34	0.81913	1	0.992	2.27727e-29	up	9
Fxyd5	4.85849e-27	0.809694	0.939	0.822	1.36028e-22	up	9
Thbd	5.56914e-30	0.783609	0.799	0.322	1.55925e-25	up	9
Col4a1	4.67553e-33	0.767676	0.983	0.898	1.30906e-28	up	9
Adam15	5.62396e-33	0.734213	0.965	0.839	1.5746e-28	up	9
Gimap4	1.99917e-19	0.730135	0.678	0.288	5.59729e-15	up	9
Apln	2.00509e-15	0.726712	0.664	0.28	5.61385e-11	up	9
Ldha	2.64939e-30	0.720794	0.998	0.949	7.41777e-26	up	9
Emp1	5.20328e-25	0.708031	0.651	0.085	1.45681e-20	up	9
Gngt2	4.61031e-26	0.700606	0.848	0.525	1.29079e-21	up	9
Vegfc	1.3799e-27	0.680919	0.749	0.229	3.86344e-23	up	9
Plaur	1.95101e-19	0.672079	0.745	0.381	5.46245e-15	up	9
H2-D1	2.3163e-34	0.666344	0.987	0.958	6.48518e-30	up	9
2200002D01Rik	3.68575e-18	0.66452	0.68	0.288	1.03194e-13	up	9
Mesdc1	1.74386e-24	0.651556	0.889	0.644	4.88246e-20	up	9
Prss23	1.22565e-12	0.648085	0.444	0.11	3.43157e-08	up	9
Tagln2	2.09655e-29	0.640345	0.993	0.924	5.86993e-25	up	9
Anxa1	2.13428e-17	0.633635	0.555	0.119	5.97555e-13	up	9
Ramp3	2.71109e-20	0.624651	0.556	0.093	7.59052e-16	up	9
Ankrd37	3.20335e-11	0.618828	0.682	0.449	8.96873e-07	up	9
Tcf15	4.12116e-13	0.60261	0.453	0.102	1.15384e-08	up	9
Aprt	1.18436e-27	0.593866	0.991	0.898	3.31597e-23	up	9
Id1	1.79795e-13	0.591062	0.983	0.89	5.03389e-09	up	9
Mcam	8.18074e-19	0.586088	0.725	0.347	2.29044e-14	up	9
Podxl	2.79714e-21	0.580408	0.837	0.534	7.83144e-17	up	9
Hn1	5.6638e-19	0.577835	0.902	0.822	1.58575e-14	up	9
Tnfrsf9	8.56568e-12	0.574137	0.305	0	2.39822e-07	up	9
Gapdh	5.25527e-27	0.566282	0.998	0.992	1.47137e-22	up	9
Cotl1	4.46931e-15	0.56042	0.78	0.559	1.25132e-10	up	9
Slc2a1	3.04242e-12	0.552567	0.991	0.907	8.51817e-08	up	9
Cryab	3.65988e-18	0.549105	0.492	0.025	1.02469e-13	up	9
Hsp90aa1	9.77616e-21	0.54654	0.978	0.924	2.73713e-16	up	9
Anxa5	1.33455e-24	0.543974	0.987	0.949	3.73646e-20	up	9
Pdia5	3.02243e-14	0.537109	0.571	0.229	8.46219e-10	up	9
Slc9a3r2	3.74434e-24	0.533428	0.993	0.907	1.04834e-19	up	9
Ube2s	1.44527e-19	0.531467	0.928	0.831	4.04646e-15	up	9
Nsg1	7.14144e-15	0.529933	0.689	0.314	1.99946e-10	up	9
Upp1	2.03458e-17	0.528375	0.447	0.025	5.69642e-13	up	9
Tm4sf1	2.15633e-17	0.521995	0.922	0.712	6.0373e-13	up	9
Cnn2	6.72614e-18	0.521765	0.895	0.746	1.88318e-13	up	9
Cald1	3.33003e-27	0.518796	0.85	0.407	9.32343e-23	up	9
Bmp2	3.54995e-12	0.50412	0.438	0.102	9.93914e-08	up	9
Clic1	1.67764e-22	0.495872	0.996	0.983	4.69706e-18	up	9
Ppp1r2	1.18762e-13	0.493367	0.941	0.898	3.3251e-09	up	9
Tspo	5.42816e-15	0.493272	0.806	0.619	1.51978e-10	up	9
Rhoc	7.20319e-20	0.48544	0.996	0.992	2.01675e-15	up	9
Ezr	1.07291e-13	0.484367	0.628	0.28	3.00395e-09	up	9
Mustn1	1.61932e-09	0.482591	0.562	0.297	4.53378e-05	up	9
Eif6	1.45527e-15	0.479772	0.896	0.746	4.07445e-11	up	9
Crip2	1.40876e-33	0.479409	1	1	3.94425e-29	up	9
Clic4	1.15256e-15	0.475982	0.911	0.712	3.22695e-11	up	9
Ackr3	2.84229e-08	0.475788	0.259	0.025	0.000795784	up	9
Timp3	2.91645e-15	0.473241	0.791	0.458	8.16547e-11	up	9
Ywhah	7.12784e-18	0.468385	0.976	0.966	1.99565e-13	up	9
Palm	1.48496e-15	0.467198	0.81	0.5	4.15759e-11	up	9
Tpi1	3.88518e-12	0.466884	0.915	0.831	1.08777e-07	up	9
Fstl1	2.71091e-15	0.466854	0.749	0.364	7.59e-11	up	9
Cenpa	2.49459e-12	0.462761	0.375	0.042	6.98436e-08	up	9
Bst2	1.06296e-10	0.461551	0.848	0.653	2.97609e-06	up	9
S100a16	7.78426e-19	0.456654	0.989	0.966	2.17944e-14	up	9
Ndrg1	9.46068e-13	0.45219	0.532	0.169	2.6488e-08	up	9
Ly6c1	5.1085e-14	0.450653	1	0.771	1.43028e-09	up	9
H2-K1	8.47338e-10	0.450117	0.893	0.746	2.37238e-05	up	9
B2m	1.51993e-20	0.435665	1	0.983	4.25551e-16	up	9
Ehd1	3.24448e-12	0.431146	0.817	0.593	9.0839e-08	up	9
Psmb8	6.00139e-11	0.430743	0.64	0.356	1.68027e-06	up	9
Rbm3	1.49643e-18	0.4281	0.998	0.992	4.18969e-14	up	9
Plagl1	1.06729e-11	0.425665	0.344	0.025	2.98819e-07	up	9
Birc5	8.70182e-10	0.422203	0.329	0.059	2.43633e-05	up	9
Lmna	1.71181e-13	0.421363	0.719	0.407	4.79272e-09	up	9
Pdgfa	1.93384e-07	0.418018	0.56	0.356	0.00541438	up	9
Serpinb6a	2.67438e-08	0.415741	0.83	0.72	0.000748773	up	9
Cd55	1.75999e-15	0.411303	0.536	0.136	4.92763e-11	up	9
Klf2	2.01655e-15	0.41017	1	1	5.64595e-11	up	9
Col4a2	1.4792e-11	0.41017	0.946	0.949	4.14146e-07	up	9
Klf4	4.64577e-12	0.409938	0.987	0.907	1.30072e-07	up	9
Ehd2	2.50498e-10	0.409434	0.732	0.466	7.01343e-06	up	9
Nfkbia	2.13518e-09	0.409239	0.98	0.907	5.97808e-05	up	9
Bax	6.53454e-14	0.407488	0.867	0.78	1.82954e-09	up	9
Cd34	4.50289e-10	0.407334	0.963	0.915	1.26072e-05	up	9
Shisa5	3.01891e-13	0.407067	0.841	0.78	8.45235e-09	up	9
Cltb	4.87752e-15	0.404862	0.95	0.822	1.36561e-10	up	9
Myadm	1.41259e-10	0.402821	0.76	0.678	3.95496e-06	up	9
Agpat4	1.02509e-13	0.402501	0.721	0.441	2.87005e-09	up	9
Psmb4	2.95161e-15	0.401445	0.974	0.814	8.26392e-11	up	9
2700094K13Rik	1.9061e-10	0.398863	0.81	0.746	5.3367e-06	up	9
Rab11a	2.38155e-17	0.396924	0.991	0.949	6.66787e-13	up	9
Arhgdib	1.22871e-11	0.395941	0.689	0.449	3.44014e-07	up	9
Cks2	6.71819e-10	0.393746	0.617	0.339	1.88096e-05	up	9
Tipin	1.47445e-11	0.393649	0.564	0.246	4.12817e-07	up	9
C1qtnf6	1.43995e-10	0.393193	0.484	0.178	4.03158e-06	up	9
Avpi1	1.8837e-13	0.388039	0.51	0.169	5.27398e-09	up	9
Ube2c	6.80192e-08	0.387532	0.29	0.059	0.0019044	up	9
Icam2	6.28704e-14	0.386987	0.993	0.898	1.76025e-09	up	9
Carhsp1	3.17128e-13	0.385582	0.941	0.78	8.87896e-09	up	9
Gm16104	1.24255e-09	0.384273	0.612	0.356	3.4789e-05	up	9
Cd81	1.33826e-18	0.383203	0.998	1	3.74687e-14	up	9
Ybx3	1.88154e-12	0.380674	0.83	0.644	5.26794e-08	up	9
Ddah2	1.21261e-11	0.379165	0.902	0.814	3.39507e-07	up	9
Rhoa	1.73207e-19	0.378942	1	1	4.84946e-15	up	9
Phlda3	1.80596e-10	0.378582	0.473	0.161	5.05632e-06	up	9
Adprh	1.29724e-11	0.376052	0.752	0.568	3.63201e-07	up	9
Itgb1	1.99477e-16	0.374794	0.989	0.949	5.58494e-12	up	9
Apold1	1.26405e-07	0.374544	0.95	0.847	0.00353909	up	9
Calcrl	2.0448e-08	0.373768	0.518	0.263	0.000572503	up	9
Lbp	5.33243e-11	0.372417	0.647	0.305	1.49297e-06	up	9
Kdelr2	6.64519e-08	0.372141	0.839	0.763	0.00186052	up	9
Heg1	5.83829e-10	0.368329	0.843	0.653	1.6346e-05	up	9
Lxn	4.79505e-11	0.367843	0.9	0.831	1.34252e-06	up	9
Ckb	2.4872e-09	0.367492	0.466	0.161	6.96365e-05	up	9
Litaf	1.77249e-08	0.366387	0.762	0.61	0.000496262	up	9
Calm1	9.50155e-22	0.36627	1	1	2.66024e-17	up	9
Ehd4	4.16058e-08	0.366072	0.68	0.5	0.00116488	up	9
Mall	5.77388e-13	0.36411	0.473	0.136	1.61657e-08	up	9
Fuca2	5.86566e-09	0.363993	0.438	0.161	0.000164227	up	9
Cxx1a	1.00598e-10	0.36068	0.941	0.805	2.81654e-06	up	9
Gltp	1.52662e-06	0.359576	0.773	0.602	0.0427423	up	9
Top2a	1.41057e-07	0.357786	0.283	0.059	0.00394931	up	9
S100a13	5.90268e-12	0.357667	0.959	0.898	1.65263e-07	up	9
Bhlhe40	1.03427e-07	0.357341	0.704	0.542	0.00289574	up	9
Tbrg1	1.21319e-10	0.357003	0.871	0.763	3.39668e-06	up	9
Gpx1	6.64964e-12	0.355031	0.983	0.966	1.86177e-07	up	9
Csrp1	1.09331e-10	0.355023	0.961	0.949	3.06104e-06	up	9
Hdgf	9.23146e-12	0.354264	0.885	0.856	2.58462e-07	up	9
Irx3	1.33446e-09	0.354096	0.616	0.314	3.73622e-05	up	9
Atp6v0e	2.58772e-13	0.348232	0.954	0.881	7.24509e-09	up	9
1810011O10Rik	9.25259e-09	0.346499	0.481	0.195	0.000259054	up	9
Tubb2b	5.86131e-10	0.344666	0.604	0.297	1.64105e-05	up	9
Plekho1	1.84976e-10	0.344445	0.471	0.161	5.17895e-06	up	9
Rexo2	2.63069e-10	0.344038	0.871	0.797	7.36539e-06	up	9
Sap30	1.99563e-10	0.343633	0.584	0.314	5.58736e-06	up	9
Ly6e	1.85658e-11	0.343483	0.998	0.924	5.19806e-07	up	9
Bst1	5.58794e-12	0.341355	0.394	0.068	1.56451e-07	up	9
Ahnak	1.36222e-11	0.341231	0.872	0.729	3.81395e-07	up	9
Anxa7	2.67026e-10	0.338425	0.81	0.627	7.47619e-06	up	9
Ap3s1	1.60406e-10	0.337789	0.86	0.72	4.49105e-06	up	9
Arpc4	7.40309e-10	0.333587	0.839	0.653	2.07272e-05	up	9
Ran	7.00546e-10	0.331978	0.957	0.915	1.96139e-05	up	9
Myl6	4.64427e-23	0.331372	1	1	1.3003e-18	up	9
Grn	8.69722e-09	0.331279	0.858	0.754	0.000243505	up	9
Zbtb20	6.77968e-08	0.326872	0.732	0.517	0.00189818	up	9
Actn1	1.90893e-08	0.326751	0.824	0.551	0.000534462	up	9
Cib1	1.78065e-09	0.326607	0.706	0.5	4.98547e-05	up	9
Arpc2	4.12652e-13	0.326031	0.998	1	1.15534e-08	up	9
Chmp4b	2.07873e-10	0.32596	0.869	0.763	5.82004e-06	up	9
Snx3	9.22308e-15	0.32418	0.998	1	2.58228e-10	up	9
Actg1	3.98005e-20	0.32306	1	1	1.11434e-15	up	9
Plin3	1.31143e-09	0.322458	0.641	0.373	3.67176e-05	up	9
Anxa3	7.89603e-12	0.321812	0.996	0.941	2.21073e-07	up	9
Psmc6	1.05189e-07	0.321292	0.774	0.585	0.00294509	up	9
Pdlim7	2.35117e-08	0.321046	0.824	0.636	0.000658281	up	9
Hint1	1.46158e-14	0.320567	0.987	0.958	4.09214e-10	up	9
Serpinb1a	6.55527e-08	0.320048	0.292	0.059	0.00183534	up	9
Kras	7.06468e-11	0.319269	0.815	0.644	1.97797e-06	up	9
Pitpna	3.23611e-08	0.318574	0.85	0.661	0.000906045	up	9
Arf5	1.63244e-14	0.317522	0.991	0.966	4.57051e-10	up	9
Atpif1	5.72601e-17	0.317414	0.998	0.992	1.60317e-12	up	9
Prmt1	3.28659e-09	0.317188	0.865	0.763	9.2018e-05	up	9
Mras	5.55633e-09	0.3161	0.283	0.034	0.000155566	up	9
Gars	2.30922e-07	0.315706	0.712	0.5	0.00646535	up	9
Mcfd2	1.45127e-06	0.315653	0.595	0.381	0.0406326	up	9
1110008F13Rik	5.01679e-09	0.314641	0.858	0.788	0.00014046	up	9
Cyb5r3	5.99804e-12	0.312089	0.957	0.941	1.67933e-07	up	9
Higd2a	8.2889e-11	0.310551	0.974	0.924	2.32073e-06	up	9
Ppp1r11	3.42888e-08	0.310469	0.815	0.771	0.000960018	up	9
Elovl1	7.19008e-09	0.310032	0.739	0.559	0.000201308	up	9
Lfng	1.16097e-06	0.309454	0.338	0.127	0.032505	up	9
Nudt4	1.3634e-07	0.309271	0.532	0.254	0.00381723	up	9
Rfk	3.91726e-09	0.30921	0.501	0.22	0.000109675	up	9
Ap2m1	1.15093e-10	0.30662	0.97	0.924	3.22236e-06	up	9
Hspa1a	2.96152e-09	0.305265	0.274	0.017	8.29168e-05	up	9
Ccnb2	2.17487e-11	0.305035	0.307	0.008	6.08921e-07	up	9
Psmc2	1.67527e-08	0.304632	0.745	0.551	0.000469041	up	9
Msn	1.62134e-09	0.304493	0.943	0.966	4.53942e-05	up	9
Chic2	1.72581e-07	0.303616	0.712	0.559	0.00483192	up	9
Capzb	5.02752e-11	0.303078	0.97	0.89	1.40761e-06	up	9
Mif	2.09469e-07	0.30185	0.909	0.805	0.0058647	up	9
Ufd1l	1.44392e-11	0.301434	0.994	0.966	4.04269e-07	up	9
Uchl1	1.27648e-07	0.301052	0.564	0.297	0.00357388	up	9
Ripply3	6.77536e-14	0.300884	0.442	0.068	1.89696e-09	up	9
Trpv4	2.05518e-11	0.300243	0.362	0.051	5.75408e-07	up	9
Tpm3	6.33976e-09	0.299529	0.983	0.924	0.000177501	up	9
Psme2	6.9762e-09	0.298887	0.884	0.678	0.00019532	up	9
Lrrc8c	3.8335e-08	0.296844	0.508	0.263	0.0010733	up	9
Ranbp1	1.64487e-08	0.295803	0.922	0.831	0.000460529	up	9
Rap1a	2.86812e-10	0.295111	0.943	0.864	8.03015e-06	up	9
Zyx	5.03475e-08	0.293413	0.8	0.703	0.00140963	up	9
Snrpc	2.39238e-08	0.293224	0.826	0.72	0.000669819	up	9
Mgll	3.32352e-09	0.292082	0.429	0.136	9.30519e-05	up	9
Lgals9	2.50265e-09	0.290116	0.906	0.839	7.00691e-05	up	9
Tuba1c	3.45021e-08	0.289465	0.466	0.237	0.000965989	up	9
Prelid1	9.96299e-11	0.287411	0.945	0.975	2.78944e-06	up	9
Prkcdbp	2.86514e-08	0.286725	0.919	0.754	0.000802182	up	9
Ncoa3	3.56744e-09	0.283821	0.412	0.119	9.98812e-05	up	9
Mtch1	3.32149e-09	0.283807	0.837	0.712	9.29952e-05	up	9
Kif5b	2.30378e-08	0.283659	0.937	0.898	0.000645013	up	9
Txn1	4.08501e-10	0.282798	0.978	0.966	1.14372e-05	up	9
Ssna1	2.79949e-07	0.282544	0.817	0.585	0.00783802	up	9
Myl12a	6.57345e-11	0.282257	0.998	0.992	1.84044e-06	up	9
Sfr1	1.09516e-08	0.282086	0.885	0.78	0.000306624	up	9
Nsmce1	1.49315e-07	0.280945	0.71	0.559	0.00418051	up	9
Psma2	2.27357e-08	0.280176	0.911	0.873	0.000636555	up	9
Vimp	5.50347e-07	0.27996	0.647	0.415	0.0154086	up	9
Dstn	1.83606e-09	0.279773	0.982	0.924	5.1406e-05	up	9
Hspg2	5.08453e-07	0.278852	0.732	0.576	0.0142357	up	9
Pacsin2	5.51402e-09	0.278524	0.471	0.195	0.000154381	up	9
Emcn	1.38033e-08	0.278446	0.959	0.839	0.000386464	up	9
Ddx24	9.43819e-07	0.278273	0.688	0.602	0.0264251	up	9
Plpp1	2.08159e-07	0.276582	0.665	0.424	0.00582804	up	9
Igfbp7	9.00336e-09	0.276432	1	0.966	0.000252076	up	9
Tpst2	4.48528e-07	0.276033	0.811	0.72	0.0125579	up	9
Ecscr	1.92639e-07	0.274501	0.985	0.975	0.00539349	up	9
Slc16a3	4.01757e-08	0.274442	0.227	0.008	0.00112484	up	9
Psmd8	3.51206e-07	0.273135	0.922	0.941	0.00983305	up	9
Sf3b6	5.08918e-07	0.272955	0.872	0.814	0.0142487	up	9
Shfm1	2.29069e-11	0.272892	0.994	0.992	6.41348e-07	up	9
Emc8	4.4362e-08	0.272774	0.625	0.398	0.00124205	up	9
Aldoa	1.74666e-07	0.272449	0.982	0.975	0.00489031	up	9
Wdr1	1.08109e-07	0.272424	0.856	0.78	0.00302684	up	9
Arl6ip5	3.53031e-08	0.270864	0.908	0.822	0.000988417	up	9
Uqcrb	1.898e-09	0.270837	0.98	0.975	5.31403e-05	up	9
Psmb1	2.55103e-13	0.269322	0.991	0.975	7.14239e-09	up	9
Ost4	1.08438e-07	0.268503	0.945	0.839	0.00303604	up	9
Ptp4a2	2.61738e-08	0.268413	0.937	0.907	0.000732814	up	9
Ndufa8	6.20121e-09	0.266901	0.945	0.932	0.000173622	up	9
Erh	3.2491e-09	0.266568	0.991	0.975	9.09682e-05	up	9
Rtn4	4.23431e-07	0.266214	0.952	0.907	0.0118552	up	9
Vcam1	1.10531e-06	0.265821	0.431	0.186	0.0309465	up	9
Psmb2	5.9903e-10	0.264246	0.959	0.932	1.67717e-05	up	9
Lsr	1.87437e-08	0.263573	0.982	0.89	0.000524785	up	9
Rer1	3.0312e-08	0.263018	0.869	0.814	0.000848675	up	9
Praf2	6.67966e-07	0.262462	0.564	0.347	0.0187017	up	9
Ybx1	1.5678e-09	0.262145	0.991	0.983	4.38953e-05	up	9
Psma7	8.22779e-09	0.260963	0.985	1	0.000230362	up	9
Bad	1.31448e-06	0.260279	0.774	0.619	0.0368028	up	9
Zfp706	2.3264e-09	0.259879	0.935	0.898	6.51346e-05	up	9
Tbca	8.00126e-09	0.257427	0.963	0.949	0.000224019	up	9
Eif1	7.99309e-19	0.255945	1	1	2.2379e-14	up	9
Ube2l3	3.88142e-08	0.255324	0.913	0.822	0.00108672	up	9
Sdhb	4.84282e-07	0.254315	0.891	0.754	0.0135589	up	9
Cfl1	1.25064e-11	0.25356	1	1	3.50155e-07	up	9
C130074G19Rik	9.80293e-08	-0.251587	0.453	0.661	0.00274462	down	9
Ly75	2.86065e-11	-0.252583	0.153	0.407	8.00924e-07	down	9
Tle1	1.41992e-07	-0.252658	0.484	0.729	0.00397549	down	9
Rabep2	6.07339e-07	-0.25313	0.322	0.517	0.0170043	down	9
Rps27	1.68771e-17	-0.253893	1	1	4.72525e-13	down	9
Ahcyl1	8.16951e-09	-0.254345	0.292	0.534	0.00022873	down	9
Ndufa7	4.45057e-08	-0.254903	0.932	0.958	0.00124607	down	9
Gm10073	6.33686e-07	-0.255684	0.627	0.788	0.0177419	down	9
Ecm1	2.99419e-07	-0.257519	0.736	0.856	0.00838313	down	9
Pnrc1	5.76527e-07	-0.257717	0.821	0.941	0.0161416	down	9
Lims1	1.0504e-06	-0.258675	0.669	0.822	0.029409	down	9
Apex1	7.46387e-07	-0.258764	0.51	0.712	0.0208973	down	9
Rpl35	1.33535e-15	-0.259745	1	1	3.73871e-11	down	9
Tjp1	9.36646e-09	-0.263318	0.706	0.856	0.000262242	down	9
Mpzl1	4.51296e-08	-0.26336	0.946	0.958	0.00126354	down	9
Eif4b	2.54853e-12	-0.263492	0.713	0.898	7.13536e-08	down	9
Fam102a	6.0945e-13	-0.263589	0.157	0.424	1.70634e-08	down	9
Tdg	9.47026e-12	-0.263912	0.272	0.559	2.65148e-07	down	9
Tiam1	1.01837e-06	-0.265915	0.264	0.449	0.0285123	down	9
Isyna1	1.2877e-08	-0.266876	0.83	0.949	0.000360529	down	9
Csf1	2.3675e-09	-0.269484	0.244	0.492	6.62853e-05	down	9
Rhobtb1	1.27165e-09	-0.270063	0.338	0.61	3.56036e-05	down	9
Lmntd1	1.62359e-15	-0.270199	0.107	0.381	4.54574e-11	down	9
Scarb1	1.73778e-09	-0.270493	0.506	0.72	4.86544e-05	down	9
Arl2	2.60864e-08	-0.272451	0.396	0.602	0.000730367	down	9
Myo10	3.97391e-08	-0.273463	0.51	0.712	0.00111262	down	9
Rgcc	2.06221e-08	-0.27513	0.468	0.712	0.000577378	down	9
Tshz2	5.09919e-09	-0.277146	0.71	0.856	0.000142767	down	9
Htra1	1.67893e-07	-0.277735	0.087	0.254	0.00470067	down	9
Ushbp1	8.75701e-07	-0.277755	0.486	0.686	0.0245179	down	9
St3gal6	7.75076e-07	-0.280092	0.693	0.788	0.0217006	down	9
Ets1	5.53337e-07	-0.2804	0.791	0.864	0.0154923	down	9
Sema6a	1.16004e-08	-0.283656	0.654	0.864	0.000324789	down	9
Kctd12b	1.43022e-15	-0.284083	0.196	0.534	4.00432e-11	down	9
Zic3	3.67694e-07	-0.284639	0.445	0.653	0.0102947	down	9
Slc43a2	9.28071e-11	-0.287615	0.237	0.517	2.59841e-06	down	9
Aspscr1	3.69544e-07	-0.288019	0.468	0.627	0.0103465	down	9
Grcc10	2.55679e-07	-0.288289	0.447	0.653	0.00715849	down	9
Slc38a2	3.80178e-08	-0.289386	0.808	0.924	0.00106442	down	9
Baz2b	1.43229e-09	-0.290426	0.577	0.839	4.01012e-05	down	9
Gtf2i	6.23467e-11	-0.290776	0.643	0.856	1.74558e-06	down	9
Fzd6	9.30196e-11	-0.291885	0.475	0.729	2.60436e-06	down	9
Tspan13	5.07484e-08	-0.293236	0.845	0.966	0.00142085	down	9
Pdcd10	1.48119e-08	-0.293395	0.447	0.653	0.000414703	down	9
Tspan18	1.74055e-06	-0.295093	0.662	0.805	0.0487319	down	9
Son	1.59181e-13	-0.299672	0.911	1	4.45675e-09	down	9
Vwa1	4.0931e-08	-0.300165	0.952	0.949	0.00114599	down	9
Maoa	1.65535e-06	-0.302923	0.721	0.831	0.0463465	down	9
mt-Nd5	1.45105e-08	-0.304142	0.769	0.915	0.000406266	down	9
Notum	3.45626e-13	-0.304274	0.111	0.373	9.67683e-09	down	9
Myo6	3.79061e-09	-0.305424	0.366	0.61	0.000106129	down	9
Lyl1	8.19931e-20	-0.313581	0.213	0.61	2.29564e-15	down	9
Slc30a1	5.02843e-10	-0.313738	0.492	0.746	1.40786e-05	down	9
Frmd4b	1.29044e-08	-0.313886	0.654	0.797	0.000361298	down	9
Aplnr	2.27717e-08	-0.318593	0.98	0.966	0.000637561	down	9
Gdap10	1.3486e-10	-0.322952	0.214	0.449	3.77581e-06	down	9
Slc16a4	2.30254e-11	-0.331799	0.277	0.568	6.44666e-07	down	9
Tdrp	2.07294e-13	-0.332138	0.591	0.881	5.80381e-09	down	9
Jun	1.7176e-08	-0.332518	0.954	0.966	0.000480892	down	9
Tspan5	8.32159e-12	-0.334041	0.819	0.941	2.32988e-07	down	9
Stab1	8.85157e-10	-0.336269	0.262	0.517	2.47826e-05	down	9
Net1	4.7796e-14	-0.336838	0.41	0.729	1.33819e-09	down	9
Ppard	2.81286e-12	-0.338607	0.312	0.593	7.87544e-08	down	9
Slco2b1	8.12134e-10	-0.3399	0.497	0.703	2.27381e-05	down	9
Cdh2	5.04318e-09	-0.344683	0.494	0.712	0.000141199	down	9
Tmsb10	7.45594e-20	-0.347894	1	1	2.08752e-15	down	9
Gm10076	4.0614e-16	-0.355566	0.993	1	1.13711e-11	down	9
Nkd1	3.83416e-07	-0.35784	0.767	0.847	0.0107349	down	9
Prr5l	1.59313e-20	-0.358301	0.209	0.61	4.46045e-16	down	9
Slc52a2	3.11072e-15	-0.364702	0.262	0.576	8.70938e-11	down	9
Foxf2	9.08751e-10	-0.365304	0.677	0.839	2.54432e-05	down	9
Htra3	7.20067e-10	-0.367386	0.322	0.593	2.01604e-05	down	9
Abhd17a	5.13111e-11	-0.371309	0.673	0.797	1.43661e-06	down	9
Gnb4	3.62494e-12	-0.37163	0.553	0.763	1.01491e-07	down	9
Prcp	1.47574e-10	-0.371694	0.906	0.966	4.13178e-06	down	9
Ccdc85b	2.92994e-11	-0.374846	0.627	0.788	8.20325e-07	down	9
Tpd52l1	1.37184e-09	-0.384741	0.342	0.602	3.84088e-05	down	9
Npr1	1.05212e-11	-0.385783	0.512	0.754	2.94573e-07	down	9
Ptov1	1.66987e-12	-0.386988	0.78	0.915	4.67531e-08	down	9
Ttyh2	4.06344e-11	-0.39489	0.44	0.686	1.13768e-06	down	9
Cadm1	2.85611e-21	-0.39927	0.214	0.627	7.99653e-17	down	9
Gabarapl1	7.7543e-09	-0.405145	0.499	0.72	0.000217105	down	9
Angptl4	1.7914e-12	-0.407368	0.64	0.881	5.01557e-08	down	9
Adgrl3	1.35171e-16	-0.407992	0.224	0.542	3.78452e-12	down	9
Arl4a	3.4182e-14	-0.412441	0.933	0.975	9.57028e-10	down	9
Gsta4	4.41559e-14	-0.416525	0.506	0.797	1.23628e-09	down	9
Smyd2	1.45034e-13	-0.4225	0.492	0.754	4.06066e-09	down	9
Csrp2	1.54552e-16	-0.422564	0.884	0.941	4.32714e-12	down	9
Bambi	3.66674e-13	-0.424809	0.567	0.864	1.02662e-08	down	9
Sept4	1.25387e-13	-0.438051	0.457	0.771	3.5106e-09	down	9
Grap	8.45891e-14	-0.439161	0.804	0.966	2.36833e-09	down	9
Hmcn1	5.16435e-18	-0.442631	0.257	0.636	1.44591e-13	down	9
Uba52	1.54348e-12	-0.443219	0.699	0.856	4.32144e-08	down	9
Gpcpd1	3.66079e-13	-0.444634	0.58	0.822	1.02495e-08	down	9
Cpe	7.639e-14	-0.445075	0.499	0.754	2.13877e-09	down	9
Rpl38	4.14101e-36	-0.448663	1	1	1.1594e-31	down	9
Car2	1.46334e-16	-0.448934	0.301	0.644	4.09705e-12	down	9
Gstm7	2.33849e-22	-0.449457	0.272	0.678	6.5473e-18	down	9
Rgs12	3.76099e-13	-0.450508	0.464	0.729	1.053e-08	down	9
Cldn5	2.24045e-25	-0.451593	1	1	6.27281e-21	down	9
Cd320	2.27368e-17	-0.45657	0.445	0.771	6.36586e-13	down	9
Lrp8	5.74227e-14	-0.459051	0.51	0.771	1.60772e-09	down	9
Slc39a10	3.71817e-15	-0.465127	0.656	0.822	1.04101e-10	down	9
Map7	1.02048e-30	-0.47247	0.122	0.576	2.85714e-26	down	9
Mfap2	4.20273e-12	-0.473526	0.105	0.331	1.17668e-07	down	9
Mafb	1.4728e-17	-0.478421	0.111	0.415	4.12353e-13	down	9
Ctla2a	1.08779e-18	-0.488615	0.957	0.975	3.0456e-14	down	9
Slc7a5	8.13231e-15	-0.494916	0.675	0.881	2.27688e-10	down	9
Itm2a	2.88007e-22	-0.497958	0.985	1	8.06362e-18	down	9
Flrt2	3.41582e-19	-0.503913	0.421	0.771	9.56361e-15	down	9
Hmgcs2	1.85026e-12	-0.505363	0.518	0.763	5.18035e-08	down	9
Ildr2	6.38071e-32	-0.513327	0.222	0.729	1.78647e-27	down	9
Igf1r	3.50299e-18	-0.51643	0.516	0.797	9.80768e-14	down	9
Lmo2	1.34099e-20	-0.519699	0.861	0.975	3.75451e-16	down	9
Sparcl1	1.01447e-16	-0.520732	0.872	0.983	2.8403e-12	down	9
Prnp	3.83851e-14	-0.52626	0.728	0.839	1.07471e-09	down	9
Enpp2	1.3771e-25	-0.545959	0.089	0.449	3.85561e-21	down	9
Slc1a4	1.85856e-20	-0.564521	0.407	0.763	5.20361e-16	down	9
Gatm	4.18787e-19	-0.593791	0.673	0.881	1.17252e-14	down	9
Slc3a2	2.66158e-20	-0.599738	0.878	0.975	7.4519e-16	down	9
Malat1	8.19927e-22	-0.600927	1	1	2.29563e-17	down	9
Bgn	5.53135e-11	-0.634858	0.384	0.653	1.54867e-06	down	9
Tsc22d1	2.64561e-26	-0.639074	0.987	1	7.40717e-22	down	9
Nrep	4.83837e-24	-0.659008	0.736	0.958	1.35465e-19	down	9
Foxq1	2.59266e-19	-0.67794	0.651	0.873	7.25893e-15	down	9
Synm	8.31994e-28	-0.678089	0.201	0.636	2.32942e-23	down	9
Tfrc	8.2642e-17	-0.68697	0.608	0.814	2.31381e-12	down	9
Slc39a8	5.90106e-34	-0.70006	0.433	0.881	1.65218e-29	down	9
Mfsd2a	1.8095e-23	-0.711161	0.403	0.771	5.06625e-19	down	9
Trf	2.28738e-12	-0.719391	0.335	0.585	6.40421e-08	down	9
Rbp1	1.04161e-20	-0.739772	0.601	0.873	2.9163e-16	down	9
Slc22a8	6.34344e-30	-0.758992	0.399	0.814	1.77604e-25	down	9
Igfbp4	1.82775e-13	-0.760886	0.799	0.932	5.11732e-09	down	9
Slc7a1	1.22088e-22	-0.770396	0.732	0.881	3.41821e-18	down	9
Nampt	2.13975e-30	-0.822931	0.549	0.864	5.99086e-26	down	9
Slc40a1	1.86154e-24	-0.864423	0.662	0.864	5.21195e-20	down	9
Slc16a1	1.23322e-22	-0.900808	0.436	0.763	3.45277e-18	down	9
Slco1c1	1.88029e-44	-0.929508	0.231	0.831	5.26444e-40	down	9
Apoe	6.42907e-22	-1.25675	0.388	0.771	1.80001e-17	down	9
Fth1	1.43312e-45	-1.4892	0.996	1	4.01246e-41	down	9
Spock2	4.27784e-43	-1.54506	0.505	0.898	1.19771e-38	down	9
Sepp1	1.02971e-52	-1.69311	0.874	0.983	2.88297e-48	down	9
