# Supplementary material for: Mapping endothelial-cell diversity in cerebral cavernous malformations at single-cell resolution
Source: eLife. 2020 Nov 3;9:e61413. doi: 10.7554/eLife.61413 (PMC7609066; doi:10.7554/eLife.61413)
Supplement: Supplementary file 9. [file elife-61413-supp9.xlsx]

## Sheet: Supplementary File 9
	Supplementary File 9: details of statistical analysis
											Statistical test
	Figure	Number of litters	Conditions	Sample	n mice	Mean	SD	SEM	95% confidence interval of the mean	Median	Statistical test	Multiple comparison correction	pvalue
	Figure 2F	2	A	Pdcd10 wt, cerebellum	6	1.019	0.4285	0.1749	0.5691-1.468	0.9688	One-way ANOVA	Sidak's test	B vs A, <0.0001 D vs C, 0.0024 F vs E, 0.2137
			B	Pdcd10 ko, cerebellum	6	5.007	1.761	0.6656	3.378-6.636	4.688
			C	Pdcd10 wt, hippocampus	6	3.622	1.522	0.6214	2.025-5.219	3.692
			D	Pdcd10 ko, hippocampus	6	1.634	0.719	0.2935	4.333-9.043	1.7
			E	Pdcd10 wt, cortex	6	6.688	2.244	0.9162	0.8793-2.388	6.076
			F	Pdcd10 ko, cortex	6	3.144	0.9473	0.3867	2.15-4.138	3.046
	Figure 4E	2	A	Pdcd10 wt	6	19.68	2.759	1.126	16.78-22.57	19.13	One-way ANOVA	Tukey's test	B vs A, 0.9967 C vs A, 0.0004 C vs B, 0.0004
			B	Pdcd10 ko, pseudo normal	6	20.35	13.89	5.671	5.77-34.93	14.58
			C	Pdcd10 ko, lesions	6	64.12	21.88	8.934	41.15-87.08	60.88
	Figure 4G	1	A	Pdcd10 wt, ECs	2	0.28	-	-	-	-	Fisher Exact test	-	C vs. B, <0.0001
			B	Pdcd10 ko, ECs	2	0.32	-	-	-	-
			C	Pdcd10 ko, lesion ECs	2	0.52	-	-	-	-
	Figure 5E	1	A	Pdcd10 wt	3	19.85	3.245	1.873	11.79-27.91	18.56	Unpaired t-test	-	0.0029
			B	Pdcd10 ko	3	53.26	8.313	4.8	32.61-73.91	54.36
	Figure 5G Tip Cells	2	A	Pdcd10 wt	6	78.43	16.54	6.752	61.08-95.79	84.25	Unpaired t-test	-	0.2493
			B	Pdcd10 ko	6	68	12.76	5.211	54.6-81.4	65.45
	Figure 5H Tip Cells	4	A	Pdcd10 wt	10	2.003	0.3005	0.09501	1.788-2.418	2.014	Unpaired t-test	-	0.0005
			B	Pdcd10 ko	13	2.742	0.5365	0.1488	2.218-3.067	2.671
	Figure 5H Tip-like Cells	4	A	Pdcd10 wt	10	10.56	3.991	1.262	7.705-13.85	10.7	Mann-Whitney test	-	0.0011
			B	Pdcd10 ko	13	18.59	7.847	2.176	13.41-23.33	16.2
	Figure 5H Filopodia/cell	4	A	Pdcd10 wt	10	9.45	1.214	0.3839	8.582-10.32	9.4	Unpaired t-test	-	0.9386
			B	Pdcd10 ko	13	9.485	0.9191	0.2549	8.929-10.04	9.6
	Figure 5J	4	A	Pdcd10 wt	10	1889	125.2	39.59	1800-1979	1855	Unpaired t-test	-	<0.0001
			B	Pdcd10 ko	13	1440	268.1	74.35	1278-1608	1456
	Figure S5B	1	A	Pdcd10 wt, ECs	2	0.06	-	-	-	-	Fisher Exact test	-	C vs. B, <0.0001
			B	Pdcd10 ko, ECs	2	0.18	-	-	-	-
			C	Pdcd10 ko, lesion ECs	2	0.37	-	-	-	-
	Figure S5C	1	A	Pdcd10 wt, ECs	2	0.025	-	-	-	-	Fisher Exact test	-	C vs. B, <0.0001
			B	Pdcd10 ko, ECs	2	0.067	-	-	-	-
			C	Pdcd10 ko, lesion ECs	2	0.224	-	-	-	-
